# Supplementary material for: Low-level cadmium exposure induced hormesis in peppermint young plant by constantly activating antioxidant activity based on physiological and transcriptomic analyses
Source: Front Plant Sci. 2023 Jan 23;14:1088285. doi: 10.3389/fpls.2023.1088285 (PMC9899930; doi:10.3389/fpls.2023.1088285)
Supplement: Supplementary file 1 [file DataSheet_1.xlsx]

## Sheet: biomarker
Supplementary Data S1:Functional annotation and identification of unigenes by blasting in different databases. All of these genes were aligned using BLASTx (E values ≤0.05) searches against the NR, Swiss-Port, GO, COG, KOG protein databases, and KEGG pathway databases.
Time (h)	0 h				24 h				24 h				24 h				72 h				72 h				72 h
#ID	control-1_FPKM	0 h control-2_FPKM	0 h control-3_FPKM	AVERAGE	control-1_FPKM	control-2_FPKM	control-3_FPKM	AVERAGE	1.6 mg/L Cd-1_FPKM	1.6 mg/L Cd2_FPKM	1.6 mg/LCd3_FPKM	AVERAGE	6.5 mg/L Cd-1_FPKM	6.5 mg/L Cd-2_FPKM	6.5 mg/L Cd-3_FPKM	AVERAGE	control-1_FPKM	control-2_FPKM	control-3_FPKM	AVERAGE	1.6 mg/L Cd-1_FPKM	1.6 mg/L Cd-2_FPKM	1.6 mg/L Cd-3_FPKM	AVERAGE	6.5 mg/L Cd-1_FPKM	6.5 mg/L Cd-2_FPKM	6.5 mg/L Cd-3_FPKM	AVERAGE	COG_class_annotation	GO_annotation	KEGG_annotation	KOG_class_annotation	Pfam_annotation	Swissprot_annotation	TrEMBL_annotation	eggNOG_class_annotation	nr_annotation	GO_second_level_annotation	KEGG_pathway_annotation	nr_Symbol
c64870.graph_c0	0.09	0.17	0.09	0.12	0	0	0.88	0.29	0.39	0.08	0.37	0.28	0.34	0.17	0.41	0.31	0.63	0.83	0.07	0.51	0.18	0.16	0.11	0	0	0.27	0.17	0.15	--	Molecular Function: UDP-glycosyltransferase activity (GO:0008194);; Cellular Component: intracellular membrane-bounded organelle (GO:0043231);;	K13080|2.3e-92|vvi:100244875|K13080 flavanone 7-O-glucoside 2''-O-beta-L-rhamnosyltransferase [EC:2.4.1.236] | (RefSeq) flavanone 7-O-glucoside 2''-O-beta-L-rhamnosyltransferase	--	--	Beta-D-glucosyl crocetin beta-1,6-glucosyltransferase OS=Gardenia jasminoides OX=114476 GN=UGT94E5 PE=1 SV=1	Glycosyltransferase OS=Erythranthe guttata OX=4155 GN=MIMGU_mgv1a019121mg PE=3 SV=1	--	PREDICTED: beta-D-glucosyl crocetin beta-1,6-glucosyltransferase-like [Erythranthe guttata]	molecular function: catalytic activity (GO:0003824);; cellular component: cell (GO:0005623);; cellular component: organelle (GO:0043226);; cellular component: cell part (GO:0044464)	Flavonoid biosynthesis (ko00941);; Flavone and flavonol biosynthesis (ko00944)	LOC105977326
c95450.graph_c0	0	1.17	0	0.39	0	0	0	0	0	0	0	0	0	0	0.36	0.12	0	0	0	0	0	0	0.13	0.4	0	0	0	0	--	Molecular Function: hydrolase activity, hydrolyzing O-glycosyl compounds (GO:0004553);; Biological Process: carbohydrate metabolic process (GO:0005975);;	K19893|1.6e-14|peq:110033468|K19893 glucan endo-1,3-beta-glucosidase 5/6 [EC:3.2.1.39] | (RefSeq) glucan endo-1,3-beta-glucosidase 6-like	--	X8 domain	--	Glucan endo-1,3-beta-D-glucosidase OS=Salvia splendens OX=180675 GN=Saspl_027244 PE=3 SV=1	--	hypothetical protein Saspl_027244 [Salvia splendens]	molecular function: catalytic activity (GO:0003824);; biological process: metabolic process (GO:0008152)	Starch and sucrose metabolism (ko00500)	--
c797.graph_c0	0	0	0	0	0	0	0	0	0.41	0	0	0.14	0.43	1.44	0	0.62	0	0	0	0	0	0	0	0	0	0	0	0	--	--	--	--	--	--	--	--	--	--	--	--
c105877.graph_c0	0	0	0	0	0	0	0	0	0	0	0	0	0	0	0	0	0	0	0	0	0	0	0.95	2.86	0	0	0	0	--	--	--	--	--	--	--	--	--	--	--	--
c30321.graph_c0	0	0	0	0	0	0	0	0	0	0	0	0	0	0	1.35	0.45	0	0	1.21	0.4	0	0	0	0	0	0	0	0	--	--	--	--	--	--	--	--	--	--	--	--
c83932.graph_c0	33.98	31.32	37.77	34.36	29.88	24.9	29.94	28.24	35.1	28.55	25.78	29.81	27.93	30.37	31.77	30.02	47.63	44.59	38.73	43.65	39.72	39.45	41.21	44.46	46.48	58.57	44.09	49.71	--	Biological Process: formation of cytoplasmic translation initiation complex (GO:0001732);; Molecular Function: translation initiation factor activity (GO:0003743);; Cellular Component: eukaryotic translation initiation factor 3 complex (GO:0005852);; Cellular Component: eukaryotic 43S preinitiation complex (GO:0016282);; Molecular Function: translation initiation factor binding (GO:0031369);; Cel…	K03253|0.0e+00|sind:105167194|K03253 translation initiation factor 3 subunit B | (RefSeq) eukaryotic translation initiation factor 3 subunit B	Translation, ribosomal structure and biogenesis	Eukaryotic translation initiation factor eIF2A;; Anaphase-promoting complex subunit 4 WD40 domain;; RNA recognition motif. (a.k.a. RRM, RBD, or RNP domain)	Eukaryotic translation initiation factor 3 subunit B OS=Nicotiana tabacum OX=4097 GN=TIF3B1 PE=2 SV=1	Eukaryotic translation initiation factor 3 subunit B OS=Salvia splendens OX=180675 GN=EIF3B PE=3 SV=1	Translation, ribosomal structure and biogenesis	translation initiation factor 3 subunit B [Salvia splendens]	biological process: metabolic process (GO:0008152);; biological process: cellular process (GO:0009987);; biological process: cellular component organization or biogenesis (GO:0071840);; molecular function: binding (GO:0005488);; cellular component: cell (GO:0005623);; cellular component: macromolecular complex (GO:0032991);; cellular component: cell part (GO:0044464)	RNA transport (ko03013)	--
c27483.graph_c0	0	0	0	0	0	0	0	0	0	0	0	0	0	0	0	0	0	0	0	0	0	0	0	0	0	0	0	0	--	--	--	--	--	--	--	--	--	--	--	--
c48371.graph_c2	0	0	0	0	0	0	0	0	0	0	0	0	0	0.48	0	0.16	0	0	0	0	0	0	0	0	0	0	0	0	--	Molecular Function: oxidoreductase activity (GO:0016491);; Molecular Function: metal ion binding (GO:0046872);;	--	--	Common central domain of tyrosinase	--	Uncharacterized protein OS=Porphyra umbilicalis OX=2786 GN=BU14_0171s0005 PE=4 SV=1	--	hypothetical protein BB560_001698 [Smittium megazygosporum]	molecular function: catalytic activity (GO:0003824);; biological process: metabolic process (GO:0008152);; biological process: single-organism process (GO:0044699);; molecular function: binding (GO:0005488)	--	--
c19482.graph_c0	0	0	0	0	0	0	0	0	0	0	1.69	0.56	0	4.68	0	1.56	0	0	0	0	0	0	0	0	0	0	0	0	--	--	--	--	--	--	--	--	--	--	--	--
c50720.graph_c1	0	0	0	0	0	0	0.58	0.19	0	0	0.58	0.19	0.55	0.63	0	0.39	0	0	0	0	0	0	0	0	0	0	0	0	--	Molecular Function: protein kinase activity (GO:0004672);; Molecular Function: ATP binding (GO:0005524);; Cellular Component: integral component of membrane (GO:0016021);;	K13435|1.7e-06|sly:101268866|K13435 serine/threonine-protein kinase Pto | (RefSeq) Pto; serine/threonine protein kinase Pto	Signal transduction mechanisms	--	Receptor-like protein kinase HERK 1 OS=Arabidopsis thaliana OX=3702 GN=HERK1 PE=1 SV=1	Protein kinase domain-containing protein OS=Salvia splendens OX=180675 GN=Saspl_014341 PE=4 SV=1	Signal transduction mechanisms	hypothetical protein Saspl_014341 [Salvia splendens]	molecular function: catalytic activity (GO:0003824);; biological process: metabolic process (GO:0008152);; biological process: cellular process (GO:0009987);; molecular function: binding (GO:0005488);; cellular component: membrane (GO:0016020);; cellular component: membrane part (GO:0044425)	Plant-pathogen interaction (ko04626)	--
c43077.graph_c0	0	0	0	0	0	0	0	0	0	3.14	0	1.05	0	0	0	0	0	0	0	0	0	0	0	0	0	0	0	0	--	--	--	--	--	--	--	--	--	--	--	--
c64526.graph_c0	1.83	0.51	2.44	1.59	2.23	0.9	1.7	1.61	0.43	2.84	0.88	1.38	0.7	0.09	0.84	0.54	0.6	0.56	0.8	0.65	0.3	0.11	0.27	0.39	1.02	0.4	0.46	0.63	--	Cellular Component: ubiquitin ligase complex (GO:0000151);; Biological Process: mitotic cell cycle (GO:0000278);; Biological Process: mitotic cytokinesis (GO:0000281);; Biological Process: sister chromatid segregation (GO:0000819);; Biological Process: cytokinesis (GO:0000910);; Biological Process: cytokinesis by cell plate formation (GO:0000911);; Biological Process: blood vessel development (GO…	K13137|1.5e-08|mis:MICPUN_94652|K13137 serine-threonine kinase receptor-associated protein | (RefSeq) predicted protein	Signal transduction mechanisms	WD domain, G-beta repeat	DENN domain and WD repeat-containing protein SCD1 OS=Arabidopsis thaliana OX=3702 GN=SCD1 PE=1 SV=1	Uncharacterized protein OS=Salvia splendens OX=180675 GN=Saspl_041577 PE=4 SV=1	Signal transduction mechanisms	hypothetical protein Saspl_041577 [Salvia splendens]	cellular component: cell (GO:0005623);; cellular component: macromolecular complex (GO:0032991);; cellular component: cell part (GO:0044464);; biological process: cellular process (GO:0009987);; biological process: single-organism process (GO:0044699);; biological process: cellular component organization or biogenesis (GO:0071840);; biological process: multicellular organismal process (GO:0032501…	RNA transport (ko03013)	--
c107829.graph_c0	0	0	0	0	0	0	0	0	0	0	0	0	0	0	1.07	0.36	0	0	0	0	0	0	0	0	0	0	0	0	--	--	--	--	--	--	--	--	--	--	--	--
c15213.graph_c0	0	0	0	0	0	0	0	0	0	0	0	0	0	0	0	0	0	1.36	0	0.45	0	0	0	0	0	0	0	0	Posttranslational modification, protein turnover, chaperones	Molecular Function: ATP binding (GO:0005524);; Cellular Component: cytoplasm (GO:0005737);; Biological Process: protein folding (GO:0006457);; Molecular Function: unfolded protein binding (GO:0051082);;	K09495|2.8e-45|eus:EUTSA_v10020428mg|K09495 T-complex protein 1 subunit gamma | (RefSeq) hypothetical protein	Posttranslational modification, protein turnover, chaperones	TCP-1/cpn60 chaperonin family	T-complex protein 1 subunit gamma OS=Arabidopsis thaliana OX=3702 GN=CCT3 PE=1 SV=1	T-complex protein 1 subunit gamma OS=Camellia sinensis var. sinensis OX=542762 GN=TEA_026028 PE=3 SV=1	Posttranslational modification, protein turnover, chaperones	T-complex protein 1 subunit gamma [Camellia sinensis]	molecular function: binding (GO:0005488);; cellular component: cell (GO:0005623);; cellular component: cell part (GO:0044464);; biological process: cellular process (GO:0009987)	--	LOC114292891
c25058.graph_c0	0	0	0	0	0	0	0	0	0	0	0	0	0	0	0	0	0	0	0	0	0	0	0	0	0	0	0	0	--	--	--	--	--	--	--	--	SAGA-associated factor 29-like [Rhodamnia argentea]	--	--	LOC115744241
c91564.graph_c0	0	0	0	0	0	0	0	0	0	0	0	0	0	0	0	0	0	0	0	0	0	0	0	0	0	0	0	0	--	--	--	--	--	--	--	--	--	--	--	--
c81394.graph_c0	2.12	2.29	2.51	2.31	2.73	1.77	2.22	2.24	2.87	3.39	3.65	3.3	4.73	2.56	3.14	3.48	2.32	2.44	4.51	3.09	2.91	3.15	3.26	3.71	4.01	3.83	4.49	4.11	Cell wall/membrane/envelope biogenesis	Biological Process: GPI anchor biosynthetic process (GO:0006506);;	K03857|8.9e-154|oeu:111371760|K03857 phosphatidylinositol N-acetylglucosaminyltransferase subunit A [EC:2.4.1.198] | (RefSeq) phosphatidylinositol N-acetylglucosaminyltransferase subunit A	--	PIGA (GPI anchor biosynthesis);; Glycosyltransferase Family 4;; Glycosyl transferases group 1;; Glycosyl transferase 4-like domain;; Glycosyl transferases group 1;; Glycosyl transferases group 1	Phosphatidylinositol N-acetylglucosaminyltransferase subunit A OS=Arabidopsis thaliana OX=3702 GN=PIGA PE=2 SV=1	GlcNAc-PI synthesis protein OS=Salvia splendens OX=180675 GN=PIGA PE=4 SV=1	--	phosphatidylinositol glycan, class A [Salvia splendens]	biological process: metabolic process (GO:0008152);; biological process: cellular process (GO:0009987);; biological process: single-organism process (GO:0044699)	Glycosylphosphatidylinositol (GPI)-anchor biosynthesis (ko00563)	--
c59229.graph_c0	0.66	1.16	0.31	0.71	0	1.8	1.84	1.21	0.27	0.83	1.2	0.77	0.59	0	2.13	0.91	0.7	0	2.04	0.91	0.94	1.46	0.9	0.31	0.87	0	0.6	0.49	--	--	--	--	--	--	--	--	--	--	--	--
c42068.graph_c0	0	0	0	0	0	0	0	0	0	0	0	0	0	0	0	0	1.11	0	0	0.37	0	0	0	0	0	0	0	0	--	--	--	--	--	--	--	--	--	--	--	--
c46635.graph_c1	0.13	0	0.24	0.12	0	0	0.12	0.04	0.11	0.22	0.12	0.15	0.23	0	0	0.08	0	0.1	0.2	0.1	0.37	0	0.12	0	0	0.25	0	0.08	--	--	--	--	--	--	--	--	--	--	--	--
c79336.graph_c0	11.53	8.91	12.62	11.02	12.76	9.95	12.44	11.72	10.23	13.33	13.28	12.28	13.81	13.39	10.03	12.41	9.54	11.09	10.69	10.44	13.45	15.41	13.94	12.95	14.48	13.58	16.11	14.72	--	Biological Process: lipid catabolic process (GO:0016042);;	--	--	--	--	Uncharacterized protein OS=Salvia splendens OX=180675 GN=Saspl_026114 PE=4 SV=1	--	hypothetical protein Saspl_026114 [Salvia splendens]	biological process: metabolic process (GO:0008152);; biological process: single-organism process (GO:0044699)	--	--
c54340.graph_c0	0	0	0	0	0	0	0	0	0	0	0	0	0	0	0	0	0	0	0	0	0	0	0	0	0	0	0	0	--	--	--	--	--	--	--	--	--	--	--	--
c115058.graph_c0	0	0	0	0	0	0	0	0	0	0	0	0	0	0	0	0	0	0	0	0	0	2.51	0.84	0	0	0	0	0	--	--	--	--	Dock homology region 2	--	--	--	--	--	--	--
c109703.graph_c0	0	0	0	0	0	0	0	0	0	0	0	0	0	0	0	0	0	0	0.94	0.31	0	0	0	0	0	0	2.32	0.77	--	--	--	--	--	--	--	--	--	--	--	--
c79216.graph_c0	1.69	0.79	1.27	1.25	1.55	1.73	0.61	1.3	1.91	0.97	0.31	1.06	0.91	0.21	1	0.71	1.72	1	2.9	1.87	1.11	2.45	1.68	1.48	1.15	1.16	1.11	1.14	--	Biological Process: asymmetric cell division (GO:0008356);;	--	--	--	--	Uncharacterized protein OS=Salvia splendens OX=180675 GN=Saspl_031379 PE=4 SV=1	--	hypothetical protein Saspl_031379 [Salvia splendens]	biological process: cellular process (GO:0009987);; biological process: single-organism process (GO:0044699)	--	--
c54605.graph_c0	8.12	2.56	2.6	4.43	0	0	1.25	0.42	0	0	0	0	0	0	0	0	0.85	0	2.99	1.28	0	0	0.41	1.24	0	0	0	0	--	--	--	--	--	--	Uncharacterized protein OS=Salvia splendens OX=180675 GN=Saspl_015545 PE=3 SV=1	Function unknown	hypothetical protein Saspl_015545 [Salvia splendens]	--	--	--
c73734.graph_c0	13.92	9.45	18.23	13.87	16.73	10.69	8.99	12.14	11.59	11.54	6.02	9.72	7.88	6.75	8.86	7.83	12.93	9.1	23.09	15.04	19.86	11.84	14.55	11.96	11.82	8.76	9.64	10.07	--	Molecular Function: microtubule motor activity (GO:0003777);; Molecular Function: ATP binding (GO:0005524);; Cellular Component: microtubule (GO:0005874);; Biological Process: microtubule-based movement (GO:0007018);; Molecular Function: microtubule binding (GO:0008017);;	K10398|1.2e-154|sind:105170675|K10398 kinesin family member 11 | (RefSeq) kinesin-like protein KIN-5D	Cytoskeleton	--	Kinesin-like protein KIN-5D OS=Arabidopsis thaliana OX=3702 GN=KIN5D PE=3 SV=1	Kinesin-like protein OS=Salvia splendens OX=180675 GN=KIF11 PE=3 SV=1	Cytoskeleton	kinesin family member 11 [Salvia splendens]	molecular function: catalytic activity (GO:0003824);; molecular function: binding (GO:0005488);; cellular component: cell (GO:0005623);; cellular component: organelle (GO:0043226);; cellular component: organelle part (GO:0044422);; cellular component: cell part (GO:0044464);; cellular component: supramolecular complex (GO:0099080);; biological process: cellular process (GO:0009987);; biological p…	--	--
c106359.graph_c0	0	0	0	0	0	0	0	0	0	0	0	0	0	0	0	0	0	0	0	0	0	0	0	0	0	3.73	0	1.24	--	--	K06867|1.8e-17|qsu:112023107|K06867 uncharacterized protein | (RefSeq) uncharacterized protein LOC112023107	--	--	--	--	--	hypothetical protein AMS68_007309 [Peltaster fructicola]	--	--	--
c64942.graph_c0	2.04	1.65	2.58	2.09	2.12	1.36	1.58	1.69	1.92	1.11	2.92	1.98	3.84	3.29	2.63	3.25	2.03	2.08	3.22	2.44	3.49	3.53	4.04	5.11	2.53	2.53	3.7	2.92	--	--	--	--	--	--	Uncharacterized protein OS=Salvia splendens OX=180675 GN=Saspl_025694 PE=4 SV=1	--	uncharacterized protein LOC105158662 [Sesamum indicum]	--	--	LOC105158662
c102102.graph_c0	0	0	0	0	0	0.51	0	0.17	0	0.37	0.41	0.26	0	0	0.38	0.13	0	0	0	0	0	0	0	0	0.78	0	0	0.26	--	Biological Process: cytidine to uridine editing (GO:0016554);;	--	--	--	Multiple organellar RNA editing factor 8, chloroplastic/mitochondrial OS=Arabidopsis thaliana OX=3702 GN=MORF8 PE=1 SV=1	multiple organellar RNA editing factor 8, chloroplastic/mitochondrial-like OS=Nelumbo nucifera OX=4432 GN=LOC104612142 PE=4 SV=1	Function unknown	PREDICTED: multiple organellar RNA editing factor 8, chloroplastic/mitochondrial-like [Nelumbo nucifera]	biological process: metabolic process (GO:0008152);; biological process: cellular process (GO:0009987)	--	LOC104612142
c58221.graph_c0	0	0	0	0	0	0	0	0	0	0	0	0	0	0	0	0	0	0	0	0	0	0	0	0	0	0	0	0	--	--	--	--	--	--	--	--	--	--	--	--
c54015.graph_c0	0	0.59	0.21	0.27	0	0.11	0.59	0.23	0	0.19	0	0.06	0	0	0.29	0.1	0.16	0.09	0	0.08	0	0.1	0.03	0	0	0	0	0	--	--	--	--	--	--	--	--	--	--	--	--
c21648.graph_c0	0	0	0	0	0	0	0	0	0	0	0	0	0	0	0	0	0	1.55	0	0.52	0	0	0	0	0	0	0	0	--	--	--	--	--	--	--	--	--	--	--	--
c80890.graph_c1	3.76	4.85	4.1	4.24	3.43	5.04	6.08	4.85	3.78	3.57	6.6	4.65	6.91	4.93	4.27	5.37	3	3.53	4.65	3.73	4.65	6.61	6.59	8.5	3.91	5.98	4.36	4.75	--	Biological Process: immune system process (GO:0002376);; Cellular Component: cellular_component (GO:0005575);; Cellular Component: intracellular (GO:0005622);; Cellular Component: obsolete cell (GO:0005623);; Cellular Component: cytoplasm (GO:0005737);; Cellular Component: plasma membrane (GO:0005886);; Biological Process: response to stress (GO:0006950);; Biological Process: defense response (GO…	K13453|1.4e-76|sot:102596100|K13453 disease resistance protein | (RefSeq) putative late blight resistance protein homolog R1B-23	Signal transduction mechanisms	NB-ARC domain	Putative late blight resistance protein homolog R1A-10 OS=Solanum demissum OX=50514 GN=R1A-10 PE=3 SV=1	Apoptotic ATPase OS=Handroanthus impetiginosus OX=429701 GN=CDL12_21779 PE=4 SV=1	Signal transduction mechanisms	putative late blight resistance protein homolog R1B-16 [Sesamum indicum]	biological process: immune system process (GO:0002376);; cellular component: cell (GO:0005623);; cellular component: cell part (GO:0044464);; cellular component: membrane (GO:0016020);; biological process: response to stimulus (GO:0050896);; biological process: cellular process (GO:0009987);; biological process: signaling (GO:0023052);; biological process: single-organism process (GO:0044699);; b…	Plant-pathogen interaction (ko04626)	--
c33269.graph_c0	0	0	0	0	0	0	0	0	0	0	0	0	0	0	0	0	0	0.65	0	0.22	0	0	0	0	0.72	0	0	0.24	--	--	--	--	--	--	--	--	--	--	--	--
c76332.graph_c0	0.49	0.74	1.41	0.88	0.32	0.66	0.54	0.51	1.03	0.62	0.97	0.87	0.65	0.96	1.15	0.92	1.04	0.69	2	1.24	2.47	1.39	1.65	1.08	1.28	1.16	1.27	1.24	Amino acid transport and metabolism	Cellular Component: integral component of membrane (GO:0016021);; Molecular Function: transmembrane transporter activity (GO:0022857);;	K14638|1.1e-149|sind:105166309|K14638 solute carrier family 15 (peptide/histidine transporter), member 3/4 | (RefSeq) protein NRT1/ PTR FAMILY 4.5-like	Amino acid transport and metabolism	POT family;; POT family	Protein NRT1/ PTR FAMILY 4.6 OS=Arabidopsis thaliana OX=3702 GN=NPF4.6 PE=1 SV=1	H+/oligopeptide symporter OS=Handroanthus impetiginosus OX=429701 GN=CDL12_11273 PE=3 SV=1	Amino acid transport and metabolism	H+/oligopeptide symporter [Handroanthus impetiginosus]	cellular component: membrane (GO:0016020);; cellular component: membrane part (GO:0044425);; molecular function: transporter activity (GO:0005215);; biological process: localization (GO:0051179)	--	--
c960.graph_c1	0	0	0	0	0	0	0	0	0	0	0	0	0	0	0	0	0	1.31	0	0.44	0	0	0	0	0	1.66	0	0.55	--	--	--	Defense mechanisms	Bap31/Bap29 transmembrane region	--	--	--	--	--	--	--
c94147.graph_c0	0	0	0	0	0	0	0	0	0.76	0	0	0.25	0	0	1.49	0.5	0	0	0	0	0	0	0	0	0	0	0	0	--	--	--	--	--	--	--	--	--	--	--	--
c98186.graph_c0	0	0	0	0	0	0	0	0	0	0	0	0	0	0	0	0	0	0	0	0	0	0	0	0	0	0	0	0	--	--	--	--	--	--	--	--	--	--	--	--
c101197.graph_c0	0	0	0	0	0	0	0	0	0	0.56	0	0.19	0	0	0	0	0	0	0	0	0	0	0	0	0.6	0	0	0.2	--	--	--	--	--	--	--	--	--	--	--	--
c51456.graph_c0	0.57	0.18	0.36	0.37	0	0	0	0	0	0	0	0	0	0	0	0	0.28	0.47	0	0.25	0	0.67	0.22	0	1	0	0.18	0.39	--	Cellular Component: integral component of membrane (GO:0016021);;	--	--	PB1 domain	CBS domain-containing protein CBSCBSPB3 OS=Arabidopsis thaliana OX=3702 GN=CBSCBSPB3 PE=1 SV=1	Uncharacterized protein OS=Salvia splendens OX=180675 GN=Saspl_007912 PE=4 SV=1	Function unknown	hypothetical protein Saspl_007912 [Salvia splendens]	cellular component: membrane (GO:0016020);; cellular component: membrane part (GO:0044425)	--	--
c69837.graph_c0	7.67	9.9	9.78	9.12	4.11	5.31	14.77	8.06	8.07	8.9	13.17	10.05	9.65	20.93	9.42	13.33	14.28	20.35	13.17	15.93	12.9	17.01	16.2	18.7	15.16	27.95	18.54	20.55	Inorganic ion transport and metabolism	Cellular Component: integral component of membrane (GO:0016021);; Molecular Function: transmembrane transporter activity (GO:0022857);;	K02575|5.3e-246|sind:105156629|K02575 MFS transporter, NNP family, nitrate/nitrite transporter | (RefSeq) high affinity nitrate transporter 2.5	--	Major Facilitator Superfamily	High affinity nitrate transporter 2.5 OS=Arabidopsis thaliana OX=3702 GN=NRT2.5 PE=1 SV=1	Permease of the major facilitator superfamily OS=Handroanthus impetiginosus OX=429701 GN=CDL12_12454 PE=3 SV=1	Inorganic ion transport and metabolism	high affinity nitrate transporter 2.5 [Sesamum indicum]	cellular component: membrane (GO:0016020);; cellular component: membrane part (GO:0044425);; molecular function: transporter activity (GO:0005215);; biological process: localization (GO:0051179)	Nitrogen metabolism (ko00910)	LOC105156629
c54804.graph_c0	0.66	0.91	0	0.52	2.23	0.95	0.15	1.11	0	0.28	0.34	0.21	1.18	0.3	0.56	0.68	0.12	0.27	1.27	0.55	1.09	0.29	0.94	1.43	0.14	0.95	0.3	0.46	--	Cellular Component: integral component of membrane (GO:0016021);;	--	--	--	--	Uncharacterized protein OS=Salvia splendens OX=180675 GN=Saspl_022507 PE=4 SV=1	--	hypothetical protein Saspl_022507 [Salvia splendens]	cellular component: membrane (GO:0016020);; cellular component: membrane part (GO:0044425)	--	--
c105317.graph_c0	0	0	0	0	0	0	0	0	0	0.49	0	0.16	0	0.59	1.49	0.69	0	0	0	0	0	0	0	0	0	0	0	0	--	--	--	--	--	--	--	--	--	--	--	--
c101873.graph_c0	0	0	0	0	0	0	0	0	0	0	0	0	0	0	0	0	0	0	0	0	0	1.41	0.47	0	0	0	0	0	--	Molecular Function: molecular_function (GO:0003674);; Molecular Function: nucleic acid binding (GO:0003676);; Molecular Function: RNA binding (GO:0003723);; Molecular Function: binding (GO:0005488);; Cellular Component: cellular_component (GO:0005575);; Cellular Component: intracellular (GO:0005622);; Cellular Component: obsolete cell (GO:0005623);; Cellular Component: nucleus (GO:0005634);; Cell…	--	RNA processing and modification	--	--	--	RNA processing and modification	hypothetical protein PNEG_00822 [Pneumocystis murina B123]	molecular function: binding (GO:0005488);; cellular component: cell (GO:0005623);; cellular component: cell part (GO:0044464);; cellular component: organelle (GO:0043226);; cellular component: membrane-enclosed lumen (GO:0031974);; cellular component: organelle part (GO:0044422);; biological process: metabolic process (GO:0008152);; biological process: cellular process (GO:0009987);; biological p…	--	PNEG_00822
c100101.graph_c0	0	0	0	0	0	0	0	0	0	0	0	0	0	0	0	0	0	0.86	0.21	0.36	0	0.46	0.15	0	0	0	0	0	--	Cellular Component: lytic vacuole (GO:0000323);; Molecular Function: molecular_function (GO:0003674);; Molecular Function: catalytic activity (GO:0003824);; Molecular Function: threonine-type endopeptidase activity (GO:0004298);; Molecular Function: hydrolase activity, hydrolyzing O-glycosyl compounds (GO:0004553);; Molecular Function: alpha-mannosidase activity (GO:0004559);; Cellular Component:…	K01191|4.7e-19|brp:103837673|K01191 alpha-mannosidase [EC:3.2.1.24] | (RefSeq) probable alpha-mannosidase At5g66150	Carbohydrate transport and metabolism	Glycosyl hydrolases family 38 C-terminal domain	Alpha-mannosidase OS=Canavalia ensiformis OX=3823 PE=1 SV=1	Alpha-mannosidase OS=Brassica rapa subsp. pekinensis OX=51351 PE=3 SV=1	Carbohydrate transport and metabolism	lysosomal alpha-mannosidase-like [Rhodamnia argentea]	cellular component: cell (GO:0005623);; cellular component: organelle (GO:0043226);; cellular component: cell part (GO:0044464);; molecular function: catalytic activity (GO:0003824);; biological process: metabolic process (GO:0008152);; cellular component: macromolecular complex (GO:0032991);; biological process: single-organism process (GO:0044699);; biological process: cellular process (GO:0009…	Other glycan degradation (ko00511)	--
c3399.graph_c0	0	0	0	0	0	0.64	0	0.21	0	1.49	0	0.5	0.27	0	0	0.09	0	0	0	0	0	0	0	0	0	0	0.27	0.09	--	Cellular Component: integral component of membrane (GO:0016021);;	--	--	--	NADH dehydrogenase [ubiquinone] 1 beta subcomplex subunit 8, mitochondrial OS=Arabidopsis thaliana OX=3702 GN=At5g47570 PE=2 SV=1	Uncharacterized protein OS=Morus notabilis OX=981085 GN=L484_019050 PE=4 SV=1	Function unknown	NADH dehydrogenase [ubiquinone] 1 beta subcomplex subunit 8, mitochondrial [Morus notabilis]	cellular component: membrane (GO:0016020);; cellular component: membrane part (GO:0044425)	--	LOC21402004
c105933.graph_c0	0	0	1.73	0.58	0	0	0	0	0	0	0	0	1.52	0	0	0.51	0	0	0	0	0	0	0	0	0	0	0	0	--	--	--	--	--	--	--	--	--	--	--	--
c25631.graph_c1	0.26	0.73	0	0.33	0.24	0.28	0	0.17	0.65	0.44	0.75	0.61	0.47	0	1.58	0.68	0	0.85	0.2	0.35	2.99	1.39	1.96	1.51	0.23	0.51	0.96	0.57	--	--	--	--	--	--	--	--	--	--	--	--
c98430.graph_c0	0	0	0	0	0	0	0	0	0	0	0	0	0	4.73	0	1.58	0	0	0	0	0	0	0	0	0	0	0	0	--	--	--	--	--	--	--	--	--	--	--	--
c17423.graph_c0	0	0	0	0	0	0	0	0	0	0	0	0	0	0	0	0	0	0	0	0	0	0	0	0	0	0	0	0	--	--	--	--	--	--	--	--	--	--	--	--
c42014.graph_c0	0	0	0	0	0	0	0	0	0	0	0	0	0	0	0	0	0	0	1.34	0.45	0	0	0	0	0	0	0	0	--	--	--	--	--	--	--	--	--	--	--	--
c55899.graph_c1	0	0	0	0	0	0	0	0	0	0	0	0	0	0	0	0	0	0	0	0	0	0	0	0	0	0	0	0	--	--	--	--	--	--	--	--	--	--	--	--
c78347.graph_c0	0	0	0	0	0	0	0	0	0	0	0	0	0	0	0	0	0	0	0	0	0.3	0	0.1	0	0	0	0	0	--	Molecular Function: RNA-directed DNA polymerase activity (GO:0003964);;	K04125|1.5e-08|boe:106319842|K04125 gibberellin 2beta-dioxygenase [EC:1.14.11.13] | (RefSeq) gibberellin 2-beta-dioxygenase 7	General function prediction only	--	--	Putative reverse transcriptase domain-containing protein (Fragment) OS=Tanacetum cinerariifolium OX=118510 GN=Tci_823743 PE=4 SV=1	Replication, recombination and repair	PREDICTED: RNA-directed DNA polymerase homolog [Theobroma cacao]	molecular function: catalytic activity (GO:0003824);; biological process: metabolic process (GO:0008152);; biological process: cellular process (GO:0009987)	Diterpenoid biosynthesis (ko00904)	LOC108663438
c67948.graph_c0	2.01	3.78	3.54	3.11	3.07	4.42	8.18	5.22	3.13	5.65	4.18	4.32	3.34	3.42	3.39	3.38	2.36	2.49	1.81	2.22	0.98	2.68	2.91	5.07	5.12	3	1.26	3.13	--	Molecular Function: nucleic acid binding (GO:0003676);; Molecular Function: RNA-DNA hybrid ribonuclease activity (GO:0004523);;	K14175|2.4e-27|mcha:111010887|K14175 (3S,6E)-nerolidol synthase [EC:4.2.3.48] | (RefSeq) (3S,6E)-nerolidol synthase 1-like	General function prediction only	Reverse transcriptase-like;; RNase H	--	RNA-directed DNA polymerase OS=Helianthus annuus OX=4232 GN=HannXRQ_Chr03g0087361 PE=4 SV=1	Replication, recombination and repair	uncharacterized protein LOC113759694 [Coffea eugenioides]	molecular function: binding (GO:0005488);; molecular function: catalytic activity (GO:0003824);; biological process: metabolic process (GO:0008152);; biological process: cellular process (GO:0009987)	Sesquiterpenoid and triterpenoid biosynthesis (ko00909)	--
c20601.graph_c0	0	0	0	0	0	0	0	0	0	0	0	0	0	0	0	0	0.83	0	0	0.28	0	0	0	0	0	0	0	0	--	Cellular Component: proteasome complex (GO:0000502);; Molecular Function: threonine-type endopeptidase activity (GO:0004298);; Cellular Component: cellular_component (GO:0005575);; Cellular Component: intracellular (GO:0005622);; Cellular Component: obsolete cell (GO:0005623);; Cellular Component: nucleus (GO:0005634);; Cellular Component: cytoplasm (GO:0005737);; Cellular Component: cytosol (GO:…	K02736|7.4e-15|ccp:CHC_T00005811001|K02736 20S proteasome subunit beta 7 [EC:3.4.25.1] | (RefSeq) hypothetical protein	Posttranslational modification, protein turnover, chaperones	Proteasome subunit	--	Proteasome subunit beta OS=Helicosporidium sp. ATCC 50920 OX=1291522 GN=H632_c14p3 PE=3 SV=1	Posttranslational modification, protein turnover, chaperones	hypothetical protein SARC_17109, partial [Sphaeroforma arctica JP610]	cellular component: cell (GO:0005623);; cellular component: macromolecular complex (GO:0032991);; cellular component: cell part (GO:0044464);; molecular function: catalytic activity (GO:0003824);; biological process: metabolic process (GO:0008152);; cellular component: organelle (GO:0043226);; biological process: response to stimulus (GO:0050896);; biological process: cellular process (GO:0009987)	Proteasome (ko03050)	SARC_17109
c73167.graph_c0	19.28	17.11	21.12	19.17	16.37	25.16	20.11	20.55	18.13	15.77	19.5	17.8	16.38	21.36	16.94	18.23	13.38	16.5	16.75	15.54	20.13	18.94	19.95	20.77	18.89	17.97	21.84	19.57	Lipid transport and metabolism	Cellular Component: integral component of membrane (GO:0016021);; Molecular Function: hydrolase activity (GO:0016787);;	K15889|3.8e-180|sind:105156433|K15889 prenylcysteine alpha-carboxyl methylesterase [EC:3.1.1.-] | (RefSeq) probable isoprenylcysteine alpha-carbonyl methylesterase ICMEL2 isoform X1	General function prediction only	alpha/beta hydrolase fold;; Carboxylesterase family;; Prolyl oligopeptidase family	Probable isoprenylcysteine alpha-carbonyl methylesterase ICMEL1 OS=Arabidopsis thaliana OX=3702 GN=ICMEL1 PE=2 SV=1	Prenylcysteine alpha-carboxyl methylesterase OS=Salvia splendens OX=180675 GN=PCME PE=4 SV=1	Lipid transport and metabolism	prenylcysteine alpha-carboxyl methylesterase [Salvia splendens]	cellular component: membrane (GO:0016020);; cellular component: membrane part (GO:0044425);; molecular function: catalytic activity (GO:0003824)	Terpenoid backbone biosynthesis (ko00900)	--
c64058.graph_c0	0	0	0	0	0	0	0	0	4.19	0	0	1.4	0	0	0	0	2.32	0	0	0.77	0	0	0	0	0	0	0	0	--	--	--	--	--	--	--	--	--	--	--	--
c22283.graph_c0	0	0.85	0	0.28	0	0	0	0	0	0	0	0	0	0	0	0	0	0	0	0	0	0	0	0	0	0	0	0	--	--	--	--	--	--	--	--	--	--	--	--
c77161.graph_c1	1048.14	1148.37	813.16	1003.22	1005.24	1079.33	816.93	967.17	812.36	873.88	868.11	851.45	1065.26	1030.5	1085.83	1060.53	856.11	813.3	1057.47	908.96	772.68	977.77	826.26	728.33	813.96	776.35	740.45	776.92	--	--	--	--	--	--	--	--	--	--	--	--
c56580.graph_c0	0	1.23	1.87	1.03	0.6	0.81	0	0.47	0	0.55	2.44	1	1.74	0	2.22	1.32	1.77	1.06	0	0.94	1.24	2.35	1.81	1.85	1.18	1.32	0.6	1.03	--	--	--	--	--	--	--	--	--	--	--	--
c16751.graph_c0	0	0.58	0	0.19	0	0	0	0	0	0.51	0	0.17	0	0	0	0	0	0	0	0	0	1.1	0.37	0	0	0	0	0	--	--	--	--	--	--	Uncharacterized protein (Fragment) OS=Glycine soja OX=3848 GN=glysoja_025026 PE=4 SV=1	--	PREDICTED: uncharacterized protein LOC104908756 [Beta vulgaris subsp. vulgaris]	--	--	LOC104908756
c44104.graph_c0	0	0	0	0	0	0	0	0	0	0	0	0	0	0.38	0.34	0.24	0	0	0	0	0	0	0	0	0.35	0	0.73	0.36	--	--	--	--	--	--	--	--	--	--	--	--
c75954.graph_c0	2.49	1.91	3.05	2.48	2.09	3.03	2.37	2.5	2.77	2.15	3.35	2.76	3.1	2.74	3.07	2.97	3.01	2.52	2.96	2.83	2.42	3.79	3.05	2.94	2.79	3.14	2.74	2.89	--	Molecular Function: nucleic acid binding (GO:0003676);; Molecular Function: aspartic-type endopeptidase activity (GO:0004190);; Biological Process: DNA integration (GO:0015074);;	K12349|1.6e-91|ccaj:109806181|K12349 neutral ceramidase [EC:3.5.1.23] | (RefSeq) neutral ceramidase-like	General function prediction only	Reverse transcriptase (RNA-dependent DNA polymerase);; RNase H-like domain found in reverse transcriptase;; RNase H-like domain found in reverse transcriptase;; Integrase zinc binding domain;; Retrotransposon gag protein;; Retroviral aspartyl protease;; Aspartyl protease	Uncharacterized mitochondrial protein AtMg00860 OS=Arabidopsis thaliana OX=3702 GN=AtMg00860 PE=4 SV=1	Transposon Ty3-G Gag-Pol polyprotein OS=Vitis vinifera OX=29760 GN=TY3B-G_360 PE=4 SV=1	Replication, recombination and repair	Transposon Ty3-G Gag-Pol polyprotein [Vitis vinifera]	molecular function: binding (GO:0005488);; molecular function: catalytic activity (GO:0003824);; biological process: metabolic process (GO:0008152);; biological process: cellular process (GO:0009987)	Sphingolipid metabolism (ko00600)	--
c102897.graph_c0	0	0	0	0	0	0	0	0	1.84	0	0	0.61	0	0	0	0	0	1.15	0	0.38	0	0	0	0	0	0	0	0	--	--	--	--	--	--	--	--	--	--	--	--
c32125.graph_c1	0	0.91	0	0.3	0	0	0	0	0	0	0	0	0	0	0	0	0	0	0	0	0	0	0	0	0	0	0	0	--	--	--	--	--	--	--	--	--	--	--	--
c113445.graph_c0	0	0	0	0	0	0	0	0	0	0	0	0	0	0	0	0	0	0	0	0	0	0	0	0	0	0	0	0	--	--	--	--	--	--	--	--	--	--	--	--
c87987.graph_c0	0	0	0	0	0.65	0	0	0.22	0	0	0	0	0.63	0	0.6	0.41	1.42	0	0	0.47	0	0	0	0	0	0	0	0	--	--	--	--	--	--	--	--	--	--	--	--
c100951.graph_c0	0	0	0	0	0	0	0	0	0	0	0	0	0	0	0	0	1.19	0	0	0.4	0	0	0	0	0	0	0	0	--	--	--	--	--	--	--	--	--	--	--	--
c68143.graph_c1	17.71	19.87	18.16	18.58	22.31	15.9	22.25	20.15	22.34	19.9	23.73	21.99	33.32	12.28	25.08	23.56	17.89	17.53	20.75	18.72	23.13	25.81	21.86	16.63	20.35	22.02	26.45	22.94	--	--	--	--	--	--	--	--	--	--	--	--
c103460.graph_c0	0	0	0	0	0	0	0	0	0	0	0	0	2.66	0	0	0.89	0	0	0	0	0	0	0	0	0	0	0	0	--	Molecular Function: structural constituent of ribosome (GO:0003735);; Cellular Component: ribosome (GO:0005840);; Biological Process: translation (GO:0006412);;	K02991|1.2e-26|eus:EUTSA_v10026073mg|K02991 small subunit ribosomal protein S6e | (RefSeq) hypothetical protein	Translation, ribosomal structure and biogenesis	Ribosomal protein S6e	40S ribosomal protein S6-1 OS=Arabidopsis thaliana OX=3702 GN=RPS6A PE=1 SV=2	40S ribosomal protein S6 OS=Pythium insidiosum OX=114742 GN=PINS_003254 PE=3 SV=1	Translation, ribosomal structure and biogenesis	40S ribosomal protein S6-b [Moesziomyces antarcticus]	molecular function: structural molecule activity (GO:0005198);; cellular component: cell (GO:0005623);; cellular component: macromolecular complex (GO:0032991);; cellular component: organelle (GO:0043226);; cellular component: cell part (GO:0044464);; biological process: metabolic process (GO:0008152);; biological process: cellular process (GO:0009987)	Ribosome (ko03010)	PAN0_001c0196
c25198.graph_c0	0	0	0	0	0	0	0	0	0	0	0	0	1.02	0.73	0.65	0.8	0	0	0	0	0	0.34	0.11	0	0	0.38	0	0.13	--	Molecular Function: peroxidase activity (GO:0004601);; Biological Process: response to oxidative stress (GO:0006979);; Molecular Function: heme binding (GO:0020037);; Molecular Function: metal ion binding (GO:0046872);;	K13116|1.2e-20|pda:103723897|K13116 ATP-dependent RNA helicase DDX41 [EC:3.6.4.13] | (RefSeq) DEAD-box ATP-dependent RNA helicase 35-like	General function prediction only	--	--	Peroxidase OS=Salvia splendens OX=180675 GN=Saspl_027492 PE=3 SV=1	Replication, recombination and repair	hypothetical protein Saspl_027492 [Salvia splendens]	molecular function: catalytic activity (GO:0003824);; molecular function: antioxidant activity (GO:0016209);; biological process: metabolic process (GO:0008152);; biological process: cellular process (GO:0009987);; biological process: single-organism process (GO:0044699);; biological process: response to stimulus (GO:0050896);; biological process: detoxification (GO:0098754);; molecular function:…	--	--
c75108.graph_c0	0	0	0	0	0	0	0	0	0	2.33	0	0.78	0	0	0	0	0	0.56	1.06	0.54	0	0	0.22	0.66	1.88	0	4.48	2.12	--	--	--	--	--	--	--	--	--	--	--	--
c31749.graph_c0	0	0	0	0	0	0	0	0	0	0	0	0	0	0	0	0	0	0	0	0	0	0	0	0	0	0.36	0	0.12	--	--	--	--	--	--	--	--	--	--	--	--
c92890.graph_c0	0	0	0	0	0	0	0	0	0	0	0	0	0	1.85	0	0.62	0	0	2.31	0.77	0	0	0	0	0	0	0	0	--	--	--	--	--	--	--	--	--	--	--	--
c77631.graph_c0	0.36	3.19	0.55	1.37	0.45	0.59	0.34	0.46	0.39	0.72	0.48	0.53	1.75	0.52	0.83	1.03	0.74	0.74	1.03	0.84	0.8	0.6	0.68	0.63	0.52	0.56	0.41	0.5	--	--	--	--	--	--	--	--	--	--	--	--
c87260.graph_c0	1.58	0	0	0.53	0	0	0	0	0	0	0	0	0	0	0	0	0	0	1.16	0.39	0	0	0	0	0	0	2.87	0.96	--	--	--	--	--	--	--	--	--	--	--	--
c72436.graph_c0	55.96	59.09	67.31	60.79	61.43	55.64	45.24	54.1	66.72	54.96	43.99	55.22	56.04	48.35	53.52	52.64	75.79	72.03	88.42	78.75	80.81	76.84	76.58	72.09	81.45	65.22	62.23	69.63	Nucleotide transport and metabolism	Cellular Component: integral component of membrane (GO:0016021);; Molecular Function: transmembrane transporter activity (GO:0022857);;	K14611|2.0e-102|nsy:104231657|K14611 solute carrier family 23 (nucleobase transporter), member 1 | (RefSeq) nucleobase-ascorbate transporter 6	Nucleotide transport and metabolism	Permease family	Nucleobase-ascorbate transporter 6 OS=Arabidopsis thaliana OX=3702 GN=NAT6 PE=2 SV=2	Solute carrier family 23 (Nucleobase transporter), member 1/2 OS=Salvia splendens OX=180675 GN=SLC23A1_2 PE=4 SV=1	Nucleotide transport and metabolism	nucleobase-ascorbate transporter 6 [Sesamum indicum]	cellular component: membrane (GO:0016020);; cellular component: membrane part (GO:0044425);; molecular function: transporter activity (GO:0005215);; biological process: localization (GO:0051179)	--	--
c60761.graph_c1	0.32	0.57	0.86	0.58	0.07	0.39	0.67	0.38	0.99	0.51	0.85	0.78	0.64	0.5	1.06	0.73	0.23	0.59	1.13	0.65	0.53	0.72	0.52	0.31	0.53	0.39	0.93	0.62	--	--	--	--	Trypsin-like peptidase domain	--	Uncharacterized protein OS=Erythranthe guttata OX=4155 GN=MIMGU_mgv1a011309mg PE=4 SV=1	--	PREDICTED: uncharacterized protein LOC105970241 [Erythranthe guttata]	--	--	LOC105970241
c86599.graph_c0	0.75	0.7	1.44	0.96	0.09	0.73	1.15	0.66	0.78	0.72	1.75	1.08	0.6	1.19	1.57	1.12	0.84	2.1	1.28	1.41	1.45	1	1.31	1.47	2.3	1.63	0.52	1.48	--	--	--	--	--	--	--	--	--	--	--	--
c111528.graph_c0	0	0	0	0	0	0	0	0	0	0	0	0	0	0	0	0	0	0	0	0	0	0	0	0	3.98	0	0	1.33	--	Cellular Component: integral component of membrane (GO:0016021);;	K17279|2.7e-30|qsu:112001288|K17279 receptor expression-enhancing protein 5/6 | (RefSeq) protein yop1-like	Intracellular trafficking, secretion, and vesicular transport	TB2/DP1, HVA22 family	HVA22-like protein a OS=Arabidopsis thaliana OX=3702 GN=HVA22A PE=2 SV=1	HVA22-like protein (Fragment) OS=Anthurium amnicola OX=1678845 GN=yop-1_1 PE=3 SV=1	--	Protein yop1 [Rachicladosporium sp. CCFEE 5018]	cellular component: membrane (GO:0016020);; cellular component: membrane part (GO:0044425)	--	--
c79378.graph_c3	32.88	26.98	49.41	36.42	36.79	41.75	33.78	37.44	32.11	21.97	24.5	26.19	35.31	24.35	22.19	27.28	23.78	21.76	35.47	27	31.93	32.35	31	28.72	26.63	23.84	20.65	23.71	--	Molecular Function: methyltransferase activity (GO:0008168);; Cellular Component: integral component of membrane (GO:0016021);;	--	--	Methyltransferase domain;; Methyltransferase domain	--	Methyltransf_11 domain-containing protein OS=Salvia splendens OX=180675 GN=Saspl_033976 PE=4 SV=1	Function unknown	hypothetical protein Saspl_033976 [Salvia splendens]	molecular function: catalytic activity (GO:0003824);; biological process: metabolic process (GO:0008152);; cellular component: membrane (GO:0016020);; cellular component: membrane part (GO:0044425)	--	--
c16304.graph_c0	0	0	0	0	0	0	0	0	0	0	0	0	0	0	0	0	0	0	0	0	0.39	0	0.13	0	0.73	0.82	0	0.52	--	--	K00799|5.2e-50|vvi:100261799|K00799 glutathione S-transferase [EC:2.5.1.18] | (RefSeq) probable glutathione S-transferase parC	Posttranslational modification, protein turnover, chaperones	Glutathione S-transferase, C-terminal domain;; Glutathione S-transferase, C-terminal domain	Probable glutathione S-transferase parC OS=Nicotiana tabacum OX=4097 GN=PARC PE=2 SV=1	Uncharacterized protein OS=Camellia sinensis var. sinensis OX=542762 GN=TEA_009787 PE=4 SV=1	Posttranslational modification, protein turnover, chaperones	probable glutathione S-transferase [Camellia sinensis]	--	Glutathione metabolism (ko00480)	LOC114262549
c115104.graph_c0	0	2.72	0	0.91	0	0	0	0	0	0	0	0	0	0	0	0	0	0	0	0	0	0	0	0	0	0	0	0	--	--	--	--	--	--	--	--	--	--	--	--
c107288.graph_c0	0	0	0	0	0	0	0	0	0	0	0	0	0	0.85	0	0.28	0	0	0	0	0	0	0	0	0	0	0	0	--	--	K03950|1.1e-07|thj:104799320|K03950 NADH dehydrogenase (ubiquinone) 1 alpha subcomplex subunit 6 | (RefSeq) NADH dehydrogenase [ubiquinone] 1 alpha subcomplex subunit 6-like	Energy production and conversion	Complex 1 protein (LYR family)	--	NADH-ubiquinone oxidoreductase 14. subunit (Fragment) OS=Anthurium amnicola OX=1678845 GN=nuo-14.8_1 PE=3 SV=1	--	NADH dehydrogenase, alpha subcomplex, subunit 6 [Gigaspora margarita]	--	Oxidative phosphorylation (ko00190)	--
c71556.graph_c0	31.45	30.45	33.57	31.82	31.15	28.52	20.44	26.7	32.18	33.7	23.03	29.64	33.22	26.9	33.93	31.35	43.05	38.89	40.83	40.92	34.45	31.68	35.72	41.03	34.89	35.56	34.56	35	--	Cellular Component: mitochondrion (GO:0005739);; Biological Process: mitochondrial electron transport, NADH to ubiquinone (GO:0006120);;	K03952|3.5e-53|sind:105161137|K03952 NADH dehydrogenase (ubiquinone) 1 alpha subcomplex subunit 8 | (RefSeq) NADH dehydrogenase [ubiquinone] 1 alpha subcomplex subunit 8-B-like isoform X2	Energy production and conversion	CHCH domain;; CHCH-CHCH-like Cx9C, IMS import disulfide relay-system,	NADH dehydrogenase [ubiquinone] 1 alpha subcomplex subunit 8-B OS=Arabidopsis thaliana OX=3702 GN=At5g18800 PE=1 SV=1	NADH dehydrogenase (Ubiquinone) 1 alpha subcomplex subunit 8 OS=Salvia splendens OX=180675 GN=NDUFA8 PE=3 SV=1	Energy production and conversion	NADH dehydrogenase (ubiquinone) 1 alpha subcomplex subunit 8 [Salvia splendens]	cellular component: cell (GO:0005623);; cellular component: organelle (GO:0043226);; cellular component: cell part (GO:0044464);; biological process: metabolic process (GO:0008152);; biological process: cellular process (GO:0009987);; biological process: single-organism process (GO:0044699)	Oxidative phosphorylation (ko00190)	--
c50413.graph_c0	1.08	0	0	0.36	0	0	0	0	0	0	0	0	0	0.54	0	0.18	0	0	0	0	0	0	0	0	0	0	0	0	--	--	--	--	--	--	--	--	--	--	--	--
c36624.graph_c0	0	0	0	0	0	0	0	0	0	0	0	0	0.74	0	0	0.25	0	0	0	0	0	0	0.45	1.34	0	0	0	0	--	--	--	--	--	--	--	--	--	--	--	--
c61486.graph_c2	0.28	0.79	0.53	0.53	0	0	0	0	0	0.59	0	0.2	1.02	0.26	0	0.43	0	0	0	0	0	0.25	0.08	0	0.99	0	0	0.33	--	--	--	--	--	--	--	--	--	--	--	--
c96820.graph_c0	0	0	0	0	0	0	0	0	0	0	0	0	0	0	0	0	0	0	2.58	0.86	0	0	0	0	0	0	0	0	--	--	--	--	--	--	--	--	--	--	--	--
c42832.graph_c0	0	0	0	0	0	0	0.99	0.33	0	0	0	0	0	0	0	0	0	0	1.22	0.41	0	0	0	0	0	0	0	0	Amino acid transport and metabolism	Molecular Function: glycine dehydrogenase (decarboxylating) activity (GO:0004375);; Cellular Component: mitochondrion (GO:0005739);; Biological Process: glycine catabolic process (GO:0006546);;	K00281|1.3e-25|ccaj:109796115|K00281 glycine dehydrogenase [EC:1.4.4.2] | (RefSeq) glycine dehydrogenase (decarboxylating), mitochondrial-like	Amino acid transport and metabolism	Glycine cleavage system P-protein	Glycine dehydrogenase (decarboxylating), mitochondrial OS=Pisum sativum OX=3888 GN=GDCSP PE=1 SV=1	Glycine cleavage system P protein OS=Hordeum vulgare subsp. vulgare OX=112509 PE=2 SV=1	Amino acid transport and metabolism	glycine dehydrogenase (decarboxylating), mitochondrial-like [Rhodamnia argentea]	molecular function: catalytic activity (GO:0003824);; biological process: metabolic process (GO:0008152);; biological process: single-organism process (GO:0044699);; cellular component: cell (GO:0005623);; cellular component: organelle (GO:0043226);; cellular component: cell part (GO:0044464);; biological process: cellular process (GO:0009987)	Glycine, serine and threonine metabolism (ko00260);; Glyoxylate and dicarboxylate metabolism (ko00630);; Carbon metabolism (ko01200)	--
c49176.graph_c0	0	1.33	0.9	0.74	0	0.56	0	0.19	0.8	1.19	0.89	0.96	0.42	0	1.21	0.54	0.66	0.38	0	0.35	0.45	0.42	1.49	3.6	1.27	0.47	0.44	0.73	--	--	--	--	--	--	--	--	--	--	--	--
c108758.graph_c0	0	0	0	0	0	0	0	0	0	0	0	0	0	0	0	0	0	0.93	0	0.31	0	0	0	0	0	0	0	0	--	Molecular Function: DNA binding (GO:0003677);; Biological Process: defense response (GO:0006952);; Cellular Component: integral component of membrane (GO:0016021);;	K21596|1.6e-36|vvi:100247418|K21596 calmodulin-binding transcription activator | (RefSeq) calmodulin-binding transcription activator 3	Function unknown	--	Calmodulin-binding transcription activator 3 OS=Arabidopsis thaliana OX=3702 GN=CAMTA3 PE=1 SV=1	Uncharacterized protein OS=Camellia sinensis var. sinensis OX=542762 GN=TEA_011189 PE=3 SV=1	Posttranslational modification, protein turnover, chaperones	hypothetical protein HYC85_005018 [Camellia sinensis]	molecular function: binding (GO:0005488);; biological process: response to stimulus (GO:0050896);; cellular component: membrane (GO:0016020);; cellular component: membrane part (GO:0044425)	--	--
c51272.graph_c0	0	0	0	0	0	0	0	0	0	0	1.89	0.63	0	0	0	0	0	0	0	0	0	0	0	0	0	0	0	0	--	--	--	--	--	--	--	--	--	--	--	--
c41410.graph_c1	0.35	0.32	0.21	0.29	0	0	0	0	0.37	0	0	0.12	0.4	0.33	0.3	0.34	0	0.37	0.18	0.18	0	0	0.11	0.33	0	0	0.99	0.33	--	--	--	--	--	--	--	--	--	--	--	--
c1368.graph_c0	0	0	0	0	0	0	0	0	0	0	0	0	0	0	0	0	0	0	0	0	0	0	0	0	0	0	0	0	--	Molecular Function: molecular_function (GO:0003674);; Molecular Function: nucleic acid binding (GO:0003676);; Molecular Function: RNA binding (GO:0003723);; Molecular Function: double-stranded RNA binding (GO:0003725);; Molecular Function: catalytic activity (GO:0003824);; Molecular Function: nuclease activity (GO:0004518);; Molecular Function: endonuclease activity (GO:0004519);; Molecular Funct…	--	--	--	--	Pentatricopeptide repeat protein OS=Salvia miltiorrhiza OX=226208 PE=2 SV=1	Function unknown	pentatricopeptide repeat protein [Salvia miltiorrhiza]	molecular function: binding (GO:0005488);; molecular function: catalytic activity (GO:0003824);; biological process: metabolic process (GO:0008152);; biological process: cellular process (GO:0009987);; cellular component: cell (GO:0005623);; cellular component: cell part (GO:0044464);; cellular component: organelle (GO:0043226);; biological process: biological regulation (GO:0065007);; biological…	--	--
c75332.graph_c2	0	0	0	0	0	0	0	0	0	0	0	0	0	0	0	0	0	0.3	0	0.1	0	0.66	0.22	0	0	0.73	0.34	0.36	--	--	--	--	--	--	--	--	--	--	--	--
c15932.graph_c1	0	0	0	0	0	0	0	0	0	0	0	0	0	0	0	0	0	0	0	0	0	0	0	0	0	0	0	0	--	--	--	--	--	--	--	--	--	--	--	--
c95142.graph_c0	0	0	0	0	0	0	0	0	0	0	0	0	0	2.39	0	0.8	0	0	0	0	0	0	0	0	0	0	0	0	Signal transduction mechanisms	--	--	--	Phosphotransferase enzyme family	--	APH domain-containing protein OS=Fragilariopsis cylindrus CCMP1102 OX=635003 GN=FRACYDRAFT_247871 PE=4 SV=1	Function unknown	hypothetical protein FRACYDRAFT_247871 [Fragilariopsis cylindrus CCMP1102]	--	--	--
c63637.graph_c0	0.5	0.94	0	0.48	2.02	2.37	0.93	1.77	0.51	1.26	0	0.59	0	0	0	0	0.34	0.4	0.92	0.55	0.48	0	0.16	0	0	0	0	0	--	--	--	--	--	--	--	--	--	--	--	--
c33669.graph_c0	0	0	0	0	0	0	0	0	0	0	0	0	0	0	0	0	0	0	0	0	0	0	0	0	0	0	0	0	--	--	--	Posttranslational modification, protein turnover, chaperones	--	--	--	--	26S proteasome regulatory subunit 8 [Rhodamnia argentea]	--	--	--
c68278.graph_c1	1.08	0.64	5.52	2.41	1.92	1.77	4.47	2.72	3.59	3.02	2.07	2.89	1.64	2.17	1.43	1.75	4.35	3.7	7.3	5.12	3.54	6.29	4.23	2.86	3.04	1.86	3.03	2.64	--	Cellular Component: endoplasmic reticulum membrane (GO:0005789);; Biological Process: intracellular protein transport (GO:0006886);; Biological Process: endoplasmic reticulum to Golgi vesicle-mediated transport (GO:0006888);; Cellular Component: integral component of membrane (GO:0016021);; Biological Process: protein localization to endoplasmic reticulum exit site (GO:0070973);;	K14009|9.3e-77|sind:105170143|K14009 B-cell receptor-associated protein 31 | (RefSeq) uncharacterized protein LOC105170143	Defense mechanisms	--	--	Endoplasmic reticulum transmembrane protein OS=Handroanthus impetiginosus OX=429701 GN=CDL12_01061 PE=3 SV=1	Defense mechanisms	B-cell receptor-associated protein [Handroanthus impetiginosus]	cellular component: cell (GO:0005623);; cellular component: membrane (GO:0016020);; cellular component: organelle (GO:0043226);; cellular component: organelle part (GO:0044422);; cellular component: membrane part (GO:0044425);; cellular component: cell part (GO:0044464);; biological process: localization (GO:0051179)	Protein processing in endoplasmic reticulum (ko04141)	--
c74497.graph_c0	1.34	1.45	1.64	1.48	1.05	0.39	2.74	1.39	1.24	0.33	1.93	1.17	0.41	0.51	0.73	0.55	2.18	2.54	1.5	2.07	1.85	1.11	1.9	2.74	2.36	3.33	2.14	2.61	--	Biological Process: mitochondrial RNA metabolic process (GO:0000959);; Molecular Function: molecular_function (GO:0003674);; Molecular Function: nucleic acid binding (GO:0003676);; Molecular Function: RNA binding (GO:0003723);; Molecular Function: mRNA binding (GO:0003729);; Molecular Function: catalytic activity (GO:0003824);; Molecular Function: nuclease activity (GO:0004518);; Molecular Functi…	--	General function prediction only	PPR repeat family;; PPR repeat;; PPR repeat;; Pentatricopeptide repeat domain;; Pentacotripeptide-repeat region of PRORP	Pentatricopeptide repeat-containing protein At4g36680, mitochondrial OS=Arabidopsis thaliana OX=3702 GN=At4g36680 PE=1 SV=1	Pentatricopeptide repeat protein OS=Salvia miltiorrhiza OX=226208 PE=2 SV=1	Amino acid transport and metabolism	pentatricopeptide repeat protein [Salvia miltiorrhiza]	biological process: metabolic process (GO:0008152);; biological process: cellular process (GO:0009987);; molecular function: binding (GO:0005488);; molecular function: catalytic activity (GO:0003824);; cellular component: cell (GO:0005623);; cellular component: cell part (GO:0044464);; cellular component: organelle (GO:0043226);; cellular component: membrane (GO:0016020)	--	--
c61197.graph_c0	0	0	0	0	0	0	0	0	0	0	0	0	0	0	0	0	0	0	0	0	0	0	0	0	0	0	1.61	0.54	--	--	--	--	--	--	--	--	--	--	--	--
c78603.graph_c0	15.35	19.7	13.81	16.29	9.33	16.25	18.81	14.8	21.1	16.48	13.78	17.12	18.73	12.45	22.2	17.79	18.23	20.99	28.79	22.67	26.86	31.8	28.06	25.53	29.02	22.43	20.4	23.95	--	Biological Process: metal ion transport (GO:0030001);; Molecular Function: metal ion binding (GO:0046872);;	--	--	--	--	HMA domain-containing protein OS=Salvia splendens OX=180675 GN=Saspl_043144 PE=4 SV=1	Inorganic ion transport and metabolism	hypothetical protein Saspl_043144 [Salvia splendens]	biological process: localization (GO:0051179);; molecular function: binding (GO:0005488)	--	--
c14596.graph_c0	0	0	0	0	0	0	0	0	0	0	0	0	0	0	0	0	0	0	0	0	0	0	0	0	0	0	0	0	--	--	--	--	--	--	--	--	--	--	--	--
c84463.graph_c2	30.63	29.86	38.59	33.03	33.19	30.72	32.23	32.05	33.52	28.14	30.78	30.81	31.09	32.76	33.34	32.4	35.59	33.39	37.38	35.45	37.07	38.75	38.97	41.08	35.02	38.62	38.19	37.28	--	Cellular Component: nucleus (GO:0005634);; Biological Process: protein import into nucleus (GO:0006606);; Molecular Function: Ran GTPase binding (GO:0008536);; Cellular Component: integral component of membrane (GO:0016021);;	K18752|0.0e+00|sind:105164146|K18752 transportin-1 | (RefSeq) transportin-1-like isoform X2	--	HEAT-like repeat;; HEAT repeat;; HEAT repeats;; Importin-beta N-terminal domain;; CLASP N terminal;; Vacuolar 14 Fab1-binding region;; Armadillo/beta-catenin-like repeat	Transportin-1 OS=Arabidopsis thaliana OX=3702 GN=TRN1 PE=1 SV=1	Transportin-2 OS=Salvia splendens OX=180675 GN=TNPO2 PE=4 SV=1	--	transportin-2 [Salvia splendens]	cellular component: cell (GO:0005623);; cellular component: organelle (GO:0043226);; cellular component: cell part (GO:0044464);; biological process: single-organism process (GO:0044699);; biological process: localization (GO:0051179);; molecular function: binding (GO:0005488);; cellular component: membrane (GO:0016020);; cellular component: membrane part (GO:0044425)	--	--
c67355.graph_c0	4.81	7.09	7.18	6.36	4.36	2.72	7.84	4.97	8.42	5.37	6.8	6.86	3.93	3.08	8.55	5.19	9.22	4.54	7.73	7.16	8.37	7.12	8.46	9.9	4.25	3.94	2.2	3.46	--	Molecular Function: RNA binding (GO:0003723);;	K13157|3.0e-29|cann:107840515|K13157 U11/U12 small nuclear ribonucleoprotein 65 kDa protein | (RefSeq) U11/U12 small nuclear ribonucleoprotein 65 kDa protein	--	--	--	U11/U12 small nuclear ribonucleoprotein 65 kDa protein OS=Salvia splendens OX=180675 GN=RNPC3 PE=4 SV=1	RNA processing and modification	U11/U12 small nuclear ribonucleoprotein 65 kDa protein [Salvia splendens]	molecular function: binding (GO:0005488)	--	--
c52819.graph_c0	0.26	0	0	0.09	0.24	0	0	0.08	0.44	0	0.25	0.23	0.24	0.98	1.13	0.78	0.38	0	0	0.13	0	0.46	0.32	0.5	0.23	0.25	0.72	0.4	--	--	--	--	--	--	--	--	--	--	--	--
c23028.graph_c0	0	0	0	0	0	0	0	0	0	0	0	0	0	0	0	0	0	0	0	0	0	0	0	0	0	0	0	0	--	--	--	--	--	--	--	--	--	--	--	--
c8416.graph_c0	0	0	0	0	0	0	0	0	0.47	0.46	0	0.31	0	0.55	0.47	0.34	0	0.89	0	0.3	0	0	0.35	1.04	0	0.55	0	0.18	--	--	--	--	--	--	--	--	--	--	--	--
c49427.graph_c0	0	0	0	0	0	0	0	0	0	0	0	0	0	0	0	0	0	0	0	0	0	0	0	0	0	0	0	0	--	--	--	--	--	--	--	--	--	--	--	--
c35712.graph_c0	1.39	0	0	0.46	0	0	0	0	0	0	0	0	0	0	0	0	0	0	0	0	0	0	0	0	0	0	0	0	--	--	--	--	--	--	--	--	--	--	--	--
c20828.graph_c0	0	0	0	0	0	0	0	0	0	0	0	0	0	0	0	0	0	0	0	0	0	0	0	0	0	0	0	0	--	Molecular Function: translation initiation factor activity (GO:0003743);;	--	--	--	--	Eukaryotic translation initiation factor 5 OS=Vitis vinifera OX=29760 GN=EIF5_3 PE=3 SV=1	--	hypothetical protein F2P56_031124, partial [Juglans regia]	molecular function: binding (GO:0005488);; biological process: metabolic process (GO:0008152);; biological process: cellular process (GO:0009987)	--	LOC109021983
c62235.graph_c0	0	0	0	0	0	0	0.18	0.06	0	0.17	0	0.06	0.18	0	0	0.06	0	8.32	0	2.77	0	0.17	0.12	0.2	2.26	1.53	0.58	1.46	--	--	--	--	Lytic transglycolase	EG45-like domain containing protein OS=Citrus jambhiri OX=64884 GN=CjBAp12 PE=1 SV=1	Expansin-like EG45 domain-containing protein OS=Camellia sinensis var. sinensis OX=542762 GN=TEA_026233 PE=4 SV=1	Function unknown	EG45-like domain containing protein [Camellia sinensis]	--	--	LOC114303743
c885.graph_c0	0	0	0	0	0	0	0	0	0	0	0	0	0	0	0	0	0	0	0	0	0	0	0	0	0	0	0	0	--	--	--	--	--	--	--	--	--	--	--	--
c8741.graph_c0	0	0	0	0	0	0	0	0	0.21	0	0.37	0.19	0.12	0.23	0	0.12	0	0.84	0.41	0.42	0	0	0.08	0.25	0	0.25	0	0.08	--	--	--	Intracellular trafficking, secretion, and vesicular transport	Translocon-associated protein beta (TRAPB)	--	--	Intracellular trafficking, secretion, and vesicular transport	--	--	--	--
c27869.graph_c0	0	0	0	0	0	0	0	0	0	0	0	0	0	0	0	0	0	0	0	0	0	0	0	0	0	0	0	0	--	--	--	--	--	--	--	--	--	--	--	--
c77451.graph_c0	13.54	11.83	13.52	12.96	9.7	12.59	13.35	11.88	13.43	12.45	14.25	13.38	15.82	14.46	16.86	15.71	11.67	10.65	17.31	13.21	13.87	16.7	15.79	16.81	15.26	12.09	11.81	13.05	Inorganic ion transport and metabolism	Molecular Function: cation transmembrane transporter activity (GO:0008324);; Cellular Component: integral component of membrane (GO:0016021);;	K14689|2.3e-162|sind:105156075|K14689 solute carrier family 30 (zinc transporter), member 2 | (RefSeq) metal tolerance protein 1	Inorganic ion transport and metabolism	Cation efflux family	Metal tolerance protein 1 OS=Arabidopsis thaliana OX=3702 GN=MTP1 PE=1 SV=2	Solute carrier family 30 (Zinc transporter), member 2 OS=Salvia splendens OX=180675 GN=SLC30A2 PE=4 SV=1	Inorganic ion transport and metabolism	solute carrier family 30 (zinc transporter), member 2 [Salvia splendens]	molecular function: transporter activity (GO:0005215);; biological process: localization (GO:0051179);; cellular component: membrane (GO:0016020);; cellular component: membrane part (GO:0044425)	--	--
c30910.graph_c0	0	0	0	0	0	0	0	0	0	0	0	0	0	0	0	0	0.19	0.43	0	0.21	0	0	0	0	0.46	0	0	0.15	--	--	--	--	--	--	--	--	--	--	--	--
c76270.graph_c0	1.36	2.12	1.96	1.81	2.22	2.42	2.12	2.25	0.96	0.71	2.11	1.26	2.26	1.3	1.17	1.58	1.4	1.23	2.1	1.58	1.03	1.34	1.36	1.71	1.27	1.1	1.91	1.43	Lipid transport and metabolism	Molecular Function: methyl indole-3-acetate esterase activity (GO:0080030);;	K17872|6.6e-13|bdi:100823745|K17872 demethylphylloquinone reductase [EC:1.6.5.12] | (RefSeq) alternative NAD(P)H-ubiquinone oxidoreductase C1, chloroplastic/mitochondrial isoform X1	Defense mechanisms	alpha/beta hydrolase fold	Probable carboxylesterase 11 OS=Arabidopsis thaliana OX=3702 GN=CXE11 PE=2 SV=1	Arylacetamide deacetylase OS=Handroanthus impetiginosus OX=429701 GN=CDL12_18318 PE=4 SV=1	Defense mechanisms	Arylacetamide deacetylase [Handroanthus impetiginosus]	molecular function: catalytic activity (GO:0003824)	Ubiquinone and other terpenoid-quinone biosynthesis (ko00130)	--
c75911.graph_c0	6.92	7.91	10.57	8.47	5.72	7.76	7.99	7.16	7.38	6.31	6.78	6.82	8.07	12.87	8.32	9.75	9.3	12.04	11.62	10.99	12.65	13.49	12.39	11.02	12.13	12.61	14.56	13.1	--	Cellular Component: integral component of membrane (GO:0016021);;	--	--	Protein of unknown function (DUF677);; Protein BYPASS1-related	UPF0496 protein At5g66675 OS=Arabidopsis thaliana OX=3702 GN=At5g66675 PE=2 SV=1	Uncharacterized protein OS=Salvia splendens OX=180675 GN=Saspl_049399 PE=3 SV=1	Function unknown	hypothetical protein Saspl_049399 [Salvia splendens]	cellular component: membrane (GO:0016020);; cellular component: membrane part (GO:0044425)	--	--
c58164.graph_c0	0	0.52	0	0.17	0.51	0	1.04	0.52	0.48	0	0	0.16	0	0.5	0.48	0.33	0	0	0	0	0	1	0.33	0	1	0	0.51	0.5	--	--	--	--	--	--	--	--	--	--	--	--
c46494.graph_c0	0	0	0	0	0	0	0	0	0	0	0	0	0	0	0	0	0.72	0	0	0.24	0	0	0	0	0	0	0	0	--	--	--	--	--	--	--	--	--	--	--	--
c103175.graph_c0	0	0	0	0	0	0	0	0	0	0	0	0	0	0	0	0	0	0	0	0	0	0	0	0	0	0	0.92	0.31	--	--	--	--	--	--	--	--	--	--	--	--
c44357.graph_c0	0	0	0	0	0	0	0	0	0	0.46	0	0.15	0.49	0	0	0.16	0	0	0	0	0	1.47	1.18	2.08	0	0	0	0	--	Molecular Function: molecular_function (GO:0003674);; Molecular Function: catalytic activity (GO:0003824);; Molecular Function: thioredoxin-disulfide reductase activity (GO:0004791);; Cellular Component: cellular_component (GO:0005575);; Cellular Component: intracellular (GO:0005622);; Cellular Component: obsolete cell (GO:0005623);; Cellular Component: cytoplasm (GO:0005737);; Biological Process…	--	--	--	--	Thioredoxin domain-containing protein OS=Salvia splendens OX=180675 GN=Saspl_018237 PE=4 SV=1	Posttranslational modification, protein turnover, chaperones	hypothetical protein Saspl_018237 [Salvia splendens]	molecular function: catalytic activity (GO:0003824);; molecular function: antioxidant activity (GO:0016209);; biological process: metabolic process (GO:0008152);; biological process: cellular process (GO:0009987);; biological process: single-organism process (GO:0044699);; biological process: response to stimulus (GO:0050896);; biological process: detoxification (GO:0098754);; cellular component:…	--	--
c41898.graph_c0	0	0	0.76	0.25	0	0	0	0	0.34	0	0	0.11	0	0	0	0	0	0	0.62	0.21	0	0	0.51	1.53	0.36	0	0	0.12	--	--	--	--	--	--	--	--	--	--	--	--
c26015.graph_c0	1.08	1.01	3.06	1.72	2.46	0.65	2.01	1.71	1.83	2.25	4.03	2.7	0	1.07	1.83	0.97	2.21	0.87	2.48	1.85	3.58	0.96	1.51	0	3.36	0	2.47	1.94	--	--	--	--	--	--	--	--	--	--	--	--
c81152.graph_c1	13.56	18.78	13.08	15.14	13.01	10.66	25	16.22	16	7.86	14.47	12.78	11.91	12.2	17.34	13.82	16.27	17.98	23.06	19.1	14.33	21.95	18.63	19.6	14.68	21.96	14.98	17.21	--	--	--	--	--	--	--	--	--	--	--	--
c82961.graph_c0	28.07	23.13	38.88	30.03	35.21	25.31	30.25	30.26	33.36	31.93	39.54	34.94	39.15	32.28	42.97	38.13	36.96	28.31	39.86	35.04	41.76	45.26	40.35	34.03	37.6	45.65	49.03	44.09	--	Molecular Function: RNA binding (GO:0003723);; Cellular Component: nucleolus (GO:0005730);;	K11129|1.5e-10|vvi:100266210|K11129 H/ACA ribonucleoprotein complex subunit 2 | (RefSeq) H/ACA ribonucleoprotein complex subunit 2-like protein	RNA processing and modification	--	H/ACA ribonucleoprotein complex subunit 2-like protein OS=Arabidopsis thaliana OX=3702 GN=At5g08180 PE=1 SV=1	Ribonucloprotein OS=Vitis vinifera OX=29760 GN=VvCHDp000397_1 PE=3 SV=1	RNA processing and modification	H/ACA ribonucleoprotein complex subunit 2-like protein [Vitis vinifera]	molecular function: binding (GO:0005488);; cellular component: cell (GO:0005623);; cellular component: membrane-enclosed lumen (GO:0031974);; cellular component: organelle (GO:0043226);; cellular component: organelle part (GO:0044422);; cellular component: cell part (GO:0044464)	Ribosome biogenesis in eukaryotes (ko03008)	--
c67715.graph_c0	0.14	0.19	0.06	0.13	0.32	0.32	0.78	0.47	0.23	0.12	0.46	0.27	0.25	0.49	0.06	0.27	0.21	0.16	0.06	0.14	0.26	0.18	0.19	0.13	0.17	0.41	0.25	0.28	--	--	--	--	--	--	--	--	--	--	--	--
c82041.graph_c0	19.77	18.89	17.98	18.88	16.96	18.55	18.93	18.15	17.72	15.98	20.9	18.2	19.84	32.44	18.62	23.63	18.3	19.69	21.12	19.7	20.42	25.43	22.24	20.88	22.2	17.97	20.91	20.36	--	Cellular Component: integral component of membrane (GO:0016021);;	--	--	Sulfite exporter TauE/SafE	Sulfite exporter TauE/SafE family protein 3 OS=Arabidopsis thaliana OX=3702 GN=At2g25737 PE=2 SV=1	Uncharacterized protein OS=Salvia splendens OX=180675 GN=Saspl_017843 PE=4 SV=1	Function unknown	hypothetical protein Saspl_017843 [Salvia splendens]	cellular component: membrane (GO:0016020);; cellular component: membrane part (GO:0044425)	--	--
c71851.graph_c0	0.75	0.79	1.32	0.95	1.06	1.14	1.41	1.2	0.85	1.34	1.25	1.15	1.05	0.29	1.4	0.91	0.32	0.79	0.61	0.57	0.51	0.76	0.6	0.53	0.56	0.72	1.1	0.79	--	--	--	--	--	--	--	--	--	--	--	--
c69938.graph_c1	20.75	20.43	17.34	19.51	17.29	12.24	14.57	14.7	20.25	17.58	23.96	20.6	19.8	18.21	21.8	19.94	18.17	16.92	22.21	19.1	21.8	20.48	20.55	19.36	20.23	17.48	17.13	18.28	--	Cellular Component: mitochondrion (GO:0005739);; Cellular Component: integral component of membrane (GO:0016021);;	K03879|3.0e-12|bvg:809516|K03879 NADH-ubiquinone oxidoreductase chain 2 [EC:7.1.1.2] | (RefSeq) orf300, BevupMp030; orf300	Chromatin structure and dynamics	--	NADH-ubiquinone oxidoreductase chain 2 OS=Beta vulgaris OX=161934 GN=ND2 PE=3 SV=2	Uncharacterized protein orf300 OS=Beta vulgaris subsp. maritima OX=350892 GN=orf300 PE=4 SV=1	Chromatin structure and dynamics	orf300 gene product [Beta vulgaris subsp. vulgaris]	cellular component: cell (GO:0005623);; cellular component: organelle (GO:0043226);; cellular component: cell part (GO:0044464);; cellular component: membrane (GO:0016020);; cellular component: membrane part (GO:0044425)	Oxidative phosphorylation (ko00190)	orf300
c99927.graph_c0	0	0	0	0	0.49	0	0	0.16	0	0	0.5	0.17	0	0	0	0	0	0	0	0	0	1.44	0.48	0	0	0	0	0	--	Molecular Function: nucleic acid binding (GO:0003676);; Biological Process: DNA integration (GO:0015074);;	K12349|1.5e-21|ccaj:109806181|K12349 neutral ceramidase [EC:3.5.1.23] | (RefSeq) neutral ceramidase-like	General function prediction only	--	--	Putative retrotransposon protein OS=Phyllostachys edulis OX=38705 PE=4 SV=1	Amino acid transport and metabolism	putative retrotransposon protein [Phyllostachys edulis]	molecular function: binding (GO:0005488);; biological process: metabolic process (GO:0008152);; biological process: cellular process (GO:0009987)	Sphingolipid metabolism (ko00600)	--
c77015.graph_c0	100.31	92.04	86.38	92.91	104.92	130.4	77.67	104.33	85.7	111.61	76.2	91.17	77.38	63.85	79.07	73.43	123.34	101.75	98.73	107.94	83.52	67.81	75.96	76.55	87.07	67.11	83.72	79.3	Posttranslational modification, protein turnover, chaperones	Molecular Function: peptidyl-prolyl cis-trans isomerase activity (GO:0003755);;	K01802|3.8e-86|sind:105158783|K01802 peptidylprolyl isomerase [EC:5.2.1.8] | (RefSeq) peptidyl-prolyl cis-trans isomerase FKBP16-3, chloroplastic	Posttranslational modification, protein turnover, chaperones	FKBP-type peptidyl-prolyl cis-trans isomerase	Peptidyl-prolyl cis-trans isomerase FKBP16-3, chloroplastic OS=Arabidopsis thaliana OX=3702 GN=FKBP16-3 PE=1 SV=2	Peptidylprolyl isomerase OS=Salvia splendens OX=180675 GN=Saspl_002655 PE=4 SV=1	Posttranslational modification, protein turnover, chaperones	hypothetical protein Saspl_002655 [Salvia splendens]	molecular function: catalytic activity (GO:0003824);; biological process: metabolic process (GO:0008152);; biological process: cellular process (GO:0009987)	--	--
c64007.graph_c0	0	0	0	0	0	0	0.7	0.23	0.21	2.11	0	0.77	0	0	0	0	0	0	0	0	0.8	0	0.53	0.79	0	0	0	0	--	--	--	--	--	--	--	--	--	--	--	--
c100051.graph_c0	0	0	0	0	0	0	1.52	0.51	0	0	0	0	0	0	0	0	0	0	0	0	0	0	0	0	0	0	0	0	--	--	--	--	--	--	--	--	--	--	--	--
c53800.graph_c0	0	0	0	0	0	0.48	0	0.16	0	0	0	0	0	0	0	0	0.58	0	0.65	0.41	0.8	1.12	0.64	0	0	0	0	0	--	--	--	--	--	--	--	--	--	--	--	--
c41944.graph_c1	0	0	0	0	0	0	0	0	0	0	0	0	0	0	0	0	0	0	0	0	0	0	0	0	0	0	1.77	0.59	--	Biological Process: defense response (GO:0006952);;	--	--	--	--	--	--	--	biological process: response to stimulus (GO:0050896)	--	--
c81765.graph_c0	8.37	7.88	11.17	9.14	8.93	10.18	9.35	9.49	9.04	7.19	7	7.74	9.58	9.52	8.73	9.28	10.56	9.72	7.86	9.38	8.28	12	10.04	9.83	10.95	11.04	12.57	11.52	--	Cellular Component: nucleus (GO:0005634);; Biological Process: transcription, DNA-templated (GO:0006351);;	K14721|3.2e-170|sind:105177973|K14721 DNA-directed RNA polymerase III subunit RPC5 | (RefSeq) DNA-directed RNA polymerase III subunit RPC5	Transcription	Sin-like protein conserved region	--	Uncharacterized protein OS=Salvia splendens OX=180675 GN=Saspl_039973 PE=4 SV=1	Transcription	hypothetical protein Saspl_039973 [Salvia splendens]	cellular component: cell (GO:0005623);; cellular component: organelle (GO:0043226);; cellular component: cell part (GO:0044464);; biological process: metabolic process (GO:0008152);; biological process: cellular process (GO:0009987)	RNA polymerase (ko03020)	--
c41092.graph_c0	0	0	0	0	0	0	0	0	0	0	0	0	0	0	0	0	0	0	0	0	0	0	0	0	0	0	0	0	--	--	--	--	--	--	--	--	--	--	--	--
c110558.graph_c0	0	0	0	0	0	0	0	0	0	0	0	0	0	0	0	0	0	0	0	0	0	0	0	0	0	0	0	0	Energy production and conversion	Molecular Function: acetyl-CoA hydrolase activity (GO:0003986);; Biological Process: acetate metabolic process (GO:0006083);; Molecular Function: acetate CoA-transferase activity (GO:0008775);; Biological Process: propionate metabolic process, methylcitrate cycle (GO:0019679);;	--	Energy production and conversion	--	--	Acetyl-CoA deacylase OS=Nannochloropsis gaditana OX=72520 GN=Naga_100134g17 PE=3 SV=1	--	uncharacterized protein LOC115741747 [Rhodamnia argentea]	molecular function: catalytic activity (GO:0003824);; biological process: metabolic process (GO:0008152);; biological process: cellular process (GO:0009987);; biological process: single-organism process (GO:0044699)	--	LOC115741747
c115524.graph_c0	0	0	0	0	0	0	0	0	0	0	0	0	0	0	0	0	0	0	0	0	0	0	0	0	0	0	0	0	--	--	--	--	--	--	--	--	--	--	--	--
c61479.graph_c0	0	0	0	0	0.24	3.34	0	1.19	0	0.22	0	0.07	0	0.17	0.23	0.13	0.81	0.15	0.21	0.39	1.32	0	0.44	0	0.7	0	0	0.23	--	--	--	--	--	--	--	--	--	--	--	--
c38800.graph_c0	0	0	0	0	0	0	0	0	0	0	0	0	0	0	0	0	0	0	1.25	0.42	0	0	0	0	0	0	0	0	--	--	--	--	--	--	--	--	--	--	--	--
c84502.graph_c0	23.91	17.9	46.7	29.5	23.59	19.79	11.81	18.4	29.31	19.8	13.53	20.88	15.12	9.43	18.36	14.3	29.5	20.41	61.42	37.11	36.84	28.75	30.16	24.9	23.98	17.93	15.6	19.17	--	Molecular Function: copper ion binding (GO:0005507);; Molecular Function: oxidoreductase activity (GO:0016491);;	K19791|1.4e-275|sind:105167465|K19791 iron transport multicopper oxidase | (RefSeq) L-ascorbate oxidase homolog	Secondary metabolites biosynthesis, transport and catabolism	Multicopper oxidase;; Multicopper oxidase;; Multicopper oxidase	L-ascorbate oxidase homolog OS=Brassica napus OX=3708 GN=Bp10 PE=2 SV=1	Uncharacterized protein OS=Salvia splendens OX=180675 GN=Saspl_007884 PE=3 SV=1	Secondary metabolites biosynthesis, transport and catabolism	hypothetical protein Saspl_007884 [Salvia splendens]	molecular function: binding (GO:0005488);; molecular function: catalytic activity (GO:0003824);; biological process: metabolic process (GO:0008152);; biological process: single-organism process (GO:0044699)	--	--
c55933.graph_c0	0.17	0	0.64	0.27	0.15	0.17	0.31	0.21	0.14	0	0	0.05	0.15	0	0	0.05	0	0	0.27	0.09	0.16	0.15	0.16	0.16	0.15	0.16	0.46	0.26	--	Molecular Function: protein kinase activity (GO:0004672);; Molecular Function: ATP binding (GO:0005524);; Cellular Component: integral component of membrane (GO:0016021);; Molecular Function: carbohydrate binding (GO:0030246);;	--	Signal transduction mechanisms	Legume lectin domain	L-type lectin-domain containing receptor kinase S.6 OS=Arabidopsis thaliana OX=3702 GN=LECRKS6 PE=2 SV=1	Protein kinase domain-containing protein OS=Salvia splendens OX=180675 GN=Saspl_025036 PE=3 SV=1	Signal transduction mechanisms	hypothetical protein Saspl_025036 [Salvia splendens]	molecular function: catalytic activity (GO:0003824);; biological process: metabolic process (GO:0008152);; biological process: cellular process (GO:0009987);; molecular function: binding (GO:0005488);; cellular component: membrane (GO:0016020);; cellular component: membrane part (GO:0044425)	--	--
c28807.graph_c0	0	0	0	0	0	0	0	0	0.37	0.38	0.21	0.32	0.2	0.21	0	0.14	0	0	0.7	0.23	0	0	0.21	0.64	0	0.43	0	0.14	--	--	--	--	--	--	--	--	--	--	--	--
c64131.graph_c0	0	0	0	0	0	0	0	0	0	0	0	0	0	0	0	0	0	0	0	0	0	0	0	0	0	0	0	0	--	--	--	--	--	--	--	--	--	--	--	--
c39254.graph_c0	0	0	0	0	0	0	0	0	0.27	0	0	0.09	0.15	0	0	0.05	0	0.93	0	0.31	0	0	0.21	0.62	0	0	0	0	--	Biological Process: mitotic sister chromatid segregation (GO:0000070);; Biological Process: cell cycle checkpoint (GO:0000075);; Cellular Component: ubiquitin ligase complex (GO:0000151);; Biological Process: mitotic cell cycle (GO:0000278);; Biological Process: nuclear division (GO:0000280);; Cellular Component: chromosome, centromeric region (GO:0000775);; Cellular Component: kinetochore (GO:00…	K02180|2.8e-38|pxb:103928092|K02180 cell cycle arrest protein BUB3 | (RefSeq) mitotic checkpoint protein BUB3.2-like	Cell cycle control, cell division, chromosome partitioning	WD domain, G-beta repeat	Mitotic checkpoint protein BUB3.1 OS=Arabidopsis thaliana OX=3702 GN=BUB3.1 PE=1 SV=1	WD_REPEATS_REGION domain-containing protein OS=Picea sitchensis OX=3332 PE=2 SV=1	Cell cycle control, cell division, chromosome partitioning	mitotic checkpoint protein BUB3-like [Rhodamnia argentea]	biological process: cellular process (GO:0009987);; biological process: single-organism process (GO:0044699);; biological process: cellular component organization or biogenesis (GO:0071840);; biological process: biological regulation (GO:0065007);; cellular component: cell (GO:0005623);; cellular component: macromolecular complex (GO:0032991);; cellular component: cell part (GO:0044464);; cellula…	--	--
c88817.graph_c0	0	0	0	0	0.58	0	0	0.19	0	0	0	0	0	0	0	0	0.43	0	0	0.14	0	0	0	0	0.57	0	0	0.19	--	--	--	--	--	--	--	--	--	--	--	--
c69950.graph_c5	1.49	1.2	3.64	2.11	3.46	1.01	3.87	2.78	3.11	2.08	3.22	2.8	4.34	3.45	4.5	4.1	3.96	4.15	3.54	3.88	3.16	3.83	3.93	4.81	2.13	3.1	1.05	2.09	--	--	--	--	--	--	--	--	--	--	--	--
c67386.graph_c0	1.26	0.82	0.68	0.92	1.02	0.68	0.16	0.62	0.28	0.64	0.97	0.63	0.87	2.08	0.73	1.23	2.81	0.93	3.84	2.53	2.64	4.99	3.19	1.94	1.58	1.87	1.23	1.56	Energy production and conversion	Molecular Function: oxidoreductase activity (GO:0016491);; Molecular Function: FAD binding (GO:0071949);;	K22395|2.0e-44|nau:109214673|K22395 cinnamyl-alcohol dehydrogenase [EC:1.1.1.195] | (RefSeq) berberine bridge enzyme-like 28	--	FAD binding domain	Berberine bridge enzyme-like 18 OS=Arabidopsis thaliana OX=3702 GN=At4g20820 PE=3 SV=1	FAD-binding PCMH-type domain-containing protein OS=Salvia splendens OX=180675 GN=Saspl_008555 PE=3 SV=1	Energy production and conversion	hypothetical protein Saspl_008555 [Salvia splendens]	molecular function: catalytic activity (GO:0003824);; biological process: metabolic process (GO:0008152);; biological process: single-organism process (GO:0044699);; molecular function: binding (GO:0005488)	Phenylpropanoid biosynthesis (ko00940)	--
c41287.graph_c1	0.09	0.16	0.25	0.17	0	0.08	0	0.03	0.14	0.15	0	0.1	0	0.08	0	0.03	0.13	0	0.07	0.07	0.08	0.23	0.25	0.43	0	0	0.24	0.08	--	--	--	--	--	--	--	--	--	--	--	--
c55050.graph_c0	0	0	0	0	0	0	0	0	0	0	0	0	0	0	0	0	0	0	0	0	0	0	0	0	0	0	0	0	--	--	--	--	--	--	Uncharacterized protein OS=Salvia splendens OX=180675 GN=Saspl_051157 PE=4 SV=1	Function unknown	uncharacterized protein At4g00950 [Sesamum indicum]	--	--	LOC105166751
c21478.graph_c0	0	0	0	0	0	0	0	0	0	0	0	0	0	0	0	0	0	0	0	0	0	0	0	0	0	0	0	0	--	Molecular Function: DNA binding (GO:0003677);; Molecular Function: helicase activity (GO:0004386);; Molecular Function: ATP binding (GO:0005524);; Cellular Component: nucleus (GO:0005634);;	K11643|3.7e-18|smo:SELMODRAFT_177985|K11643 chromodomain-helicase-DNA-binding protein 4 [EC:3.6.4.12] | (RefSeq) hypothetical protein	General function prediction only	Helicase conserved C-terminal domain	CHD3-type chromatin-remodeling factor PICKLE OS=Arabidopsis thaliana OX=3702 GN=PKL PE=1 SV=1	Chromodomain-helicase-DNA-binding protein, putative OS=Hondaea fermentalgiana OX=2315210 GN=FCC1311_089432 PE=4 SV=1	--	LOW QUALITY PROTEIN: chromodomain-helicase-DNA-binding protein Mi-2 homolog [Rhodamnia argentea]	molecular function: binding (GO:0005488);; molecular function: catalytic activity (GO:0003824);; cellular component: cell (GO:0005623);; cellular component: organelle (GO:0043226);; cellular component: cell part (GO:0044464)	--	--
c33.graph_c1	0	0	0	0	0.22	0.75	0.22	0.4	0	0.2	0	0.07	0	0	0	0	0	0	0	0	0	0.42	0.14	0	0.42	0	0	0.14	--	--	--	--	--	--	--	--	--	--	--	--
c87503.graph_c0	0	0	0	0	0	0	0	0	0	0	1.89	0.63	0	0	1.74	0.58	0	0	1.55	0.52	0	1.87	0.95	0.97	1.87	0	0	0.62	--	--	--	--	--	--	--	--	--	--	--	--
c73658.graph_c0	21.67	21.61	21.93	21.74	21.86	25.53	20.97	22.79	25.98	22.75	16.75	21.83	23.08	25.85	23.69	24.21	17.95	18.99	27.02	21.32	23.65	24.28	23.21	21.69	20.69	21.39	23.85	21.98	--	Biological Process: response to acid chemical (GO:0001101);; Molecular Function: protein binding (GO:0005515);; Cellular Component: cellular_component (GO:0005575);; Cellular Component: intracellular (GO:0005622);; Cellular Component: obsolete cell (GO:0005623);; Cellular Component: nucleus (GO:0005634);; Biological Process: response to stress (GO:0006950);; Biological Process: response to osmoti…	K10523|1.1e-162|sind:105165278|K10523 speckle-type POZ protein | (RefSeq) BTB/POZ and MATH domain-containing protein 2	--	BTB/POZ domain	BTB/POZ and MATH domain-containing protein 2 OS=Arabidopsis thaliana OX=3702 GN=BPM2 PE=1 SV=1	Speckle-type POZ protein SPOP OS=Handroanthus impetiginosus OX=429701 GN=CDL12_29251 PE=4 SV=1	Cell cycle control, cell division, chromosome partitioning	BTB/POZ and MATH domain-containing protein 2 [Sesamum indicum]	biological process: response to stimulus (GO:0050896);; molecular function: binding (GO:0005488);; cellular component: cell (GO:0005623);; cellular component: cell part (GO:0044464);; cellular component: organelle (GO:0043226);; biological process: cellular process (GO:0009987)	--	LOC105165278
c67640.graph_c0	4.68	5.07	4.61	4.79	4.22	3.98	5.1	4.43	5.3	5.58	3.75	4.88	4.91	5.01	5.41	5.11	4.96	3.34	5.53	4.61	5.38	4.97	4.57	3.37	5.27	4.6	6.44	5.44	--	--	--	--	--	--	--	--	--	--	--	--
c90523.graph_c0	0	0	0	0	0	0	1.43	0.48	0.43	0	0	0.14	0	0	0	0	0.7	0	0	0.23	0	0	0	0	0	0.51	0	0.17	--	--	--	--	--	--	--	--	--	--	--	--
c16290.graph_c0	0	0	0	0	0	0	0	0	0	0	0	0	0	0	0	0	0	2.38	0	0.79	0	0	0	0	0	0	0	0	--	--	--	--	--	--	--	--	--	--	--	--
c105555.graph_c0	0	0	0	0	0	0	0	0	0	0	1.62	0.54	0	0	0	0	0	0	0	0	0	0	0	0	0	0	0	0	--	Molecular Function: hydrolase activity (GO:0016787);;	K11406|7.8e-23|vra:106769428|K11406 histone deacetylase 4/5 [EC:3.5.1.98] | (RefSeq) histone deacetylase 5	Chromatin structure and dynamics	Histone deacetylase domain	Histone deacetylase 18 OS=Arabidopsis thaliana OX=3702 GN=HDA18 PE=2 SV=1	Histone deacetylase OS=Brassica oleracea var. oleracea OX=109376 PE=4 SV=1	Chromatin structure and dynamics	histone deacetylase 6-like [Rhodamnia argentea]	molecular function: catalytic activity (GO:0003824)	--	LOC115744244
c14080.graph_c0	0	0	0	0	0	0	0	0	0	0	0	0	0	0	0	0	0	0	0	0	0	0	0	0	0	0	0	0	General function prediction only	Molecular Function: molecular_function (GO:0003674);; Molecular Function: catalytic activity (GO:0003824);; Biological Process: cellular aldehyde metabolic process (GO:0006081);; Biological Process: organic acid metabolic process (GO:0006082);; Biological Process: lactate metabolic process (GO:0006089);; Biological Process: biological_process (GO:0008150);; Biological Process: metabolic process (…	K18881|1.9e-30|sind:105175971|K18881 D-lactate dehydratase [EC:4.2.1.130] | (RefSeq) protein DJ-1 homolog D	--	DJ-1/PfpI family	Protein DJ-1 homolog D OS=Arabidopsis thaliana OX=3702 GN=DJ1D PE=1 SV=1	D-lactate dehydratase OS=Salvia splendens OX=180675 GN=DJ1D PE=3 SV=1	Defense mechanisms	D-lactate dehydratase [Salvia splendens]	molecular function: catalytic activity (GO:0003824);; biological process: metabolic process (GO:0008152);; biological process: cellular process (GO:0009987);; biological process: single-organism process (GO:0044699)	Pyruvate metabolism (ko00620)	--
c46603.graph_c0	1.4	0.52	0	0.64	0	0	0	0	0	0	1.6	0.53	0.25	0.26	0	0.17	0.6	0	0	0.2	0.27	0	0.09	0	0.25	0.51	1.56	0.77	--	--	--	--	--	--	--	--	--	--	--	--
c105387.graph_c0	0	0.3	0.3	0.2	0	0	0	0	0.27	0	0	0.09	0	0.3	0	0.1	0	0	0	0	0	0	0	0	0	0	0	0	--	--	--	--	--	--	--	--	--	--	--	--
c38802.graph_c1	0.12	0.11	0	0.08	0.11	0.24	0	0.12	0.1	0	0.12	0.07	0.56	0	0	0.19	0	0	0.29	0.1	0	0.22	0.07	0	0.32	0	0.45	0.26	--	Molecular Function: nucleic acid binding (GO:0003676);; Biological Process: DNA integration (GO:0015074);;	K11593|1.4e-10|dct:110097550|K11593 eukaryotic translation initiation factor 2C | (RefSeq) protein argonaute 1A-like	General function prediction only	--	Retrovirus-related Pol polyprotein from transposon RE2 OS=Arabidopsis thaliana OX=3702 GN=RE2 PE=4 SV=1	Integrase catalytic domain-containing protein OS=Trifolium subterraneum OX=3900 GN=TSUD_336290 PE=4 SV=1	Transcription	hypothetical protein TSUD_336290 [Trifolium subterraneum]	molecular function: binding (GO:0005488);; biological process: metabolic process (GO:0008152);; biological process: cellular process (GO:0009987)	--	--
c78641.graph_c1	1.87	2.83	3.48	2.73	2.98	3.39	1.42	2.6	2.11	3.04	1.27	2.14	1.79	1.34	1.82	1.65	2.61	1.64	4.96	3.07	3.07	2.32	3.05	3.76	2.99	3.24	2.24	2.82	Cell wall/membrane/envelope biogenesis	Cellular Component: Golgi membrane (GO:0000139);; Biological Process: pectin biosynthetic process (GO:0045489);; Molecular Function: polygalacturonate 4-alpha-galacturonosyltransferase activity (GO:0047262);; Biological Process: cell wall organization (GO:0071555);;	K20867|2.8e-209|sind:105176843|K20867 galacturonosyltransferase 12/13/14/15 [EC:2.4.1.-] | (RefSeq) probable galacturonosyltransferase 15 isoform X1	--	Glycosyl transferase family 8;; Glucosyltransferase 24	Probable galacturonosyltransferase 15 OS=Arabidopsis thaliana OX=3702 GN=GAUT15 PE=2 SV=1	Hexosyltransferase OS=Salvia splendens OX=180675 GN=GAUT PE=3 SV=1	Carbohydrate transport and metabolism	probable galacturonosyltransferase 15 isoform X1 [Sesamum indicum]	cellular component: cell (GO:0005623);; cellular component: membrane (GO:0016020);; cellular component: organelle (GO:0043226);; cellular component: organelle part (GO:0044422);; cellular component: cell part (GO:0044464);; biological process: metabolic process (GO:0008152);; biological process: single-organism process (GO:0044699);; molecular function: catalytic activity (GO:0003824);; biologica…	--	LOC105176843
c84108.graph_c0	2.34	3.16	6.32	3.94	5.76	0.96	1.43	2.72	4.25	1.94	1.06	2.42	2.51	2.12	2.38	2.34	2.41	1.94	8.27	4.21	6.26	5.78	5.86	5.54	4.24	1.84	2.69	2.92	Translation, ribosomal structure and biogenesis	Molecular Function: asparagine-tRNA ligase activity (GO:0004816);; Molecular Function: ATP binding (GO:0005524);; Biological Process: asparaginyl-tRNA aminoacylation (GO:0006421);;	K01893|3.0e-231|sind:105170103|K01893 asparaginyl-tRNA synthetase [EC:6.1.1.22] | (RefSeq) asparagine--tRNA ligase, cytoplasmic 2 isoform X2	Translation, ribosomal structure and biogenesis	tRNA synthetases class II (D, K and N)	Asparagine--tRNA ligase, cytoplasmic 2 OS=Arabidopsis thaliana OX=3702 GN=SYNC2 PE=1 SV=2	Asparagine--tRNA ligase OS=Salvia splendens OX=180675 GN=NARS PE=3 SV=1	Translation, ribosomal structure and biogenesis	asparagine--tRNA ligase, cytoplasmic 2 isoform X2 [Sesamum indicum]	molecular function: catalytic activity (GO:0003824);; molecular function: binding (GO:0005488);; biological process: metabolic process (GO:0008152);; biological process: cellular process (GO:0009987);; biological process: single-organism process (GO:0044699)	Aminoacyl-tRNA biosynthesis (ko00970)	LOC105170103
c75289.graph_c0	13.61	10.74	13.57	12.64	11.54	10.67	11	11.07	10.91	11.46	8.11	10.16	7.57	7.99	9.97	8.51	23.43	11.73	17.64	17.6	13.09	9.55	10.91	10.1	10.94	12.53	10.88	11.45	Nucleotide transport and metabolism	Molecular Function: uracil phosphoribosyltransferase activity (GO:0004845);; Biological Process: uracil salvage (GO:0006223);; Biological Process: nucleoside metabolic process (GO:0009116);;	K00761|2.7e-128|sind:105174490|K00761 uracil phosphoribosyltransferase [EC:2.4.2.9] | (RefSeq) uracil phosphoribosyltransferase isoform X2	--	Uracil phosphoribosyltransferase;; Phosphoribosyl transferase domain	Uracil phosphoribosyltransferase OS=Nicotiana tabacum OX=4097 GN=UPP PE=2 SV=1	UMP pyrophosphorylase OS=Handroanthus impetiginosus OX=429701 GN=CDL12_14399 PE=3 SV=1	--	Uracil phosphoribosyltransferase [Handroanthus impetiginosus]	molecular function: catalytic activity (GO:0003824);; biological process: metabolic process (GO:0008152);; biological process: cellular process (GO:0009987);; biological process: single-organism process (GO:0044699)	Pyrimidine metabolism (ko00240)	--
c59508.graph_c0	0	0	0	0	0	0	0	0	0	0	0	0	0	0	0	0	0	0	0	0	0	0	0	0	0	1.57	5.33	2.3	Translation, ribosomal structure and biogenesis	Molecular Function: molecular_function (GO:0003674);; Molecular Function: structural constituent of ribosome (GO:0003735);; Molecular Function: structural molecule activity (GO:0005198);; Cellular Component: cellular_component (GO:0005575);; Cellular Component: intracellular (GO:0005622);; Cellular Component: obsolete cell (GO:0005623);; Cellular Component: nucleus (GO:0005634);; Cellular Compone…	K02912|1.1e-36|qsu:112007945|K02912 large subunit ribosomal protein L32e | (RefSeq) 60S ribosomal protein L32-like	Translation, ribosomal structure and biogenesis	Ribosomal protein L32	60S ribosomal protein L32-2 OS=Arabidopsis thaliana OX=3702 GN=RPL32B PE=2 SV=1	Uncharacterized protein OS=Lupinus albus OX=3870 GN=Lal_00015232 PE=3 SV=1	Translation, ribosomal structure and biogenesis	ribosomal protein L32e [Delphinella strobiligena]	molecular function: structural molecule activity (GO:0005198);; cellular component: cell (GO:0005623);; cellular component: cell part (GO:0044464);; cellular component: organelle (GO:0043226);; cellular component: membrane-enclosed lumen (GO:0031974);; cellular component: organelle part (GO:0044422);; cellular component: macromolecular complex (GO:0032991);; biological process: metabolic process …	Ribosome (ko03010)	--
c13978.graph_c0	0	0	0	0	0	0	0	0	0	0	0	0	0	0	0	0	0	0	0	0	0	0	0	0	0	0	0	0	--	--	--	--	--	--	--	--	--	--	--	--
c65062.graph_c0	14.34	11.2	10.98	12.17	13.6	7.76	11.44	10.93	11.08	11.25	21.68	14.67	12.7	13.22	15.52	13.81	14.09	16.36	14.67	15.04	12.73	18.2	18.67	25.07	17.95	18.21	16.31	17.49	--	--	--	--	--	--	--	--	--	--	--	--
c46112.graph_c1	0	0	0.38	0.13	0	0	0	0	0	0.67	0	0.22	0	0	0	0	0.56	0	0.31	0.29	0.76	0.35	0.5	0.38	0	1.18	0	0.39	--	Molecular Function: polygalacturonase activity (GO:0004650);; Cellular Component: extracellular region (GO:0005576);; Biological Process: carbohydrate metabolic process (GO:0005975);; Biological Process: cell wall organization (GO:0071555);;	K01184|4.2e-39|sind:105162093|K01184 polygalacturonase [EC:3.2.1.15] | (RefSeq) polygalacturonase QRT2-like isoform X1	--	Glycosyl hydrolases family 28	Polygalacturonase OS=Actinidia deliciosa OX=3627 PE=2 SV=1	Uncharacterized protein OS=Salvia splendens OX=180675 GN=Saspl_016466 PE=3 SV=1	Carbohydrate transport and metabolism	hypothetical protein Saspl_016466 [Salvia splendens]	molecular function: catalytic activity (GO:0003824);; cellular component: extracellular region (GO:0005576);; biological process: metabolic process (GO:0008152);; biological process: cellular process (GO:0009987);; biological process: cellular component organization or biogenesis (GO:0071840)	Pentose and glucuronate interconversions (ko00040)	--
c114996.graph_c0	0	0	0	0	0	0	0	0	0	0	0	0	0	0	0	0	0	0	0	0	0	0	0	0	0	0	0	0	Posttranslational modification, protein turnover, chaperones	Molecular Function: ATP binding (GO:0005524);; Biological Process: protein folding (GO:0006457);; Molecular Function: unfolded protein binding (GO:0051082);;	K09487|2.1e-33|nnu:104590041|K09487 heat shock protein 90kDa beta | (RefSeq) endoplasmin homolog	Posttranslational modification, protein turnover, chaperones	Hsp90 protein	Endoplasmin homolog OS=Catharanthus roseus OX=4058 GN=HSP90 PE=2 SV=1	endoplasmin homolog OS=Nelumbo nucifera OX=4432 GN=LOC104590041 PE=3 SV=1	Posttranslational modification, protein turnover, chaperones	PREDICTED: endoplasmin homolog [Nelumbo nucifera]	molecular function: binding (GO:0005488);; biological process: cellular process (GO:0009987)	Protein processing in endoplasmic reticulum (ko04141);; Plant-pathogen interaction (ko04626)	LOC104590041
c43421.graph_c0	0	0	0	0	0	0	0	0	0	0	0	0	0	0	0	0	0	0	0	0	0	0	0	0	0	0	0	0	--	Cellular Component: chromosome, telomeric region (GO:0000781);; Molecular Function: DNA binding (GO:0003677);; Molecular Function: telomerase RNA reverse transcriptase activity (GO:0003721);; Cellular Component: nucleus (GO:0005634);; Molecular Function: metal ion binding (GO:0046872);;	K11126|5.0e-19|sind:105169053|K11126 telomerase reverse transcriptase [EC:2.7.7.49] | (RefSeq) telomerase reverse transcriptase isoform X3	--	Telomerase ribonucleoprotein complex - RNA binding domain	--	Telomerase reverse transcriptase OS=Salvia splendens OX=180675 GN=Saspl_041826 PE=3 SV=1	--	hypothetical protein Saspl_041826 [Salvia splendens]	cellular component: cell (GO:0005623);; cellular component: organelle (GO:0043226);; cellular component: organelle part (GO:0044422);; cellular component: cell part (GO:0044464);; molecular function: binding (GO:0005488);; molecular function: catalytic activity (GO:0003824);; biological process: metabolic process (GO:0008152);; biological process: cellular process (GO:0009987)	--	--
c45768.graph_c0	0.15	0	0.29	0.15	0	0.6	0	0.2	0.5	0	0	0.17	0	0.27	0.13	0.13	0.33	0.5	0	0.28	0.14	0.4	0.23	0.15	0.13	0.15	0	0.09	--	--	--	--	--	--	--	--	--	--	--	--
c51413.graph_c1	0	0	0	0	0	0	0	0	0	0	0	0	0	0	0	0	0	0	0	0	0	0	0	0	0	0	0	0	--	--	--	--	--	--	--	--	--	--	--	--
c40670.graph_c0	0	0	0	0	0	0	0	0	0	0	0	0	0	0	0	0	0	0	0	0	0	0	0	0	0	0	0	0	--	--	--	--	--	Protein EXORDIUM-like 5 OS=Arabidopsis thaliana OX=3702 GN=EXL5 PE=2 SV=1	Uncharacterized protein OS=Camellia sinensis var. sinensis OX=542762 GN=TEA_019470 PE=4 SV=1	Function unknown	hypothetical protein HYC85_009398 [Camellia sinensis]	--	--	--
c91912.graph_c0	0	0	0	0	0	0	0	0	0.97	0	0	0.32	0	0	0	0	0	0	0	0	0	0	0	0	0	0	0	0	--	--	--	--	--	--	--	--	--	--	--	--
c69211.graph_c0	21.01	13.08	18.8	17.63	19.85	17.2	21.87	19.64	22.01	17.48	21.97	20.49	15.51	22.71	34.68	24.3	17.9	21.23	25.79	21.64	21.12	26.56	24.37	25.44	25.04	21.54	23.69	23.42	--	--	K02995|3.5e-08|adu:107464504|K02995 small subunit ribosomal protein S8e | (RefSeq) 40S ribosomal protein S8	--	Protein of unknown function (DUF 659)	--	DUF659 domain-containing protein OS=Arabidopsis lyrata subsp. lyrata OX=81972 GN=ARALYDRAFT_338073 PE=4 SV=1	Function unknown	uncharacterized protein LOC110802709 [Spinacia oleracea]	--	Ribosome (ko03010)	LOC110802709
c20646.graph_c0	0	0	0	0	0	0	0	0	0	0	0	0	0	0	0	0	0	0	0	0	0	0	0	0	0	0	0	0	--	--	--	--	--	--	--	--	--	--	--	--
c87550.graph_c0	0	0	0	0	0	0	0	0	0	0	0	0	0	0	0	0	0	0	0	0	0	0	0	0	0	0	0	0	--	--	--	--	--	--	--	--	--	--	--	--
c23125.graph_c0	0	0.41	0	0.14	0	0.23	0	0.08	0	0	0	0	0	0.2	0	0.07	0	0	0	0	1.26	0	0.49	0.21	0	0.85	0	0.28	--	--	--	--	--	--	--	--	--	--	--	--
c109683.graph_c0	0	0	0	0	0	0	0	0	0	0	0	0	0	0	0	0	0	0	0	0	0	0	0	0	0	0	0	0	Energy production and conversion	Cellular Component: mitochondrion (GO:0005739);; Molecular Function: oxidoreductase activity, acting on NAD(P)H (GO:0016651);; Molecular Function: quinone binding (GO:0048038);; Molecular Function: NAD binding (GO:0051287);;	K03935|1.9e-18|qsu:112013376|K03935 NADH dehydrogenase (ubiquinone) Fe-S protein 2 [EC:7.1.1.2] | (RefSeq) NADH-ubiquinone oxidoreductase 49 kDa subunit, mitochondrial-like	Energy production and conversion	--	NADH dehydrogenase [ubiquinone] iron-sulfur protein 2 OS=Nephroselmis olivacea OX=31312 GN=NAD7 PE=3 SV=1	NADH dehydrogenase subunit 7 OS=Lotharella oceanica OX=641309 GN=nad7 PE=3 SV=1	Energy production and conversion	NADH-ubiquinone oxidoreductase 49 kDa subunit-like [Rhodamnia argentea]	cellular component: cell (GO:0005623);; cellular component: organelle (GO:0043226);; cellular component: cell part (GO:0044464);; molecular function: catalytic activity (GO:0003824);; biological process: metabolic process (GO:0008152);; biological process: single-organism process (GO:0044699);; molecular function: binding (GO:0005488)	Oxidative phosphorylation (ko00190)	LOC115754433
c81555.graph_c0	12.76	13.86	16.51	14.38	14.38	11.49	15.73	13.87	14.63	14.21	14.75	14.53	15.68	15.34	14.97	15.33	13.79	16.59	19.43	16.6	16.49	15.83	16.4	16.88	15	15.44	16.1	15.51	Replication, recombination and repair	Biological Process: regulation of transcription, DNA-templated (GO:0006355);; Molecular Function: metal ion binding (GO:0046872);;	--	--	C-terminal domain on Strawberry notch homologue	Protein FORGETTER 1 OS=Arabidopsis thaliana OX=3702 GN=FGT1 PE=1 SV=1	PHD-type domain-containing protein OS=Salvia splendens OX=180675 GN=Saspl_001380 PE=3 SV=1	--	protein FORGETTER 1 isoform X1 [Sesamum indicum]	biological process: biological regulation (GO:0065007);; molecular function: binding (GO:0005488)	--	LOC105175184
c53322.graph_c1	0.61	0.68	0.27	0.52	0.11	0.24	0.11	0.15	0.41	0	0.24	0.22	0.67	0.22	0.21	0.37	0	0.3	0	0.1	0.94	0	0.55	0.72	0.43	1.16	1.48	1.02	--	--	--	--	--	--	--	--	--	--	--	--
c110872.graph_c0	0	0	0	0	0	0	0	0	0	1.2	0	0.4	0	0	0	0	0	0	0	0	0	0	0	0	0	0	0	0	Posttranslational modification, protein turnover, chaperones	Molecular Function: threonine-type endopeptidase activity (GO:0004298);; Cellular Component: nucleus (GO:0005634);; Cellular Component: cytoplasm (GO:0005737);; Biological Process: ubiquitin-dependent protein catabolic process (GO:0006511);; Cellular Component: proteasome core complex, alpha-subunit complex (GO:0019773);;	K02728|1.6e-24|nnu:104599160|K02728 20S proteasome subunit alpha 3 [EC:3.4.25.1] | (RefSeq) proteasome subunit alpha type-4-like	Posttranslational modification, protein turnover, chaperones	Proteasome subunit A N-terminal signature;; Proteasome subunit	Proteasome subunit alpha type-4-A OS=Arabidopsis thaliana OX=3702 GN=PAC1 PE=1 SV=1	Proteasome subunit alpha type OS=Nelumbo nucifera OX=4432 GN=LOC104601560 PE=3 SV=1	Posttranslational modification, protein turnover, chaperones	Proteasome subunit alpha type-4-A, partial [Mucuna pruriens]	molecular function: catalytic activity (GO:0003824);; biological process: metabolic process (GO:0008152);; cellular component: cell (GO:0005623);; cellular component: organelle (GO:0043226);; cellular component: cell part (GO:0044464);; biological process: cellular process (GO:0009987);; cellular component: macromolecular complex (GO:0032991)	Proteasome (ko03050)	--
c75834.graph_c0	281.69	378.95	247.96	302.87	265.94	243.05	234.56	247.85	335.36	361.57	291.66	329.53	244.21	251.19	382.95	292.78	290.66	281.31	186.57	252.85	263.79	253.27	257.82	256.39	298.89	373.68	241.41	304.66	Coenzyme transport and metabolism	Molecular Function: iron ion binding (GO:0005506);; Cellular Component: cytosol (GO:0005829);; Biological Process: thiamine biosynthetic process (GO:0009228);; Cellular Component: chloroplast stroma (GO:0009570);; Molecular Function: transferase activity, transferring pentosyl groups (GO:0016763);; Biological Process: thiazole biosynthetic process (GO:0052837);;	K03146|4.3e-176|sind:105167970|K03146 cysteine-dependent adenosine diphosphate thiazole synthase [EC:2.4.2.60] | (RefSeq) thiamine thiazole synthase 2, chloroplastic-like	General function prediction only	Thi4 family;; FAD dependent oxidoreductase;; FAD binding domain;; NAD(P)-binding Rossmann-like domain;; Lycopene cyclase protein;; GMC oxidoreductase	Thiamine thiazole synthase 2, chloroplastic OS=Vitis vinifera OX=29760 GN=THI1-2 PE=3 SV=1	Thiamine thiazole synthase, chloroplastic OS=Salvia splendens OX=180675 GN=THI4 PE=3 SV=1	Coenzyme transport and metabolism	thiamine thiazole synthase 2, chloroplastic-like [Sesamum indicum]	molecular function: binding (GO:0005488);; cellular component: cell (GO:0005623);; cellular component: cell part (GO:0044464);; biological process: metabolic process (GO:0008152);; biological process: cellular process (GO:0009987);; biological process: single-organism process (GO:0044699);; cellular component: organelle (GO:0043226);; cellular component: organelle part (GO:0044422);; molecular fu…	Thiamine metabolism (ko00730)	LOC105167970
c64710.graph_c3	0	0	0	0	0	0	0	0	0	0	0	0	0	0	0	0	1.59	0	0	0.53	0	0	0	0	0	0	0.74	0.25	--	Molecular Function: carboxypeptidase activity (GO:0004180);; Molecular Function: zinc ion binding (GO:0008270);; Molecular Function: ligase activity (GO:0016874);; Molecular Function: ubiquitin protein ligase activity (GO:0061630);; Biological Process: ubiquitin-dependent protein catabolic process via the N-end rule pathway (GO:0071596);;	--	Posttranslational modification, protein turnover, chaperones	--	E3 ubiquitin-protein ligase PRT6 OS=Arabidopsis thaliana OX=3702 GN=PRT6 PE=1 SV=1	E3 ubiquitin-protein ligase OS=Handroanthus impetiginosus OX=429701 GN=CDL12_24437 PE=3 SV=1	Posttranslational modification, protein turnover, chaperones	putative ubiquitin-protein ligase of the N-recognin family [Handroanthus impetiginosus]	molecular function: catalytic activity (GO:0003824);; biological process: metabolic process (GO:0008152);; molecular function: binding (GO:0005488);; biological process: cellular process (GO:0009987)	--	--
c103374.graph_c0	0	0	0	0	0	0	0	0	0	1.43	0	0.48	0	0	0	0	0	0	0	0	0	0	0	0	0	0	0	0	--	--	--	--	--	--	--	--	protein argonaute 18-like [Rhodamnia argentea]	--	--	LOC115756894
c1064.graph_c0	0	0	0	0	0	0	0	0	0	0	0	0	0	0	0	0	0	0	0	0	0	0	0	0	0	0	4.2	1.4	--	--	--	--	--	--	--	--	--	--	--	--
c79555.graph_c0	647.21	776.73	519.14	647.69	564.88	558.74	649.57	591.06	612.9	594.85	566.03	591.26	567.91	523.76	637.67	576.45	390.62	398.96	266.65	352.08	330.98	335.59	361.05	416.57	386.3	365.73	393.02	381.68	--	Cellular Component: integral component of membrane (GO:0016021);;	--	--	--	--	Uncharacterized protein OS=Erythranthe guttata OX=4155 GN=MIMGU_mgv1a007636mg PE=4 SV=1	--	PREDICTED: uncharacterized protein LOC105953545 [Erythranthe guttata]	cellular component: membrane (GO:0016020);; cellular component: membrane part (GO:0044425)	--	--
c17588.graph_c0	0	0	0	0	0	0	0	0	0	0	0	0	0	0	0	0	0	0	0	0	0	0	0	0	0	0	0	0	--	--	K22804|9.1e-14|bna:106442438|K22804 structural maintenance of chromosomes protein 6 | (RefSeq) structural maintenance of chromosomes protein 6B-like	General function prediction only	--	Uncharacterized mitochondrial protein AtMg00310 OS=Arabidopsis thaliana OX=3702 GN=AtMg00310 PE=4 SV=1	Reverse transcriptase domain-containing protein OS=Salvia splendens OX=180675 GN=Saspl_019745 PE=4 SV=1	Function unknown	hypothetical protein Saspl_019745 [Salvia splendens]	--	--	--
c69576.graph_c2	0	0	0.19	0.06	0	0.2	0	0.07	0.17	0	0	0.06	0	0.55	0	0.18	0	0	0.32	0.11	0	0	0	0	0	0	0.18	0.06	--	--	--	--	--	--	--	--	--	--	--	--
c79109.graph_c0	0.96	0.55	1.47	0.99	1.73	0.71	0.21	0.88	0.61	0.63	0.07	0.44	1.07	0.53	0.32	0.64	1.05	0.55	1.36	0.99	0.71	1.04	0.97	1.15	0.19	0.42	0.27	0.29	--	Biological Process: mitotic spindle assembly checkpoint (GO:0007094);;	K02178|4.9e-177|sind:105158854|K02178 checkpoint serine/threonine-protein kinase [EC:2.7.11.1] | (RefSeq) mitotic spindle checkpoint protein BUBR1 isoform X1	Cell cycle control, cell division, chromosome partitioning	Mad3/BUB1 homology region 1	Mitotic spindle checkpoint protein BUBR1 OS=Arabidopsis thaliana OX=3702 GN=BUBR1 PE=1 SV=2	BUB1 N-terminal domain-containing protein OS=Salvia splendens OX=180675 GN=Saspl_002608 PE=4 SV=1	Cell cycle control, cell division, chromosome partitioning	hypothetical protein Saspl_002608 [Salvia splendens]	biological process: cellular process (GO:0009987);; biological process: single-organism process (GO:0044699);; biological process: biological regulation (GO:0065007)	--	--
c51822.graph_c0	0.29	0.47	0.35	0.37	0.39	0.21	0.07	0.22	0.12	0.06	1	0.39	0.27	0.39	0.45	0.37	0.44	0.3	0.7	0.48	0.42	0.45	0.46	0.5	0.63	0.21	0.4	0.41	--	--	K16578|3.8e-36|nau:109222079|K16578 CLIP-associating protein 1/2 | (RefSeq) CLIP-associated protein-like	--	zinc-binding in reverse transcriptase	--	Putative ribonuclease H protein At1g65750 family (Fragment) OS=Cajanus cajan OX=3821 GN=KK1_017039 PE=4 SV=1	Function unknown	PREDICTED: uncharacterized protein LOC109329191 [Lupinus angustifolius]	--	--	--
c99334.graph_c0	0	0	0	0	0	0	0	0	0	0	0	0	0	0	0	0	0	0	0	0	0	0	0	0	0	0	0	0	--	--	--	--	--	--	--	--	--	--	--	--
c55285.graph_c1	0	0	0	0	0	0	0	0	0	0	0	0	0	0	0	0	0	0	0	0	0	0	0	0	1.13	0	0	0.38	--	Molecular Function: catalytic activity (GO:0003824);; Biological Process: base-excision repair (GO:0006284);; Molecular Function: 4 iron, 4 sulfur cluster binding (GO:0051539);;	--	--	--	--	DEMETER-like DNA glycosylase OS=Salvia miltiorrhiza OX=226208 GN=DML1 PE=3 SV=1	--	DEMETER-like DNA glycosylase [Salvia miltiorrhiza]	molecular function: catalytic activity (GO:0003824);; biological process: metabolic process (GO:0008152);; biological process: cellular process (GO:0009987);; biological process: response to stimulus (GO:0050896);; molecular function: binding (GO:0005488)	--	--
c79343.graph_c0	26.96	23.35	32.01	27.44	28.39	28.84	27.69	28.31	28.56	24.45	32.41	28.47	30.24	27.49	26.7	28.14	22.95	27.29	32.82	27.69	31.18	32.27	32.16	33.04	33.96	31.92	29.47	31.78	Signal transduction mechanisms	Molecular Function: acid phosphatase activity (GO:0003993);; Molecular Function: metal ion binding (GO:0046872);;	K22390|5.5e-203|sind:105176699|K22390 acid phosphatase type 7 | (RefSeq) purple acid phosphatase 18	Carbohydrate transport and metabolism	Calcineurin-like phosphoesterase;; Purple acid Phosphatase, N-terminal domain;; Iron/zinc purple acid phosphatase-like protein C	Purple acid phosphatase 18 OS=Arabidopsis thaliana OX=3702 GN=PAP18 PE=2 SV=1	Purple acid phosphatase OS=Salvia splendens OX=180675 GN=Saspl_036380 PE=3 SV=1	Carbohydrate transport and metabolism	hypothetical protein Saspl_036380 [Salvia splendens]	molecular function: catalytic activity (GO:0003824);; biological process: metabolic process (GO:0008152);; biological process: cellular process (GO:0009987);; molecular function: binding (GO:0005488)	--	--
c109033.graph_c0	0	0	0	0	0	0	0	0	0	3.23	0	1.08	0	0	0	0	0	0	0	0	0	0	0	0	0	0	0	0	--	--	--	--	--	--	--	--	--	--	--	--
c73976.graph_c0	0.59	1.26	0.67	0.84	0.58	0.39	0.88	0.62	0.63	0.85	0.63	0.7	0.7	0.72	0.67	0.7	1.06	0.98	0.75	0.93	0.34	0.62	0.47	0.46	0.61	0.34	0.38	0.44	--	Cellular Component: retrotransposon nucleocapsid (GO:0000943);; Molecular Function: molecular_function (GO:0003674);; Molecular Function: nucleic acid binding (GO:0003676);; Molecular Function: RNA binding (GO:0003723);; Molecular Function: catalytic activity (GO:0003824);; Molecular Function: DNA-directed DNA polymerase activity (GO:0003887);; Molecular Function: RNA-directed DNA polymerase acti…	K04125|6.6e-27|boe:106319842|K04125 gibberellin 2beta-dioxygenase [EC:1.14.11.13] | (RefSeq) gibberellin 2-beta-dioxygenase 7	General function prediction only	Retroviral aspartyl protease;; gag-polyprotein putative aspartyl protease;; Aspartyl protease;; Retrotransposon gag protein	--	Two-component response regulator ARR-B family OS=Salvia splendens OX=180675 GN=ARR-B PE=4 SV=1	Amino acid transport and metabolism	two-component response regulator ARR-B family [Salvia splendens]	cellular component: cell (GO:0005623);; cellular component: organelle (GO:0043226);; cellular component: organelle part (GO:0044422);; cellular component: cell part (GO:0044464);; molecular function: binding (GO:0005488);; molecular function: catalytic activity (GO:0003824);; biological process: metabolic process (GO:0008152);; biological process: cellular process (GO:0009987);; biological proces…	Diterpenoid biosynthesis (ko00904)	--
c88163.graph_c0	0	0	0	0	0	0	0	0	0	0	0	0	0	0	0	0	0	2.81	0	0.94	0	1.58	0.53	0	1.58	0	0	0.53	--	--	--	--	--	--	--	--	--	--	--	--
c22607.graph_c0	0	0.54	0	0.18	0	0	0	0	0	0	1.07	0.36	0	0	0	0	0	0	0	0	0.55	1.54	0.88	0.54	0	0	0	0	--	Molecular Function: RNA-directed DNA polymerase activity (GO:0003964);;	K09571|1.1e-32|qsu:112039090|K09571 FK506-binding protein 4/5 [EC:5.2.1.8] | (RefSeq) LOW QUALITY PROTEIN: peptidyl-prolyl cis-trans isomerase FKBP65-like	General function prediction only	--	Retrovirus-related Pol polyprotein from transposon TNT 1-94 OS=Nicotiana tabacum OX=4097 PE=2 SV=1	Reverse transcriptase, RNA-dependent DNA polymerase OS=Corchorus capsularis OX=210143 GN=CCACVL1_02672 PE=4 SV=1	Replication, recombination and repair	uncharacterized protein LOC110012423 [Sesamum indicum]	molecular function: catalytic activity (GO:0003824);; biological process: metabolic process (GO:0008152);; biological process: cellular process (GO:0009987)	--	--
c88348.graph_c0	2.89	0	0	0.96	0	0	0	0	0	0.79	0	0.26	0	0	0	0	0	0	1.44	0.48	0	1.72	0.87	0.89	3.44	0.98	0	1.47	--	--	--	--	--	--	--	--	--	--	--	--
c73813.graph_c1	4.57	3.83	5.39	4.6	4.54	4.05	5.33	4.64	5.39	4.33	5.94	5.22	4.68	5.39	6.36	5.48	5.31	6.33	6.96	6.2	6.33	8.2	7.04	6.6	5.69	6.93	8.17	6.93	--	Molecular Function: DNA binding (GO:0003677);; Cellular Component: nucleus (GO:0005634);; Molecular Function: zinc ion binding (GO:0008270);;	K09287|3.8e-06|ats:109750367|K09287 RAV-like factor | (RefSeq) LOC109750367; AP2/ERF and B3 domain-containing protein Os01g0141000-like	--	--	B3 domain-containing protein Os07g0679700 OS=Oryza sativa subsp. japonica OX=39947 GN=Os07g0679700 PE=2 SV=1	Uncharacterized protein OS=Salvia splendens OX=180675 GN=Saspl_042874 PE=4 SV=1	Transcription	hypothetical protein Saspl_042874 [Salvia splendens]	molecular function: binding (GO:0005488);; cellular component: cell (GO:0005623);; cellular component: organelle (GO:0043226);; cellular component: cell part (GO:0044464)	--	--
c109826.graph_c0	0	0	0	0	0	0	0	0	0	0	0	0	0	0	0	0	0	0	0	0	1.01	0	0.34	0	0	0	0	0	--	--	--	--	--	--	--	--	--	--	--	--
c27719.graph_c1	1.44	0	0	0.48	0	0	0	0	0	1.17	0	0.39	0	6.65	0	2.22	2.71	0	1.06	1.26	0	0	0.44	1.32	0	0	0	0	--	Molecular Function: monooxygenase activity (GO:0004497);; Molecular Function: iron ion binding (GO:0005506);; Molecular Function: oxidoreductase activity, acting on paired donors, with incorporation or reduction of molecular oxygen (GO:0016705);; Molecular Function: heme binding (GO:0020037);;	K12153|4.5e-25|egr:104420179|K12153 phenylalanine N-monooxygenase [EC:1.14.14.40] | (RefSeq) tyrosine N-monooxygenase	Secondary metabolites biosynthesis, transport and catabolism	Cytochrome P450	Valine N-monooxygenase 2 OS=Manihot esculenta OX=3983 GN=CYP79D2 PE=1 SV=1	Phenylalanine N-monooxygenase OS=Salvia splendens OX=180675 GN=CYP79A2 PE=3 SV=1	Secondary metabolites biosynthesis, transport and catabolism	phenylalanine N-monooxygenase [Salvia splendens]	molecular function: catalytic activity (GO:0003824);; biological process: metabolic process (GO:0008152);; biological process: single-organism process (GO:0044699);; molecular function: binding (GO:0005488)	Cyanoamino acid metabolism (ko00460);; Glucosinolate biosynthesis (ko00966);; 2-Oxocarboxylic acid metabolism (ko01210)	--
c92007.graph_c0	0	2.01	0	0.67	0	0	0	0	0	0	0	0	0	0	0	0	0	0	0	0	0	0	0	0	0	0	0	0	--	--	--	--	--	--	--	--	--	--	--	--
c96709.graph_c0	1.26	0	0	0.42	0	0	0	0	0	0.52	0	0.17	0	0	0	0	0	0	0	0	0	0	0	0	0	0	0.57	0.19	--	--	--	--	--	--	--	--	--	--	--	--
c80215.graph_c0	22.31	24.12	20.7	22.38	21.61	17.86	20.59	20.02	22.22	20.95	17.31	20.16	16.15	16.9	22.12	18.39	28.06	23.84	20.01	23.97	22.76	22.48	23.41	25	27.78	34.34	23.65	28.59	Amino acid transport and metabolism	Biological Process: histidine biosynthetic process (GO:0000105);; Molecular Function: histidinol-phosphate transaminase activity (GO:0004400);; Molecular Function: pyridoxal phosphate binding (GO:0030170);;	K00817|1.2e-210|sind:105168185|K00817 histidinol-phosphate aminotransferase [EC:2.6.1.9] | (RefSeq) LOW QUALITY PROTEIN: histidinol-phosphate aminotransferase, chloroplastic-like	Amino acid transport and metabolism	Aminotransferase class I and II	Histidinol-phosphate aminotransferase, chloroplastic OS=Nicotiana plumbaginifolia OX=4092 GN=HPA PE=1 SV=1	Histidinol-phosphate aminotransferase OS=Salvia splendens OX=180675 GN=hisC PE=3 SV=1	Amino acid transport and metabolism	histidinol-phosphate aminotransferase [Salvia splendens]	biological process: metabolic process (GO:0008152);; biological process: cellular process (GO:0009987);; biological process: single-organism process (GO:0044699);; molecular function: catalytic activity (GO:0003824);; molecular function: binding (GO:0005488)	Histidine metabolism (ko00340);; Tyrosine metabolism (ko00350);; Phenylalanine metabolism (ko00360);; Phenylalanine, tyrosine and tryptophan biosynthesis (ko00400);; Tropane, piperidine and pyridine alkaloid biosynthesis (ko00960);; Biosynthesis of amino acids (ko01230)	--
c75784.graph_c0	3.83	6.4	7.28	5.84	6.32	5.17	6.68	6.06	8.98	4.23	6.46	6.56	6.01	7.77	14.72	9.5	5.06	4.86	2.71	4.21	5.47	3.26	3.66	2.26	5.29	3.25	6.7	5.08	Transcription	Molecular Function: DNA-binding transcription factor activity (GO:0003700);; Biological Process: DNA-templated transcription, initiation (GO:0006352);;	K03093|1.6e-14|pop:7462282|K03093 RNA polymerase sigma factor | (RefSeq) RNA polymerase sigma factor sigC	--	Sigma-70 region 2	RNA polymerase sigma factor sigD, chloroplastic OS=Arabidopsis thaliana OX=3702 GN=SIGD PE=2 SV=1	RNA polymerase primary sigma factor OS=Salvia splendens OX=180675 GN=SIG1 PE=3 SV=1	Transcription	RNA polymerase primary sigma factor [Salvia splendens]	molecular function: nucleic acid binding transcription factor activity (GO:0001071);; biological process: biological regulation (GO:0065007);; biological process: metabolic process (GO:0008152);; biological process: cellular process (GO:0009987)	--	--
c114030.graph_c0	0	0	0	0	0	0	0	0	0	0	0	0	0	0	0	0	0	0	0	0	0	0	0	0	0	0	0	0	--	--	--	--	--	--	--	--	--	--	--	--
c24420.graph_c0	0	0	0	0	0	0	0	0	0	0	0	0	0	0	0	0	0	0	0	0	0	0	0	0	0	0	0	0	--	--	--	--	--	--	--	--	--	--	--	--
c111802.graph_c0	0	0	0	0	0	0	0	0	0	0	0	0	0	0	0	0	0	0	0	0	0	0	0	0	0	0	0	0	Cell wall/membrane/envelope biogenesis	--	--	--	--	Protein CDI OS=Arabidopsis thaliana OX=3702 GN=CDI PE=2 SV=1	Uncharacterized protein OS=Camellia sinensis var. sinensis OX=542762 GN=TEA_005734 PE=4 SV=1	--	hypothetical protein HYC85_004333 [Camellia sinensis]	--	--	--
c25824.graph_c1	0	0	0	0	0	0	0	0	0	0	0	0	0.86	0	0	0.29	0	0	0	0	0	0	0	0	0	0	0	0	--	--	--	--	--	--	--	--	--	--	--	--
c82883.graph_c2	0.8	0.9	0.59	0.76	0.44	1.07	0.89	0.8	0.93	0.78	1.11	0.94	0.8	0.85	0.95	0.87	0.67	0.64	0.95	0.75	0.54	0.83	0.79	0.99	0.65	0.59	0.64	0.63	Replication, recombination and repair	Molecular Function: ATP binding (GO:0005524);; Biological Process: mismatch repair (GO:0006298);; Molecular Function: mismatched DNA binding (GO:0030983);;	K08737|0.0e+00|sind:105162107|K08737 DNA mismatch repair protein MSH6 | (RefSeq) DNA mismatch repair protein MSH7 isoform X2	Replication, recombination and repair	MutS domain V;; MutS domain III;; MutS domain I;; MutS domain II	DNA mismatch repair protein MSH7 OS=Arabidopsis thaliana OX=3702 GN=MSH7 PE=1 SV=1	DNA mismatch repair protein MutS OS=Salvia splendens OX=180675 GN=mutS PE=4 SV=1	Replication, recombination and repair	DNA mismatch repair protein MutS [Salvia splendens]	molecular function: binding (GO:0005488);; biological process: metabolic process (GO:0008152);; biological process: cellular process (GO:0009987);; biological process: response to stimulus (GO:0050896)	Mismatch repair (ko03430)	--
c106336.graph_c0	0	0	0	0	0	0	0	0	0	0	0	0	0	0	0	0	0	0	0	0	0	0	0	0	0	0	0	0	--	--	--	--	--	--	--	--	--	--	--	--
c51442.graph_c0	2.09	0	4.97	2.35	1.92	4.15	4.83	3.63	1.79	6.85	2.83	3.82	4.53	6.83	2.61	4.66	4.7	2.5	2.33	3.18	2.92	2.8	2.87	2.9	10.28	4.28	2.85	5.8	General function prediction only	Molecular Function: ATP binding (GO:0005524);; Molecular Function: ATPase activity (GO:0016887);;	K06185|8.9e-14|mis:MICPUN_98118|K06185 ATP-binding cassette, subfamily F, member 2 | (RefSeq) ATP-binding cassette superfamily	General function prediction only	ABC transporter	ABC transporter F family member 2 OS=Arabidopsis thaliana OX=3702 GN=ABCF2 PE=3 SV=2	ATP-binding cassette, subfamily F, member 3 OS=Salvia splendens OX=180675 GN=ABCF3 PE=4 SV=1	Function unknown	ATP-binding cassette, subfamily F, member 3 [Salvia splendens]	molecular function: binding (GO:0005488);; molecular function: catalytic activity (GO:0003824)	--	--
c95088.graph_c0	0	0	0	0	0	0	1.28	0.43	0	0	0	0	0	0	0	0	0	0	1.02	0.34	0	0	0	0	0	0	0	0	--	--	--	--	--	--	FBD domain-containing protein (Fragment) OS=Erythranthe guttata OX=4155 GN=MIMGU_mgv1a025644mg PE=4 SV=1	Function unknown	PREDICTED: F-box protein At5g03100-like [Erythranthe guttata]	--	--	LOC105960459
c41524.graph_c0	0	0	0	0	0.35	0	0	0.12	0	0	0	0	0	0	0	0	0.27	0	0	0.09	1.11	0.35	0.49	0	1.38	1.15	0	0.84	--	--	--	--	--	--	--	--	--	--	--	--
c70262.graph_c0	10.1	11.22	11.13	10.82	9.15	9.75	9.4	9.43	10.68	7.53	7.84	8.68	10.81	9.16	8.68	9.55	10.35	9.06	10.1	9.84	12.78	9.93	12.2	13.88	12.45	12.84	11.83	12.37	--	--	--	--	--	Polyadenylate-binding protein-interacting protein 6 OS=Arabidopsis thaliana OX=3702 GN=CID6 PE=2 SV=1	CUE domain-containing protein OS=Salvia splendens OX=180675 GN=Saspl_010346 PE=4 SV=1	Function unknown	hypothetical protein Saspl_010346 [Salvia splendens]	--	--	--
c59394.graph_c1	0	0.12	0.24	0.12	0	0.12	0.23	0.12	0.31	0	0	0.1	0	0	0.11	0.04	0	0	0.1	0.03	0.12	0	0.2	0.48	0	0.12	0.35	0.16	--	Molecular Function: RNA-directed DNA polymerase activity (GO:0003964);;	K10393|1.6e-59|nta:107828690|K10393 kinesin family member 2/24 | (RefSeq) kinesin-13A-like	General function prediction only	zinc-binding in reverse transcriptase	--	Putative RNA-directed DNA polymerase OS=Medicago truncatula OX=3880 GN=MtrunA17_Chr6g0450501 PE=4 SV=1	Defense mechanisms	PREDICTED: uncharacterized protein LOC109209643 [Nicotiana attenuata]	molecular function: catalytic activity (GO:0003824);; biological process: metabolic process (GO:0008152);; biological process: cellular process (GO:0009987)	--	LOC109209643
c45900.graph_c0	0.32	0.5	0.31	0.38	1.17	0	0	0.39	0.62	0.46	0.21	0.43	0.59	0.29	0.75	0.54	0.24	0.27	1.29	0.6	1.14	1.05	0.84	0.32	0.38	0.31	0.2	0.3	--	--	--	--	--	--	--	--	--	--	--	--
c70012.graph_c4	0	0	0	0	0	0	0	0	0	0	0	0	0	0	0	0	0	0	0	0	0	0	0	0	0	0	0	0	--	--	--	--	--	--	--	--	--	--	--	--
c24252.graph_c0	0	0.29	0.3	0.2	0	0	0	0	0	0	0	0	0	0	0	0	0	0	0.98	0.33	0	0	0	0	0	0	0	0	--	--	--	--	--	--	--	--	--	--	--	--
c91448.graph_c0	0	0	0	0	0	0	0	0	0	1.16	0	0.39	0	0	0	0	0	0	0	0	0	0	0	0	0	0	0	0	--	Cellular Component: nucleosome (GO:0000786);; Molecular Function: DNA binding (GO:0003677);; Cellular Component: nucleus (GO:0005634);; Molecular Function: protein heterodimerization activity (GO:0046982);;	K11252|7.6e-33|lang:109341945|K11252 histone H2B | (RefSeq) histone H2B	Chromatin structure and dynamics	Core histone H2A/H2B/H3/H4;; Histone-like transcription factor (CBF/NF-Y) and archaeal histone;; Transcription initiation factor TFIID subunit A	Histone H2B OS=Olisthodiscus luteus OX=83000 PE=1 SV=2	Histone H2B OS=Arabis alpina OX=50452 GN=AALP_AAs74787U000100 PE=3 SV=1	Chromatin structure and dynamics	PREDICTED: histone H2B [Oryza brachyantha]	cellular component: cell (GO:0005623);; cellular component: macromolecular complex (GO:0032991);; cellular component: organelle (GO:0043226);; cellular component: organelle part (GO:0044422);; cellular component: cell part (GO:0044464);; molecular function: binding (GO:0005488)	--	--
c8853.graph_c0	0	0	0	0	0	1.27	0	0.42	0.83	0	0	0.28	0	0	0	0	0	0	1.45	0.48	0.91	0	0.6	0.9	0	0	0	0	--	--	--	--	--	--	--	--	--	--	--	--
c62751.graph_c0	0.5	0.08	1.16	0.58	1.22	0.17	0.21	0.53	0.56	0.37	0	0.31	0.21	0.19	0.4	0.27	0.75	0.13	1.83	0.9	2.86	0.83	1.45	0.67	0.66	0.15	0.79	0.53	--	Biological Process: defense response (GO:0006952);; Molecular Function: ADP binding (GO:0043531);;	K13457|3.7e-07|egu:105039042|K13457 disease resistance protein RPM1 | (RefSeq) disease resistance protein RPM1-like	Signal transduction mechanisms	--	Putative disease resistance RPP13-like protein 3 OS=Arabidopsis thaliana OX=3702 GN=RPP13L3 PE=3 SV=1	Disease resistance protein RPM1 OS=Salvia splendens OX=180675 GN=RPM1 PE=4 SV=1	Signal transduction mechanisms	disease resistance protein RPM1 [Salvia splendens]	biological process: response to stimulus (GO:0050896);; molecular function: binding (GO:0005488)	Plant-pathogen interaction (ko04626)	--
c57568.graph_c0	1.49	1.04	1.06	1.2	1.02	0.84	1.39	1.08	3.76	1.25	1.77	2.26	1.33	1.07	0.96	1.12	1.31	0.91	0.58	0.93	0.71	2.32	2.67	4.97	0.66	0.73	0	0.46	--	--	--	--	--	--	--	--	--	--	--	--
c26119.graph_c0	0	0	0.22	0.07	0.21	0	0	0.07	0.2	0	0	0.07	0	4.18	0.2	1.46	0.51	1.55	0.56	0.87	0	1.05	0.35	0	0.62	2.07	1.09	1.26	--	Cellular Component: integral component of membrane (GO:0016021);;	--	--	--	--	Uncharacterized protein OS=Salvia splendens OX=180675 GN=Saspl_022886 PE=4 SV=1	--	hypothetical protein Saspl_022886 [Salvia splendens]	cellular component: membrane (GO:0016020);; cellular component: membrane part (GO:0044425)	--	--
c114582.graph_c0	0	0	0	0	0	0	0	0	0	0	0	0	0	0	0	0	0	2.38	0	0.79	0	0	0	0	0	0	0	0	--	--	--	--	--	--	--	--	--	--	--	--
c57661.graph_c1	0	0	0	0	0	0	0	0	0	0	0	0	0	0	0	0	0	0	0	0	0	0	0	0	0	0	0	0	--	Biological Process: lipid transport (GO:0006869);; Molecular Function: lipid binding (GO:0008289);;	--	--	Probable lipid transfer;; Protease inhibitor/seed storage/LTP family	--	AAI domain-containing protein OS=Handroanthus impetiginosus OX=429701 GN=CDL12_07842 PE=3 SV=1	Posttranslational modification, protein turnover, chaperones	hypothetical protein CDL12_07842 [Handroanthus impetiginosus]	biological process: single-organism process (GO:0044699);; biological process: localization (GO:0051179);; molecular function: binding (GO:0005488)	--	--
c77702.graph_c0	17.19	16.89	12.65	15.58	16.34	13.29	11.2	13.61	17.31	18.73	15.25	17.1	13.92	15.98	18.09	16	20.89	23.43	16.72	20.35	17.15	19.97	18.86	19.45	22.96	28.36	18.43	23.25	--	Molecular Function: AT DNA binding (GO:0003680);; Cellular Component: nucleus (GO:0005634);;	--	--	Plants and Prokaryotes Conserved (PCC) domain;; AT hook motif	AT-hook motif nuclear-localized protein 10 OS=Arabidopsis thaliana OX=3702 GN=AHL10 PE=1 SV=2	AT-hook motif nuclear-localized protein OS=Striga asiatica OX=4170 GN=STAS_13366 PE=4 SV=1	Transcription	AT hook motif DNA-binding family protein [Striga asiatica]	molecular function: binding (GO:0005488);; cellular component: cell (GO:0005623);; cellular component: organelle (GO:0043226);; cellular component: cell part (GO:0044464)	--	--
c44620.graph_c0	0	0	0	0	0	0	0	0	0	0	0	0	0	0	0	0	0	0	0	0	0	0	0	0	0	0	0	0	--	Molecular Function: monooxygenase activity (GO:0004497);; Molecular Function: iron ion binding (GO:0005506);; Molecular Function: oxidoreductase activity, acting on paired donors, with incorporation or reduction of molecular oxygen (GO:0016705);; Molecular Function: heme binding (GO:0020037);;	K01723|3.3e-15|qsu:111993945|K01723 hydroperoxide dehydratase [EC:4.2.1.92] | (RefSeq) allene oxide synthase 3-like	--	--	Allene oxide synthase 3 OS=Solanum lycopersicum OX=4081 GN=AOS3 PE=1 SV=1	Allene oxide synthase, chloroplastic OS=Dorcoceras hygrometricum OX=472368 GN=F511_07040 PE=4 SV=1	Secondary metabolites biosynthesis, transport and catabolism	allene oxide synthase, chloroplastic [Dorcoceras hygrometricum]	molecular function: catalytic activity (GO:0003824);; biological process: metabolic process (GO:0008152);; biological process: single-organism process (GO:0044699);; molecular function: binding (GO:0005488)	alpha-Linolenic acid metabolism (ko00592)	--
c39238.graph_c0	0	0	0	0	0	0	0	0	0	0	0	0	0	0	0	0	0	0	0	0	0	0	0	0	0	0	0	0	--	--	--	--	--	--	--	--	--	--	--	--
c30163.graph_c0	1.58	0	0	0.53	0	4.42	2.91	2.44	0	0	1.4	0.47	0	0	1.31	0.44	0	0	0	0	0	0	0	0	0	1.66	2.87	1.51	--	--	--	--	--	--	Uncharacterized protein OS=Salvia splendens OX=180675 GN=Saspl_011405 PE=4 SV=1	--	hypothetical protein Saspl_011405 [Salvia splendens]	--	--	--
c98588.graph_c0	0	0	0	0	0	0	0	0	0	0	0	0	0	0	0	0	0	0	0	0	0	0	0	0	0	0	0	0	--	--	--	--	--	--	--	--	--	--	--	--
c103511.graph_c0	0	0	0	0	0	0.69	0	0.23	0	0	0	0	0	0	0	0	0.31	0.34	0	0.22	0	0	0.09	0.27	0	0.13	0	0.04	--	--	--	Chromatin structure and dynamics	Williams-Beuren syndrome DDT (WSD), D-TOX E motif	--	--	--	bromodomain adjacent to zinc finger domain protein 1A-like [Rhodamnia argentea]	--	--	--
c68328.graph_c0	6.18	6.73	8.12	7.01	7.22	7.31	5.54	6.69	5.14	5.99	6.01	5.71	7.09	4.94	8	6.68	7.9	8.73	7.44	8.02	7.05	7.02	7.56	8.62	6.73	8.69	8.14	7.85	--	--	--	--	--	--	Uncharacterized protein OS=Salvia splendens OX=180675 GN=Saspl_009861 PE=4 SV=1	--	hypothetical protein Saspl_009861 [Salvia splendens]	--	--	--
c57557.graph_c0	0	0	0	0	0	0.51	0	0.17	0.38	0.75	0	0.38	0	0	0	0	0.31	0	0.34	0.22	0	0	0	0	0	0	0	0	--	--	--	--	--	--	--	--	--	--	--	--
c84833.graph_c0	0.73	0.56	0.49	0.59	0.66	0.68	0.75	0.7	0.61	0.37	0.46	0.48	0.58	0.52	0.67	0.59	1.12	0.83	0.83	0.93	0.89	0.9	0.85	0.77	1.34	1.48	0.5	1.11	--	--	--	--	Myb/SANT-like DNA-binding domain	--	Myb_DNA-bind_3 domain-containing protein OS=Salvia splendens OX=180675 GN=Saspl_022552 PE=4 SV=1	--	hypothetical protein Saspl_022552 [Salvia splendens]	--	--	--
c93210.graph_c0	0	0	0	0	0	0	0	0	0	0	0	0	0	1.17	0	0.39	0	0.33	0	0.11	0	0.36	0.12	0	0	0	0	0	--	--	--	--	Protein RETICULATA-related	Protein RETICULATA-RELATED 4, chloroplastic OS=Arabidopsis thaliana OX=3702 GN=RER4 PE=2 SV=1	Uncharacterized protein OS=Salvia splendens OX=180675 GN=Saspl_013134 PE=3 SV=1	Function unknown	hypothetical protein Saspl_013134 [Salvia splendens]	--	--	--
c46180.graph_c0	0	1.17	0	0.39	0	0	0	0	0.38	0	1.28	0.55	0	0	0	0	0	0	0	0	0.86	0	0.29	0	0.4	0	0	0.13	--	--	--	--	--	--	--	--	--	--	--	--
c95008.graph_c0	0	0	0	0	0	0	0	0	0	1.09	0	0.36	0	0	0	0	0	0	0	0	0	1.17	0.39	0	0	0	0	0	--	Molecular Function: antiporter activity (GO:0015297);; Cellular Component: integral component of membrane (GO:0016021);; Molecular Function: xenobiotic transmembrane transporter activity (GO:0042910);;	K03327|2.1e-25|sind:105155766|K03327 multidrug resistance protein, MATE family | (RefSeq) protein DETOXIFICATION 21-like isoform X1	General function prediction only	--	Protein DETOXIFICATION 21 OS=Arabidopsis thaliana OX=3702 GN=DTX21 PE=1 SV=1	Protein DETOXIFICATION OS=Salvia splendens OX=180675 GN=TC.MATE PE=3 SV=1	Defense mechanisms	multidrug resistance protein, MATE family [Salvia splendens]	molecular function: transporter activity (GO:0005215);; biological process: localization (GO:0051179);; cellular component: membrane (GO:0016020);; cellular component: membrane part (GO:0044425);; biological process: single-organism process (GO:0044699)	--	--
c35229.graph_c0	0	0.52	0	0.17	0	0.67	0.78	0.48	0	0	0	0	0	0	0	0	0.76	0	0.43	0.4	0	0	0.53	1.58	0	0	0	0	--	--	--	--	--	--	--	--	--	--	--	--
c33720.graph_c0	0	0	0	0	0	1.02	0	0.34	0	0	0	0	0	0	0.76	0.25	0.31	0.36	0	0.22	0.42	0	0.28	0.42	0	0	0	0	--	--	--	--	--	--	--	--	--	--	--	--
c100771.graph_c0	0	0	0.64	0.21	0	0	0	0	0	0	1.25	0.42	0	0	1.7	0.57	0	0	0	0	0	0	0	0	0	0	0	0	--	--	--	--	--	--	--	--	--	--	--	--
c14463.graph_c1	0.18	0	0	0.06	0	0	0	0	0	0	0	0	0.16	0	0	0.05	0	1.16	0	0.39	0	0	0	0	0.47	0	0.16	0.21	Energy production and conversion	Biological Process: ATP synthesis coupled proton transport (GO:0015986);; Cellular Component: proton-transporting ATP synthase complex, catalytic core F(1) (GO:0045261);; Molecular Function: proton-transporting ATP synthase activity, rotational mechanism (GO:0046933);;	K02136|2.9e-85|sot:102577433|K02136 F-type H+-transporting ATPase subunit gamma | (RefSeq) ATP synthase subunit gamma, mitochondrial	Energy production and conversion	ATP synthase	ATP synthase subunit gamma, mitochondrial OS=Ipomoea batatas OX=4120 GN=ATPC PE=1 SV=2	ATP synthase subunit gamma OS=Actinidia chinensis var. chinensis OX=1590841 GN=CEY00_Acc18336 PE=3 SV=1	Energy production and conversion	ATP synthase subunit gamma, mitochondrial [Camellia sinensis]	biological process: metabolic process (GO:0008152);; biological process: cellular process (GO:0009987);; biological process: single-organism process (GO:0044699);; biological process: localization (GO:0051179);; cellular component: cell (GO:0005623);; cellular component: membrane (GO:0016020);; cellular component: macromolecular complex (GO:0032991);; cellular component: membrane part (GO:0044425…	Oxidative phosphorylation (ko00190)	LOC114262903
c107713.graph_c0	0	0	0	0	0	0	0	0	0	0	0	0	0	0	0	0	0	0	0	0	0	0	0	0	0	0	0	0	--	--	--	--	--	--	--	--	--	--	--	--
c100664.graph_c0	0.55	0	0	0.18	0	0	0	0	1.4	0	0	0.47	0	0	0	0	0	0	0	0	0	0	0	0	0	0	1.01	0.34	--	--	--	--	--	--	--	--	--	--	--	--
c14256.graph_c0	0	0	0	0	1.11	0	0	0.37	0	0	0	0	0	0	0	0	0	0	0	0	0	0	0	0	0	1.24	0	0.41	--	--	--	--	--	--	--	--	--	--	--	--
c81595.graph_c1	2.36	0.94	8.29	3.86	1.83	1.97	4.51	2.77	1.55	1.63	2	1.73	2.44	1.6	4.48	2.84	1.42	2.09	9.36	4.29	9.1	10.25	7.89	4.33	5.79	0.35	1.15	2.43	--	--	--	--	C1 domain	--	Uncharacterized protein OS=Salvia splendens OX=180675 GN=Saspl_027092 PE=4 SV=1	Function unknown	hypothetical protein Saspl_027092 [Salvia splendens]	--	--	--
c6.graph_c0	0	0	0	0	0	0	0	0	0	0	0	0	0	0	0	0	0	0	0	0	0	0	0	0	0	0	0	0	--	Molecular Function: GTPase activity (GO:0003924);; Molecular Function: GTP binding (GO:0005525);;	K07874|3.2e-44|nau:109225754|K07874 Ras-related protein Rab-1A | (RefSeq) ras-related protein RABD2a-like	--	Ras family;; Ras of Complex, Roc, domain of DAPkinase	Ras-related protein RABD2a OS=Arabidopsis thaliana OX=3702 GN=RABD2A PE=1 SV=3	Uncharacterized protein OS=Camellia sinensis var. sinensis OX=542762 GN=TEA_005097 PE=4 SV=1	Intracellular trafficking, secretion, and vesicular transport	hypothetical protein HYC85_000990 [Camellia sinensis]	molecular function: catalytic activity (GO:0003824);; molecular function: binding (GO:0005488)	--	--
c84014.graph_c0	16.69	16.43	13.57	15.56	12.66	12.07	13.91	12.88	17.91	15.34	14.6	15.95	18.85	18.92	18.25	18.67	17.46	16.97	10.63	15.02	13.16	16.45	15.02	15.46	16.5	19	18.68	18.06	--	Molecular Function: endonuclease activity (GO:0004519);; Biological Process: rRNA processing (GO:0006364);; Cellular Component: Las1 complex (GO:0090730);;	K16912|2.4e-199|sind:105164994|K16912 ribosomal biogenesis protein LAS1 | (RefSeq) uncharacterized protein LOC105164994	General function prediction only	Las1-like	--	Uncharacterized protein OS=Salvia splendens OX=180675 GN=Saspl_006471 PE=4 SV=1	Replication, recombination and repair	hypothetical protein Saspl_006471 [Salvia splendens]	molecular function: catalytic activity (GO:0003824);; biological process: metabolic process (GO:0008152);; biological process: cellular process (GO:0009987);; biological process: cellular component organization or biogenesis (GO:0071840);; cellular component: cell (GO:0005623);; cellular component: macromolecular complex (GO:0032991);; cellular component: cell part (GO:0044464)	--	--
c105581.graph_c0	0	0	0	0	0	0	0	0	0	0	0	0	0	0	0	0	0	1.43	0	0.48	0	0	0	0	0	0	0	0	Inorganic ion transport and metabolism	Cellular Component: vacuolar membrane (GO:0005774);; Molecular Function: calcium:proton antiporter activity (GO:0015369);; Cellular Component: integral component of membrane (GO:0016021);;	K07300|3.4e-47|vvi:100243275|K07300 Ca2+:H+ antiporter | (RefSeq) vacuolar cation/proton exchanger 3	Inorganic ion transport and metabolism	Sodium/calcium exchanger protein	Vacuolar cation/proton exchanger 3 OS=Arabidopsis thaliana OX=3702 GN=CAX3 PE=1 SV=1	Vacuolar cation/proton exchanger OS=Davidia involucrata OX=16924 GN=Din_030460 PE=3 SV=1	Inorganic ion transport and metabolism	hypothetical protein HYC85_012661 [Camellia sinensis]	cellular component: cell (GO:0005623);; cellular component: membrane (GO:0016020);; cellular component: organelle (GO:0043226);; cellular component: organelle part (GO:0044422);; cellular component: cell part (GO:0044464);; molecular function: transporter activity (GO:0005215);; biological process: single-organism process (GO:0044699);; biological process: localization (GO:0051179);; cellular com…	--	--
c100586.graph_c0	0	0	0	0	0	0	0	0	0	0	0	0	0	0	0	0	0	0	0	0	0	0	0	0	0	0	0	0	--	Cellular Component: integral component of membrane (GO:0016021);;	--	--	--	--	ANK_REP_REGION domain-containing protein OS=Salvia splendens OX=180675 GN=Saspl_005956 PE=4 SV=1	--	hypothetical protein Saspl_005956 [Salvia splendens]	cellular component: membrane (GO:0016020);; cellular component: membrane part (GO:0044425)	--	--
c695.graph_c1	0	0	0	0	0	0	0	0	0	0	0	0	0	0	0	0	0	0	0	0	0	1.78	0.59	0	0	0	0	0	--	--	--	--	--	--	--	--	--	--	--	--
c109475.graph_c0	0	0	0	0	0	0	0	0	0	0	0	0	0	4.99	0	1.66	0	0	0	0	0	0	0	0	0	0	0	0	--	--	--	--	--	--	--	--	--	--	--	--
c88355.graph_c0	0	0	0	0	0	0	0	0	0	0	0	0	0	0	0	0	0	0	0	0	0	0	0	0	0	0	0	0	--	--	--	--	--	--	--	--	--	--	--	--
c58539.graph_c0	1	0.23	0.24	0.49	0.68	0.26	1.4	0.78	0	0	0	0	0.22	0	0	0.07	0.36	0	0	0.12	0	0.44	0.23	0.24	0	0.97	0.46	0.48	--	Cellular Component: ubiquitin ligase complex (GO:0000151);; Biological Process: response to acid chemical (GO:0001101);; Molecular Function: protein binding (GO:0005515);; Cellular Component: cellular_component (GO:0005575);; Cellular Component: intracellular (GO:0005622);; Cellular Component: obsolete cell (GO:0005623);; Biological Process: proteolysis (GO:0006508);; Biological Process: ubiquiti…	K14495|5.2e-21|smo:SELMODRAFT_423923|K14495 F-box protein GID2 | (RefSeq) GID2a-1; hypothetical protein	--	F-box-like;; F-box domain	F-box protein SNE OS=Arabidopsis thaliana OX=3702 GN=SNE PE=1 SV=1	F-box domain-containing protein OS=Handroanthus impetiginosus OX=429701 GN=CDL12_24009 PE=4 SV=1	Function unknown	hypothetical protein CDL12_24009 [Handroanthus impetiginosus]	cellular component: cell (GO:0005623);; cellular component: macromolecular complex (GO:0032991);; cellular component: cell part (GO:0044464);; biological process: response to stimulus (GO:0050896);; molecular function: binding (GO:0005488);; biological process: metabolic process (GO:0008152);; biological process: cellular process (GO:0009987);; biological process: signaling (GO:0023052);; biologi…	Plant hormone signal transduction (ko04075)	--
c96553.graph_c0	0	0	0	0	0	0	0	0	0.23	0	0	0.08	0	0.26	0	0.09	0	0	0	0	0	0	0.18	0.53	0	0.8	0	0.27	--	--	--	--	--	--	--	--	--	--	--	--
c115150.graph_c0	0	0	0	0	0	0	0	0	0	0	0	0	0	0	0	0	0	0	0	0	0	0	0	0	0	0	0	0	--	--	--	--	--	--	--	--	--	--	--	--
c101729.graph_c0	0	0	0	0	0	0	0	0	0	0	0	0	0	0	0	0	0	0	0	0	0	0	0	0	0	0	2.24	0.75	--	Cellular Component: cellular_component (GO:0005575);; Cellular Component: intracellular (GO:0005622);; Cellular Component: obsolete cell (GO:0005623);; Cellular Component: cytoplasm (GO:0005737);; Cellular Component: mitochondrion (GO:0005739);; Biological Process: biological_process (GO:0008150);; Biological Process: regulation of metabolic process (GO:0019222);; Biological Process: regulation o…	--	--	--	--	Uncharacterized protein OS=Triticum urartu OX=4572 PE=4 SV=1	Function unknown	Tar1p [Candida albicans SC5314]	cellular component: cell (GO:0005623);; cellular component: cell part (GO:0044464);; cellular component: organelle (GO:0043226);; biological process: biological regulation (GO:0065007)	--	TAR1
c49480.graph_c1	0	0	0	0	0	0	0	0	0	0	0	0	0	0	0	0	0	0	0	0	0	0	0	0	0	0	0	0	--	--	--	--	--	--	--	--	--	--	--	--
c55811.graph_c0	0.98	0.42	0.69	0.7	0.81	1	0.61	0.81	1.11	0.44	0.76	0.77	0.65	0.58	0.68	0.64	0.15	0.3	0.36	0.27	0.75	0.34	0.57	0.63	0.45	0.93	0.87	0.75	--	Biological Process: sucrose metabolic process (GO:0005985);; Molecular Function: sucrose synthase activity (GO:0016157);; Molecular Function: sucrose-phosphate synthase activity (GO:0046524);;	K00696|2.9e-214|sind:105162148|K00696 sucrose-phosphate synthase [EC:2.4.1.14] | (RefSeq) probable sucrose-phosphate synthase 1	Cell wall/membrane/envelope biogenesis	Glycosyl transferases group 1;; Glycosyl transferases group 1;; Sucrose-6F-phosphate phosphohydrolase	Probable sucrose-phosphate synthase 1 OS=Craterostigma plantagineum OX=4153 GN=SPS1 PE=2 SV=1	Sucrose-phosphate synthase OS=Salvia splendens OX=180675 GN=Saspl_034889 PE=3 SV=1	Cell wall/membrane/envelope biogenesis	probable sucrose-phosphate synthase 1 [Sesamum indicum]	biological process: metabolic process (GO:0008152);; biological process: cellular process (GO:0009987);; biological process: single-organism process (GO:0044699);; molecular function: catalytic activity (GO:0003824)	Starch and sucrose metabolism (ko00500)	--
c60577.graph_c1	3.78	0	2.14	1.97	0	0	0.7	0.23	0	0	0	0	0	0	0	0	0	1.81	0	0.6	0	1.35	0.45	0	3.37	0	0	1.12	--	Cellular Component: integral component of membrane (GO:0016021);; Molecular Function: transferase activity, transferring alkyl or aryl (other than methyl) groups (GO:0016765);; Biological Process: dolichol biosynthetic process (GO:0019408);; Cellular Component: dehydrodolichyl diphosphate synthase complex (GO:1904423);;	K11778|3.3e-12|sind:105169621|K11778 ditrans,polycis-polyprenyl diphosphate synthase [EC:2.5.1.87] | (RefSeq) dehydrodolichyl diphosphate synthase complex subunit nus1-like	--	--	--	Ditrans,polycis-polyprenyl diphosphate synthase ((2E,6E)-farnesyldiphosphate specific) OS=Salvia splendens OX=180675 GN=DHDDS PE=3 SV=1	Lipid transport and metabolism	ditrans,polycis-polyprenyl diphosphate synthase [Salvia splendens]	cellular component: membrane (GO:0016020);; cellular component: membrane part (GO:0044425);; molecular function: catalytic activity (GO:0003824);; biological process: metabolic process (GO:0008152);; biological process: cellular process (GO:0009987);; biological process: single-organism process (GO:0044699);; cellular component: macromolecular complex (GO:0032991)	Terpenoid backbone biosynthesis (ko00900)	--
c94231.graph_c0	0	0	2.46	0.82	0	0	0	0	0	0	0	0	0	0	0	0	0	0	2.6	0.87	0	0	0	0	0	0	0	0	--	--	--	--	--	--	--	--	--	--	--	--
c82851.graph_c0	0	0	0	0	0	0	0	0	0	0	0	0	0	0	0	0	0	0	0	0	0	0	0.43	1.28	0	0	2.5	0.83	--	--	--	--	--	--	--	--	--	--	--	--
c113129.graph_c0	0	0	0	0	0	0	0	0	0	0	0	0	0	0	0	0	0	2.4	0	0.8	0	0	0	0	0	0	0	0	--	--	--	--	--	--	--	--	general transcription factor IIE subunit 2-like [Rhodamnia argentea]	--	--	LOC115740356
c24696.graph_c0	0	0	0	0	0	0	0	0	0	0	0	0	0	0	0	0	0	0	1.52	0.51	0	0	0	0	0	0	0	0	--	Molecular Function: fatty-acyl-CoA binding (GO:0000062);; Molecular Function: isomerase activity (GO:0016853);;	--	--	--	--	Enoyl-CoA hydratase/isomerase family, putative OS=Phytophthora infestans (strain T30-4) OX=403677 GN=PITG_04934 PE=4 SV=1	--	enoyl-CoA delta isomerase 2, mitochondrial-like [Rhodamnia argentea]	molecular function: binding (GO:0005488);; molecular function: catalytic activity (GO:0003824)	--	LOC115738519
c113060.graph_c0	5.06	0	0	1.69	0	0	0	0	0	0	0	0	0	0	0	0	0	0	0	0	0	0	0	0	0	0	0	0	--	--	--	--	--	--	--	--	--	--	--	--
c66526.graph_c0	3.01	3.7	0.78	2.5	1.18	1.48	2.08	1.58	1.86	2.88	6.61	3.78	3.02	4.82	4.95	4.26	2.26	2.09	0.88	1.74	1.62	1.22	2.71	5.28	4.18	2.27	4.48	3.64	--	--	--	--	--	--	--	--	--	--	--	--
c62729.graph_c0	0.33	0	0.73	0.35	0.69	0	0.14	0.28	0.66	0	0.15	0.27	0	0.14	0.4	0.18	0.56	0.25	0.13	0.31	0	0.54	0.38	0.6	0.42	0.3	0	0.24	--	--	--	--	--	--	--	--	--	--	--	--
c73941.graph_c0	0.84	0.9	0.48	0.74	1.62	1.48	1.36	1.49	1.35	1.1	0.52	0.99	0.66	0.58	1.06	0.77	1.02	0.79	2.03	1.28	1.02	0.77	0.98	1.14	0.77	0.93	1.19	0.96	--	Molecular Function: nucleic acid binding (GO:0003676);; Molecular Function: aspartic-type endopeptidase activity (GO:0004190);; Biological Process: DNA integration (GO:0015074);;	K12349|2.9e-98|ccaj:109806181|K12349 neutral ceramidase [EC:3.5.1.23] | (RefSeq) neutral ceramidase-like	General function prediction only	Integrase zinc binding domain;; Chromo (CHRromatin Organisation MOdifier) domain	--	Transposon Tf2-1 polyprotein (Fragment) OS=Trifolium medium OX=97028 GN=A2U01_0000436 PE=4 SV=1	Lipid transport and metabolism	uncharacterized protein LOC110673970 isoform X1 [Hevea brasiliensis]	molecular function: binding (GO:0005488);; molecular function: catalytic activity (GO:0003824);; biological process: metabolic process (GO:0008152);; biological process: cellular process (GO:0009987)	Sphingolipid metabolism (ko00600)	--
c106051.graph_c0	0	0	0	0	0	0	0	0	0	0	0	0	3.48	0	0	1.16	0	0	0	0	0	0	0	0	0	0	0	0	--	--	--	--	--	--	--	--	--	--	--	--
c86685.graph_c0	2.82	3.35	2.98	3.05	1.98	0.78	3.52	2.09	3.63	3.05	3.64	3.44	4.4	2.72	4.64	3.92	1.73	2.58	1.37	1.89	1.2	1.24	1.57	2.28	1.51	1.51	2.89	1.97	--	--	--	--	--	--	Uncharacterized protein OS=Handroanthus impetiginosus OX=429701 GN=CDL12_23650 PE=4 SV=1	--	hypothetical protein CDL12_23650 [Handroanthus impetiginosus]	--	--	--
c48077.graph_c0	0	7.81	0	2.6	0	0	1.88	0.63	0	1.64	1.79	1.14	3.46	0	0	1.15	2.5	3.25	5.94	3.9	1.86	0	1.86	3.73	0	0	0	0	--	--	--	--	--	--	--	--	--	--	--	--
c91262.graph_c0	0	1.27	0	0.42	0.93	0	0	0.31	0	0.29	0	0.1	0	0	0	0	0	0	0	0	0	0	0.33	0.98	0	0.34	0.31	0.22	--	Molecular Function: RNA-directed DNA polymerase activity (GO:0003964);;	K07195|6.0e-15|qsu:112020577|K07195 exocyst complex component 7 | (RefSeq) exocyst complex component EXO70A1-like	General function prediction only	Integrase zinc binding domain	--	Reverse transcriptase domain-containing protein OS=Tanacetum cinerariifolium OX=118510 GN=Tci_324385 PE=4 SV=1	Amino acid transport and metabolism	uncharacterized protein LOC113728694 [Coffea arabica]	molecular function: catalytic activity (GO:0003824);; biological process: metabolic process (GO:0008152);; biological process: cellular process (GO:0009987)	--	LOC113728694
c13844.graph_c0	0	0	0	0	0	0	0	0	0	0	0	0	0	0	0	0	0	0	0	0	0	0	0	0	0	0	0	0	--	--	--	--	--	--	--	--	--	--	--	--
c35940.graph_c0	0	0	0.64	0.21	0	0.34	0.47	0.27	0.14	0	0.49	0.21	0	0.46	0.15	0.2	0	0.28	0.4	0.23	0.16	0	0.05	0	0	0.32	0	0.11	--	--	--	--	--	--	--	--	--	--	--	--
c76952.graph_c1	20.6	21.55	17.67	19.94	19.19	22.12	19.59	20.3	18.53	19.76	13.29	17.19	19.92	20.9	15.65	18.82	23.22	21.16	24.85	23.08	17.02	22.78	21.78	25.53	21.34	22.7	24.8	22.95	--	Molecular Function: calcium ion binding (GO:0005509);; Cellular Component: integral component of membrane (GO:0016021);;	K06268|3.5e-87|cann:107873545|K06268 serine/threonine-protein phosphatase 2B regulatory subunit | (RefSeq) calcineurin B-like protein 10	Signal transduction mechanisms	EF hand;; EF hand	Calcineurin B-like protein 10 OS=Arabidopsis thaliana OX=3702 GN=CBL10 PE=1 SV=1	Uncharacterized protein OS=Salvia splendens OX=180675 GN=Saspl_009031 PE=4 SV=1	Signal transduction mechanisms	hypothetical protein Saspl_009031 [Salvia splendens]	molecular function: binding (GO:0005488);; cellular component: membrane (GO:0016020);; cellular component: membrane part (GO:0044425)	--	--
c35132.graph_c0	0	0	0	0	0	0	0	0	0	0	0	0	0	0.38	0	0.13	0	0.32	0	0.11	0	0.7	0.36	0.37	0	0	0	0	--	--	--	--	--	--	--	--	--	--	--	--
c58972.graph_c0	3.64	4.15	5.72	4.5	2.94	3.22	6.79	4.32	4.42	5.08	6.48	5.33	6.14	2.34	3.11	3.86	4.51	2.29	5.31	4.04	1.54	3.95	2.73	2.69	2.86	1.99	3.34	2.73	--	Cellular Component: integral component of membrane (GO:0016021);;	--	--	--	--	Uncharacterized protein OS=Salvia splendens OX=180675 GN=Saspl_028449 PE=4 SV=1	--	hypothetical protein Saspl_028449 [Salvia splendens]	cellular component: membrane (GO:0016020);; cellular component: membrane part (GO:0044425)	--	--
c43147.graph_c0	0.98	0.26	0.91	0.72	0.87	0.68	1.52	1.02	1.59	0.12	0.93	0.88	1.37	0	1.32	0.9	1.22	0.79	0.65	0.89	1.71	1.82	1.5	0.96	1.44	1.86	1.65	1.65	--	Molecular Function: RNA-directed DNA polymerase activity (GO:0003964);;	--	--	--	--	Putative non-LTR retroelement reverse transcriptase related protein (Fragment) OS=Trifolium medium OX=97028 PE=4 SV=1	--	uncharacterized protein LOC112420072 [Medicago truncatula]	molecular function: catalytic activity (GO:0003824);; biological process: metabolic process (GO:0008152);; biological process: cellular process (GO:0009987)	--	LOC112420072
c48874.graph_c1	0	0	0	0	0	0	0	0	0.97	0	0	0.32	0.26	1.36	0.75	0.79	0	0	0	0	0	0	0	0	0	0	0.27	0.09	--	Molecular Function: GTPase activity (GO:0003924);; Molecular Function: structural constituent of cytoskeleton (GO:0005200);; Molecular Function: GTP binding (GO:0005525);; Cellular Component: cytoplasm (GO:0005737);; Cellular Component: microtubule (GO:0005874);; Biological Process: microtubule-based process (GO:0007017);;	K07375|1.4e-81|ppp:112278684|K07375 tubulin beta | (RefSeq) tubulin beta chain-like	Cytoskeleton	Tubulin/FtsZ family, GTPase domain	Tubulin beta chain OS=Phytophthora cinnamomi OX=4785 PE=3 SV=1	Tubulin beta chain OS=Dendrobium officinale OX=142615 GN=TUB PE=2 SV=1	Cytoskeleton	beta-1 tubulin [Dendrobium catenatum]	molecular function: catalytic activity (GO:0003824);; molecular function: structural molecule activity (GO:0005198);; biological process: cellular process (GO:0009987);; biological process: cellular component organization or biogenesis (GO:0071840);; molecular function: binding (GO:0005488);; cellular component: cell (GO:0005623);; cellular component: cell part (GO:0044464);; cellular component: …	Phagosome (ko04145)	--
c78548.graph_c0	15.27	15.31	14.44	15.01	12.02	12.69	8.07	10.93	14.28	12.77	9.12	12.06	14.86	11.35	10.03	12.08	14.68	10.48	18.21	14.46	10.17	11.45	11.48	12.81	15.33	11.18	8.51	11.67	--	Molecular Function: DNA binding (GO:0003677);; Cellular Component: nucleus (GO:0005634);; Biological Process: regulation of transcription, DNA-templated (GO:0006355);; Biological Process: auxin-activated signaling pathway (GO:0009734);;	K14486|1.5e-58|cic:CICLE_v10007286mg|K14486 auxin response factor | (RefSeq) hypothetical protein	--	B3 DNA binding domain	Auxin response factor 18 OS=Oryza sativa subsp. japonica OX=39947 GN=ARF18 PE=2 SV=1	Auxin response factor OS=Handroanthus impetiginosus OX=429701 GN=CDL12_25466 PE=3 SV=1	Transcription	auxin response factor 18 [Sesamum indicum]	molecular function: binding (GO:0005488);; cellular component: cell (GO:0005623);; cellular component: organelle (GO:0043226);; cellular component: cell part (GO:0044464);; biological process: biological regulation (GO:0065007);; biological process: cellular process (GO:0009987);; biological process: signaling (GO:0023052);; biological process: single-organism process (GO:0044699);; biological pr…	Plant hormone signal transduction (ko04075)	LOC105174298
c101309.graph_c0	0	0	0	0	0	0	0	0	0	0	0	0	0	0	0	0	0	0	0	0	0	0.56	0.19	0	1.66	0	0	0.55	--	Cellular Component: integral component of membrane (GO:0016021);;	--	--	Malectin-like domain	Probable receptor-like protein kinase At5g59700 OS=Arabidopsis thaliana OX=3702 GN=At5g59700 PE=1 SV=1	Malectin_like domain-containing protein OS=Erythranthe guttata OX=4155 GN=MIMGU_mgv1a005643mg PE=4 SV=1	Function unknown	PREDICTED: probable receptor-like protein kinase At5g24010 [Erythranthe guttata]	cellular component: membrane (GO:0016020);; cellular component: membrane part (GO:0044425)	--	LOC105964001
c83914.graph_c0	27.31	36.46	22.94	28.9	27.94	26.57	27.33	27.28	27.01	25.42	32.59	28.34	23.94	28.94	23.27	25.38	17.08	23.4	15.9	18.79	21.45	20.61	21.64	22.86	22.79	20.63	24.53	22.65	Signal transduction mechanisms	Molecular Function: voltage-gated potassium channel activity (GO:0005249);; Cellular Component: integral component of membrane (GO:0016021);; Biological Process: regulation of ion transmembrane transport (GO:0034765);;	K21867|0.0e+00|sind:105167760|K21867 potassium channel | (RefSeq) potassium channel SKOR-like	--	Ion transport protein;; Ankyrin repeats (many copies);; Ankyrin repeats (3 copies);; KHA, dimerisation domain of potassium ion channel;; Ankyrin repeats (many copies);; Ankyrin repeat;; Cyclic nucleotide-binding domain;; Ankyrin repeat;; Ion channel	Potassium channel SKOR OS=Arabidopsis thaliana OX=3702 GN=SKOR PE=1 SV=1	Uncharacterized protein OS=Salvia splendens OX=180675 GN=Saspl_040536 PE=3 SV=1	--	hypothetical protein Saspl_040536 [Salvia splendens]	molecular function: transporter activity (GO:0005215);; biological process: cellular process (GO:0009987);; biological process: single-organism process (GO:0044699);; biological process: localization (GO:0051179);; biological process: biological regulation (GO:0065007);; cellular component: membrane (GO:0016020);; cellular component: membrane part (GO:0044425)	--	--
c55422.graph_c0	1.55	0	0	0.52	0.71	0	2.87	1.19	0.66	0.64	1.42	0.91	1.36	0	0	0.45	0	0.62	0	0.21	2.18	0.69	1.2	0.72	0	1.56	0	0.52	--	Molecular Function: protein serine/threonine kinase activity (GO:0004674);; Molecular Function: ATP binding (GO:0005524);; Cellular Component: integral component of membrane (GO:0016021);;	--	--	Leucine Rich repeats (2 copies);; Leucine Rich repeat;; Leucine Rich Repeat;; Leucine rich repeat	--	Protein brassinosteroid insensitive 1 OS=Salvia splendens OX=180675 GN=BRI1 PE=3 SV=1	Signal transduction mechanisms	protein brassinosteroid insensitive 1 [Salvia splendens]	molecular function: catalytic activity (GO:0003824);; biological process: metabolic process (GO:0008152);; biological process: cellular process (GO:0009987);; molecular function: binding (GO:0005488);; cellular component: membrane (GO:0016020);; cellular component: membrane part (GO:0044425)	--	--
c96930.graph_c0	0	0	0	0	0	0	0	0	0	0	0	0	0	0	0	0	0	0	0	0	0	0	0	0	4.21	0	0	1.4	--	Molecular Function: RNA binding (GO:0003723);; Molecular Function: metalloendopeptidase activity (GO:0004222);; Molecular Function: ATP binding (GO:0005524);; Molecular Function: zinc ion binding (GO:0008270);; Cellular Component: integral component of membrane (GO:0016021);;	K15032|4.8e-09|ccav:112513541|K15032 mTERF domain-containing protein, mitochondrial | (RefSeq) uncharacterized protein LOC112513541	General function prediction only	RNA recognition motif. (a.k.a. RRM, RBD, or RNP domain)	--	Uncharacterized protein OS=Camellia sinensis var. sinensis OX=542762 GN=TEA_028955 PE=4 SV=1	RNA processing and modification	29 kDa ribonucleoprotein B, chloroplastic [Camellia sinensis]	molecular function: binding (GO:0005488);; molecular function: catalytic activity (GO:0003824);; biological process: metabolic process (GO:0008152);; cellular component: membrane (GO:0016020);; cellular component: membrane part (GO:0044425)	--	LOC114293062
c548.graph_c1	0	0	0	0	0.43	0	0.29	0.24	0	0	0.15	0.05	0	0.14	0	0.05	0	0	0	0	0	0	0	0	0.27	0.15	0.14	0.19	--	--	--	--	--	--	--	--	--	--	--	--
c115093.graph_c0	0	0	0	0	0	0	0	0	0	0	0	0	0	0	0	0	0	0	0	0	0	0	0	0	0	0	0	0	--	--	--	--	--	--	--	--	--	--	--	--
c114722.graph_c0	0	0	0	0	0	0	0	0	2.36	0	0	0.79	0	0	0	0	0	0	0	0	0	0	0	0	0	0	0	0	--	--	--	--	--	--	--	--	--	--	--	--
c94168.graph_c0	0	0	0	0	0	0	0	0	0	0	1.73	0.58	0	0	0	0	0	0	0	0	0	0	0	0	0	0	0	0	--	--	--	--	--	--	--	--	--	--	--	--
c32900.graph_c0	0	0	0	0	0	0	0	0	0	0	0	0	0	0	0	0	0	0	0	0	0	0.87	0.29	0	0	0	0	0	--	--	--	--	--	--	--	--	--	--	--	--
c40293.graph_c2	0	0	0	0	0.36	0	0.92	0.43	0	0	0.19	0.06	0	0.36	0	0.12	0.14	0.32	0.31	0.26	0	0	0.13	0.38	0	0	0	0	--	--	--	--	--	--	--	--	--	--	--	--
c14388.graph_c0	0	0	0	0	0	0	0	0	0	0	0	0	0	0	0	0	0	0	0	0	0	0	0	0	0	0	0	0	--	--	--	--	--	--	--	--	--	--	--	--
c760.graph_c1	0	0	0	0	0	0	0	0	0	0	0	0	0	0	0	0	0	0	0	0	0	0	0	0	0	0	0	0	--	--	--	--	--	--	--	--	--	--	--	--
c85789.graph_c0	3.93	4.17	5.06	4.39	3.97	4.06	4.31	4.11	4.65	4.27	4.4	4.44	5.78	4.66	4.75	5.06	4.73	4.5	5.59	4.94	4.6	4.42	4.87	5.6	4.87	5.45	4.57	4.96	Defense mechanisms	Molecular Function: zinc ion binding (GO:0008270);;	K22733|2.7e-139|cit:102612526|K22733 magnesium transporter | (RefSeq) uncharacterized protein LOC102612526	General function prediction only	PPR repeat;; PPR repeat family;; PPR repeat;; DYW family of nucleic acid deaminases;; Pentatricopeptide repeat domain;; Pentacotripeptide-repeat region of PRORP;; Tetratricopeptide repeat;; Tetratricopeptide repeat;; HSF-type DNA-binding;; AhpC/TSA family	Pentatricopeptide repeat-containing protein At2g29760, chloroplastic OS=Arabidopsis thaliana OX=3702 GN=PCMP-H33 PE=2 SV=1	DYW_deaminase domain-containing protein OS=Salvia splendens OX=180675 GN=Saspl_046269 PE=3 SV=1	Function unknown	hypothetical protein Saspl_046269 [Salvia splendens]	molecular function: binding (GO:0005488)	--	--
c51191.graph_c0	6.1	9.12	8.62	7.95	9.44	9.65	7.93	9.01	4.65	4.56	11.86	7.02	8.61	7.37	10.8	8.93	10.27	4.9	11.11	8.76	6.33	8.69	6.72	5.15	7.6	10.95	7.79	8.78	--	--	--	--	--	--	--	--	--	--	--	--
c54224.graph_c2	0.56	0.46	0.87	0.63	0.83	0.75	0.58	0.72	0.53	0.58	0.73	0.61	0.29	0.71	0.87	0.62	0.48	0.53	1.55	0.85	0.84	0.69	0.84	0.98	0.74	0.51	0.84	0.7	Inorganic ion transport and metabolism	Molecular Function: calcium transmembrane transporter activity, phosphorylative mechanism (GO:0005388);; Molecular Function: ATP binding (GO:0005524);; Cellular Component: integral component of membrane (GO:0016021);;	K01537|0.0e+00|sind:105171288|K01537 P-type Ca2+ transporter type 2C [EC:7.2.2.10] | (RefSeq) putative calcium-transporting ATPase 13, plasma membrane-type	Inorganic ion transport and metabolism	E1-E2 ATPase;; haloacid dehalogenase-like hydrolase;; Cation transport ATPase (P-type);; Cation transporter/ATPase, N-terminus	Putative calcium-transporting ATPase 13, plasma membrane-type OS=Arabidopsis thaliana OX=3702 GN=ACA13 PE=3 SV=1	Calcium-transporting ATPase OS=Dorcoceras hygrometricum OX=472368 GN=F511_20017 PE=3 SV=1	Inorganic ion transport and metabolism	putative calcium-transporting ATPase 13, plasma membrane-type [Sesamum indicum]	molecular function: catalytic activity (GO:0003824);; molecular function: transporter activity (GO:0005215);; biological process: localization (GO:0051179);; molecular function: binding (GO:0005488);; cellular component: membrane (GO:0016020);; cellular component: membrane part (GO:0044425)	--	LOC105171288
c78743.graph_c0	13.1	10.81	15.33	13.08	13.55	12.13	15.22	13.63	13.86	10.82	13.66	12.78	13.73	13.36	12.05	13.05	13.86	16.59	15.79	15.41	15.81	16.23	16.66	17.93	16.71	17.02	17.43	17.05	--	Biological Process: mRNA processing (GO:0006397);;	K01537|2.1e-135|sita:101775448|K01537 P-type Ca2+ transporter type 2C [EC:7.2.2.10] | (RefSeq) calcium-transporting ATPase 5, plasma membrane-type	General function prediction only	Arsenite-resistance protein 2;; SERRATE/Ars2, N-terminal domain	Serrate RNA effector molecule OS=Arabidopsis thaliana OX=3702 GN=SE PE=1 SV=2	C2H2-type domain-containing protein OS=Salvia splendens OX=180675 GN=Saspl_014692 PE=4 SV=1	RNA processing and modification	hypothetical protein Saspl_014692 [Salvia splendens]	biological process: metabolic process (GO:0008152);; biological process: cellular process (GO:0009987)	--	--
c19432.graph_c0	0	0	0	0	0	0	0	0	0	0	0	0	0	0	0	0	0	0	0	0	0	0	0	0	0	0	0	0	--	--	--	--	--	--	--	--	integrator complex subunit 9 homolog [Rhodamnia argentea]	--	--	LOC115745143
c80805.graph_c1	64.87	69.41	66.4	66.89	71.1	78.01	61.82	70.31	70.59	68.78	63.44	67.6	66.62	47.63	63.83	59.36	53.88	53.65	60.45	55.99	68.27	60.05	60.66	53.65	60.58	53.13	55.38	56.36	Amino acid transport and metabolism	Biological Process: oligopeptide transport (GO:0006857);; Cellular Component: integral component of membrane (GO:0016021);; Molecular Function: transmembrane transporter activity (GO:0022857);;	K14638|3.0e-168|oeu:111372249|K14638 solute carrier family 15 (peptide/histidine transporter), member 3/4 | (RefSeq) protein NRT1/ PTR FAMILY 5.10-like	Amino acid transport and metabolism	POT family	Protein NRT1/ PTR FAMILY 5.14 OS=Arabidopsis thaliana OX=3702 GN=NPF5.14 PE=2 SV=2	Solute carrier family 15 (Peptide/histidine transporter), member 3/4 OS=Salvia splendens OX=180675 GN=SLC15A3_4 PE=3 SV=1	Amino acid transport and metabolism	solute carrier family 15 (peptide/histidine transporter), member 3/4 [Salvia splendens]	biological process: localization (GO:0051179);; cellular component: membrane (GO:0016020);; cellular component: membrane part (GO:0044425);; molecular function: transporter activity (GO:0005215)	--	--
c108912.graph_c0	0	0	0	0	0	0	0	0	0	0	0	0	0.34	0	0	0.11	0	0	0	0	0	0.34	0.11	0	0	0.75	0	0.25	--	--	--	--	--	--	--	--	--	--	--	--
c36589.graph_c0	0	0	0	0	0	0	0	0	0	0	0	0	0	0	0	0	0	0	0	0	0	0	0	0	0	0	0	0	--	Molecular Function: transferase activity, transferring acyl groups other than amino-acyl groups (GO:0016747);;	K13065|1.2e-07|oeu:111397779|K13065 shikimate O-hydroxycinnamoyltransferase [EC:2.3.1.133] | (RefSeq) pelargonidin 3-O-(6-caffeoylglucoside) 5-O-(6-O-malonylglucoside) 4'''-malonyltransferase-like	--	Transferase family	Pelargonidin 3-O-(6-caffeoylglucoside) 5-O-(6-O-malonylglucoside) 4'''-malonyltransferase OS=Salvia splendens OX=180675 PE=1 SV=1	Uncharacterized protein OS=Erythranthe guttata OX=4155 GN=MIMGU_mgv1a021026mg PE=3 SV=1	Function unknown	PREDICTED: pelargonidin 3-O-(6-caffeoylglucoside) 5-O-(6-O-malonylglucoside) 4'''-malonyltransferase-like [Erythranthe guttata]	molecular function: catalytic activity (GO:0003824)	Phenylpropanoid biosynthesis (ko00940);; Flavonoid biosynthesis (ko00941);; Stilbenoid, diarylheptanoid and gingerol biosynthesis (ko00945)	--
c61060.graph_c0	0	0.59	0	0.2	0	0	0	0	0	0	0	0	0	0	0	0	0.3	0	0	0.1	0	0	0	0	0	0	0.19	0.06	--	--	--	--	--	--	--	--	--	--	--	--
c69916.graph_c1	0	0	0	0	0.42	0.31	0.15	0.29	0.26	2.07	0.15	0.83	0	0.14	0.14	0.09	0.23	0	1.77	0.67	0.3	0	0.2	0.3	1.48	0.3	0.29	0.69	--	--	--	--	--	--	--	--	--	--	--	--
c99749.graph_c0	0	0	0	0	8	0	0	2.67	0	0	0	0	0	0	0	0	0	0	0	0	0	0	0	0	0	0	0	0	--	--	--	--	--	--	--	--	--	--	--	--
c106131.graph_c0	0	0	0	0	0	0	0	0	0	0	0	0	0	0	0	0	0	0	0	0	0	0	0.82	2.46	0	0	0	0	--	Cellular Component: integral component of membrane (GO:0016021);; Molecular Function: transferase activity, transferring acyl groups (GO:0016746);;	K13506|1.4e-20|gsl:Gasu_59870|K13506 glycerol-3-phosphate O-acyltransferase 3/4 [EC:2.3.1.15] | (RefSeq) phospholipid/glycerol acyltransferase family protein	Lipid transport and metabolism	Acyltransferase	Glycerol-3-phosphate acyltransferase 9 OS=Arabidopsis thaliana OX=3702 GN=GPAT9 PE=1 SV=1	Phospholipid/glycerol acyltransferase family protein OS=Galdieria sulphuraria OX=130081 GN=Gasu_59870 PE=4 SV=1	Lipid transport and metabolism	glycerol-3-phosphate acyltransferase 3-like [Rhodamnia argentea]	cellular component: membrane (GO:0016020);; cellular component: membrane part (GO:0044425);; molecular function: catalytic activity (GO:0003824)	Glycerolipid metabolism (ko00561);; Glycerophospholipid metabolism (ko00564)	--
c105617.graph_c0	0	0	0	0	0	0	0	0	0	0	0	0	0	0	0	0	0	3.14	0	1.05	0	0	0	0	0	0	0	0	--	Biological Process: carbohydrate metabolic process (GO:0005975);; Molecular Function: phosphotransferase activity, alcohol group as acceptor (GO:0016773);;	--	--	ADP-specific Phosphofructokinase/Glucokinase conserved region	--	Uncharacterized protein OS=Globisporangium ultimum (strain ATCC 200006 / CBS 805.95 / DAOM BR144) OX=431595 PE=4 SV=1	--	ADP-dependent glucokinase-like [Rhodamnia argentea]	biological process: metabolic process (GO:0008152);; molecular function: catalytic activity (GO:0003824)	--	LOC115740449
c30637.graph_c0	0	0	0	0	0	0	2.06	0.69	0	0	1	0.33	0	0	0	0	0	0	0	0	0	0	0	0	0	0	0	0	--	--	--	--	--	--	--	--	--	--	--	--
c107682.graph_c0	0	0	0	0	0	0	0	0	0	0	0	0	0	0	0	0	0	0	0	0	0	0	0	0	0	0	0	0	--	--	--	--	--	--	--	--	--	--	--	--
c6253.graph_c0	0	0	0	0	0	0	0	0	0	0	0	0	0	0	0	0	0	0	0	0	0	0	0	0	0	0	0	0	--	--	--	--	--	--	--	--	--	--	--	--
c75841.graph_c0	31.27	31.04	41.95	34.75	35.57	34.34	27.91	32.61	31.53	31.82	29.69	31.01	28.84	25.99	31.53	28.79	32.53	30.27	38.26	33.69	33.67	30.79	32.88	34.18	33.56	28.55	31.29	31.13	--	--	K22763|8.8e-85|sind:105164360|K22763 deubiquitinase DESI2 [EC:3.4.19.12] | (RefSeq) deSI-like protein At4g17486	Function unknown	PPPDE putative peptidase domain	DeSI-like protein At4g17486 OS=Arabidopsis thaliana OX=3702 GN=At4g17486 PE=2 SV=1	DUF862 domain-containing protein OS=Salvia splendens OX=180675 GN=Saspl_010185 PE=3 SV=1	Function unknown	hypothetical protein Saspl_010185 [Salvia splendens]	--	--	--
c85727.graph_c0	0	0	0	0	0	0	0	0	1.1	0	0.41	0.5	1.55	0	1.48	1.01	1.2	1.05	2.01	1.42	0	1.93	1.74	3.29	1.92	0	2.38	1.43	--	--	--	--	--	--	--	--	--	--	--	--
c113218.graph_c0	0	0	0	0	0	0	0	0	0	0	0	0	0	0	0	0	0	0	0	0	0	0	0	0	0	0	0	0	--	--	--	--	--	--	--	--	--	--	--	--
c63628.graph_c0	0	0	0	0	0	0	0	0	0	0	0	0	0	0	0	0	0	0	0.61	0.2	0	0	0	0	0	0	0	0	--	--	--	--	--	--	--	--	--	--	--	--
c82481.graph_c1	0.32	1.18	0.6	0.7	0	0	0.59	0.2	0.53	0	0	0.18	1.43	0.3	1.37	1.03	0.68	0.78	0	0.49	0	1.13	0.38	0	1.12	2.18	0	1.1	--	--	--	--	--	--	--	--	--	--	--	--
c101704.graph_c0	0	0	0	0	0	0	0	0	0	0	0	0	0	0	0	0	0	0	0	0	0	0	0.72	2.15	0	0	0	0	--	--	--	--	--	--	--	--	--	--	--	--
c114460.graph_c0	0	0	0	0	0	0	0	0	0	0	0	0	0	0	0	0	0	0	0	0	0	0	0	0	0	0	0	0	--	--	--	--	--	--	--	--	--	--	--	--
c66401.graph_c1	20.6	20.51	11.8	17.64	22.46	8.93	11.79	14.39	30.97	23.22	27.93	27.37	19.9	15.17	27.28	20.78	24.23	21.69	16.96	20.96	17.44	18.65	20.79	26.28	22.7	19.24	21.25	21.06	--	Molecular Function: protein kinase activity (GO:0004672);; Molecular Function: ATP binding (GO:0005524);;	K08869|1.6e-13|sind:105171857|K08869 aarF domain-containing kinase | (RefSeq) uncharacterized protein LOC105171857	General function prediction only	--	--	AarF domain-containing kinase OS=Salvia splendens OX=180675 GN=ADCK PE=4 SV=1	Function unknown	aarF domain-containing kinase [Salvia splendens]	molecular function: catalytic activity (GO:0003824);; biological process: metabolic process (GO:0008152);; biological process: cellular process (GO:0009987);; molecular function: binding (GO:0005488)	--	--
c66348.graph_c0	1.41	1.63	2.74	1.93	2.26	1.39	2.46	2.04	1.87	1.55	2.31	1.91	2.4	2.56	1.78	2.25	1.91	2.18	3.46	2.52	3.51	2.46	3.03	3.12	4.3	4.66	4.82	4.59	Coenzyme transport and metabolism	Molecular Function: serine C-palmitoyltransferase activity (GO:0004758);; Biological Process: biosynthetic process (GO:0009058);; Molecular Function: pyridoxal phosphate binding (GO:0030170);;	K00654|3.1e-97|sind:105169252|K00654 serine palmitoyltransferase [EC:2.3.1.50] | (RefSeq) long chain base biosynthesis protein 1	Posttranslational modification, protein turnover, chaperones	Aminotransferase class I and II;; Aminotransferase class I and II	Long chain base biosynthesis protein 1 OS=Arabidopsis thaliana OX=3702 GN=LCB1 PE=1 SV=1	Serine palmitoyltransferase OS=Handroanthus impetiginosus OX=429701 GN=CDL12_17198 PE=4 SV=1	Posttranslational modification, protein turnover, chaperones	long chain base biosynthesis protein 1 [Sesamum indicum]	molecular function: catalytic activity (GO:0003824);; biological process: metabolic process (GO:0008152);; molecular function: binding (GO:0005488)	Sphingolipid metabolism (ko00600)	--
c95030.graph_c0	0	0	0	0	0	0	3.22	1.07	0	0	0	0	0	0	0	0	0	0	0	0	0	0	0	0	0	0	0	0	--	--	--	--	--	--	--	--	--	--	--	--
c68408.graph_c0	21.17	20.03	24.11	21.77	19.22	24.43	16.26	19.97	20.22	20.13	20.4	20.25	22.21	21.53	25.67	23.14	19.41	20.6	26.63	22.21	23.67	24.28	24.43	25.35	25.78	19.7	22.46	22.65	--	Biological Process: reproduction (GO:0000003);; Biological Process: microtubule cytoskeleton organization (GO:0000226);; Biological Process: developmental process involved in reproduction (GO:0003006);; Molecular Function: molecular_function (GO:0003674);; Molecular Function: transporter activity (GO:0005215);; Molecular Function: lipid transporter activity (GO:0005319);; Molecular Function: phos…	K02433|1.2e-51|apro:F751_6020|K02433 aspartyl-tRNA(Asn)/glutamyl-tRNA(Gln) amidotransferase subunit A [EC:6.3.5.6 6.3.5.7] | (RefSeq) Glutamyl-tRNA(Gln) amidotransferase subunit A	Lipid transport and metabolism	CRAL/TRIO domain	Phosphatidylinositol/phosphatidylcholine transfer protein SFH6 OS=Arabidopsis thaliana OX=3702 GN=SFH6 PE=2 SV=1	CRAL-TRIO domain-containing protein OS=Salvia splendens OX=180675 GN=Saspl_006799 PE=4 SV=1	Lipid transport and metabolism	hypothetical protein Saspl_006799 [Salvia splendens]	biological process: reproduction (GO:0000003);; biological process: cellular process (GO:0009987);; biological process: cellular component organization or biogenesis (GO:0071840);; biological process: reproductive process (GO:0022414);; biological process: developmental process (GO:0032502);; molecular function: transporter activity (GO:0005215);; biological process: localization (GO:0051179);; b…	Aminoacyl-tRNA biosynthesis (ko00970)	--
c91948.graph_c0	0	0	0	0	0	0	0	0	0	0	0	0	0	0	0	0	0	0	0	0	0	0	0	0	0	0	0	0	--	--	--	--	--	--	--	--	--	--	--	--
c97896.graph_c0	0	0	0	0	0	0	0	0	0	0	0	0	0	0	0	0	0	3.51	0	1.17	0	0	0	0	0	0	0	0	Replication, recombination and repair	Biological Process: base-excision repair (GO:0006284);; Molecular Function: DNA-3-methyladenine glycosylase activity (GO:0008725);;	K01246|2.7e-23|tcc:18606983|K01246 DNA-3-methyladenine glycosylase I [EC:3.2.2.20] | (RefSeq) uncharacterized LOC18606983	--	Methyladenine glycosylase	--	Uncharacterized protein OS=Camellia sinensis var. sinensis OX=542762 GN=TEA_018820 PE=4 SV=1	Nucleotide transport and metabolism	hypothetical protein HYC85_018787 [Camellia sinensis]	biological process: metabolic process (GO:0008152);; biological process: cellular process (GO:0009987);; biological process: response to stimulus (GO:0050896);; molecular function: catalytic activity (GO:0003824)	Base excision repair (ko03410)	--
c108626.graph_c0	0	0	0	0	0	0	0	0	0	2.46	0	0.82	0	0	0	0	0	0	0	0	0	0	0	0	0	0	0	0	--	--	--	--	--	--	--	--	--	--	--	--
c511.graph_c0	0	0	0	0	0	0	0	0	0	0	0	0	0	0	0	0	0.36	0	0	0.12	0.5	1.41	0.64	0	0	0	1.93	0.64	--	--	--	--	--	--	--	--	--	--	--	--
c74187.graph_c0	12.36	12.78	11.2	12.11	12.38	12.2	12.09	12.22	12.73	13.37	10.77	12.29	12.51	10.64	15.72	12.96	17.95	18.62	17.07	17.88	17.65	16.15	16.56	15.88	20.38	19.47	18.36	19.4	--	Molecular Function: mRNA binding (GO:0003729);; Cellular Component: nucleus (GO:0005634);; Cellular Component: cytoplasm (GO:0005737);; Biological Process: regulation of gene expression (GO:0010468);; Molecular Function: metal ion binding (GO:0046872);;	--	General function prediction only	Zinc finger C-x8-C-x5-C-x3-H type (and similar);; CCCH-type zinc finger;; KH domain;; Torus domain;; Zinc finger domain	Zinc finger CCCH domain-containing protein 14 OS=Oryza sativa subsp. japonica OX=39947 GN=Os02g0194200 PE=2 SV=1	Uncharacterized protein OS=Erythranthe guttata OX=4155 GN=MIMGU_mgv1a010945mg PE=4 SV=1	Function unknown	zinc finger CCCH domain-containing protein 14 isoform X1 [Sesamum indicum]	molecular function: binding (GO:0005488);; cellular component: cell (GO:0005623);; cellular component: organelle (GO:0043226);; cellular component: cell part (GO:0044464);; biological process: biological regulation (GO:0065007)	--	LOC105168621
c94829.graph_c0	0	0	0	0	0	0	0.84	0.28	0	0	0	0	0	0	0	0	0	0	0	0	0	0	0	0	0	0	0	0	--	--	--	--	--	--	--	--	--	--	--	--
c79517.graph_c1	31.43	31.68	18.19	27.1	26.13	23.05	28.02	25.73	39.33	28.38	33.11	33.61	32.3	23.14	34.26	29.9	29.63	30.53	31.52	30.56	27.62	32.88	32.48	36.93	36.65	29.89	31.26	32.6	--	--	--	--	--	--	--	--	--	--	--	--
c82043.graph_c0	34.32	43.86	35.37	37.85	27.74	27.17	27.79	27.57	45.48	33.17	52.43	43.69	34.61	40.03	49.46	41.37	34.96	35.08	29.09	33.04	28.12	40.77	33.39	31.29	36.9	40.7	36.76	38.12	--	--	--	--	--	--	Uncharacterized protein OS=Salvia splendens OX=180675 GN=Saspl_043928 PE=4 SV=1	--	hypothetical protein Saspl_043928 [Salvia splendens]	--	--	--
c56856.graph_c0	0	0	1.02	0.34	0	0	0.67	0.22	0.55	0	0	0.18	0	0	0	0	0	0	0	0	0.34	1.16	0.61	0.34	0.32	0	0	0.11	--	--	--	--	--	--	--	--	--	--	--	--
c41604.graph_c0	5.86	2.76	3.22	3.95	4.46	2.29	1.82	2.86	3.32	2.85	0	2.06	4.33	5.26	4.55	4.71	4.44	3.18	4.13	3.92	5.17	4.4	4.42	3.69	1.73	3.86	4.01	3.2	--	--	--	--	--	--	--	--	--	--	--	--
c9687.graph_c0	0	0	0	0	0	0	0	0	0.52	0	0	0.17	0.55	0.62	0	0.39	0	0.5	0.94	0.48	0.58	0	0.39	0.58	0	0	0	0	--	--	--	--	--	--	--	--	--	--	--	--
c76704.graph_c0	12.07	11.26	10.11	11.15	7.7	6.08	9.49	7.76	8.99	6.45	14.07	9.84	10.48	12.65	6.47	9.87	8.02	8.4	6.51	7.64	7.83	12.02	11.44	14.46	9.48	11.52	9.32	10.11	--	--	K06694|4.1e-28|oeu:111381717|K06694 26S proteasome non-ATPase regulatory subunit 10 | (RefSeq) 26S proteasome non-ATPase regulatory subunit 10	Posttranslational modification, protein turnover, chaperones	Ankyrin repeats (3 copies);; Ankyrin repeats (many copies);; Ankyrin repeats (many copies);; Ankyrin repeat;; Ankyrin repeat;; Ankyrin repeat;; Ankyrin repeats (3 copies);; Ankyrin repeat;; Ankyrin repeats (many copies);; Ankyrin repeats (many copies)	--	ANK_REP_REGION domain-containing protein OS=Solanum lycopersicum OX=4081 PE=4 SV=1	Posttranslational modification, protein turnover, chaperones	ankyrin repeat family protein [Striga asiatica]	--	--	--
c75265.graph_c0	49.58	49.48	46.11	48.39	43.05	56.56	48.05	49.22	49.11	36.86	45.3	43.76	48.26	38.9	42.67	43.28	30.81	29.23	33.68	31.24	24.47	29.59	24.52	19.49	23.34	20.06	26.14	23.18	--	Molecular Function: DNA binding (GO:0003677);; Cellular Component: nucleus (GO:0005634);;	K14491|1.0e-11|ats:109775757|K14491 two-component response regulator ARR-B family | (RefSeq) LOC109775757; two-component response regulator ORR22-like	--	Myb-like DNA-binding domain	Transcription activator GLK2 OS=Arabidopsis thaliana OX=3702 GN=GLK2 PE=1 SV=1	HTH myb-type domain-containing protein OS=Salvia splendens OX=180675 GN=Saspl_043442 PE=4 SV=1	Transcription	hypothetical protein Saspl_043442 [Salvia splendens]	molecular function: binding (GO:0005488);; cellular component: cell (GO:0005623);; cellular component: organelle (GO:0043226);; cellular component: cell part (GO:0044464)	Plant hormone signal transduction (ko04075)	--
c86423.graph_c0	0.79	0.37	1.11	0.76	2.49	2.22	0.73	1.81	0	3.29	0.37	1.22	0.35	0.76	0	0.37	3.02	0.64	3.04	2.23	0.37	0.35	0.24	0	0.35	1.55	2.88	1.59	--	--	--	--	--	--	--	--	--	--	--	--
c48117.graph_c0	0.24	0.45	0.23	0.31	1.54	0.51	0	0.68	0.41	0.41	0	0.27	0	0.45	0.63	0.36	0.72	0.6	0.38	0.57	0.46	3.01	1.16	0	0	0	0.89	0.3	--	--	--	--	--	--	--	--	--	--	--	--
c33425.graph_c0	0	0	0	0	0	0	0	0	0	0	0	0	0	0	0	0	0	0	0	0	0	0	0	0	0	0	0	0	--	--	--	--	--	--	--	--	--	--	--	--
c72637.graph_c0	16.81	17.9	22.44	19.05	17.86	13.18	17.71	16.25	20.27	15.67	21.25	19.06	22.47	20.19	18.91	20.52	17.08	17.32	15.73	16.71	18.61	19.6	19.55	20.44	19.61	17.76	21.65	19.67	--	Cellular Component: integral component of membrane (GO:0016021);;	--	--	--	Uncharacterized protein At5g19025 OS=Arabidopsis thaliana OX=3702 GN=At5g19025 PE=2 SV=3	Uncharacterized protein OS=Salvia splendens OX=180675 GN=Saspl_008770 PE=4 SV=1	Function unknown	hypothetical protein Saspl_008770 [Salvia splendens]	cellular component: membrane (GO:0016020);; cellular component: membrane part (GO:0044425)	--	--
c82919.graph_c2	0.18	0	0	0.06	0	0	0	0	0	0.3	0.35	0.22	0.81	0	0.31	0.37	0.13	0.15	0	0.09	0.34	0.32	0.45	0.69	0.16	0.69	0.66	0.5	--	--	--	--	--	--	--	--	--	--	--	--
c40963.graph_c0	1.2	0	0	0.4	2.22	0	0	0.74	0	0	0	0	0	0	0	0	0	0	0	0	0	0	0	0	0	0	0	0	--	--	--	--	--	--	--	--	--	--	--	--
c48088.graph_c0	0	0	0	0	0	0.66	0	0.22	0.25	0	0	0.08	0	0	0.52	0.17	0	0	0	0	0	0	0	0	0	0	0.56	0.19	--	--	--	--	--	--	--	--	--	--	--	--
c50571.graph_c0	2.07	0	0	0.69	0	0	0	0	0	0	0	0	0	0	2.51	0.84	0	1.52	0	0.51	0	0	0	0	0	0	0	0	--	--	--	--	--	--	--	--	--	--	--	--
c99357.graph_c0	0	0	0	0	0	0	0	0	0	0	0	0	0	0	0	0	0	0.77	0	0.26	0	0	0	0	0	0	0	0	--	Molecular Function: protein kinase activity (GO:0004672);; Biological Process: protein phosphorylation (GO:0006468);;	--	Signal transduction mechanisms	Protein tyrosine and serine/threonine kinase	--	--	--	tyrosine-protein kinase Src42A-like [Rhodamnia argentea]	molecular function: catalytic activity (GO:0003824);; biological process: metabolic process (GO:0008152);; biological process: cellular process (GO:0009987)	--	LOC115747275
c81402.graph_c1	1.14	0.79	1.61	1.18	1.03	0.92	1.86	1.27	1.42	0.96	1.9	1.43	1.79	4.27	1.96	2.67	0.81	0	0.67	0.49	1.9	0.25	1.26	1.64	2	0.83	1.57	1.47	--	--	--	--	--	--	--	--	--	--	--	--
c4255.graph_c0	0	0	0	0	0	0	0	0	1	0	0	0.33	0	0	0	0	0	0	0	0	0	0	0	0	0	0	0	0	--	--	--	--	--	--	--	--	--	--	--	--
c97541.graph_c0	0	0	0.28	0.09	0	0	0	0	0	0	0	0	0	0	0.51	0.17	0	0.24	0.23	0.16	0.28	0	0.28	0.56	0.26	0	0	0.09	--	--	--	--	--	--	--	--	--	--	--	--
c100425.graph_c0	0	0	0	0	0	0	0	0	0	0	0	0	0	2.84	0	0.95	0	0	0	0	0	2.25	0.75	0	0	0	0	0	Lipid transport and metabolism	Molecular Function: molecular_function (GO:0003674);; Molecular Function: catalytic activity (GO:0003824);; Molecular Function: 3-hydroxybutyrate dehydrogenase activity (GO:0003858);; Molecular Function: binding (GO:0005488);; Molecular Function: protein binding (GO:0005515);; Cellular Component: cellular_component (GO:0005575);; Cellular Component: intracellular (GO:0005622);; Cellular Component…	K18121|6.1e-09|smo:SELMODRAFT_440437|K18121 glyoxylate/succinic semialdehyde reductase [EC:1.1.1.79 1.1.1.-] | (RefSeq) hypothetical protein	--	NAD binding domain of 6-phosphogluconate dehydrogenase;; NADP oxidoreductase coenzyme F420-dependent;; Shikimate / quinate 5-dehydrogenase	--	Uncharacterized protein OS=Saprolegnia parasitica (strain CBS 223.65) OX=695850 GN=SPRG_10533 PE=4 SV=1	Lipid transport and metabolism	putative oxidoreductase GLYR1 homolog [Rhodamnia argentea]	molecular function: catalytic activity (GO:0003824);; biological process: metabolic process (GO:0008152);; biological process: single-organism process (GO:0044699);; molecular function: binding (GO:0005488);; cellular component: cell (GO:0005623);; cellular component: cell part (GO:0044464);; biological process: response to stimulus (GO:0050896)	Glyoxylate and dicarboxylate metabolism (ko00630);; Butanoate metabolism (ko00650);; Carbon metabolism (ko01200)	--
c114161.graph_c0	0	0	0	0	0	0	0	0	0	0	0	0	0	0	0	0	0	0	0	0	0	0	0	0	0	0	0	0	--	--	--	--	--	--	--	--	--	--	--	--
c82857.graph_c0	30.01	36.55	28.39	31.65	30.86	28.75	37.49	32.37	34.18	29.59	30.12	31.3	37.88	33.32	38.32	36.51	28.54	29.16	22.68	26.79	24.04	35.97	29.94	29.8	34.3	37.82	38.51	36.88	--	Molecular Function: protein kinase activity (GO:0004672);; Molecular Function: ATP binding (GO:0005524);; Cellular Component: integral component of membrane (GO:0016021);;	K00924|6.6e-79|mus:103987754|K00924 kinase [EC:2.7.1.-] | (RefSeq) receptor-like protein kinase HSL1	--	Protein kinase domain;; Protein tyrosine and serine/threonine kinase;; Leucine rich repeat;; Leucine Rich repeats (2 copies)	Receptor protein-tyrosine kinase CEPR1 OS=Arabidopsis thaliana OX=3702 GN=CEPR1 PE=1 SV=1	Somatic embryogenesis receptor kinase 1 OS=Salvia splendens OX=180675 GN=SERK1 PE=4 SV=1	Signal transduction mechanisms	receptor-like protein kinase HSL1 [Sesamum indicum]	molecular function: catalytic activity (GO:0003824);; biological process: metabolic process (GO:0008152);; biological process: cellular process (GO:0009987);; molecular function: binding (GO:0005488);; cellular component: membrane (GO:0016020);; cellular component: membrane part (GO:0044425)	--	LOC105159065
c78182.graph_c1	5.14	6.05	6.74	5.98	3.9	2.82	5.69	4.14	6.3	4.79	3.97	5.02	5.86	4.56	5.45	5.29	5.91	5.33	4.73	5.32	5.26	6.97	6.03	5.87	6.5	10.51	8.11	8.37	--	Molecular Function: double-stranded DNA binding (GO:0003690);; Biological Process: regulation of transcription, DNA-templated (GO:0006355);;	K15032|2.3e-147|sind:105173797|K15032 mTERF domain-containing protein, mitochondrial | (RefSeq) transcription termination factor MTERF4, chloroplastic	--	mTERF	Transcription termination factor MTERF4, chloroplastic OS=Arabidopsis thaliana OX=3702 GN=MTERF4 PE=1 SV=1	Mitochondrial transcription termination factorfamily protein OS=Striga asiatica OX=4170 GN=STAS_35166 PE=3 SV=1	Transcription	transcription termination factor MTERF4, chloroplastic [Sesamum indicum]	molecular function: binding (GO:0005488);; biological process: biological regulation (GO:0065007)	--	LOC105173797
c25475.graph_c0	0	0	0	0	0	0	0	0	0	0	0	0	0	0	0	0	0	0	0	0	0	0	0	0	0	0	0	0	--	--	--	--	--	--	--	--	--	--	--	--
c55370.graph_c0	0.32	0.15	0.31	0.26	0	0.16	0.15	0.1	0	0.82	0.31	0.38	0.59	0.89	0.28	0.59	0	0.53	0.64	0.39	0.31	0.43	0.61	1.1	0.57	0	0.3	0.29	--	--	--	--	--	--	--	--	--	--	--	--
c66597.graph_c0	9.95	11.08	11.18	10.74	10.14	8.3	7.86	8.77	6.71	10.14	10	8.95	11.12	6.69	8.7	8.84	13.4	8.51	9.3	10.4	9.8	10.56	9.94	9.47	8.66	10.67	8.16	9.16	--	Cellular Component: integral component of membrane (GO:0016021);;	--	--	--	--	Uncharacterized protein (Fragment) OS=Genlisea aurea OX=192259 GN=M569_02276 PE=4 SV=1	--	uncharacterized protein LOC105173072 [Sesamum indicum]	cellular component: membrane (GO:0016020);; cellular component: membrane part (GO:0044425)	--	LOC105173072
c93658.graph_c0	0	0	0	0	0	0	0	0	0	0	0	0	0	0	0	0	0	0	0	0	0	0	0	0	0	0	0	0	--	--	--	--	--	--	--	--	--	--	--	--
c32867.graph_c0	0	0	0	0	0	0	0	0	0	0	0	0	0	0	0	0	0	0	0	0	2.23	0	0.74	0	0	0	0	0	--	--	--	--	--	--	--	--	--	--	--	--
c85741.graph_c0	27.28	27.77	27.96	27.67	24.26	21.81	25.72	23.93	28.99	25.61	25.21	26.6	23.9	25.6	27.97	25.82	34.54	32.54	29.59	32.22	29.85	31.39	32.24	35.47	37.23	41.89	31.95	37.02	Translation, ribosomal structure and biogenesis	Molecular Function: aminoacyl-tRNA editing activity (GO:0002161);; Molecular Function: valine-tRNA ligase activity (GO:0004832);; Molecular Function: ATP binding (GO:0005524);; Cellular Component: cytoplasm (GO:0005737);; Biological Process: valyl-tRNA aminoacylation (GO:0006438);;	K01873|0.0e+00|sind:105174323|K01873 valyl-tRNA synthetase [EC:6.1.1.9] | (RefSeq) valine--tRNA ligase, mitochondrial 1	Translation, ribosomal structure and biogenesis	tRNA synthetases class I (I, L, M and V);; Anticodon-binding domain of tRNA ligase;; tRNA synthetases class I (M);; Leucyl-tRNA synthetase, Domain 2;; Valyl tRNA synthetase tRNA binding arm;; tRNA synthetases class I (C) catalytic domain	Valine--tRNA ligase, mitochondrial 1 OS=Arabidopsis thaliana OX=3702 GN=TWN2 PE=1 SV=2	Valyl-tRNA synthetase OS=Salvia splendens OX=180675 GN=VARS PE=3 SV=1	Translation, ribosomal structure and biogenesis	valyl-tRNA synthetase [Salvia splendens]	molecular function: catalytic activity (GO:0003824);; biological process: biological regulation (GO:0065007);; molecular function: binding (GO:0005488);; cellular component: cell (GO:0005623);; cellular component: cell part (GO:0044464);; biological process: metabolic process (GO:0008152);; biological process: cellular process (GO:0009987);; biological process: single-organism process (GO:0044699)	Aminoacyl-tRNA biosynthesis (ko00970)	--
c110616.graph_c0	0	0	0	0	0	0	0	0	0	2.88	0	0.96	0	0	0	0	0	0	0	0	0	0	0	0	0	0	0	0	--	Molecular Function: iron ion binding (GO:0005506);; Biological Process: terpenoid biosynthetic process (GO:0016114);; Molecular Function: 4-hydroxy-3-methylbut-2-en-1-yl diphosphate synthase activity (GO:0046429);;	K03526|1.3e-30|pda:103719733|K03526 (E)-4-hydroxy-3-methylbut-2-enyl-diphosphate synthase [EC:1.17.7.1 1.17.7.3] | (RefSeq) 4-hydroxy-3-methylbut-2-en-1-yl diphosphate synthase (ferredoxin), chloroplastic	--	--	4-hydroxy-3-methylbut-2-en-1-yl diphosphate synthase (ferredoxin), chloroplastic OS=Oryza sativa subsp. japonica OX=39947 GN=ISPG PE=2 SV=1	4-hydroxy-3-methylbut-2-en-1-yl diphosphate synthase OS=Bixa orellana OX=66672 GN=HDS PE=2 SV=1	Lipid transport and metabolism	4-hydroxy-3-methylbut-2-en-1-yl diphosphate synthase [Bixa orellana]	molecular function: binding (GO:0005488);; biological process: metabolic process (GO:0008152);; biological process: cellular process (GO:0009987);; biological process: single-organism process (GO:0044699);; molecular function: catalytic activity (GO:0003824)	Terpenoid backbone biosynthesis (ko00900)	--
c93771.graph_c0	0	0	0	0	0	0	0	0	0	0	0	0	0	0	0	0	0	0	0	0	0	0	0	0	0	0	0	0	--	--	--	--	--	--	--	--	--	--	--	--
c770.graph_c1	0	0	0	0	0	0	0	0	0	0	0	0	0	0	0	0	0	0	0	0	0	0	0	0	0	0	0	0	--	--	--	--	--	--	--	--	--	--	--	--
c57541.graph_c0	0.22	0.2	1.43	0.62	0	0	0.2	0.07	1.08	9.48	0.21	3.59	0	0	0	0	0	0	0.17	0.06	0	0	0	0	0	0.21	0.2	0.14	Function unknown	Cellular Component: integral component of membrane (GO:0016021);;	K03260|4.7e-07|pda:103710480|K03260 translation initiation factor 4G | (RefSeq) eukaryotic translation initiation factor-like	General function prediction only	Proteolipid membrane potential modulator	Hydrophobic protein LTI6A OS=Oryza sativa subsp. japonica OX=39947 GN=LTI6A PE=2 SV=1	Hydrophobic protein LTI6A, putative OS=Ricinus communis OX=3988 GN=RCOM_1436830 PE=3 SV=1	Function unknown	hydrophobic protein RCI2B [Amborella trichopoda]	cellular component: membrane (GO:0016020);; cellular component: membrane part (GO:0044425)	RNA transport (ko03013)	LOC105420327
c73338.graph_c0	0.45	0.79	1.03	0.76	0.49	0.12	1.01	0.54	0.35	0.1	0.38	0.28	0.18	0.56	0.18	0.31	0.42	0.42	0.24	0.36	0.87	0.68	0.84	0.98	0.68	0.43	0.5	0.54	--	Cellular Component: integral component of membrane (GO:0016021);; Molecular Function: transferase activity (GO:0016740);;	K13466|4.1e-58|cic:CICLE_v10017769mg|K13466 EIX receptor 1/2 | (RefSeq) hypothetical protein	General function prediction only	Leucine rich repeat;; Leucine Rich repeats (2 copies);; Leucine Rich Repeat;; Leucine rich repeat N-terminal domain	Receptor-like protein EIX2 OS=Solanum lycopersicum OX=4081 GN=EIX2 PE=1 SV=2	Leucine-rich repeat protein OS=Handroanthus impetiginosus OX=429701 GN=CDL12_00068 PE=4 SV=1	Function unknown	LOW QUALITY PROTEIN: leucine-rich repeat receptor protein kinase MSP1-like [Sesamum indicum]	cellular component: membrane (GO:0016020);; cellular component: membrane part (GO:0044425);; molecular function: catalytic activity (GO:0003824)	Plant-pathogen interaction (ko04626)	LOC105172120
c85115.graph_c0	2.26	1.63	2.67	2.19	2.17	3.62	3.2	3	2.9	2.19	1.52	2.2	3	1.32	2.12	2.15	3.23	2.35	5.86	3.81	2.68	3.17	2.57	1.87	3.54	2.19	2.45	2.73	--	--	--	--	--	--	Uncharacterized protein OS=Salvia splendens OX=180675 GN=Saspl_041521 PE=4 SV=1	--	hypothetical protein Saspl_041521 [Salvia splendens]	--	--	--
c74630.graph_c0	6	6.58	3.83	5.47	6.97	4.26	3.38	4.87	6.13	5.49	5.64	5.75	4.23	3.61	10.07	5.97	4.64	6.11	6.92	5.89	8.11	6.98	7.6	7.71	11.35	10.21	11.17	10.91	Inorganic ion transport and metabolism	Cellular Component: integral component of membrane (GO:0016021);;	--	--	Nodulin-like	Protein NUCLEAR FUSION DEFECTIVE 4 OS=Arabidopsis thaliana OX=3702 GN=NFD4 PE=3 SV=1	Nodulin-like domain-containing protein OS=Handroanthus impetiginosus OX=429701 GN=CDL12_07780 PE=3 SV=1	Function unknown	protein NUCLEAR FUSION DEFECTIVE 4-like [Sesamum indicum]	cellular component: membrane (GO:0016020);; cellular component: membrane part (GO:0044425)	--	LOC105163982
c97038.graph_c0	0	0	0	0	0	0	0	0	0	0	0	0	0	0	0	0	0	0	0	0	0	0	0	0	0	0	0	0	--	--	--	--	--	--	--	Signal transduction mechanisms	--	--	--	--
c102649.graph_c0	0	0	0	0	0	0	0	0	0	0	0	0	0	0	0	0	0	0	0	0	0	0	0	0	0	0	0	0	--	--	--	--	--	--	Uncharacterized protein OS=Hevea brasiliensis OX=3981 GN=GH714_023265 PE=4 SV=1	--	uncharacterized protein LOC107260890 [Ricinus communis]	--	--	--
c69529.graph_c0	11.14	18.4	13.58	14.37	10.84	14.88	10.95	12.22	12.77	12.56	12.55	12.63	12.19	10.16	14.26	12.2	9.88	5.45	4.74	6.69	8.2	8.85	7.95	6.79	8.39	9.71	10.38	9.49	--	Cellular Component: integral component of membrane (GO:0016021);;	--	--	Protein of unknown function (DUF3082)	--	Uncharacterized protein OS=Handroanthus impetiginosus OX=429701 GN=CDL12_23904 PE=4 SV=1	Function unknown	uncharacterized protein LOC105177083, partial [Sesamum indicum]	cellular component: membrane (GO:0016020);; cellular component: membrane part (GO:0044425)	--	LOC105177083
c16187.graph_c0	0	0	0	0	0	0	0	0	0	0	0	0	0	0	0	0	0	0	0	0	0	0	0	0	4.46	0	0	1.49	--	Cellular Component: integral component of membrane (GO:0016021);;	--	--	--	--	Uncharacterized protein OS=Salvia splendens OX=180675 GN=Saspl_049231 PE=4 SV=1	--	hypothetical protein Saspl_049231 [Salvia splendens]	cellular component: membrane (GO:0016020);; cellular component: membrane part (GO:0044425)	--	--
c102542.graph_c0	0	0	0	0	0	0	0.68	0.23	0	0	2.01	0.67	0	0	0	0	0	0	0	0	0	0	0	0	0	0	0	0	--	Biological Process: RNA splicing, via transesterification reactions (GO:0000375);; Biological Process: RNA splicing, via transesterification reactions with bulged adenosine as nucleophile (GO:0000377);; Biological Process: mRNA splicing, via spliceosome (GO:0000398);; Molecular Function: molecular_function (GO:0003674);; Molecular Function: nucleic acid binding (GO:0003676);; Molecular Function: …	K12821|8.1e-11|jre:108983126|K12821 pre-mRNA-processing factor 40 | (RefSeq) pre-mRNA-processing protein 40A-like isoform X1	RNA processing and modification	FF domain	--	Uncharacterized protein OS=Corchorus capsularis OX=210143 GN=CCACVL1_17115 PE=4 SV=1	RNA processing and modification	pre-mRNA-processing factor 40 homolog B-like [Rhodamnia argentea]	biological process: metabolic process (GO:0008152);; biological process: cellular process (GO:0009987);; molecular function: binding (GO:0005488);; cellular component: cell (GO:0005623);; cellular component: cell part (GO:0044464);; cellular component: organelle (GO:0043226);; cellular component: membrane-enclosed lumen (GO:0031974);; cellular component: organelle part (GO:0044422);; cellular com…	Spliceosome (ko03040)	LOC115738462
c37759.graph_c0	0	0	0	0	0	0	0	0	0	0	0	0	0	0	0	0	0	0	0	0	0	0	0	0	0	0	0	0	--	--	--	--	--	--	--	--	--	--	--	--
c99288.graph_c0	0	0	0	0	4.41	0	0	1.47	0	0	0	0	0	0	0	0	0	0	0	0	0	0	0	0	0	0	0	0	--	--	--	--	--	--	--	--	--	--	--	--
c96730.graph_c0	0	0	0	0	0	0	0	0	0.44	0	0.76	0.4	0.24	0	0.46	0.23	0	0	0	0	0.25	0	0.34	0.76	0	0	0	0	--	Biological Process: lipid transport (GO:0006869);; Biological Process: autophagy (GO:0006914);; Molecular Function: lipid binding (GO:0008289);;	--	--	--	Non-specific lipid-transfer protein OS=Pyrus communis OX=23211 PE=1 SV=1	Beclin 1 OS=Salvia splendens OX=180675 GN=BECN1 PE=3 SV=1	Cell wall/membrane/envelope biogenesis	beclin 1 [Salvia splendens]	biological process: single-organism process (GO:0044699);; biological process: localization (GO:0051179);; biological process: metabolic process (GO:0008152);; biological process: cellular process (GO:0009987);; molecular function: binding (GO:0005488)	--	--
c6687.graph_c0	0	0	0	0	0	0	0	0	0	0	0	0	0	0	0	0	0	0	0	0	0	0	0	0	0	0	0	0	--	--	K00161|3.0e-13|gra:105784008|K00161 pyruvate dehydrogenase E1 component alpha subunit [EC:1.2.4.1] | (RefSeq) uncharacterized LOC105784008	--	--	Protein FLX-like 2 OS=Arabidopsis thaliana OX=3702 GN=FLXL2 PE=1 SV=1	Uncharacterized protein OS=Macleaya cordata OX=56857 GN=BVC80_479g7 PE=3 SV=1	Function unknown	protein FLX-like 2 [Pistacia vera]	--	Glycolysis / Gluconeogenesis (ko00010);; Citrate cycle (TCA cycle) (ko00020);; Pyruvate metabolism (ko00620);; Carbon metabolism (ko01200)	LOC116137737
c103525.graph_c0	0	0	0	0	0	0	0	0	0	0	0	0	0	0	0	0	0	0	0	0	0	0	0	0	0	0	0	0	--	Molecular Function: serine-type peptidase activity (GO:0008236);;	--	--	--	--	C-terminal processing peptidase OS=Handroanthus impetiginosus OX=429701 GN=CDL12_27995 PE=3 SV=1	--	C-terminal processing peptidase [Handroanthus impetiginosus]	molecular function: catalytic activity (GO:0003824);; biological process: metabolic process (GO:0008152)	--	--
c114905.graph_c0	0	0	0	0	0	0	0	0	0	0	0	0	0	0	0	0	0	0	0	0	0	0	0	0	0	0	0	0	--	--	--	--	--	--	--	--	--	--	--	--
c44028.graph_c0	0	0	0	0	0	0	0	0	0	0	0	0	0	0	0	0	0	0	0	0	0	0	0	0	0	0	0.86	0.29	--	--	--	--	--	--	--	--	--	--	--	--
c69674.graph_c0	103.41	115.9	106.19	108.5	112.49	146.1	125.93	128.17	114.49	113.79	119.02	115.77	134.7	104.07	112.24	117	89.83	104.6	117.05	103.83	117.22	118.21	115.75	111.83	100.4	100.51	124.08	108.33	--	--	--	--	--	--	--	--	--	--	--	--
c108622.graph_c0	1.42	0	0	0.47	0	0	0	0	0	0	0	0	0	0	0	0	0	0	0	0	0	0	0	0	0	0	0	0	--	--	--	--	Aspartyl protease;; Retroviral aspartyl protease	--	RT_RNaseH_2 domain-containing protein OS=Salvia splendens OX=180675 GN=Saspl_039452 PE=4 SV=1	Replication, recombination and repair	hypothetical protein Saspl_039452 [Salvia splendens]	--	--	--
c106832.graph_c0	0	0	0	0	0	0	0	0	0	0	1.55	0.52	0	0	0	0	0	0	0	0	0	0	0	0	0	0	0	0	--	--	--	--	--	--	--	--	--	--	--	--
c3758.graph_c0	0	0	0	0	0	0	0	0	0	0	0	0	0	0	0	0	0	0	0	0	0	0	0	0	0	0	0	0	--	--	--	--	--	--	--	--	guanine nucleotide-binding protein G(s) subunit alpha-like [Rhodamnia argentea]	--	--	--
c72305.graph_c0	6.81	3.43	8.83	6.36	3.06	3.71	4.92	3.9	2.98	2.52	10.2	5.23	6.17	4.54	3.02	4.58	4.57	5.92	5.18	5.22	5.55	6.17	4.88	2.93	4.9	4.06	6.11	5.02	--	--	--	--	VQ motif	--	VQ domain-containing protein OS=Salvia splendens OX=180675 GN=Saspl_016351 PE=4 SV=1	Function unknown	hypothetical protein Saspl_016351 [Salvia splendens]	--	--	--
c33892.graph_c0	0	0	0	0	0	0	2.32	0.77	0	0	0	0	0	0	0	0	0	0	0	0	0	0	0	0	0	0	0	0	--	--	--	--	--	--	--	--	--	--	--	--
c65007.graph_c0	92.16	72.33	205.21	123.23	116.09	220.15	157.58	164.61	79.22	58.23	154.9	97.45	100.52	103.32	44.04	82.63	39.55	59.19	71.05	56.6	41.19	73.29	54.77	49.83	35.07	36.65	58.86	43.53	--	Cellular Component: chloroplast (GO:0009507);;	K12198|1.5e-19|sita:101765827|K12198 charged multivesicular body protein 5 | (RefSeq) vacuolar protein sorting-associated protein 60.1	--	Light regulated protein Lir1	Light-regulated protein 1, chloroplastic OS=Arabidopsis thaliana OX=3702 GN=LIR1 PE=1 SV=1	Uncharacterized protein OS=Handroanthus impetiginosus OX=429701 GN=CDL12_03043 PE=4 SV=1	Function unknown	hypothetical protein CDL12_03043 [Handroanthus impetiginosus]	cellular component: cell (GO:0005623);; cellular component: organelle (GO:0043226);; cellular component: cell part (GO:0044464)	Endocytosis (ko04144)	--
c72187.graph_c0	0	0	0	0	0	0	0	0	0	0	0	0	1.04	0	0	0.35	0.77	0	1.78	0.85	0	0	0	0	0	0	0	0	--	--	--	--	--	--	--	--	--	--	--	--
c110639.graph_c0	0	0	0	0	0	0	0	0	0	4.27	0	1.42	0	0	0	0	0	0	0	0	0	0	0	0	0	0	0	0	--	Molecular Function: molecular_function (GO:0003674);; Molecular Function: nucleic acid binding (GO:0003676);; Molecular Function: RNA binding (GO:0003723);; Molecular Function: catalytic activity (GO:0003824);; Molecular Function: nuclease activity (GO:0004518);; Molecular Function: endonuclease activity (GO:0004519);; Molecular Function: binding (GO:0005488);; Cellular Component: cellular_compon…	--	General function prediction only	--	Pentatricopeptide repeat-containing protein At1g01970 OS=Arabidopsis thaliana OX=3702 GN=At1g01970 PE=2 SV=1	Putative pentatricopeptide OS=Medicago truncatula OX=3880 GN=MtrunA17_Chr7g0245881 PE=4 SV=1	Function unknown	pentatricopeptide repeat-containing protein At1g01970 isoform X2 [Cucurbita pepo subsp. pepo]	molecular function: binding (GO:0005488);; molecular function: catalytic activity (GO:0003824);; biological process: metabolic process (GO:0008152);; biological process: cellular process (GO:0009987);; cellular component: cell (GO:0005623);; cellular component: cell part (GO:0044464);; cellular component: organelle (GO:0043226)	--	LOC111789812
c104421.graph_c0	0	0	0	0	0	0	0	0	0	0	0	0	0	0	0	0	0	0	0	0	0	0	0	0	0	0	0	0	--	--	--	--	--	--	--	--	--	--	--	--
c34281.graph_c0	0	0	0	0	0	0	0	0	0	0	0	0	0	0	0	0	0	0	0	0	0	0	0	0	0	0	0	0	--	--	--	--	--	--	--	--	--	--	--	--
c76151.graph_c0	53.61	56.78	73.71	61.37	58.98	45.34	56.17	53.5	62.67	50	52.06	54.91	58.42	58.24	55.79	57.48	48.62	45.18	65.74	53.18	59.84	52.45	55.12	53.07	55.22	55.44	48.75	53.14	--	Cellular Component: integral component of membrane (GO:0016021);;	K03240|3.2e-08|smo:SELMODRAFT_166978|K03240 translation initiation factor eIF-2B subunit epsilon | (RefSeq) hypothetical protein	Translation, ribosomal structure and biogenesis	eIF4-gamma/eIF5/eIF2-epsilon	--	W2 domain-containing protein OS=Salvia splendens OX=180675 GN=Saspl_023811 PE=3 SV=1	Translation, ribosomal structure and biogenesis	hypothetical protein Saspl_023811 [Salvia splendens]	cellular component: membrane (GO:0016020);; cellular component: membrane part (GO:0044425)	RNA transport (ko03013)	--
c81483.graph_c0	17.86	20.1	18.45	18.8	16.98	7.77	15.29	13.35	14.27	14.1	13.67	14.01	11.76	11.73	14.57	12.69	19.44	20.84	11.95	17.41	17.5	15.24	16.29	16.13	17.03	29.74	17.99	21.59	Translation, ribosomal structure and biogenesis	Molecular Function: RNA methyltransferase activity (GO:0008173);; Biological Process: tRNA methylation (GO:0030488);; Molecular Function: iron-sulfur cluster binding (GO:0051536);; Biological Process: rRNA base methylation (GO:0070475);;	K06941|3.6e-194|sind:105161275|K06941 23S rRNA (adenine2503-C2)-methyltransferase [EC:2.1.1.192] | (RefSeq) uncharacterized protein LOC105161275	--	Radical SAM superfamily;; 4Fe-4S single cluster domain	--	23S rRNA (Adenine2503-C2)-methyltransferase OS=Salvia splendens OX=180675 GN=rlmN PE=3 SV=1	Translation, ribosomal structure and biogenesis	23S rRNA (adenine2503-C2)-methyltransferase [Salvia splendens]	molecular function: catalytic activity (GO:0003824);; biological process: metabolic process (GO:0008152);; biological process: cellular process (GO:0009987);; molecular function: binding (GO:0005488);; biological process: cellular component organization or biogenesis (GO:0071840)	--	--
c48256.graph_c0	0	0	0	0	0	0	0	0	0	0	0	0	0	0	0.45	0.15	0	0	0	0	0	0	0	0	0	0	0	0	--	--	--	--	--	--	--	--	--	--	--	--
c49637.graph_c0	0	0	0	0	0	0	0	0	0	0	0	0	0	0	0	0	0	0	0	0	0	0	0	0	0	0	0	0	--	--	--	--	--	--	--	--	--	--	--	--
c102794.graph_c0	0	0	0	0	0	0	0	0	0	0	0	0	0	0	0	0	0	0	0	0	0	0	0	0	0	0	0	0	--	--	--	--	--	--	--	--	--	--	--	--
c82182.graph_c0	15.76	14.11	18.07	15.98	16.8	18.47	15.46	16.91	17.62	12.07	13.99	14.56	14.65	13.67	13.87	14.06	15.3	16.03	17.66	16.33	15.34	18.29	15.91	14.11	19.27	15.11	22	18.79	--	--	K11372|1.4e-82|nta:107824241|K11372 HAT1-interacting factor 1 | (RefSeq) protein HGV2-like	--	Tetratricopeptide repeat	--	Uncharacterized protein OS=Salvia splendens OX=180675 GN=Saspl_018238 PE=4 SV=1	--	hypothetical protein Saspl_018238 [Salvia splendens]	--	--	--
c78375.graph_c1	16.69	19.82	17.79	18.1	18.66	19.7	18.62	18.99	21.37	17.5	21.06	19.98	22.79	23.52	16.45	20.92	18.47	20.69	17.16	18.77	18.47	20.07	19.02	18.52	21.84	27.01	20.41	23.09	--	Molecular Function: phosphatidylinositol binding (GO:0035091);;	K17917|2.4e-28|spen:107031806|K17917 sorting nexin-1/2 | (RefSeq) sorting nexin 1	Intracellular trafficking, secretion, and vesicular transport	Vps5 C terminal like;; PX domain	Sorting nexin 2B OS=Arabidopsis thaliana OX=3702 GN=SNX2B PE=1 SV=1	PX domain-containing protein OS=Salvia splendens OX=180675 GN=Saspl_047339 PE=4 SV=1	Intracellular trafficking, secretion, and vesicular transport	hypothetical protein Saspl_047339 [Salvia splendens]	molecular function: binding (GO:0005488)	Endocytosis (ko04144)	--
c87372.graph_c0	0	0.12	0.13	0.08	0.24	0.27	0.13	0.21	0.11	0.68	0.13	0.31	0.12	0.37	0	0.16	1.29	0.66	0.85	0.93	1.16	0.71	0.75	0.39	1.17	0.13	0	0.43	--	Molecular Function: RNA-directed DNA polymerase activity (GO:0003964);;	K11838|1.4e-12|oeu:111383921|K11838 ubiquitin carboxyl-terminal hydrolase 7 [EC:3.4.19.12] | (RefSeq) ubiquitin carboxyl-terminal hydrolase 12-like	--	zinc-binding in reverse transcriptase	--	LINE-1 reverse transcriptase like (Fragment) OS=Trifolium medium OX=97028 GN=A2U01_0003190 PE=4 SV=1	Amino acid transport and metabolism	hypothetical protein TSUD_393040 [Trifolium subterraneum]	molecular function: catalytic activity (GO:0003824);; biological process: metabolic process (GO:0008152);; biological process: cellular process (GO:0009987)	--	--
c26210.graph_c0	0	0.51	0.56	0.36	0	0	0	0	0.15	0	0.73	0.29	0.16	0.66	0	0.27	0.26	0.15	0	0.14	0	0	0	0	0	2.27	0	0.76	--	--	--	--	--	--	--	--	--	--	--	--
c61952.graph_c0	0.79	0.85	0	0.55	0.26	0	0	0.09	0.61	0	0.14	0.25	1.22	0	0	0.41	0	0.26	0.25	0.17	0	0	0.3	0.9	0	0	0.27	0.09	--	--	--	--	--	--	--	--	--	--	--	--
c93915.graph_c0	0	0	0	0	0	0	0.15	0.05	0	0	0	0	0	0	0	0	0	1.05	0	0.35	0	0	0	0	0.56	0.93	0	0.5	Energy production and conversion	Biological Process: photosynthesis (GO:0015979);; Biological Process: chlorophyll biosynthetic process (GO:0015995);; Molecular Function: geranylgeranyl reductase activity (GO:0045550);; Molecular Function: geranylgeranyl diphosphate reductase activity (GO:0102067);;	K10960|6.2e-94|nsy:104227957|K10960 geranylgeranyl diphosphate/geranylgeranyl-bacteriochlorophyllide a reductase [EC:1.3.1.83 1.3.1.111] | (RefSeq) geranylgeranyl diphosphate reductase, chloroplastic	--	FAD binding domain;; Pyridine nucleotide-disulphide oxidoreductase;; Glucose inhibited division protein A	Geranylgeranyl diphosphate reductase, chloroplastic OS=Nicotiana tabacum OX=4097 GN=CHLP PE=2 SV=1	Geranylgeranyl reductase OS=Camellia sinensis OX=4442 GN=chlp PE=2 SV=1	Energy production and conversion	geranylgeranyl diphosphate reductase, chloroplastic [Camellia sinensis]	biological process: metabolic process (GO:0008152);; biological process: cellular process (GO:0009987);; biological process: single-organism process (GO:0044699);; molecular function: catalytic activity (GO:0003824)	Porphyrin and chlorophyll metabolism (ko00860);; Terpenoid backbone biosynthesis (ko00900)	--
c43323.graph_c1	0	0	0	0	0	0	0	0	0	0	0	0	0.8	0	0	0.27	0	0	0	0	0	0	0	0	1.64	0	0	0.55	--	--	--	--	--	--	--	--	--	--	--	--
c42462.graph_c0	0	0	0	0	0	0	0	0	0.36	0	0	0.12	0.38	0	0	0.13	1.1	0	0.66	0.59	0.71	0.76	0.9	1.22	0	1.27	0.79	0.69	--	--	--	--	--	--	--	--	--	--	--	--
c86059.graph_c0	11.91	14.8	14.25	13.65	14.42	15.82	15.31	15.18	17.98	13.4	18.69	16.69	15.05	15.21	20.51	16.92	13.86	18.37	15.64	15.96	16.69	17.38	17.58	18.68	20.55	16.19	17.42	18.05	Replication, recombination and repair	Molecular Function: nucleic acid binding (GO:0003676);; Molecular Function: helicase activity (GO:0004386);; Molecular Function: ATP binding (GO:0005524);;	K12811|0.0e+00|sind:105174347|K12811 ATP-dependent RNA helicase DDX46/PRP5 [EC:3.6.4.13] | (RefSeq) LOW QUALITY PROTEIN: DEAD-box ATP-dependent RNA helicase 42	RNA processing and modification	DEAD/DEAH box helicase;; Helicase conserved C-terminal domain	DEAD-box ATP-dependent RNA helicase 42 OS=Arabidopsis thaliana OX=3702 GN=RH42 PE=1 SV=2	ATP-dependent RNA helicase DDX46/PRP5 OS=Salvia splendens OX=180675 GN=DDX46 PE=4 SV=1	RNA processing and modification	ATP-dependent RNA helicase DDX46/PRP5 [Salvia splendens]	molecular function: binding (GO:0005488);; molecular function: catalytic activity (GO:0003824)	Spliceosome (ko03040)	--
c105944.graph_c0	0	0	0	0	0	0	0	0	0	0	0	0	0	2.13	0	0.71	0	0	0	0	0	0	0	0	0	0	0	0	General function prediction only	Molecular Function: ATP binding (GO:0005524);; Molecular Function: ATPase activity (GO:0016887);;	K03235|2.5e-33|qsu:112004264|K03235 elongation factor 3 | (RefSeq) elongation factor 3-like	--	--	--	Predicted protein OS=Hordeum vulgare subsp. vulgare OX=112509 PE=2 SV=1	--	protein containing adaptin N-terminal region [Moesziomyces antarcticus T-34]	molecular function: binding (GO:0005488);; molecular function: catalytic activity (GO:0003824)	--	--
c29766.graph_c0	1.91	4.48	16.29	7.56	10.5	11.21	2.65	8.12	4.93	0.78	0.87	2.19	5.81	10.25	3.98	6.68	6.19	3.81	6.4	5.47	0.89	5.96	2.87	1.77	2.56	0.97	4.36	2.63	--	Cellular Component: cytoplasm (GO:0005737);; Biological Process: L-phenylalanine catabolic process (GO:0006559);; Molecular Function: ammonia-lyase activity (GO:0016841);;	K10775|4.6e-13|sind:105161317|K10775 phenylalanine ammonia-lyase [EC:4.3.1.24] | (RefSeq) LOW QUALITY PROTEIN: phenylalanine ammonia-lyase-like	Secondary metabolites biosynthesis, transport and catabolism	--	Phenylalanine ammonia-lyase 1 OS=Glycine max OX=3847 GN=PAL1 PE=3 SV=1	Phenylalanine ammonia-lyase OS=Acer yangbiense OX=1000413 GN=EZV62_002412 PE=3 SV=1	Secondary metabolites biosynthesis, transport and catabolism	hypothetical protein EZV62_002412 [Acer yangbiense]	cellular component: cell (GO:0005623);; cellular component: cell part (GO:0044464);; biological process: metabolic process (GO:0008152);; biological process: cellular process (GO:0009987);; biological process: single-organism process (GO:0044699);; molecular function: catalytic activity (GO:0003824)	Phenylalanine metabolism (ko00360);; Phenylpropanoid biosynthesis (ko00940)	--
c23085.graph_c0	0	0	0	0	0	0	0	0	0	2.53	0	0.84	0	0	0	0	0	0	0	0	0	0	0	0	0	0	0	0	--	Cellular Component: mitochondrial outer membrane translocase complex (GO:0005742);; Cellular Component: integral component of membrane (GO:0016021);; Biological Process: protein insertion into mitochondrial outer membrane (GO:0045040);;	--	--	Plant specific mitochondrial import receptor subunit TOM20	Mitochondrial import receptor subunit TOM20 OS=Solanum tuberosum OX=4113 GN=TOM20 PE=1 SV=1	mitochondrial import receptor subunit TOM20-like OS=Nelumbo nucifera OX=4432 GN=LOC104592890 PE=3 SV=1	Intracellular trafficking, secretion, and vesicular transport	PREDICTED: mitochondrial import receptor subunit TOM20-like [Nelumbo nucifera]	cellular component: cell (GO:0005623);; cellular component: membrane (GO:0016020);; cellular component: macromolecular complex (GO:0032991);; cellular component: organelle (GO:0043226);; cellular component: organelle part (GO:0044422);; cellular component: membrane part (GO:0044425);; cellular component: cell part (GO:0044464);; biological process: cellular process (GO:0009987);; biological proce…	--	LOC104592890
c65663.graph_c0	0.44	1.07	0.26	0.59	0.3	1.77	0	0.69	0.11	0.28	0.45	0.28	0.48	0.94	0.69	0.7	0	0.11	0.7	0.27	1.15	0.29	0.6	0.37	0	0	0	0	--	--	--	--	--	--	--	--	--	--	--	--
c96128.graph_c0	0	0	0	0	0	0	0	0	0	0	0.64	0.21	0	0	0	0	0	0	0	0	0.65	0	0.22	0	0.62	0	0	0.21	--	Molecular Function: tRNA binding (GO:0000049);; Molecular Function: aminoacyl-tRNA ligase activity (GO:0004812);; Molecular Function: ATP binding (GO:0005524);; Biological Process: tRNA aminoacylation (GO:0043039);;	--	--	--	--	--	--	--	molecular function: binding (GO:0005488);; molecular function: catalytic activity (GO:0003824);; biological process: metabolic process (GO:0008152);; biological process: cellular process (GO:0009987);; biological process: single-organism process (GO:0044699)	--	--
c68781.graph_c0	0.27	0	0.5	0.26	0	1.18	0.74	0.64	0.98	0.22	0.14	0.45	0.96	0.38	0.58	0.64	0.7	0.23	0.54	0.49	0.38	0.47	0.46	0.53	0.12	0.27	0.37	0.25	--	--	--	--	--	--	--	--	--	--	--	--
c89486.graph_c0	0	0	1.62	0.54	0	0	0	0	0	4.04	0.65	1.56	0	0	0	0	0	0	0.27	0.09	0	0	0	0	0	0	0.31	0.1	--	Molecular Function: iron ion binding (GO:0005506);; Cellular Component: integral component of membrane (GO:0016021);; Molecular Function: oxidoreductase activity, acting on paired donors, with incorporation or reduction of molecular oxygen (GO:0016705);; Molecular Function: heme binding (GO:0020037);;	K13083|1.2e-55|nnu:104590495|K13083 flavonoid 3',5'-hydroxylase [EC:1.14.14.81] | (RefSeq) flavonoid 3',5'-hydroxylase 2-like	Secondary metabolites biosynthesis, transport and catabolism	Cytochrome P450	Flavonoid 3',5'-hydroxylase OS=Solanum melongena OX=4111 GN=CYP75A2 PE=2 SV=1	flavonoid 3',5'-hydroxylase 2-like OS=Nelumbo nucifera OX=4432 GN=LOC104590495 PE=4 SV=1	Secondary metabolites biosynthesis, transport and catabolism	PREDICTED: flavonoid 3',5'-hydroxylase 2-like [Nelumbo nucifera]	molecular function: binding (GO:0005488);; cellular component: membrane (GO:0016020);; cellular component: membrane part (GO:0044425);; molecular function: catalytic activity (GO:0003824);; biological process: metabolic process (GO:0008152);; biological process: single-organism process (GO:0044699)	Flavonoid biosynthesis (ko00941);; Flavone and flavonol biosynthesis (ko00944)	LOC104590495
c84023.graph_c0	16.11	18.32	22.84	19.09	21.97	20.4	20.75	21.04	21.31	17.89	23.78	20.99	23.78	25.06	20.07	22.97	21.27	22.34	26.09	23.23	24.44	25.77	25.62	26.65	22.98	24.97	26.14	24.7	--	--	--	--	--	--	Uncharacterized protein OS=Salvia splendens OX=180675 GN=Saspl_000477 PE=4 SV=1	--	hypothetical protein Saspl_000477 [Salvia splendens]	--	--	--
c67668.graph_c0	77.95	75.94	82.74	78.88	79.61	66.39	78.41	74.8	87.21	65.16	86.13	79.5	97.58	79.86	86.49	87.98	74.47	73.22	82.98	76.89	100.57	80.84	88.76	84.88	88.91	90.29	90.23	89.81	--	--	--	--	--	--	--	--	--	--	--	--
c67412.graph_c0	52.53	49.95	69.07	57.18	56.83	60.33	60.31	59.16	62.48	64.63	56.92	61.34	70.66	71.72	48.48	63.62	70.53	73	81.19	74.91	86.14	95.14	86.35	77.77	78.4	80.15	78.83	79.13	Posttranslational modification, protein turnover, chaperones	Molecular Function: peptidyl-prolyl cis-trans isomerase activity (GO:0003755);; Biological Process: protein folding (GO:0006457);;	K01802|5.2e-106|sind:105163954|K01802 peptidylprolyl isomerase [EC:5.2.1.8] | (RefSeq) peptidyl-prolyl cis-trans isomerase CYP20-1	Posttranslational modification, protein turnover, chaperones	Cyclophilin type peptidyl-prolyl cis-trans isomerase/CLD	Peptidyl-prolyl cis-trans isomerase CYP20-1 OS=Arabidopsis thaliana OX=3702 GN=CYP20-1 PE=1 SV=1	Peptidyl-prolyl cis-trans isomerase OS=Salvia splendens OX=180675 GN=Saspl_050079 PE=3 SV=1	Posttranslational modification, protein turnover, chaperones	hypothetical protein Saspl_050079 [Salvia splendens]	molecular function: catalytic activity (GO:0003824);; biological process: metabolic process (GO:0008152);; biological process: cellular process (GO:0009987)	--	--
c100423.graph_c0	0	0	0	0	0	0	0	0	0	0	0	0	0	5.24	0	1.75	0	0	0	0	0	0	0	0	0	0	0	0	RNA processing and modification	--	--	--	--	--	--	--	hypothetical protein G195_002030 [Phytophthora kernoviae 00238/432]	--	--	--
c72027.graph_c0	3.98	4.42	8.67	5.69	5.4	2.25	3.31	3.65	4.16	2.41	4.04	3.54	3.91	4.69	2.2	3.6	4.99	3.41	14.6	7.67	16.35	7.92	9.84	5.26	6.76	4.49	6.82	6.02	--	Cellular Component: integral component of membrane (GO:0016021);;	--	--	AWPM-19-like family	--	Uncharacterized protein OS=Salvia splendens OX=180675 GN=Saspl_005860 PE=4 SV=1	Function unknown	uncharacterized protein LOC105171413 [Sesamum indicum]	cellular component: membrane (GO:0016020);; cellular component: membrane part (GO:0044425)	--	LOC105171413
c66629.graph_c0	13.9	14.03	17.68	15.2	13.41	11.86	13.63	12.97	13.87	14.69	12.5	13.69	10.14	12.02	12.17	11.44	11.24	11.19	13.07	11.83	11.49	14.07	12.27	11.24	17.58	16.13	13.4	15.7	--	Molecular Function: metal ion binding (GO:0046872);;	--	--	--	--	PHD-type domain-containing protein OS=Salvia splendens OX=180675 GN=Saspl_031435 PE=4 SV=1	Posttranslational modification, protein turnover, chaperones	hypothetical protein Saspl_031435 [Salvia splendens]	molecular function: binding (GO:0005488)	--	--
c91627.graph_c0	0	0	0	0	0	0	0	0	0	0	0	0	0.93	0	0	0.31	0	0	0	0	0	0	0	0	0	0	0	0	--	--	--	--	--	--	--	--	--	--	--	--
c30127.graph_c0	0.81	0.5	0.13	0.48	0.85	0.4	0.13	0.46	0.11	0	0.39	0.17	0.61	0	0.7	0.44	0.2	0	0.64	0.28	0	0.24	0.34	0.78	0.24	0.39	0	0.21	--	--	--	--	--	--	--	--	--	--	--	--
c39386.graph_c0	0	0	0	0	0	0	0	0	1.05	0	0	0.35	0	0.33	0.63	0.32	0	0	0	0	0	0	0	0	0	0	0.17	0.06	--	--	--	--	--	--	--	--	--	--	--	--
c31219.graph_c0	0.81	0.48	0.84	0.71	0.73	0.63	1.98	1.11	0.48	1.6	0.72	0.93	0.88	0.83	0.39	0.7	1.48	0.82	0.45	0.92	1.14	1.79	1.28	0.9	0.92	1.92	1.14	1.33	--	Molecular Function: nucleic acid binding (GO:0003676);; Molecular Function: zinc ion binding (GO:0008270);;	K01213|5.1e-18|cpep:111802094|K01213 galacturan 1,4-alpha-galacturonidase [EC:3.2.1.67] | (RefSeq) exopolygalacturonase-like	--	gag-polypeptide of LTR copia-type;; Retrotransposon gag protein;; gag-polypeptide of LTR copia-type;; GAG-pre-integrase domain	--	Uncharacterized protein OS=Salvia splendens OX=180675 GN=Saspl_020342 PE=4 SV=1	Replication, recombination and repair	hypothetical protein Saspl_020342 [Salvia splendens]	molecular function: binding (GO:0005488)	Pentose and glucuronate interconversions (ko00040)	--
c109347.graph_c0	0	0	0	0	0	0	0	0	0	0	0	0	0	0	0	0	0	0	0	0	0	0	0	0	0	0	0	0	--	--	--	--	--	--	--	--	--	--	--	--
c109144.graph_c0	0	0	0	0	0	0	0	0	0	0	0	0	0	0	0	0	0	0	0	0	0	3.12	1.04	0	0	0	0	0	--	--	--	--	--	--	--	--	--	--	--	--
c41070.graph_c1	0.92	0	0	0.31	0	0	0	0	0	0	0	0	0	0	0	0	0.5	0	0	0.17	0.66	0	0.37	0.44	0.41	0	0	0.14	--	--	--	--	--	--	--	--	--	--	--	--
c103589.graph_c0	0	0	0	0	0	0	0	0	0	0	0	0	0	3.59	0	1.2	0	0	0	0	0	0	0	0	0	0	0	0	--	--	--	--	--	--	--	--	--	--	--	--
c53666.graph_c0	0	0.3	1.21	0.5	0	0	0.9	0.3	0.8	2.42	0.3	1.17	0.29	1.21	1.36	0.95	2.71	1.3	2.97	2.33	2.75	1.97	2.7	3.37	3.37	2.19	2.35	2.64	--	--	--	--	--	--	--	--	--	--	--	--
c58037.graph_c0	0	0	0	0	0.73	0	0	0.24	0.73	0	0	0.24	0.76	0.62	0.74	0.71	0.16	0	0.34	0.17	0	0	0.06	0.19	0.18	0	0.74	0.31	--	--	--	--	--	--	--	--	--	--	--	--
c31142.graph_c0	0	0	0	0	0	0	0	0	0	0	0	0	0	0	0	0	0.54	0	0	0.18	0	0	0	0	0	0	0	0	--	--	--	--	--	--	Charged multivesicular body protein 7 OS=Salvia splendens OX=180675 GN=CHMP7 PE=4 SV=1	--	--	--	--	--
c97127.graph_c0	1.63	0	0	0.54	0	0	0	0	0	0	0	0	0	0	0	0	0	0	0	0	0	0	0	0	0	0	0	0	--	--	--	--	--	--	--	--	--	--	--	--
c102311.graph_c0	0.41	0	0	0.14	0.74	0	0.38	0.37	0	0	0	0	0	0	0	0	0	0.33	0	0.11	0	0	0	0	0	0.4	0	0.13	--	--	--	--	--	--	--	--	--	--	--	--
c105285.graph_c0	0	0	0	0	0	0	0	0	0	0	3.54	1.18	0	0	0	0	0	0	0	0	0	0	1.22	3.65	0	0	0	0	--	Molecular Function: protein dimerization activity (GO:0046983);;	--	--	--	--	BHLH domain-containing protein OS=Salvia splendens OX=180675 GN=Saspl_021969 PE=4 SV=1	Function unknown	hypothetical protein Saspl_021081 [Salvia splendens]	molecular function: binding (GO:0005488)	--	--
c3145.graph_c0	0	0	0	0	0	0	0	0	0	0	0	0	0	0	0	0	0	2.22	0	0.74	0	0	0	0	0.62	0	0	0.21	--	--	--	Posttranslational modification, protein turnover, chaperones	--	--	RING-type domain-containing protein OS=Camellia sinensis var. sinensis OX=542762 GN=TEA_020012 PE=4 SV=1	Posttranslational modification, protein turnover, chaperones	uncharacterized protein LOC114303905 isoform X1 [Camellia sinensis]	--	--	LOC114303905
c100864.graph_c0	0	0	0	0	0.38	0	0	0.13	0	0	0	0	0	0	0.72	0.24	0	0	0	0	0	0	0	0	0	0	0	0	--	Molecular Function: nucleic acid binding (GO:0003676);; Molecular Function: aspartic-type endopeptidase activity (GO:0004190);; Molecular Function: zinc ion binding (GO:0008270);; Biological Process: DNA integration (GO:0015074);;	--	--	--	--	Endonuclease OS=Cucumis melo var. makuwa OX=1194695 GN=E6C27_scaffold1484G00070 PE=4 SV=1	Replication, recombination and repair	uncharacterized protein LOC116406054 [Cucumis sativus]	molecular function: binding (GO:0005488);; molecular function: catalytic activity (GO:0003824);; biological process: metabolic process (GO:0008152);; biological process: cellular process (GO:0009987)	--	LOC116406054
c13989.graph_c0	0	0	0	0	0	0	0	0	0.22	0	0	0.07	0	0	0	0	0	0.85	0.82	0.56	0	0	0	0	0	0	0	0	--	Molecular Function: protein C-terminal S-isoprenylcysteine carboxyl O-methyltransferase activity (GO:0004671);; Cellular Component: endoplasmic reticulum membrane (GO:0005789);; Cellular Component: integral component of membrane (GO:0016021);;	--	Posttranslational modification, protein turnover, chaperones	--	--	Protein-S-isoprenylcysteine O-methyltransferase OS=Saprolegnia parasitica (strain CBS 223.65) OX=695850 GN=SPRG_05716 PE=3 SV=1	--	hypothetical protein T551_02897 [Pneumocystis jirovecii RU7]	molecular function: catalytic activity (GO:0003824);; biological process: metabolic process (GO:0008152);; biological process: cellular process (GO:0009987);; cellular component: cell (GO:0005623);; cellular component: membrane (GO:0016020);; cellular component: organelle (GO:0043226);; cellular component: organelle part (GO:0044422);; cellular component: membrane part (GO:0044425);; cellular com…	--	T551_02897
c58574.graph_c0	1.46	1.09	1.94	1.5	1.32	1.89	0.82	1.34	1.51	0.74	1.22	1.16	0.79	1.38	1.76	1.31	1.46	0.48	2.14	1.36	1.95	1.56	1.96	2.36	1.29	3.71	1.88	2.29	--	--	--	--	--	--	--	--	--	--	--	--
c35801.graph_c0	0	0	0	0	0	0	0	0	0	0	0	0	0	0	0	0	0	0	0	0	0	0	0	0	0	0	0	0	--	--	K17604|1.6e-06|ghi:107892715|K17604 zinc finger SWIM domain-containing protein 3 | (RefSeq) protein FAR1-RELATED SEQUENCE 5-like	General function prediction only	--	--	uncharacterized protein LOC108995373 OS=Juglans regia OX=51240 GN=LOC108995373 PE=4 SV=1	Replication, recombination and repair	uncharacterized protein LOC111380514 [Olea europaea var. sylvestris]	--	--	LOC111380514
c68521.graph_c0	24.13	16.65	26.65	22.48	22.61	15.99	19.9	19.5	24.04	17.85	18.89	20.26	27.57	25.01	24.84	25.81	24.26	20.61	27.46	24.11	28.55	24.8	26.71	26.79	26.22	21.63	30.76	26.2	--	--	--	--	Myb/SANT-like DNA-binding domain	--	Myb_DNA-bind_3 domain-containing protein OS=Salvia splendens OX=180675 GN=Saspl_028416 PE=4 SV=1	--	hypothetical protein Saspl_028416 [Salvia splendens]	--	--	--
c94232.graph_c0	0	0	0.5	0.17	0	0.64	0	0.21	0	0.89	0	0.3	0	0	0	0	0	0	0	0	0	0	0	0	0	0	0	0	--	Biological Process: reproduction (GO:0000003);; Biological Process: cell morphogenesis (GO:0000902);; Biological Process: cell morphogenesis involved in differentiation (GO:0000904);; Biological Process: developmental process involved in reproduction (GO:0003006);; Cellular Component: cellular_component (GO:0005575);; Cellular Component: intracellular (GO:0005622);; Cellular Component: obsolete c…	K09490|2.9e-44|mdm:103450916|K09490 endoplasmic reticulum chaperone BiP [EC:3.6.4.10] | (RefSeq) luminal-binding protein 5-like	Posttranslational modification, protein turnover, chaperones	Hsp70 protein	Luminal-binding protein 4 OS=Nicotiana tabacum OX=4097 GN=BIP4 PE=2 SV=1	Uncharacterized protein OS=Malus domestica OX=3750 GN=DVH24_036598 PE=4 SV=1	Posttranslational modification, protein turnover, chaperones	luminal-binding protein 5-like [Malus domestica]	biological process: reproduction (GO:0000003);; biological process: cellular process (GO:0009987);; biological process: developmental process (GO:0032502);; biological process: single-organism process (GO:0044699);; biological process: cellular component organization or biogenesis (GO:0071840);; biological process: reproductive process (GO:0022414);; cellular component: cell (GO:0005623);; cellul…	Protein export (ko03060);; Protein processing in endoplasmic reticulum (ko04141)	LOC103450916
c92998.graph_c0	0	0	0	0	0	0	0.73	0.24	0	0	0.37	0.12	1.39	0	0	0.46	0	1.26	0	0.42	0	0	0	0	0	0	0	0	--	--	--	--	--	--	--	--	--	--	--	--
c90498.graph_c0	0	0	0	0	0	0	0	0	0	0	0	0	1.2	0	0	0.4	0	0	0.51	0.17	0	0	0	0	0	0	0	0	--	--	--	--	--	--	--	--	--	--	--	--
c76156.graph_c2	38.66	34	26.36	33.01	30.11	30.53	33.35	31.33	34.12	31.69	34.19	33.33	35.65	30.33	41.43	35.8	21.27	26.75	40.84	29.62	32.34	33.12	35.92	42.29	41.4	36.14	32.42	36.65	--	--	--	--	--	--	--	--	--	--	--	--
c8174.graph_c0	0	0	0	0	0	0	0	0	0	0	0	0	0	0	0	0	0	0	0	0	0	0	0	0	1.06	0	0	0.35	--	Molecular Function: acid phosphatase activity (GO:0003993);; Molecular Function: metal ion binding (GO:0046872);;	K22390|3.7e-33|oeu:111390687|K22390 acid phosphatase type 7 | (RefSeq) bifunctional purple acid phosphatase 26-like	Carbohydrate transport and metabolism	Iron/zinc purple acid phosphatase-like protein C	Bifunctional purple acid phosphatase 26 OS=Arabidopsis thaliana OX=3702 GN=PAP26 PE=1 SV=1	Purple acid phosphatase OS=Salvia splendens OX=180675 GN=Saspl_047753 PE=3 SV=1	Carbohydrate transport and metabolism	hypothetical protein Saspl_047753 [Salvia splendens]	molecular function: catalytic activity (GO:0003824);; biological process: metabolic process (GO:0008152);; biological process: cellular process (GO:0009987);; molecular function: binding (GO:0005488)	--	--
c90878.graph_c0	0	0	0	0	0	0	0.67	0.22	0	0	0	0	0	0	0	0	0	0	0	0	0	1.28	0.43	0	0	0	0	0	--	--	--	--	--	--	--	--	--	--	--	--
c81615.graph_c0	39.88	35.82	33.39	36.36	37.07	36.18	43.61	38.95	51.53	56.07	58.61	55.4	55.24	73.18	55.04	61.15	45.74	55.51	54.45	51.9	60.21	73.92	68.99	72.84	74.26	73.02	62.58	69.95	--	Biological Process: lipid catabolic process (GO:0016042);;	--	--	Lipase (class 3);; Lipase 3 N-terminal region	--	Uncharacterized protein OS=Salvia splendens OX=180675 GN=Saspl_038286 PE=4 SV=1	--	uncharacterized protein LOC105172455 isoform X2 [Sesamum indicum]	biological process: metabolic process (GO:0008152);; biological process: single-organism process (GO:0044699)	--	LOC105172455
c103364.graph_c0	0	0	0	0	0	0	0	0	0	0	0	0	0	0	0	0	0	0	0	0	0	0	0	0	0	0	0	0	--	Cellular Component: integral component of membrane (GO:0016021);;	--	--	zinc-binding in reverse transcriptase	--	Glutamate-gated kainate-type ion channel receptor subunit GluR5 OS=Trifolium medium OX=97028 GN=A2U01_0008391 PE=4 SV=1	Function unknown	uncharacterized protein LOC112416671 [Medicago truncatula]	cellular component: membrane (GO:0016020);; cellular component: membrane part (GO:0044425)	--	LOC112416671
c74201.graph_c0	10.64	10.53	14.53	11.9	13.11	8.5	9.08	10.23	11.3	10.4	7.93	9.88	9.68	9.56	12.07	10.44	16.52	12.82	15.69	15.01	14.98	13.55	14.14	13.89	16.44	15.51	13.49	15.15	--	Cellular Component: cytoplasm (GO:0005737);; Biological Process: protein import into nucleus (GO:0006606);; Cellular Component: host cell nucleus (GO:0042025);; Molecular Function: nuclear import signal receptor activity (GO:0061608);;	K15042|5.3e-82|ccav:112502708|K15042 importin subunit alpha-6/7 | (RefSeq) importin subunit alpha-1-like	Intracellular trafficking, secretion, and vesicular transport	Armadillo/beta-catenin-like repeat;; Atypical Arm repeat	Importin subunit alpha-1b OS=Oryza sativa subsp. japonica OX=39947 GN=Os05g0155601 PE=1 SV=2	Importin subunit alpha OS=Cynara cardunculus var. scolymus OX=59895 GN=Ccrd_024605 PE=3 SV=1	Intracellular trafficking, secretion, and vesicular transport	importin subunit alpha-1-like [Cynara cardunculus var. scolymus]	cellular component: cell (GO:0005623);; cellular component: cell part (GO:0044464);; biological process: single-organism process (GO:0044699);; biological process: localization (GO:0051179);; cellular component: other organism (GO:0044215);; cellular component: other organism part (GO:0044217);; molecular function: transporter activity (GO:0005215)	--	LOC112502708
c89437.graph_c0	0	0	0	0	0	0	0	0	0	0	0	0	0	0	0	0	0	0	0	0	0	0	0	0	0	0	0	0	--	--	--	--	--	--	--	--	--	--	--	--
c98909.graph_c0	0	0	0	0	0.5	0	0	0.17	0	0	0	0	0	0	0	0	1.13	0	0	0.38	0	0	0	0	0	0	0	0	--	--	--	--	--	--	--	--	--	--	--	--
c76314.graph_c0	0	0.26	0.52	0.26	0	0.3	0.26	0.19	0	0.16	0.53	0.23	0.52	1.04	0.17	0.58	0.4	0.32	0.22	0.31	0	0.24	0.26	0.53	0	0	0	0	--	--	--	--	--	--	--	--	--	--	--	--
c92358.graph_c0	0	0	1.5	0.5	0	0	0	0	0	0	0	0	0	0	0	0	0	0	0	0	2.23	0	0.74	0	0	0	0	0	--	--	--	--	--	--	--	--	--	--	--	--
c100367.graph_c0	0	0	0	0	0	0	0	0	0	0	0	0	0	0	0	0	0	0	0	0	0	0	0	0	0	0	2.53	0.84	--	--	--	--	--	--	--	--	--	--	--	--
c72142.graph_c0	62.71	64.54	75.29	67.51	67.18	69.5	66.78	67.82	75.73	77.46	65.1	72.76	79.71	68.79	73.71	74.07	88.59	81.01	84.56	84.72	79.14	81.04	78.66	75.81	84.54	91.08	74.59	83.4	--	Cellular Component: integral component of membrane (GO:0016021);; Cellular Component: TIM22 mitochondrial import inner membrane insertion complex (GO:0042721);; Biological Process: protein insertion into mitochondrial inner membrane (GO:0045039);;	K17790|6.6e-61|sind:105159700|K17790 mitochondrial import inner membrane translocase subunit TIM22 | (RefSeq) outer envelope pore protein 16-3, chloroplastic/mitochondrial-like isoform X1	Intracellular trafficking, secretion, and vesicular transport	Tim17/Tim22/Tim23/Pmp24 family	Outer envelope pore protein 16-3, chloroplastic/mitochondrial OS=Arabidopsis thaliana OX=3702 GN=OEP163 PE=1 SV=1	Uncharacterized protein OS=Salvia splendens OX=180675 GN=Saspl_011667 PE=4 SV=1	Intracellular trafficking, secretion, and vesicular transport	hypothetical protein Saspl_011667 [Salvia splendens]	cellular component: membrane (GO:0016020);; cellular component: membrane part (GO:0044425);; cellular component: cell (GO:0005623);; cellular component: macromolecular complex (GO:0032991);; cellular component: organelle (GO:0043226);; cellular component: organelle part (GO:0044422);; cellular component: cell part (GO:0044464);; biological process: cellular process (GO:0009987);; biological proce…	--	--
c85989.graph_c0	1.77	2.28	1.77	1.94	2.26	2.03	2.73	2.34	2.41	2.5	2.54	2.48	2.66	2.38	3.03	2.69	1.43	2.15	2.09	1.89	2.33	2.25	2.44	2.75	2.64	2.2	2.39	2.41	--	--	--	--	--	--	--	--	--	--	--	--
c98368.graph_c0	0	0	0	0	0	0	0	0	0	0	3.42	1.14	0	0	0	0	0	0	0	0	0	0	0	0	0	0	0	0	--	--	--	--	--	--	--	--	--	--	--	--
c107250.graph_c0	0	0	0	0	0	0	0	0	0	0	0	0	2.46	0	0	0.82	0	0	0	0	0	0	0	0	0	0	0	0	--	--	--	--	--	--	--	--	--	--	--	--
c109972.graph_c0	0	0	0	0	0	0	0	0	0	0	0	0	0	0	0	0	0	0	0	0	0	0	0	0	0	0	0	0	--	--	--	--	--	--	--	--	--	--	--	--
c15415.graph_c0	0	0	0	0	0	0	0	0	0	0	0	0	0	0.93	0	0.31	0	0	0	0	0	0	0	0	0	0	0	0	--	Biological Process: reproduction (GO:0000003);; Biological Process: microtubule cytoskeleton organization (GO:0000226);; Biological Process: mitotic cell cycle (GO:0000278);; Biological Process: nuclear division (GO:0000280);; Cellular Component: spindle pole (GO:0000922);; Cellular Component: equatorial microtubule organizing center (GO:0000923);; Cellular Component: gamma-tubulin complex (GO:00…	K16570|1.2e-08|pda:103708626|K16570 gamma-tubulin complex component 3 | (RefSeq) LOW QUALITY PROTEIN: gamma-tubulin complex component 3-like	Cytoskeleton	Gamma tubulin complex component C-terminal	Gamma-tubulin complex component 3 OS=Arabidopsis thaliana OX=3702 GN=GCP3 PE=1 SV=1	Spindle pole body component OS=Phytophthora infestans (strain T30-4) OX=403677 GN=PITG_11106 PE=3 SV=1	Cytoskeleton	gamma-tubulin complex component, putative [Phytophthora infestans T30-4]	biological process: reproduction (GO:0000003);; biological process: cellular process (GO:0009987);; biological process: cellular component organization or biogenesis (GO:0071840);; biological process: single-organism process (GO:0044699);; cellular component: cell (GO:0005623);; cellular component: organelle (GO:0043226);; cellular component: organelle part (GO:0044422);; cellular component: cell…	--	PITG_11106
c97494.graph_c0	0	0	1.81	0.6	0	0	0	0	0	0	0	0	0	0	0	0	0	0	0	0	0	0	0	0	0	0	1.75	0.58	--	Molecular Function: nucleic acid binding (GO:0003676);; Molecular Function: zinc ion binding (GO:0008270);; Biological Process: DNA integration (GO:0015074);;	K14508|5.6e-10|peq:110030046|K14508 regulatory protein NPR1 | (RefSeq) BTB/POZ domain and ankyrin repeat-containing protein NPR5-like	--	--	--	Uncharacterized protein (Fragment) OS=Prunus dulcis OX=3755 GN=Prudu_1246S000200 PE=4 SV=1	Posttranslational modification, protein turnover, chaperones	peroxidase 42-like [Prunus dulcis]	molecular function: binding (GO:0005488);; biological process: metabolic process (GO:0008152);; biological process: cellular process (GO:0009987)	Plant hormone signal transduction (ko04075)	LOC117624137
c84556.graph_c0	5.3	4.94	5.28	5.17	5.46	5.03	5.15	5.21	4.85	5.51	5.44	5.27	6.12	5.78	6.8	6.23	4.15	4.69	5.6	4.81	4.81	5.13	4.79	4.43	4.88	4.61	4.22	4.57	--	Molecular Function: nucleic acid binding (GO:0003676);; Molecular Function: aspartic-type endopeptidase activity (GO:0004190);; Biological Process: DNA integration (GO:0015074);;	K12349|2.0e-95|ccaj:109806181|K12349 neutral ceramidase [EC:3.5.1.23] | (RefSeq) neutral ceramidase-like	General function prediction only	RNase H-like domain found in reverse transcriptase;; RNase H-like domain found in reverse transcriptase;; Integrase zinc binding domain;; Integrase core domain;; Retroviral aspartyl protease;; Retrotransposon gag protein;; Reverse transcriptase (RNA-dependent DNA polymerase)	Uncharacterized mitochondrial protein AtMg00860 OS=Arabidopsis thaliana OX=3702 GN=AtMg00860 PE=4 SV=1	Uncharacterized protein OS=Phaseolus angularis OX=3914 GN=LR48_Vigan08g059400 PE=4 SV=1	Lipid transport and metabolism	hypothetical protein LR48_Vigan08g059400 [Vigna angularis]	molecular function: binding (GO:0005488);; molecular function: catalytic activity (GO:0003824);; biological process: metabolic process (GO:0008152);; biological process: cellular process (GO:0009987)	Sphingolipid metabolism (ko00600)	--
c110866.graph_c0	0	0	0	0	0	0	0	0	0	0	0	0	0	0	0	0	0	0	0	0	0	0	1.22	3.67	0	0	0	0	--	--	--	Signal transduction mechanisms	--	--	--	--	low-density lipoprotein receptor-related protein 2-like [Rhodamnia argentea]	--	--	--
c114872.graph_c0	0	0	0	0	0	0	0	0	0	2.65	0	0.88	0	0	0	0	0	0	0	0	0	0	0	0	0	0	0	0	--	--	--	--	--	--	--	--	--	--	--	--
c79788.graph_c1	13.57	9.04	15.38	12.66	8.57	12.34	13.75	11.55	14.51	13.8	16.97	15.09	18.16	35.02	19.18	24.12	19.24	23.97	20.87	21.36	28.52	39.12	32.85	30.9	27.88	31.39	27.54	28.94	--	Molecular Function: DNA-binding transcription factor activity (GO:0003700);; Cellular Component: nucleus (GO:0005634);; Molecular Function: sequence-specific DNA binding (GO:0043565);;	K13424|9.1e-103|sind:105163923|K13424 WRKY transcription factor 33 | (RefSeq) probable WRKY transcription factor 25	--	WRKY DNA -binding domain	WRKY transcription factor WRKY24 OS=Oryza sativa subsp. japonica OX=39947 GN=WRKY24 PE=2 SV=1	WRKY protein OS=Salvia miltiorrhiza OX=226208 GN=WRKY2 PE=2 SV=1	Transcription	WRKY protein [Salvia miltiorrhiza]	molecular function: nucleic acid binding transcription factor activity (GO:0001071);; biological process: biological regulation (GO:0065007);; cellular component: cell (GO:0005623);; cellular component: organelle (GO:0043226);; cellular component: cell part (GO:0044464);; molecular function: binding (GO:0005488)	MAPK signaling pathway - plant (ko04016);; Plant-pathogen interaction (ko04626)	--
c45734.graph_c0	0	0	0	0	0	0	0	0	0	0	0	0	0	0	0	0	0	0	0	0	0	0	0	0	0	0	0	0	--	--	--	Signal transduction mechanisms	Glutathione S-transferase, C-terminal domain	--	Uncharacterized protein C6orf168 OS=Anthurium amnicola OX=1678845 GN=C6orf168 PE=3 SV=1	--	--	--	--	--
c74844.graph_c0	7.79	12.3	15.99	12.03	10.68	12.59	11.25	11.51	14.92	11.73	16.41	14.35	12.71	11.22	12.85	12.26	11.24	13.79	15.95	13.66	13.65	15.64	15.5	17.21	16.21	16.57	14.94	15.91	--	Molecular Function: protein binding (GO:0005515);;	K14962|1.7e-106|sind:105178149|K14962 COMPASS component SWD2 | (RefSeq) protein ANTHESIS POMOTING FACTOR 1 isoform X2	--	WD domain, G-beta repeat	Protein ANTHESIS POMOTING FACTOR 1 OS=Arabidopsis thaliana OX=3702 GN=APRF1 PE=2 SV=1	COMPASS component SWD2 OS=Salvia splendens OX=180675 GN=WDR82 PE=4 SV=1	--	COMPASS component SWD2 [Salvia splendens]	molecular function: binding (GO:0005488)	mRNA surveillance pathway (ko03015)	--
c80847.graph_c1	107.93	121.55	115.45	114.98	114.83	99.46	95.87	103.39	111.6	118.03	98.64	109.42	101.69	95.79	117.41	104.96	122.44	108.43	98.1	109.66	108.68	109.41	106.12	100.26	112.25	113.27	109.69	111.74	Amino acid transport and metabolism	Molecular Function: catalytic activity (GO:0003824);; Biological Process: transsulfuration (GO:0019346);; Molecular Function: pyridoxal phosphate binding (GO:0030170);;	K01739|4.1e-252|sind:105177271|K01739 cystathionine gamma-synthase [EC:2.5.1.48] | (RefSeq) LOW QUALITY PROTEIN: cystathionine gamma-synthase 1, chloroplastic	Amino acid transport and metabolism	Cys/Met metabolism PLP-dependent enzyme;; Aminotransferase class I and II	Cystathionine gamma-synthase 1, chloroplastic OS=Arabidopsis thaliana OX=3702 GN=CGS1 PE=1 SV=3	Cystathionine gamma-synthase OS=Salvia splendens OX=180675 GN=metB PE=3 SV=1	Amino acid transport and metabolism	cystathionine gamma-synthase [Salvia splendens]	molecular function: catalytic activity (GO:0003824);; biological process: metabolic process (GO:0008152);; biological process: cellular process (GO:0009987);; biological process: single-organism process (GO:0044699);; molecular function: binding (GO:0005488)	Cysteine and methionine metabolism (ko00270);; Selenocompound metabolism (ko00450);; Sulfur metabolism (ko00920);; Biosynthesis of amino acids (ko01230)	--
c67095.graph_c0	2.44	1.67	1.38	1.83	1.37	2.15	1.55	1.69	2.42	0.53	1.94	1.63	2.76	1.67	2.54	2.32	1.6	3.77	4.41	3.26	3.02	2.27	3.34	4.72	3.4	2.83	2.25	2.83	--	--	--	--	--	--	--	--	--	--	--	--
c36890.graph_c0	0	0	0	0	0	0	0	0	0	0	0	0	0	0	0	0	0	0	0	0	0	0	0	0	0	0	0	0	--	Molecular Function: ATP binding (GO:0005524);; Molecular Function: ATPase activity (GO:0016887);;	K03549|4.3e-06|qsu:111987200|K03549 KUP system potassium uptake protein | (RefSeq) LOW QUALITY PROTEIN: probable potassium transporter 17	General function prediction only	--	--	Uncharacterized protein OS=Salvia splendens OX=180675 GN=Saspl_038975 PE=4 SV=1	--	hypothetical protein Saspl_038975 [Salvia splendens]	molecular function: binding (GO:0005488);; molecular function: catalytic activity (GO:0003824)	--	--
c82367.graph_c0	14.68	16.38	17.23	16.1	15.87	16.81	18.28	16.99	18.27	15.48	16.09	16.61	18.43	17.67	18.53	18.21	22.02	26.03	23.82	23.96	27.97	29.5	27.48	24.96	29	29.16	26.03	28.06	--	Molecular Function: RNA binding (GO:0003723);;	K17579|4.0e-31|vcn:VOLCADRAFT_98760|K17579 protein phosphatase 1 regulatory subunit 42 | (RefSeq) hypothetical protein	Cell cycle control, cell division, chromosome partitioning	RNA recognition motif. (a.k.a. RRM, RBD, or RNP domain);; RNA recognition motif. (a.k.a. RRM, RBD, or RNP domain)	Protein MEI2-like 2 OS=Oryza sativa subsp. japonica OX=39947 GN=ML2 PE=2 SV=1	Uncharacterized protein OS=Salvia splendens OX=180675 GN=Saspl_001120 PE=4 SV=1	RNA processing and modification	hypothetical protein Saspl_001120 [Salvia splendens]	molecular function: binding (GO:0005488)	--	--
c85608.graph_c0	3.09	0.86	1.32	1.76	0.84	1.61	1.67	1.37	1.91	2.56	1.05	1.84	2.93	0.52	4.02	2.49	2.35	1.4	1.71	1.82	1.48	1.91	1.94	2.43	2.43	1.05	2.85	2.11	--	--	--	--	--	--	--	--	--	--	--	--
c76654.graph_c0	39.15	45.19	49.31	44.55	42.62	45.19	51.52	46.44	47.15	42.87	55.58	48.53	52.1	47.34	47.49	48.98	39.44	45.92	51.85	45.74	50.91	48.63	48.75	46.71	51.98	50.96	52	51.65	--	Molecular Function: ubiquitin-protein transferase activity (GO:0004842);; Molecular Function: metal ion binding (GO:0046872);;	K11968|7.6e-148|sind:105161204|K11968 ariadne-1 [EC:2.3.2.31] | (RefSeq) probable E3 ubiquitin-protein ligase ARI8	Posttranslational modification, protein turnover, chaperones	IBR domain, a half RING-finger domain	Probable E3 ubiquitin-protein ligase ARI8 OS=Arabidopsis thaliana OX=3702 GN=ARI8 PE=2 SV=1	RanBP-type and C3HC4-type zinc finger-containing protein 1 OS=Salvia splendens OX=180675 GN=ARIH1 PE=3 SV=1	Posttranslational modification, protein turnover, chaperones	ariadne-1 [Salvia splendens]	molecular function: catalytic activity (GO:0003824);; biological process: metabolic process (GO:0008152);; biological process: cellular process (GO:0009987);; molecular function: binding (GO:0005488)	--	--
c77677.graph_c0	71.5	77.61	68.53	72.55	68.98	78.55	87.79	78.44	88.75	71.44	96.73	85.64	95.96	91.12	96.75	94.61	76.07	88.01	87.16	83.75	86.9	95.78	93.01	96.36	95.59	81.64	94.71	90.65	--	Cellular Component: nucleus (GO:0005634);; Biological Process: regulation of transcription, DNA-templated (GO:0006355);; Molecular Function: sequence-specific DNA binding (GO:0043565);;	K09338|3.2e-38|nnu:104596681|K09338 homeobox-leucine zipper protein | (RefSeq) homeobox-leucine zipper protein HAT5-like	Transcription	Homeodomain;; Homeobox associated leucine zipper;; Homeobox KN domain	Homeobox-leucine zipper protein ATHB-13 OS=Arabidopsis thaliana OX=3702 GN=ATHB-13 PE=2 SV=2	Homeobox-leucine zipper protein OS=Salvia splendens OX=180675 GN=HD-ZIP PE=4 SV=1	Transcription	homeobox-leucine zipper protein [Salvia splendens]	cellular component: cell (GO:0005623);; cellular component: organelle (GO:0043226);; cellular component: cell part (GO:0044464);; biological process: biological regulation (GO:0065007);; molecular function: binding (GO:0005488)	--	--
c108995.graph_c0	0	0	0	0	0	0	0	0	0	0	0	0	0	0	0	0	0	0	0	0	0	0	0	0	0	0	0	0	--	Molecular Function: RNA-directed DNA polymerase activity (GO:0003964);; Cellular Component: integral component of membrane (GO:0016021);;	K03023|1.4e-11|qsu:112001605|K03023 DNA-directed RNA polymerase III subunit RPC3 | (RefSeq) uncharacterized protein LOC112001605	General function prediction only	Reverse transcriptase (RNA-dependent DNA polymerase)	--	Putative RNA-directed DNA polymerase OS=Medicago truncatula OX=3880 GN=MtrunA17_Chr8g0341191 PE=4 SV=1	Secondary metabolites biosynthesis, transport and catabolism	putative RNA-directed DNA polymerase [Medicago truncatula]	molecular function: catalytic activity (GO:0003824);; biological process: metabolic process (GO:0008152);; biological process: cellular process (GO:0009987);; cellular component: membrane (GO:0016020);; cellular component: membrane part (GO:0044425)	RNA polymerase (ko03020)	--
c108542.graph_c0	0	0	0	0	3.61	0	0	1.2	0	0	0	0	0	0	0	0	0	0	0	0	0	0	0	0	0	0	0	0	--	--	--	--	GRIM-19 protein	--	--	--	--	--	--	--
c58739.graph_c0	1.68	0	0	0.56	0	0	1.56	0.52	0	0	0	0	0	0	0	0	0.38	0	0.85	0.41	0	0	0	0	0	0	0	0	--	--	--	--	--	--	--	--	--	--	--	--
c83250.graph_c0	5.13	5	4.47	4.87	5.02	5.63	4.32	4.99	3.7	4.09	4.5	4.1	4.45	4.15	5.57	4.72	5.44	5.31	6.61	5.79	6.2	5.01	5.28	4.62	6.04	4.23	4.33	4.87	Cell wall/membrane/envelope biogenesis	Cellular Component: plasma membrane (GO:0005886);; Biological Process: lipid A biosynthetic process (GO:0009245);; Molecular Function: transferase activity (GO:0016740);;	K02527|2.1e-135|sind:105174134|K02527 3-deoxy-D-manno-octulosonic-acid transferase [EC:2.4.99.12 2.4.99.13 2.4.99.14 2.4.99.15] | (RefSeq) probable 3-deoxy-D-manno-octulosonic acid transferase, mitochondrial isoform X1	--	3-Deoxy-D-manno-octulosonic-acid transferase (kdotransferase)	Probable 3-deoxy-D-manno-octulosonic acid transferase, mitochondrial OS=Arabidopsis thaliana OX=3702 GN=KDTA PE=2 SV=1	Glycos_transf_N domain-containing protein OS=Erythranthe guttata OX=4155 GN=MIMGU_mgv1a006467mg PE=4 SV=1	Cell wall/membrane/envelope biogenesis	probable 3-deoxy-D-manno-octulosonic acid transferase, mitochondrial isoform X3 [Sesamum indicum]	cellular component: cell (GO:0005623);; cellular component: membrane (GO:0016020);; cellular component: cell part (GO:0044464);; biological process: metabolic process (GO:0008152);; biological process: cellular process (GO:0009987);; biological process: single-organism process (GO:0044699);; molecular function: catalytic activity (GO:0003824)	--	LOC105174134
c89610.graph_c0	0.42	0	0.79	0.4	0	0	0	0	0.35	0	0	0.12	0	1.63	0	0.54	0	0	0	0	0.8	0.75	0.52	0	0	0.41	0.39	0.27	--	--	--	--	--	--	--	--	--	--	--	--
c13745.graph_c0	0	0	0	0	0	0	0	0	0	0	0.49	0.16	0	0	0	0	0	0	1.2	0.4	0	0	0	0	0	0	0	0	--	--	--	--	Dyggve-Melchior-Clausen syndrome protein	--	--	--	--	--	--	--
c32164.graph_c0	0	0.62	0.77	0.46	0.52	0.46	0.54	0.51	0.19	1.51	0.68	0.79	0.73	2.07	0.19	1	0.65	1.87	1.41	1.31	0.64	0.72	0.83	1.12	0	0	0	0	--	--	--	--	--	--	--	--	--	--	--	--
c35632.graph_c0	0.86	0	0	0.29	0	0	0	0	0	0	0.78	0.26	0	0	0.72	0.24	0.56	0	0	0.19	0	0	0	0	0	1.74	0	0.58	--	--	--	--	--	--	--	--	--	--	--	--
c67061.graph_c0	1.23	1.23	0.32	0.93	0.23	0.89	0.92	0.68	1.71	0.73	0.62	1.02	0.76	2.25	0.43	1.15	0.25	0.71	0.87	0.61	1.9	1.06	1.58	1.79	1.1	0.08	1.23	0.8	--	--	--	--	--	--	--	--	--	--	--	--
c81417.graph_c1	13.83	15.28	12.47	13.86	13.12	11.87	15.21	13.4	16.61	15.93	19.89	17.48	15.32	11.72	15.78	14.27	11.89	10.65	11.89	11.48	14.54	9.91	13.45	15.89	13.31	10.54	15.29	13.05	--	--	--	--	--	--	--	--	--	--	--	--
c7314.graph_c0	0	0	0	0	0	0	0	0	0	1.35	0	0.45	0	0	0	0	0	0	0	0	0	0	0	0	0	0	0	0	--	--	--	--	Protein of unknown function (DUF677)	UPF0496 protein At4g34320 OS=Arabidopsis thaliana OX=3702 GN=At4g34320 PE=2 SV=1	UPF0496 protein 1 OS=Hibiscus syriacus OX=106335 GN=F3Y22_tig00008289pilonHSYRG00036 PE=3 SV=1	Function unknown	UPF0496 protein At4g34320 [Sesamum indicum]	--	--	LOC105169611
c5711.graph_c0	0.15	0	0.28	0.14	0.79	0.43	0.14	0.45	0	0	0.28	0.09	0.26	0	0	0.09	0.21	0	0.35	0.19	0.69	0.26	0.36	0.14	0.25	0	0.13	0.13	--	Cellular Component: nucleus (GO:0005634);; Biological Process: negative regulation of transcription, DNA-templated (GO:0045892);;	--	--	Transcriptional repressor, ovate	--	Transcription repressor OS=Salvia splendens OX=180675 GN=Saspl_026190 PE=4 SV=1	Function unknown	hypothetical protein Saspl_026190 [Salvia splendens]	cellular component: cell (GO:0005623);; cellular component: organelle (GO:0043226);; cellular component: cell part (GO:0044464);; biological process: biological regulation (GO:0065007)	--	--
c89818.graph_c0	0	0	0.45	0.15	0	0	0.88	0.29	0	0	0	0	0.42	0.93	0	0.45	0	1.15	0	0.38	0	0.84	0.28	0	0.84	0.94	0	0.59	--	Molecular Function: UDP-glycosyltransferase activity (GO:0008194);;	K13493|1.1e-17|ath:AT5G05870|K13493 cytokinin-N-glucosyltransferase [EC:2.4.1.-] | (RefSeq) UGT76C1; UDP-glucosyl transferase 76C1	--	UDP-glucoronosyl and UDP-glucosyl transferase	UDP-glucose iridoid glucosyltransferase OS=Catharanthus roseus OX=4058 GN=UGT76A2 PE=1 SV=1	Glycosyltransferase OS=Salvia splendens OX=180675 GN=Saspl_029905 PE=3 SV=1	--	hypothetical protein Saspl_029905 [Salvia splendens]	molecular function: catalytic activity (GO:0003824)	Zeatin biosynthesis (ko00908)	--
c3600.graph_c0	0	0	0	0	0	0	0	0	0.21	0.64	0	0.28	0	1.18	0.44	0.54	0	0	0	0	0	0	0	0	0	0	0	0	--	--	--	Function unknown	--	--	--	--	--	--	--	--
c18568.graph_c0	0	0.25	0	0.08	0.24	0.29	0.25	0.26	0.45	0	0	0.15	0	0	0.23	0.08	0.19	0.22	0.63	0.35	0	0	0.09	0.26	0	0.53	0.5	0.34	--	--	--	--	--	--	--	--	--	--	--	--
c100069.graph_c0	0	0	0	0	0	0	0.24	0.08	0	0	0	0	0	0	0	0	0	0.84	0	0.28	0	0	0	0	0.23	0	0	0.08	--	Cellular Component: cellular_component (GO:0005575);; Cellular Component: cell wall (GO:0005618);; Cellular Component: obsolete cell (GO:0005623);; Cellular Component: plasma membrane (GO:0005886);; Biological Process: multicellular organism development (GO:0007275);; Biological Process: biological_process (GO:0008150);; Cellular Component: membrane (GO:0016020);; Biological Process: root system …	--	--	Fasciclin domain	Fasciclin-like arabinogalactan protein 1 OS=Arabidopsis thaliana OX=3702 GN=FLA1 PE=1 SV=1	Fasciclin-like arabinogalactan protein OS=Actinidia chinensis var. chinensis OX=1590841 GN=CEY00_Acc19327 PE=3 SV=1	Function unknown	hypothetical protein HYC85_014811 [Camellia sinensis]	cellular component: cell (GO:0005623);; cellular component: cell part (GO:0044464);; cellular component: membrane (GO:0016020);; biological process: multicellular organismal process (GO:0032501);; biological process: developmental process (GO:0032502);; biological process: single-organism process (GO:0044699);; cellular component: membrane part (GO:0044425)	--	--
c32280.graph_c0	0	0	0	0	0	0	0	0	0.66	0	0.74	0.47	0	1.51	0	0.5	0	0	0	0	0	0	0	0	0	0	0	0	--	--	--	--	--	--	--	--	--	--	--	--
c109258.graph_c0	0	0	0	0	0	0	0	0	0	0	0	0	0	0	0	0	0	0	0	0	0	0	0	0	0	0	0	0	--	--	--	--	--	--	--	--	--	--	--	--
c74944.graph_c1	0.64	0.63	1.14	0.8	1	1.56	1.96	1.51	1.46	0.71	0.81	0.99	1.56	0.92	1.34	1.27	1.75	0.99	1.98	1.57	1.2	1.07	1.19	1.31	1.72	1.39	0.96	1.36	--	Molecular Function: protein dimerization activity (GO:0046983);;	K12126|1.7e-24|ppp:112275291|K12126 phytochrome-interacting factor 3 | (RefSeq) uncharacterized protein LOC112275291 isoform X1	--	--	Transcription factor SPATULA OS=Arabidopsis thaliana OX=3702 GN=SPT PE=1 SV=1	BHLH domain-containing protein OS=Handroanthus impetiginosus OX=429701 GN=CDL12_09404 PE=4 SV=1	Transcription	hypothetical protein CDL12_09404 [Handroanthus impetiginosus]	molecular function: binding (GO:0005488)	Plant hormone signal transduction (ko04075);; Circadian rhythm - plant (ko04712)	--
c33434.graph_c0	0	0	0	0	0	0	0	0	0.17	0	0.59	0.25	0	0	0	0	0	1.16	0	0.39	0	0	0.07	0.2	0	0.39	0	0.13	Energy production and conversion	Molecular Function: fumarate hydratase activity (GO:0004333);; Biological Process: tricarboxylic acid cycle (GO:0006099);; Biological Process: fumarate metabolic process (GO:0006106);; Cellular Component: tricarboxylic acid cycle enzyme complex (GO:0045239);;	K01679|1.5e-64|csl:COCSUDRAFT_12444|K01679 fumarate hydratase, class II [EC:4.2.1.2] | (RefSeq) fumarate hydratase	Energy production and conversion	Lyase	Fumarate hydratase 1, mitochondrial OS=Arabidopsis thaliana OX=3702 GN=FUM1 PE=1 SV=2	Fumarate hydratase OS=Coccomyxa subellipsoidea (strain C-169) OX=574566 GN=COCSUDRAFT_12444 PE=3 SV=1	Energy production and conversion	fumarate hydratase, mitochondrial-like [Rhodamnia argentea]	molecular function: catalytic activity (GO:0003824);; biological process: metabolic process (GO:0008152);; biological process: cellular process (GO:0009987);; biological process: single-organism process (GO:0044699);; cellular component: cell (GO:0005623);; cellular component: macromolecular complex (GO:0032991);; cellular component: cell part (GO:0044464)	Citrate cycle (TCA cycle) (ko00020);; Pyruvate metabolism (ko00620);; Carbon metabolism (ko01200)	--
c109434.graph_c0	0	0	0	0	0	0	0	0	0	0	0	0	0	0	0	0	0	2.98	0	0.99	0	0	0	0	0	0	0	0	--	Molecular Function: catalytic activity (GO:0003824);;	--	--	--	--	Uncharacterized protein ycf23 OS=Camellia sinensis var. sinensis OX=542762 GN=TEA_014223 PE=3 SV=1	Function unknown	hypothetical protein HYC85_018866 [Camellia sinensis]	molecular function: catalytic activity (GO:0003824)	--	--
c53869.graph_c0	0	0	0	0	0	0	0	0	0.71	0	0	0.24	0	0	0	0	0	0	0	0	0	0	0	0	0	0	0.76	0.25	--	--	--	--	--	--	--	--	--	--	--	--
c76539.graph_c2	0	0	0	0	0	0	1.87	0.62	0	0	0	0	0	0	0	0	0	0	0	0	0	0	0	0	0	0	0	0	--	--	K06889|5.6e-08|dzi:111284773|K06889 uncharacterized protein | (RefSeq) uncharacterized protein LOC111284773	Lipid transport and metabolism	--	--	Hydrolase_4 domain-containing protein OS=Salvia splendens OX=180675 GN=Saspl_038905 PE=4 SV=1	Lipid transport and metabolism	hypothetical protein Saspl_038905 [Salvia splendens]	--	--	--
c70094.graph_c1	12.59	9.45	12.08	11.37	10.57	11.48	12.75	11.6	14.9	9.61	12.12	12.21	13.54	10.54	14.55	12.88	11.37	12.39	14.18	12.65	13.08	9.5	12	13.41	13.41	14.2	14.23	13.95	--	Biological Process: DNA integration (GO:0015074);;	K03006|1.8e-201|adu:107466525|K03006 DNA-directed RNA polymerase II subunit RPB1 [EC:2.7.7.6] | (RefSeq) LOW QUALITY PROTEIN: DNA-directed RNA polymerase II subunit 1-like	General function prediction only	Reverse transcriptase (RNA-dependent DNA polymerase);; Integrase core domain;; GAG-pre-integrase domain;; gag-polypeptide of LTR copia-type;; Retrotransposon gag protein	Retrovirus-related Pol polyprotein from transposon TNT 1-94 OS=Nicotiana tabacum OX=4097 PE=2 SV=1	Uncharacterized protein OS=Microthlaspi erraticum OX=1685480 GN=MERR_LOCUS13611 PE=4 SV=1	Replication, recombination and repair	unnamed protein product [Microthlaspi erraticum]	biological process: metabolic process (GO:0008152);; biological process: cellular process (GO:0009987)	RNA polymerase (ko03020)	--
c106339.graph_c0	0	0	0	0	0	0	0	0	0	0	0	0	0	0	0	0	0	0	0	0	0	0	0	0	0	0	0	0	--	--	--	--	--	--	--	--	--	--	--	--
c106464.graph_c0	0	0	0	0	0	0	0	0	0	1.92	0	0.64	0	0	0	0	0	0	0	0	0	0	0	0	0	0	0	0	--	--	--	--	--	--	--	--	--	--	--	--
c54109.graph_c0	0	0	2.18	0.73	0	0	0.54	0.18	0	1.92	0	0.64	0	2.31	0.49	0.93	0.39	0	0.88	0.42	0	0	0	0	1.03	1.15	1.05	1.08	--	--	--	--	--	--	--	--	--	--	--	--
c28974.graph_c1	4.31	0	2.05	2.12	0	1.43	0	0.48	0	0	0	0	0	0	0	0	0	0	0	0	0	1.93	0.64	0	2.89	1.11	0	1.33	--	--	--	--	--	--	--	--	--	--	--	--
c38884.graph_c0	0	0	0	0	0	0	0	0	0	4.07	0	1.36	0	0	0	0	0	0	0	0	0	0	0	0	0	0	0	0	--	Molecular Function: motor activity (GO:0003774);; Cellular Component: cytoplasm (GO:0005737);; Cellular Component: microtubule (GO:0005874);; Biological Process: microtubule-based process (GO:0007017);; Cellular Component: dynein complex (GO:0030286);;	K10418|2.4e-10|cic:CICLE_v10007063mg|K10418 dynein light chain LC8-type | (RefSeq) hypothetical protein	Cytoskeleton	--	--	Dynein light chain OS=Citrus clementina OX=85681 GN=CICLE_v10007063mg PE=3 SV=1	Cytoskeleton	dynein light chain 2, cytoplasmic [Citrus clementina]	molecular function: catalytic activity (GO:0003824);; cellular component: cell (GO:0005623);; cellular component: cell part (GO:0044464);; cellular component: organelle (GO:0043226);; cellular component: organelle part (GO:0044422);; cellular component: supramolecular complex (GO:0099080);; biological process: cellular process (GO:0009987);; cellular component: macromolecular complex (GO:0032991)	--	LOC18032852
c105838.graph_c0	0	3.31	0	1.1	0	0	0	0	0	0	0	0	0	0	0	0	0	0	0	0	0	0	0	0	0	0	0	0	--	--	--	--	--	--	--	--	--	--	--	--
c31779.graph_c0	0	0	0	0	0	0	0.51	0.17	0	0	0	0	0	0	0.93	0.31	0	0	0.42	0.14	1.68	0	0.56	0	0	0.55	0	0.18	--	--	--	--	--	--	--	--	--	--	--	--
c113563.graph_c0	0	0	0	0	0	0	2.43	0.81	0	0	0	0	0	0	0	0	0	0	0	0	0	0	0	0	0	0	0	0	--	--	--	--	--	--	--	--	--	--	--	--
c77170.graph_c0	8.82	6.99	11.47	9.09	10.16	7.63	8.22	8.67	8.3	8.61	8.26	8.39	9.88	7.11	12.46	9.82	10.47	10.63	11.46	10.85	11.22	12.68	10.51	7.62	10.11	14.54	10.58	11.74	--	Cellular Component: integral component of membrane (GO:0016021);;	K22145|3.8e-72|sind:105159524|K22145 transmembrane protein 18 | (RefSeq) transmembrane protein 18	General function prediction only	Transmembrane protein 18	--	Transmembrane protein 18 OS=Salvia splendens OX=180675 GN=Saspl_002699 PE=3 SV=1	Function unknown	hypothetical protein Saspl_002699 [Salvia splendens]	cellular component: membrane (GO:0016020);; cellular component: membrane part (GO:0044425)	--	--
c92554.graph_c0	0	0	0	0	0	0	0	0	0	0	0	0	0	0	8.17	2.72	0	0	0	0	0	0	0	0	0	0	0	0	--	--	--	General function prediction only	Reverse transcriptase (RNA-dependent DNA polymerase)	--	Reverse transcriptase domain-containing protein (Fragment) OS=Mucuna pruriens OX=157652 GN=CR513_49018 PE=4 SV=1	Replication, recombination and repair	hypothetical protein CR513_49018, partial [Mucuna pruriens]	--	--	--
c75113.graph_c1	399.69	439.56	375.64	404.96	415.12	377.21	378.96	390.43	429.73	398.24	386.92	404.96	413.97	362	494.25	423.41	414.04	433.14	353.15	400.11	441.39	370.54	439.57	506.78	431.77	411.73	430.68	424.73	--	--	--	--	--	--	--	--	--	--	--	--
c69933.graph_c0	1.02	0.35	1.58	0.98	1.62	0.99	1.32	1.31	0.21	1.38	0.62	0.74	0.12	0.92	0.33	0.46	0.38	0.42	2.11	0.97	0.49	0.57	0.64	0.87	0.46	0.37	0.47	0.43	--	--	--	--	--	--	Uncharacterized protein OS=Salvia splendens OX=180675 GN=Saspl_025046 PE=4 SV=1	--	hypothetical protein Saspl_025046 [Salvia splendens]	--	--	--
c71649.graph_c0	26.32	28.66	31.87	28.95	32.15	28.42	26.1	28.89	29.12	25.16	24.55	26.28	34.09	26.14	23.88	28.04	18.79	18.64	21.45	19.63	24.27	18.52	21.74	22.42	19.1	14.9	18.17	17.39	Carbohydrate transport and metabolism	Molecular Function: hydrolase activity, hydrolyzing O-glycosyl compounds (GO:0004553);; Biological Process: carbohydrate metabolic process (GO:0005975);; Biological Process: actin filament organization (GO:0007015);; Molecular Function: actin filament binding (GO:0051015);;	K01210|9.0e-31|qsu:112019139|K01210 glucan 1,3-beta-glucosidase [EC:3.2.1.58] | (RefSeq) glucan 1,3-beta-glucosidase-like	--	Cellulase (glycosyl hydrolase family 5);; Beta-galactosidase	--	Mannan endo-1,4-beta-mannosidase OS=Salvia splendens OX=180675 GN=Saspl_020161 PE=3 SV=1	Carbohydrate transport and metabolism	hypothetical protein Saspl_020161 [Salvia splendens]	molecular function: catalytic activity (GO:0003824);; biological process: metabolic process (GO:0008152);; biological process: cellular process (GO:0009987);; biological process: single-organism process (GO:0044699);; biological process: cellular component organization or biogenesis (GO:0071840);; molecular function: binding (GO:0005488)	Starch and sucrose metabolism (ko00500)	--
c86772.graph_c0	0	0	0	0	0.89	0	0.46	0.45	0	0.82	0	0.27	0.44	0.48	0.42	0.45	0	0.4	0.75	0.38	0	0.87	0.29	0	0.44	0	0	0.15	--	--	--	--	--	--	--	--	--	--	--	--
c75435.graph_c0	64.75	65.12	60.19	63.35	63.02	65.22	77.39	68.54	66.19	56.92	73.37	65.49	88.55	78.66	65.97	77.73	45.73	51.9	33.47	43.7	47.1	43.53	48.06	53.56	52.75	62.36	54.15	56.42	--	Molecular Function: monooxygenase activity (GO:0004497);; Molecular Function: iron ion binding (GO:0005506);; Molecular Function: oxidoreductase activity, acting on paired donors, with incorporation or reduction of molecular oxygen (GO:0016705);; Molecular Function: heme binding (GO:0020037);;	K15405|4.9e-124|boe:106319060|K15405 midchain alkane hydroxylase | (RefSeq) alkane hydroxylase MAH1-like	--	Cytochrome P450	Alkane hydroxylase MAH1 OS=Arabidopsis thaliana OX=3702 GN=CYP96A15 PE=2 SV=1	Fatty acid omega-hydroxylase OS=Salvia splendens OX=180675 GN=CYP86A4S PE=3 SV=1	Secondary metabolites biosynthesis, transport and catabolism	fatty acid omega-hydroxylase [Salvia splendens]	molecular function: catalytic activity (GO:0003824);; biological process: metabolic process (GO:0008152);; biological process: single-organism process (GO:0044699);; molecular function: binding (GO:0005488)	Cutin, suberine and wax biosynthesis (ko00073)	--
c89646.graph_c0	0	0	0	0	0	0	0	0	0	0	0	0	0	0	0	0	0	0	0.61	0.2	0	0	0	0	0	0	0	0	--	--	--	--	--	--	--	--	--	--	--	--
c1509.graph_c0	0	0	0	0	0	0	0	0	0	0	0	0	0	0	0	0	0	1.38	0	0.46	0	0	0	0	0	0	0	0	Translation, ribosomal structure and biogenesis	Molecular Function: translation release factor activity (GO:0003747);;	K03265|9.1e-31|psom:113287755|K03265 peptide chain release factor subunit 1 | (RefSeq) eukaryotic peptide chain release factor subunit 1-3-like	Translation, ribosomal structure and biogenesis	eRF1 domain 3	Eukaryotic peptide chain release factor subunit 1-2 OS=Brassica oleracea var. botrytis OX=3715 GN=ERF1-2 PE=1 SV=1	eRF1_1 domain-containing protein OS=Tetradesmus obliquus OX=3088 GN=BQ4739_LOCUS5820 PE=3 SV=1	Translation, ribosomal structure and biogenesis	eukaryotic peptide chain release factor subunit 1-like [Rhodamnia argentea]	molecular function: binding (GO:0005488);; biological process: metabolic process (GO:0008152);; biological process: cellular process (GO:0009987);; biological process: single-organism process (GO:0044699);; biological process: cellular component organization or biogenesis (GO:0071840)	mRNA surveillance pathway (ko03015)	LOC115745090
c8803.graph_c0	0	0	0	0	0	0	0	0	0	0	0	0	0	0	0	0	0	0	0	0	0	0	0	0	0	0	0	0	--	--	--	--	--	--	--	--	--	--	--	--
c105658.graph_c0	0	0	0	0	0	0	0	0	0	0	0	0	0	0	0	0	0	5.09	0	1.7	0	0	0	0	0	0	0	0	--	Molecular Function: zinc ion binding (GO:0008270);;	K23541|1.1e-07|ats:109742580|K23541 Ca2+/H+ antiporter, TMEM165/GDT1 family | (RefSeq) LOC109742580; pentatricopeptide repeat-containing protein At5g04780-like	General function prediction only	--	Pentatricopeptide repeat-containing protein At3g47530 OS=Arabidopsis thaliana OX=3702 GN=PCMP-H76 PE=2 SV=1	DYW_deaminase domain-containing protein OS=Camellia sinensis var. sinensis OX=542762 GN=TEA_024654 PE=3 SV=1	Function unknown	hypothetical protein TEA_024654 [Camellia sinensis var. sinensis]	molecular function: binding (GO:0005488)	--	--
c78034.graph_c3	8.04	10.28	11.3	9.87	8.78	9.34	6.11	8.08	10.38	12.67	11.42	11.49	11	22.37	12.56	15.31	5.64	7.03	10.24	7.64	10.73	14.88	12.4	11.59	7.49	10.33	8.73	8.85	Lipid transport and metabolism	--	K18368|4.2e-151|sind:105156377|K18368 caffeoylshikimate esterase [EC:3.1.1.-] | (RefSeq) caffeoylshikimate esterase	Lipid transport and metabolism	Serine aminopeptidase, S33;; alpha/beta hydrolase fold;; Prolyl oligopeptidase family;; Putative esterase;; Phospholipase/Carboxylesterase	Caffeoylshikimate esterase OS=Arabidopsis thaliana OX=3702 GN=CSE PE=1 SV=1	Hydrolase_4 domain-containing protein OS=Salvia splendens OX=180675 GN=Saspl_011985 PE=4 SV=1	Lipid transport and metabolism	hypothetical protein Saspl_011985 [Salvia splendens]	--	Phenylpropanoid biosynthesis (ko00940)	--
c86852.graph_c0	0.41	0.38	0.26	0.35	0.25	0.67	0.13	0.35	0.56	0	0.26	0.27	0.12	0.12	0	0.08	0.1	0.34	0.11	0.18	0.26	0.24	0.17	0	0.36	0.53	0.88	0.59	--	--	--	--	--	--	--	--	--	--	--	--
c114149.graph_c0	0	0	0	0	0	0	0	0	0	0.64	0	0.21	0	0	0	0	0	0	0	0	0	0	0	0	0	0	2.13	0.71	--	--	--	--	--	--	--	--	--	--	--	--
c85860.graph_c1	4.36	3.02	10.58	5.99	4.51	6.09	2.79	4.46	7.28	3.77	1.96	4.34	3.28	2.16	2.78	2.74	4.83	4.16	20.61	9.87	6.58	8.21	6.62	5.06	6.29	2.98	2.89	4.05	--	Biological Process: regulation of monopolar cell growth (GO:0051513);;	--	--	Domain of unknown function (DUF4378);; DUF761-associated sequence motif	Protein LONGIFOLIA 1 OS=Arabidopsis thaliana OX=3702 GN=LNG1 PE=1 SV=1	Uncharacterized protein OS=Salvia splendens OX=180675 GN=Saspl_007796 PE=4 SV=1	Function unknown	hypothetical protein Saspl_007796 [Salvia splendens]	biological process: biological regulation (GO:0065007)	--	--
c57796.graph_c0	0	3.36	1.71	1.69	0	0	0	0	0	0	0	0	0	0	0	0	1.09	1.4	0	0.83	0	0	0	0	0	0	0	0	--	Molecular Function: molecular_function (GO:0003674);; Molecular Function: nucleic acid binding (GO:0003676);; Molecular Function: RNA binding (GO:0003723);; Molecular Function: catalytic activity (GO:0003824);; Molecular Function: nuclease activity (GO:0004518);; Molecular Function: endonuclease activity (GO:0004519);; Molecular Function: binding (GO:0005488);; Cellular Component: cellular_compon…	K17964|2.9e-10|cann:107868197|K17964 leucine-rich PPR motif-containing protein, mitochondrial | (RefSeq) pentatricopeptide repeat-containing protein At5g55840	--	PPR repeat family;; PPR repeat;; PPR repeat	--	Pentatricopeptide repeat protein OS=Salvia miltiorrhiza OX=226208 PE=2 SV=1	Function unknown	pentatricopeptide repeat protein [Salvia miltiorrhiza]	molecular function: binding (GO:0005488);; molecular function: catalytic activity (GO:0003824);; biological process: metabolic process (GO:0008152);; biological process: cellular process (GO:0009987);; cellular component: cell (GO:0005623);; cellular component: cell part (GO:0044464);; cellular component: organelle (GO:0043226)	--	--
c106711.graph_c0	0	0	0	0	0.77	0	0	0.26	0	0	0	0	0	0	0	0	0	0	0	0	0	0	0	0	0	0	0	0	--	--	--	--	--	--	--	--	--	--	--	--
c77446.graph_c0	26.71	26.75	33.39	28.95	31.63	21.09	26.34	26.35	32.64	27.28	30.4	30.11	32.4	32.22	27.38	30.67	40.76	33.15	39.43	37.78	39.74	36.4	38.12	38.23	42.36	34.85	40.13	39.11	--	--	--	--	--	--	Uncharacterized protein OS=Salvia splendens OX=180675 GN=Saspl_015726 PE=4 SV=1	--	hypothetical protein Saspl_015726 [Salvia splendens]	--	--	--
c81055.graph_c0	3.62	4.18	6.51	4.77	4.7	3.98	2.34	3.67	3.08	2.38	0.68	2.05	5.4	2.32	4.72	4.15	4.61	2.84	13.97	7.14	12.19	9.07	9.36	6.82	8.86	2.34	6.14	5.78	--	--	--	--	C1 domain;; Phorbol esters/diacylglycerol binding domain (C1 domain)	--	Uncharacterized protein OS=Handroanthus impetiginosus OX=429701 GN=CDL12_16550 PE=4 SV=1	Function unknown	hypothetical protein CDL12_16550 [Handroanthus impetiginosus]	--	--	--
c41596.graph_c0	0	0	0	0	0.6	0	0.62	0.41	0.28	0	0.63	0.3	1.2	0	0	0.4	0	0	0.26	0.09	0	0	0	0	0.29	0	0	0.1	--	--	--	--	--	--	--	--	--	--	--	--
c42195.graph_c0	0.49	0.45	0	0.31	0	0	1.36	0.45	0	0	0	0	0.43	0	0	0.14	0	0	0	0	0.46	0	0.77	1.84	0	0	0	0	--	--	--	--	--	--	Uncharacterized protein OS=Carpinus fangiana OX=176857 GN=FH972_027358 PE=4 SV=1	--	hypothetical protein FH972_027358 [Carpinus fangiana]	--	--	--
c48121.graph_c0	0	0	0	0	0	0	0	0	0	0	0	0	0	0	0	0	0	0	0	0	0	0	0	0	0	0	0	0	--	--	--	--	--	--	--	--	--	--	--	--
c108446.graph_c0	0	0	0	0	0	0	0	0	0	0	0	0	0	0	0	0	0	0	0	0	0	0	0	0	2.39	0	0	0.8	--	Molecular Function: acyl-CoA ligase activity (GO:0003996);; Molecular Function: long-chain fatty acid-CoA ligase activity (GO:0004467);; Cellular Component: integral component of membrane (GO:0016021);; Molecular Function: decanoate-CoA ligase activity (GO:0102391);;	K01897|3.8e-23|sind:105167408|K01897 long-chain acyl-CoA synthetase [EC:6.2.1.3] | (RefSeq) long chain acyl-CoA synthetase 8	Lipid transport and metabolism	--	Long chain acyl-CoA synthetase 8 OS=Arabidopsis thaliana OX=3702 GN=LACS8 PE=1 SV=1	4-coumarate--CoA ligase OS=Camellia oleifera OX=385388 GN=LACS2 PE=2 SV=1	Lipid transport and metabolism	hypothetical protein HYC85_001860 [Camellia sinensis]	molecular function: catalytic activity (GO:0003824);; biological process: metabolic process (GO:0008152);; biological process: cellular process (GO:0009987);; biological process: single-organism process (GO:0044699);; cellular component: membrane (GO:0016020);; cellular component: membrane part (GO:0044425)	Fatty acid biosynthesis (ko00061);; Fatty acid degradation (ko00071);; Fatty acid metabolism (ko01212);; Peroxisome (ko04146)	--
c86330.graph_c0	1.24	1.18	2.38	1.6	0	0	3.45	1.15	4.29	2.03	0	2.11	0	1.4	3.1	1.5	0.79	3.97	6.44	3.73	4.61	4.45	4.17	3.44	0	1.29	4.53	1.94	--	Molecular Function: DNA binding (GO:0003677);; Cellular Component: nucleus (GO:0005634);; Biological Process: regulation of transcription, DNA-templated (GO:0006355);;	--	--	--	--	Homeobox domain-containing protein OS=Salvia splendens OX=180675 GN=Saspl_031741 PE=3 SV=1	--	BEL1-like homeodomain protein 4 [Sesamum indicum]	molecular function: binding (GO:0005488);; cellular component: cell (GO:0005623);; cellular component: organelle (GO:0043226);; cellular component: cell part (GO:0044464);; biological process: biological regulation (GO:0065007)	--	LOC105159201
c99106.graph_c0	0	0	0	0	0.36	0	0	0.12	0	0	1.11	0.37	0	0.76	0	0.25	0.27	0	0	0.09	0	0	0.12	0.37	0	0	0	0	--	--	--	--	--	--	--	--	--	--	--	--
c113106.graph_c0	0	0	0	0	0	0	3.93	1.31	0	0	0	0	0	0	0	0	0	0	0	0	0	0	0	0	0	0	0	0	--	--	--	--	--	--	--	--	--	--	--	--
c37961.graph_c0	0	0	0	0	0	0	0	0	0	0	0	0	0	0	0	0	0.27	1.24	0.89	0.8	0	0	0	0	0	0	0	0	--	Molecular Function: protein kinase activity (GO:0004672);; Molecular Function: ATP binding (GO:0005524);;	K18669|3.0e-32|mpp:MICPUCDRAFT_1886|K18669 dual specificity tyrosine-phosphorylation-regulated kinase 2/3/4 [EC:2.7.12.1] | (RefSeq) hypothetical protein	General function prediction only	Protein kinase domain;; Protein tyrosine and serine/threonine kinase	--	Dual-specificity kinase OS=Chloropicon primus OX=1764295 GN=A3770_04p30050 PE=3 SV=1	Signal transduction mechanisms	hypothetical protein K493DRAFT_302966 [Basidiobolus meristosporus CBS 931.73]	molecular function: catalytic activity (GO:0003824);; biological process: metabolic process (GO:0008152);; biological process: cellular process (GO:0009987);; molecular function: binding (GO:0005488)	--	--
c32453.graph_c0	0	0	0	0	0	0	0	0	0	0	0	0	0	0	0	0	0	0	0	0	0	0	0	0	0	0	0	0	--	--	--	--	--	--	--	--	--	--	--	--
c69225.graph_c0	0.67	0	0.42	0.36	0.55	0.19	0.45	0.4	0.17	0.48	0.29	0.31	0.25	1.39	0.2	0.61	0.85	0.28	1.44	0.86	0.44	0.11	0.51	0.97	0.76	0.26	0.24	0.42	--	--	--	--	--	--	--	--	--	--	--	--
c28389.graph_c0	0	0	0.61	0.2	0	0.45	0	0.15	0.54	0.36	0.21	0.37	0	0	0.19	0.06	0.31	0.88	0.51	0.57	0	0.38	0.33	0.62	0.76	0.42	0.79	0.66	--	--	--	--	--	--	--	--	--	--	--	--
c47155.graph_c0	0	0	0.68	0.23	0	0.91	1.34	0.75	0	0	0	0	0	3.73	0	1.24	0	0	0	0	0	0	0	0	0	0	0	0	--	--	--	--	--	--	--	--	--	--	--	--
c113173.graph_c0	0	0	0	0	0	0	0	0	0	0	0	0	0	0	0	0	0	0	0	0	0	0	0	0	0	0	2.77	0.92	--	--	--	--	--	--	--	--	--	--	--	--
c73159.graph_c0	27.76	21.25	30.78	26.6	27.83	26.43	26.28	26.85	30.02	28.9	29.86	29.59	30.22	34.5	27.3	30.67	36.51	34.93	46.39	39.28	46.89	47.5	45.68	42.66	42.48	39.6	40.37	40.82	--	Cellular Component: plasma membrane (GO:0005886);; Biological Process: protein transport (GO:0015031);; Cellular Component: integral component of membrane (GO:0016021);; Cellular Component: transport vesicle membrane (GO:0030658);;	K19995|8.8e-78|sind:105167911|K19995 secretory carrier-associated membrane protein | (RefSeq) secretory carrier-associated membrane protein 2-like	Intracellular trafficking, secretion, and vesicular transport	SCAMP family	Secretory carrier-associated membrane protein 5 OS=Arabidopsis thaliana OX=3702 GN=SCAMP5 PE=2 SV=2	Secretory carrier-associated membrane protein OS=Salvia splendens OX=180675 GN=Saspl_010644 PE=3 SV=1	Intracellular trafficking, secretion, and vesicular transport	hypothetical protein Saspl_010644 [Salvia splendens]	cellular component: cell (GO:0005623);; cellular component: membrane (GO:0016020);; cellular component: cell part (GO:0044464);; biological process: localization (GO:0051179);; cellular component: membrane part (GO:0044425);; cellular component: organelle (GO:0043226);; cellular component: organelle part (GO:0044422)	--	--
c106637.graph_c0	3.85	0	0	1.28	0	0	0	0	0	0	0	0	0	0	0	0	0	0	0	0	0	0	0	0	0	0	0	0	--	--	--	--	--	--	--	--	--	--	--	--
c52484.graph_c0	0	0	0	0	0	1.63	0	0.54	0.92	0	0	0.31	0.65	0	0	0.22	0	0	0.28	0.09	0.69	0.97	1.02	1.39	0	0	0	0	--	Molecular Function: zinc ion binding (GO:0008270);;	K15382|7.8e-28|spen:107015960|K15382 solute carrier family 50 (sugar transporter) | (RefSeq) bidirectional sugar transporter SWEET1-like isoform X1	General function prediction only	PPR repeat family;; PPR repeat;; PPR repeat;; Pentatricopeptide repeat domain	Pentatricopeptide repeat-containing protein At5g66520 OS=Arabidopsis thaliana OX=3702 GN=PCMP-H61 PE=2 SV=1	DYW_deaminase domain-containing protein OS=Salvia splendens OX=180675 GN=Saspl_010401 PE=3 SV=1	Function unknown	hypothetical protein Saspl_010401 [Salvia splendens]	molecular function: binding (GO:0005488)	--	--
c54621.graph_c0	0.6	1.21	2.06	1.29	0.81	1.28	1.99	1.36	2.52	2.31	1.61	2.15	1.73	2.76	1.41	1.97	1.35	2.11	2.4	1.95	4.99	2.64	4.14	4.8	4.89	3.38	6.51	4.93	--	Biological Process: immune system process (GO:0002376);; Cellular Component: cellular_component (GO:0005575);; Cellular Component: intracellular (GO:0005622);; Cellular Component: obsolete cell (GO:0005623);; Cellular Component: cytoplasm (GO:0005737);; Cellular Component: plasma membrane (GO:0005886);; Biological Process: response to stress (GO:0006950);; Biological Process: defense response (GO…	K13453|2.0e-27|sot:102596100|K13453 disease resistance protein | (RefSeq) putative late blight resistance protein homolog R1B-23	Signal transduction mechanisms	--	Putative late blight resistance protein homolog R1B-12 OS=Solanum demissum OX=50514 GN=R1B-12 PE=3 SV=2	Apoptotic ATPase OS=Handroanthus impetiginosus OX=429701 GN=CDL12_21779 PE=4 SV=1	Signal transduction mechanisms	putative late blight resistance protein homolog R1B-16 isoform X1 [Sesamum indicum]	biological process: immune system process (GO:0002376);; cellular component: cell (GO:0005623);; cellular component: cell part (GO:0044464);; cellular component: membrane (GO:0016020);; biological process: response to stimulus (GO:0050896);; biological process: cellular process (GO:0009987);; biological process: signaling (GO:0023052);; biological process: single-organism process (GO:0044699);; b…	Plant-pathogen interaction (ko04626)	--
c75505.graph_c1	2.05	2.37	3.48	2.63	4.94	1.47	1.8	2.74	2.85	2.8	1.32	2.32	2.97	3.46	4.27	3.57	3.35	3.31	5.6	4.09	5.56	5.73	5.06	3.89	5.29	1.34	4.16	3.6	--	--	--	--	--	--	--	--	--	--	--	--
c103213.graph_c0	0	0	0	0	0	0	0	0	0	0	0	0	0	0	0	0	0	0	0	0	0	0	0	0	0	0	0	0	--	Biological Process: hydrotropism (GO:0010274);;	--	--	--	Protein MIZU-KUSSEI 1 OS=Arabidopsis thaliana OX=3702 GN=MIZ1 PE=1 SV=1	Uncharacterized protein OS=Salvia splendens OX=180675 GN=Saspl_016296 PE=4 SV=1	--	hypothetical protein Saspl_016296 [Salvia splendens]	biological process: response to stimulus (GO:0050896)	--	--
c109235.graph_c0	0	0	0	0	0	0	0	0	0	0	0	0	0	0	0	0	0	0	0	0	0	0	0	0	0	0	0	0	--	--	--	--	--	--	--	--	--	--	--	--
c62946.graph_c0	3.94	3.92	3.58	3.81	3.45	4.02	5.75	4.41	11.26	3.12	3.88	6.09	9.13	2.92	4.55	5.53	6.89	4.93	1.63	4.48	6.65	3.67	5.07	4.89	3.09	4.79	2.85	3.58	--	--	--	--	--	--	--	--	--	--	--	--
c94092.graph_c0	0.98	0	0	0.33	0	0	0	0	0	1.64	0	0.55	0	0	0	0	0	0	0	0	0	0	0	0	0	0	0	0	--	Cellular Component: integral component of membrane (GO:0016021);;	--	Defense mechanisms	Inhibitor of apoptosis-promoting Bax1	Bax inhibitor 1 OS=Arabidopsis thaliana OX=3702 GN=BI-1 PE=1 SV=1	Bax inhibitor OS=Dorcoceras hygrometricum OX=472368 GN=F511_07576 PE=3 SV=1	Defense mechanisms	Bax inhibitor [Dorcoceras hygrometricum]	cellular component: membrane (GO:0016020);; cellular component: membrane part (GO:0044425)	--	--
c64441.graph_c0	0.84	0.41	0.42	0.56	0.2	0.23	1.01	0.48	0.73	0	0	0.24	0.2	0.2	0	0.13	0.32	0.54	0.81	0.56	0.81	1.34	1.67	2.85	0.19	0.85	0.6	0.55	--	Molecular Function: ADP binding (GO:0043531);;	--	--	--	--	Uncharacterized protein OS=Erythranthe guttata OX=4155 GN=MIMGU_mgv1a006756mg PE=4 SV=1	Signal transduction mechanisms	hypothetical protein MIMGU_mgv1a006756mg [Erythranthe guttata]	molecular function: binding (GO:0005488)	--	--
c95505.graph_c0	0	0	0	0	0	0	0	0	0	0	0	0	0	0	0	0	0	0	0	0	0	0	0	0	5.15	0	0	1.72	--	Biological Process: protein polyubiquitination (GO:0000209);; Biological Process: regulation of Toll signaling pathway (GO:0008592);; Molecular Function: ubiquitin protein ligase activity (GO:0061630);;	--	Signal transduction mechanisms	Pellino	--	--	--	protein pellino-like [Rhodamnia argentea]	biological process: metabolic process (GO:0008152);; biological process: cellular process (GO:0009987);; biological process: biological regulation (GO:0065007);; molecular function: catalytic activity (GO:0003824)	--	LOC115727267
c17790.graph_c0	0	0	0	0	0	0	0	0	0	0	0	0	0	0	0	0	0	0	0	0	0	0	0	0	0	0	0	0	--	--	--	--	--	--	--	--	--	--	--	--
c16390.graph_c0	0	0	0	0	0	0	0	0	0.23	0	0.14	0.12	0	0	0	0	0.21	1.04	0.11	0.45	0.13	0	0.32	0.82	0	0	0	0	--	--	--	--	--	--	--	--	--	--	--	--
c68011.graph_c0	4.91	2.52	2.33	3.25	3.38	2.42	3.27	3.02	3.52	2.96	3.77	3.42	2.11	2.93	2.48	2.51	3.25	3.09	2.77	3.04	3.71	3.41	3.92	4.64	2.71	4.24	4.64	3.86	--	Molecular Function: microtubule motor activity (GO:0003777);; Molecular Function: ATP binding (GO:0005524);; Biological Process: microtubule-based movement (GO:0007018);; Molecular Function: microtubule binding (GO:0008017);;	K10398|5.9e-104|sind:105170356|K10398 kinesin family member 11 | (RefSeq) kinesin-like protein KIN-5D	Cytoskeleton	Rop-like	Kinesin-like protein KIN-5D OS=Arabidopsis thaliana OX=3702 GN=KIN5D PE=3 SV=1	Kinesin family member 11 OS=Salvia splendens OX=180675 GN=KIF11 PE=3 SV=1	Cytoskeleton	kinesin family member 11 [Salvia splendens]	molecular function: catalytic activity (GO:0003824);; molecular function: binding (GO:0005488);; biological process: cellular process (GO:0009987);; biological process: single-organism process (GO:0044699)	--	--
c13641.graph_c0	0	0	0	0	0	0	0	0	0	0	0	0	0	0	0	0	0	0	0	0	0	0	0	0	0	0	0	0	--	Molecular Function: 1-phosphatidylinositol binding (GO:0005545);; Cellular Component: clathrin-coated vesicle (GO:0030136);; Molecular Function: clathrin binding (GO:0030276);; Biological Process: clathrin coat assembly (GO:0048268);;	--	--	--	Probable clathrin assembly protein At4g32285 OS=Arabidopsis thaliana OX=3702 GN=At4g32285 PE=1 SV=2	probable clathrin assembly protein At4g32285 OS=Nelumbo nucifera OX=4432 GN=LOC104586113 PE=4 SV=1	--	PREDICTED: probable clathrin assembly protein At4g32285 [Nelumbo nucifera]	molecular function: binding (GO:0005488);; cellular component: cell (GO:0005623);; cellular component: organelle (GO:0043226);; cellular component: cell part (GO:0044464);; biological process: cellular process (GO:0009987);; biological process: cellular component organization or biogenesis (GO:0071840)	--	LOC104586113
c28681.graph_c0	0	0.46	0	0.15	0	0	0.91	0.3	2.07	0	0	0.69	0.44	1.93	2.5	1.62	0.67	0.4	0.38	0.48	0.46	0	0.77	1.85	0	0	0	0	--	--	--	--	--	--	--	--	--	--	--	--
c66073.graph_c0	0	0	0	0	0.33	0	0.17	0.17	0	0.33	0.35	0.23	0.65	0.17	0.16	0.33	0.4	0.44	0.14	0.33	0	0.16	0.05	0	0	0	0.17	0.06	--	--	--	--	--	--	--	--	--	--	--	--
c96862.graph_c0	0	1.28	0	0.43	0	0	0	0	0	0	0	0	0	1.4	0	0.47	0	0	1.55	0.52	0	0	0	0	0	0	0	0	--	--	--	--	--	--	--	--	--	--	--	--
c44656.graph_c0	0	0	0	0	0	0	0	0	0	0	0	0	0	0	4.06	1.35	0	0	0	0	0	0	0	0	0	0	0	0	--	--	--	--	--	--	--	--	--	--	--	--
c32324.graph_c2	0	0	0	0	0	0	0.48	0.16	0	0	0	0	0	0	0	0	1.41	0	0	0.47	0	0	0	0	0.46	0	0	0.15	--	--	--	--	--	--	--	--	--	--	--	--
c66030.graph_c0	0.46	0.26	0	0.24	0.47	0.26	0.17	0.3	0	0	0	0	0.08	0.08	0.08	0.08	0.07	0.6	0.37	0.35	0.09	0.16	0.17	0.27	0.32	0	0	0.11	--	--	--	--	--	--	--	--	--	--	--	--
c53282.graph_c1	0	0.18	0.09	0.09	0	0	0	0	0.08	0	0	0.03	0.43	0.25	0.25	0.31	0	0	0.23	0.08	0.09	0	0.09	0.18	0.08	0	0.09	0.06	--	--	--	--	--	--	--	--	--	--	--	--
c63267.graph_c0	0.29	0	0	0.1	1.06	0.32	1.71	1.03	0	0.49	0.84	0.44	0	0	0	0	0.42	0	0.99	0.47	0.28	1.82	0.79	0.28	0	0.29	1.08	0.46	--	--	--	--	--	--	--	--	--	--	--	--
c633.graph_c1	0	0	0	0	0	0	0.22	0.07	0	0	1.15	0.38	0	0.22	0	0.07	0.34	0.98	0	0.44	0	0	0.23	0.69	0	0.46	0	0.15	--	Cellular Component: mitochondrial proton-transporting ATP synthase complex, coupling factor F(o) (GO:0000276);; Molecular Function: proton transmembrane transporter activity (GO:0015078);; Biological Process: ATP synthesis coupled proton transport (GO:0015986);;	--	--	Mitochondrial ATP synthase coupling factor 6	--	--	--	--	cellular component: cell (GO:0005623);; cellular component: membrane (GO:0016020);; cellular component: macromolecular complex (GO:0032991);; cellular component: organelle (GO:0043226);; cellular component: organelle part (GO:0044422);; cellular component: membrane part (GO:0044425);; cellular component: cell part (GO:0044464);; molecular function: transporter activity (GO:0005215);; biological p…	--	--
c107821.graph_c0	0	4.15	0	1.38	0	0	0	0	0	0	0	0	0	0	0	0	0	0	0	0	0	0	0	0	0	0	0	0	--	--	--	--	--	--	--	--	--	--	--	--
c31966.graph_c0	0	0	0.16	0.05	0	0	0	0	0	0.43	0	0.14	0	0	0.15	0.05	0.12	2.1	0	0.74	0.16	0	0.05	0	1.34	0.99	0	0.78	Carbohydrate transport and metabolism	Molecular Function: channel activity (GO:0015267);; Cellular Component: integral component of membrane (GO:0016021);;	K09873|5.4e-87|jre:108996816|K09873 aquaporin TIP | (RefSeq) aquaporin TIP1-1	Carbohydrate transport and metabolism	Major intrinsic protein	Probable aquaporin TIP1-1 OS=Oryza sativa subsp. japonica OX=39947 GN=TIP1-1 PE=2 SV=1	Aquaporin protein TIP1-1 OS=Camellia sinensis OX=4442 GN=TIP1-1 PE=2 SV=1	Carbohydrate transport and metabolism	probable aquaporin TIP1-1 [Camellia sinensis]	molecular function: transporter activity (GO:0005215);; biological process: localization (GO:0051179);; cellular component: membrane (GO:0016020);; cellular component: membrane part (GO:0044425)	--	LOC114322362
c77657.graph_c0	2.65	2.23	2.68	2.52	2.98	2.1	2.16	2.41	3.04	2.31	1.34	2.23	2.46	2.8	2.66	2.64	5.19	2.51	3.02	3.57	3.25	4.33	3.78	3.75	4.42	2.95	2.67	3.35	--	Molecular Function: molecular_function (GO:0003674);; Molecular Function: nucleic acid binding (GO:0003676);; Molecular Function: RNA binding (GO:0003723);; Molecular Function: catalytic activity (GO:0003824);; Molecular Function: nuclease activity (GO:0004518);; Molecular Function: endonuclease activity (GO:0004519);; Molecular Function: binding (GO:0005488);; Cellular Component: cellular_compon…	--	General function prediction only	PPR repeat family;; PPR repeat;; Pentatricopeptide repeat domain;; PPR repeat;; Pentacotripeptide-repeat region of PRORP	Pentatricopeptide repeat-containing protein At2g01390 OS=Arabidopsis thaliana OX=3702 GN=At2g01390/At2g01380 PE=2 SV=2	Pentatricopeptide repeat protein OS=Salvia miltiorrhiza OX=226208 PE=2 SV=1	Function unknown	pentatricopeptide repeat protein [Salvia miltiorrhiza]	molecular function: binding (GO:0005488);; molecular function: catalytic activity (GO:0003824);; biological process: metabolic process (GO:0008152);; biological process: cellular process (GO:0009987);; cellular component: cell (GO:0005623);; cellular component: cell part (GO:0044464);; cellular component: organelle (GO:0043226)	--	--
c74359.graph_c1	4.56	2.96	6.09	4.54	5.91	5.77	4.57	5.42	5.53	5.18	6.09	5.6	6.14	7.14	4.68	5.99	6.15	6.02	7.64	6.6	7.04	8.2	7.41	6.99	7.18	8.78	8.29	8.08	--	Cellular Component: cytoplasm (GO:0005737);; Biological Process: autophagy (GO:0006914);;	K08339|2.5e-64|sind:105175983|K08339 autophagy-related protein 5 | (RefSeq) autophagy protein 5 isoform X1	Posttranslational modification, protein turnover, chaperones	Autophagy protein Apg5	Autophagy protein 5 OS=Arabidopsis thaliana OX=3702 GN=ATG5 PE=2 SV=1	Autophagy protein 5 OS=Salvia splendens OX=180675 GN=ATG5 PE=3 SV=1	Posttranslational modification, protein turnover, chaperones	autophagy-related protein 5 [Salvia splendens]	cellular component: cell (GO:0005623);; cellular component: cell part (GO:0044464);; biological process: metabolic process (GO:0008152);; biological process: cellular process (GO:0009987)	Autophagy - other (ko04136)	--
c38518.graph_c1	0	0	0	0	0	0	0	0	0	0	0	0	0	0	0	0	0.61	1.08	0	0.56	0	0	0	0	0	0	0	0	--	--	--	--	--	--	--	--	--	--	--	--
c68776.graph_c0	78.04	62.74	73.36	71.38	80.43	83.5	70.88	78.27	77.09	77.71	74.5	76.43	78.05	74.57	67.08	73.23	70.02	68.35	67.13	68.5	61.92	67.28	68.28	75.65	62.72	59.78	63.89	62.13	--	--	--	--	cAMP-regulated phosphoprotein/endosulfine conserved region	--	Uncharacterized protein OS=Handroanthus impetiginosus OX=429701 GN=CDL12_13704 PE=3 SV=1	Function unknown	hypothetical protein CDL12_13704 [Handroanthus impetiginosus]	--	--	--
c29855.graph_c1	0	0	0	0	0	0	0	0	0	0	0	0	0	0	0	0	0	0.23	0.22	0.15	0	0	0.18	0.54	0	0.27	0	0.09	--	Cellular Component: proteasome complex (GO:0000502);; Molecular Function: molecular_function (GO:0003674);; Molecular Function: structural molecule activity (GO:0005198);; Cellular Component: cellular_component (GO:0005575);; Cellular Component: intracellular (GO:0005622);; Cellular Component: obsolete cell (GO:0005623);; Cellular Component: nucleus (GO:0005634);; Cellular Component: cytoplasm (G…	K03039|1.1e-28|pda:103718432|K03039 26S proteasome regulatory subunit N9 | (RefSeq) 26S proteasome non-ATPase regulatory subunit 13 homolog B-like	Posttranslational modification, protein turnover, chaperones	PCI domain	26S proteasome non-ATPase regulatory subunit 13 homolog B OS=Arabidopsis thaliana OX=3702 GN=RPN9B PE=1 SV=1	PCI domain-containing protein (Fragment) OS=Eragrostis curvula OX=38414 GN=EJB05_39452 PE=3 SV=1	Posttranslational modification, protein turnover, chaperones	26S proteasome non-ATPase regulatory subunit 13-like [Rhodamnia argentea]	cellular component: cell (GO:0005623);; cellular component: macromolecular complex (GO:0032991);; cellular component: cell part (GO:0044464);; molecular function: structural molecule activity (GO:0005198);; cellular component: organelle (GO:0043226);; biological process: metabolic process (GO:0008152);; biological process: cellular process (GO:0009987);; biological process: cellular component org…	Proteasome (ko03050)	LOC115757380
c52379.graph_c0	0	0.52	0	0.17	0	0	0	0	0	0	0.53	0.18	1.01	0	0	0.34	0	0.23	0	0.08	0	0	0	0	0.49	0	0.51	0.33	--	--	--	--	--	--	--	--	--	--	--	--
c22287.graph_c1	0	0	0	0	0	0	0	0	0	0	0	0	0	0	0	0	0	0	0	0	0	0	0	0	0	0	0	0	--	--	--	--	--	--	--	--	--	--	--	--
c105881.graph_c0	0	0	0	0	0	0	0	0	0	0	0	0	4.83	0	0	1.61	0	0	0	0	0	0	0	0	0	0	0	0	--	--	--	--	--	--	--	--	--	--	--	--
c83656.graph_c0	8.81	4.16	7.18	6.72	8.63	5.06	5.61	6.43	7.98	6.89	6.02	6.96	6.29	5.79	7.39	6.49	7.86	8	7.78	7.88	6.55	10.46	8.52	8.56	7.27	7.14	8.15	7.52	--	Cellular Component: endoplasmic reticulum membrane (GO:0005789);; Biological Process: GPI anchor biosynthetic process (GO:0006506);; Cellular Component: integral component of membrane (GO:0016021);;	K07541|2.0e-84|sind:105155997|K07541 GPI mannosyltransferase 1 subunit X | (RefSeq) phosphatidylinositol-glycan biosynthesis class X protein isoform X1	--	PIG-X / PBN1	--	Uncharacterized protein OS=Handroanthus impetiginosus OX=429701 GN=CDL12_21610 PE=3 SV=1	Function unknown	hypothetical protein CDL12_21610 [Handroanthus impetiginosus]	cellular component: cell (GO:0005623);; cellular component: membrane (GO:0016020);; cellular component: organelle (GO:0043226);; cellular component: organelle part (GO:0044422);; cellular component: membrane part (GO:0044425);; cellular component: cell part (GO:0044464);; biological process: metabolic process (GO:0008152);; biological process: cellular process (GO:0009987);; biological process: s…	Glycosylphosphatidylinositol (GPI)-anchor biosynthesis (ko00563)	--
c68850.graph_c0	21.94	22.2	18.97	21.04	19.28	13.47	26.56	19.77	21.81	22.41	19.61	21.28	27.83	19.9	24.79	24.17	24.72	22.1	22.71	23.18	25.43	26.1	24.6	22.27	24.67	21.15	29.23	25.02	--	Molecular Function: DNA binding (GO:0003677);; Cellular Component: nucleus (GO:0005634);;	--	Posttranslational modification, protein turnover, chaperones	--	Protein REVEILLE 6 OS=Arabidopsis thaliana OX=3702 GN=RVE6 PE=2 SV=1	HTH myb-type domain-containing protein OS=Salvia splendens OX=180675 GN=Saspl_020379 PE=4 SV=1	Transcription	hypothetical protein Saspl_020379 [Salvia splendens]	molecular function: binding (GO:0005488);; cellular component: cell (GO:0005623);; cellular component: organelle (GO:0043226);; cellular component: cell part (GO:0044464)	--	--
c346.graph_c1	0	0.41	0.21	0.21	0.2	0	0	0.07	0	0	0	0	0	0.2	0	0.07	0.47	0	0	0.16	0	0	0	0	0.19	0.21	0	0.13	--	--	--	--	--	--	--	--	--	--	--	--
c94961.graph_c0	0	0	0	0	0	0	0	0	0	0	0	0	0	0	0	0	0	0	0	0	3.05	0	1.02	0	0	0	0	0	--	--	--	--	--	--	--	--	--	--	--	--
c59823.graph_c0	0.89	0.42	5.05	2.12	3.24	0	0	1.08	0.75	0	0	0.25	0	0	0	0	2.16	1.08	2.06	1.77	1.69	0.79	1.11	0.84	0.64	0.88	0.82	0.78	--	Molecular Function: protein kinase activity (GO:0004672);; Molecular Function: ATP binding (GO:0005524);; Cellular Component: integral component of membrane (GO:0016021);;	K00924|1.1e-09|ini:109171122|K00924 kinase [EC:2.7.1.-] | (RefSeq) receptor-like protein kinase HSL1	--	--	Probable inactive receptor kinase At5g10020 OS=Arabidopsis thaliana OX=3702 GN=At5g10020 PE=1 SV=2	Protein kinase domain-containing protein OS=Salvia splendens OX=180675 GN=Saspl_039080 PE=4 SV=1	Signal transduction mechanisms	hypothetical protein Saspl_039080 [Salvia splendens]	molecular function: catalytic activity (GO:0003824);; biological process: metabolic process (GO:0008152);; biological process: cellular process (GO:0009987);; molecular function: binding (GO:0005488);; cellular component: membrane (GO:0016020);; cellular component: membrane part (GO:0044425)	--	--
c80774.graph_c0	20.99	18.9	29.95	23.28	20.73	21.5	34.54	25.59	27.1	22.46	36.62	28.73	29.64	40.96	27.14	32.58	25.17	34.34	35.05	31.52	37.05	46.54	41.7	41.5	47.71	49.18	49.65	48.85	--	--	--	--	--	--	Uncharacterized protein OS=Salvia splendens OX=180675 GN=Saspl_010702 PE=4 SV=1	Function unknown	hypothetical protein Saspl_010702 [Salvia splendens]	--	--	--
c67895.graph_c0	0.42	0.54	0.95	0.64	1.07	0.26	1.03	0.79	0.55	0.88	0.41	0.61	0.85	0.29	1.09	0.74	0.23	1.31	0.33	0.62	0.84	0.7	0.58	0.2	0	0.4	0.19	0.2	--	Molecular Function: nucleic acid binding (GO:0003676);; Molecular Function: peroxidase activity (GO:0004601);; Biological Process: DNA integration (GO:0015074);;	K03686|3.7e-15|ghi:107900121|K03686 molecular chaperone DnaJ | (RefSeq) uncharacterized protein LOC107900121	General function prediction only	--	Uncharacterized mitochondrial protein AtMg00850 OS=Arabidopsis thaliana OX=3702 GN=AtMg00850 PE=4 SV=1	Peroxidase 64 OS=Dorcoceras hygrometricum OX=472368 GN=F511_01304 PE=4 SV=1	Replication, recombination and repair	uncharacterized protein LOC110626658 [Manihot esculenta]	molecular function: binding (GO:0005488);; molecular function: catalytic activity (GO:0003824);; molecular function: antioxidant activity (GO:0016209);; biological process: metabolic process (GO:0008152);; biological process: cellular process (GO:0009987);; biological process: single-organism process (GO:0044699);; biological process: response to stimulus (GO:0050896);; biological process: detoxi…	--	--
c46143.graph_c0	0	0	0.48	0.16	0	0	0	0	0	0.42	0	0.14	0	0	0	0	0	0	0.75	0.25	0	0	0	0	0	0	0	0	--	--	--	--	--	--	--	--	--	--	--	--
c25528.graph_c0	0.95	0.15	0.75	0.62	0.28	0.16	1.33	0.59	0.26	0.4	0.15	0.27	0.43	0.58	0.41	0.47	1.27	0.65	1	0.97	0.3	0.56	0.49	0.61	0.14	0.46	0	0.2	--	--	--	--	--	--	--	--	--	--	--	--
c39872.graph_c0	0	0	0.13	0.04	0	0	0	0	0	0	0	0	0	0	0	0	0	2.28	0.11	0.8	0	0	0	0	2.15	0.38	0	0.84	--	Biological Process: metal ion transport (GO:0030001);; Molecular Function: metal ion binding (GO:0046872);;	--	Inorganic ion transport and metabolism	Heavy-metal-associated domain	Heavy metal-associated isoprenylated plant protein 3 OS=Arabidopsis thaliana OX=3702 GN=HIPP03 PE=1 SV=1	Heavy metal-associated isoprenylated plant protein (Fragment) OS=Actinidia chinensis var. chinensis OX=1590841 GN=CEY00_Acc30128 PE=4 SV=1	Inorganic ion transport and metabolism	hypothetical protein HYC85_025194 [Camellia sinensis]	biological process: localization (GO:0051179);; molecular function: binding (GO:0005488)	--	--
c552.graph_c0	0.16	0	0	0.05	0	1.18	0.15	0.44	0.41	0	0	0.14	0	0	0	0	0	0	0.55	0.18	0.34	0	0.11	0	0.31	0.95	0.15	0.47	--	--	--	--	--	--	--	--	--	--	--	--
c74120.graph_c0	30.2	20.43	33.39	28.01	40.44	48.93	29.9	39.76	30.44	25.91	20.39	25.58	26.88	22.74	18.97	22.86	34.32	28.97	45.96	36.42	30.83	32.71	29.33	24.46	23.35	24.66	30.29	26.1	--	--	--	--	Putative quorum-sensing-regulated virulence factor	--	Uncharacterized protein OS=Salvia splendens OX=180675 GN=Saspl_040679 PE=4 SV=1	Function unknown	hypothetical protein Saspl_040679 [Salvia splendens]	--	--	--
c78094.graph_c0	177.37	154.57	373.14	235.03	302.8	122.14	84.46	169.8	151.7	191.32	60.62	134.55	86.21	55.04	97.35	79.53	268.73	175.67	278.08	240.83	251.79	156.79	180.34	132.45	159.75	100.87	105.91	122.18	--	Biological Process: defense response (GO:0006952);;	--	--	Gamma-thionin family	Defensin SD2 OS=Helianthus annuus OX=4232 GN=SD2 PE=2 SV=1	Knot1 domain-containing protein OS=Handroanthus impetiginosus OX=429701 GN=CDL12_29837 PE=4 SV=1	Signal transduction mechanisms	hypothetical protein CDL12_29837 [Handroanthus impetiginosus]	biological process: response to stimulus (GO:0050896)	--	--
c81668.graph_c1	2.56	2.78	2.59	2.64	2.11	1.46	2.44	2	2.67	2.93	2.32	2.64	2.85	2.66	1.97	2.49	1.89	2.17	2.06	2.04	2.97	2.46	2.47	1.98	2.67	1.95	1.86	2.16	--	Molecular Function: molecular_function (GO:0003674);; Molecular Function: nucleic acid binding (GO:0003676);; Molecular Function: RNA binding (GO:0003723);; Molecular Function: catalytic activity (GO:0003824);; Molecular Function: nuclease activity (GO:0004518);; Molecular Function: endonuclease activity (GO:0004519);; Molecular Function: binding (GO:0005488);; Cellular Component: cellular_compon…	K22262|5.7e-84|qsu:112034235|K22262 WD repeat and FYVE domain-containing protein 3 | (RefSeq) protein SPIRRIG	General function prediction only	PPR repeat family;; PPR repeat;; PPR repeat;; Pentatricopeptide repeat domain;; Pentacotripeptide-repeat region of PRORP	Pentatricopeptide repeat-containing protein At1g71490 OS=Arabidopsis thaliana OX=3702 GN=PCMP-E67 PE=2 SV=1	Pentatricopeptide repeat protein OS=Salvia miltiorrhiza OX=226208 PE=2 SV=1	Function unknown	pentatricopeptide repeat protein [Salvia miltiorrhiza]	molecular function: binding (GO:0005488);; molecular function: catalytic activity (GO:0003824);; biological process: metabolic process (GO:0008152);; biological process: cellular process (GO:0009987);; cellular component: cell (GO:0005623);; cellular component: cell part (GO:0044464);; cellular component: organelle (GO:0043226)	--	--
c82579.graph_c2	6.77	3.86	11.8	7.48	2.31	4.53	5.51	4.12	3.16	4.12	6.62	4.63	5.88	4.03	7.5	5.8	4.51	2	5.51	4.01	5.16	4.85	5.06	5.16	3.55	6.48	7.17	5.73	--	--	--	Function unknown	DTW domain	--	tRNA-uridine aminocarboxypropyltransferase OS=Salvia splendens OX=180675 GN=Saspl_027984 PE=4 SV=1	Function unknown	hypothetical protein Saspl_027984 [Salvia splendens]	--	--	--
c85411.graph_c0	2.04	2.19	2.36	2.2	2.63	1.69	3.08	2.47	2.38	1.74	2.98	2.37	3.09	2.85	3.07	3	2.25	3.71	4.8	3.59	2.61	3.41	3.33	3.98	3.59	4.14	3.54	3.76	--	Molecular Function: protein binding (GO:0005515);; Cellular Component: cellular_component (GO:0005575);; Cellular Component: intracellular (GO:0005622);; Cellular Component: obsolete cell (GO:0005623);; Cellular Component: cytoplasm (GO:0005737);; Cellular Component: cytosol (GO:0005829);; Cellular Component: plasma membrane (GO:0005886);; Biological Process: cell cycle (GO:0007049);; Biological …	--	General function prediction only	WD domain, G-beta repeat	--	Uncharacterized protein OS=Salvia splendens OX=180675 GN=Saspl_009490 PE=4 SV=1	Function unknown	hypothetical protein Saspl_009490 [Salvia splendens]	molecular function: binding (GO:0005488);; cellular component: cell (GO:0005623);; cellular component: cell part (GO:0044464);; cellular component: membrane (GO:0016020);; biological process: cellular process (GO:0009987);; biological process: single-organism process (GO:0044699);; biological process: biological regulation (GO:0065007)	--	--
c71600.graph_c1	43.97	42.95	36.54	41.15	45.05	40.6	37.18	40.94	40.4	43.28	37.5	40.39	36.25	31.72	40.57	36.18	40.58	38.42	36.92	38.64	38.14	35.23	35.2	32.22	33.28	30.71	33.42	32.47	--	Biological Process: immune system process (GO:0002376);; Molecular Function: molecular_function (GO:0003674);; Molecular Function: transporter activity (GO:0005215);; Molecular Function: ion channel activity (GO:0005216);; Molecular Function: intracellular ligand-gated ion channel activity (GO:0005217);; Molecular Function: intracellular cyclic nucleotide activated cation channel activity (GO:000…	K05391|2.8e-172|sind:105167629|K05391 cyclic nucleotide gated channel, plant | (RefSeq) cyclic nucleotide-gated ion channel 2-like	--	--	Cyclic nucleotide-gated ion channel 2 OS=Arabidopsis thaliana OX=3702 GN=CNGC2 PE=1 SV=1	Cyclic nucleotide gated channel, other eukaryote OS=Salvia splendens OX=180675 GN=CNGF PE=4 SV=1	Inorganic ion transport and metabolism	cyclic nucleotide gated channel, other eukaryote [Salvia splendens]	biological process: immune system process (GO:0002376);; molecular function: transporter activity (GO:0005215);; biological process: localization (GO:0051179);; molecular function: molecular transducer activity (GO:0060089);; biological process: cellular process (GO:0009987);; biological process: single-organism process (GO:0044699);; biological process: biological regulation (GO:0065007);; molec…	Plant-pathogen interaction (ko04626)	--
c38405.graph_c1	0	0	0	0	0	0	0.49	0.16	0	0	0	0	0	0	0	0	0.49	0.98	0.21	0.56	0	0	0.13	0.38	0	0	0	0	Lipid transport and metabolism	Biological Process: long-chain fatty acid metabolic process (GO:0001676);; Molecular Function: molecular_function (GO:0003674);; Molecular Function: catalytic activity (GO:0003824);; Molecular Function: long-chain fatty acid-CoA ligase activity (GO:0004467);; Cellular Component: cellular_component (GO:0005575);; Cellular Component: intracellular (GO:0005622);; Cellular Component: obsolete cell (G…	K01897|1.2e-35|adu:107464754|K01897 long-chain acyl-CoA synthetase [EC:6.2.1.3] | (RefSeq) long chain acyl-CoA synthetase 8	Lipid transport and metabolism	AMP-binding enzyme	Long chain acyl-CoA synthetase 8 OS=Arabidopsis thaliana OX=3702 GN=LACS8 PE=1 SV=1	AMP-binding domain-containing protein OS=Trifolium subterraneum OX=3900 GN=TSUD_325440 PE=4 SV=1	Lipid transport and metabolism	hypothetical protein TSUD_325440 [Trifolium subterraneum]	biological process: metabolic process (GO:0008152);; biological process: cellular process (GO:0009987);; biological process: single-organism process (GO:0044699);; molecular function: catalytic activity (GO:0003824);; cellular component: cell (GO:0005623);; cellular component: cell part (GO:0044464);; cellular component: organelle (GO:0043226);; cellular component: organelle part (GO:0044422);; c…	Fatty acid biosynthesis (ko00061);; Fatty acid degradation (ko00071);; Fatty acid metabolism (ko01212);; Peroxisome (ko04146)	--
c60718.graph_c0	0.24	0.09	0.09	0.14	0.09	0.18	0.14	0.14	0.08	0.04	0.14	0.09	0.13	0.43	0	0.19	0.11	0	0.12	0.08	0.14	0.17	0.21	0.33	0.13	0.18	0	0.1	--	--	--	--	--	--	--	--	--	--	--	--
c52045.graph_c0	0	0.23	0	0.08	0.22	0	0.12	0.11	0	0	0.85	0.28	0	0	0.43	0.14	0.18	0.41	0.99	0.53	0.36	0	0.28	0.48	0.22	0.6	0.34	0.39	--	--	--	--	PPR repeat family;; PPR repeat;; PPR repeat;; Pentatricopeptide repeat domain;; Pentacotripeptide-repeat region of PRORP	--	Leucine-rich PPR motif-containing protein, mitochondrial OS=Salvia splendens OX=180675 GN=LRPPRC PE=4 SV=1	--	leucine-rich PPR motif-containing protein, mitochondrial [Salvia splendens]	--	--	--
c91022.graph_c0	0	0	0.47	0.16	0	0.58	0.46	0.35	0	0	0	0	0	0	0	0	0.68	0	0.38	0.35	0	0	0	0	0	0.49	0	0.16	--	--	--	--	--	--	--	--	--	--	--	--
c102033.graph_c0	0	0	0	0	3.33	0	0	1.11	0	0	0	0	0	0	0	0	0	0	0	0	0	0	0	0	0	0	0	0	--	--	--	--	Mitochondrial inner membrane protein	--	--	--	hypothetical protein K493DRAFT_405371 [Basidiobolus meristosporus CBS 931.73]	--	--	--
c83053.graph_c0	16.36	17.49	23.23	19.03	17.82	20.37	16.88	18.36	19.48	16.1	16.67	17.42	22.53	19.51	20.56	20.87	15.87	19.43	24.13	19.81	21.99	22.07	21.13	19.34	22.68	24.46	21.44	22.86	--	--	--	--	Ring finger domain;; RING-like zinc finger;; Zinc finger, C3HC4 type (RING finger);; RING-type zinc-finger;; Zinc finger, C3HC4 type (RING finger)	E3 ubiquitin-protein ligase RFI2 OS=Arabidopsis thaliana OX=3702 GN=RFI2 PE=1 SV=2	RING-type domain-containing protein OS=Salvia splendens OX=180675 GN=Saspl_001773 PE=4 SV=1	Posttranslational modification, protein turnover, chaperones	hypothetical protein Saspl_001773 [Salvia splendens]	--	--	--
c90500.graph_c0	0	0.46	0.12	0.19	0	0.12	0.12	0.08	0	0	0.48	0.16	0.22	1.01	0.11	0.45	0.18	0.2	0.1	0.16	0	0	0	0	0	0.36	0	0.12	--	Cellular Component: integral component of membrane (GO:0016021);;	--	--	--	Protein NUCLEAR FUSION DEFECTIVE 4 OS=Arabidopsis thaliana OX=3702 GN=NFD4 PE=3 SV=1	Major facilitator superfamily protein (Fragment) OS=Striga asiatica OX=4170 GN=STAS_03871 PE=3 SV=1	Function unknown	major facilitator superfamily protein, partial [Striga asiatica]	cellular component: membrane (GO:0016020);; cellular component: membrane part (GO:0044425)	--	--
c70804.graph_c0	2.8	4.58	3.87	3.75	3.56	2.66	5.15	3.79	9.31	6.03	2.44	5.93	5.38	68.54	3.14	25.69	4.77	9.92	3.59	6.09	9.27	64.1	28.76	12.92	3.99	9.04	3.91	5.65	--	Molecular Function: peroxidase activity (GO:0004601);; Cellular Component: extracellular region (GO:0005576);; Biological Process: response to oxidative stress (GO:0006979);; Molecular Function: heme binding (GO:0020037);; Biological Process: hydrogen peroxide catabolic process (GO:0042744);; Molecular Function: metal ion binding (GO:0046872);;	K00430|3.8e-141|sind:105174640|K00430 peroxidase [EC:1.11.1.7] | (RefSeq) cationic peroxidase 1	--	Peroxidase	Cationic peroxidase 1 OS=Arachis hypogaea OX=3818 GN=PNC1 PE=1 SV=2	Peroxidase OS=Handroanthus impetiginosus OX=429701 GN=CDL12_11609 PE=3 SV=1	Secondary metabolites biosynthesis, transport and catabolism	Peroxidase [Handroanthus impetiginosus]	molecular function: catalytic activity (GO:0003824);; molecular function: antioxidant activity (GO:0016209);; biological process: metabolic process (GO:0008152);; biological process: cellular process (GO:0009987);; biological process: single-organism process (GO:0044699);; biological process: response to stimulus (GO:0050896);; biological process: detoxification (GO:0098754);; cellular component:…	Phenylpropanoid biosynthesis (ko00940)	--
c4520.graph_c0	0	0	0	0	0	0	0	0	0	0	0	0	0	0	0	0	0	0	0	0	0	0	0	0	0	0	0	0	--	--	--	--	--	--	--	--	--	--	--	--
c112750.graph_c0	0	0	0	0	0	0	0	0	0	0	0	0	0	0	0	0	0	0	0	0	0	0	0	0	0	0	0	0	--	--	--	--	--	--	--	--	--	--	--	--
c22719.graph_c0	0	0	0	0	0	0	0	0	0	0	0	0	0	0	0	0	0	0	0	0	0	0	0	0	0	0	0	0	--	Molecular Function: protein binding (GO:0005515);;	--	--	Ubiquitin family;; DUF2407 ubiquitin-like domain	--	--	--	--	molecular function: binding (GO:0005488)	--	--
c42682.graph_c1	0	0.95	0	0.32	0	0	0	0	0	0	0	0	0	0	0	0	0	0	0.39	0.13	0	0	0	0	0	0	1.4	0.47	--	--	--	--	Protein of unknown function (DUF295)	--	DUF295 domain-containing protein OS=Striga asiatica OX=4170 GN=STAS_34327 PE=4 SV=1	Function unknown	hypothetical protein STAS_34327 [Striga asiatica]	--	--	--
c18052.graph_c0	0	0	0	0	0	0	0	0	0	0	0	0	0	0	0	0	0	0	0	0	0	0	0	0	0	0	0	0	--	--	--	--	--	--	--	--	--	--	--	--
c79669.graph_c0	11.2	12.53	11.81	11.85	10.84	5.56	9.63	8.68	12.09	8.3	8.05	9.48	7.28	8.58	10.91	8.92	17.12	13.64	11.15	13.97	14.63	14.64	14.18	13.27	12.73	23.5	14.16	16.8	--	Molecular Function: molecular_function (GO:0003674);; Molecular Function: nucleic acid binding (GO:0003676);; Molecular Function: RNA binding (GO:0003723);; Molecular Function: catalytic activity (GO:0003824);; Molecular Function: nuclease activity (GO:0004518);; Molecular Function: endonuclease activity (GO:0004519);; Molecular Function: binding (GO:0005488);; Cellular Component: cellular_compon…	--	General function prediction only	PPR repeat family;; Pentatricopeptide repeat domain;; PPR repeat;; Pentacotripeptide-repeat region of PRORP;; PPR repeat	Pentatricopeptide repeat-containing protein At4g35850, mitochondrial OS=Arabidopsis thaliana OX=3702 GN=At4g35850 PE=1 SV=1	Uncharacterized protein OS=Salvia splendens OX=180675 GN=Saspl_019721 PE=4 SV=1	Function unknown	hypothetical protein Saspl_019721 [Salvia splendens]	molecular function: binding (GO:0005488);; molecular function: catalytic activity (GO:0003824);; biological process: metabolic process (GO:0008152);; biological process: cellular process (GO:0009987);; cellular component: cell (GO:0005623);; cellular component: cell part (GO:0044464);; cellular component: organelle (GO:0043226)	--	--
c54829.graph_c0	0.62	0	0.39	0.34	0	0	0.19	0.06	0.17	0	0	0.06	0.19	0	0	0.06	0	0.34	0.33	0.22	0	0	0.2	0.6	0.36	0	0	0.12	--	--	--	--	--	--	--	--	--	--	--	--
c96531.graph_c0	0	0	0	0	0	0	0.5	0.17	0	0	0	0	0	0	0	0	0	0.22	0	0.07	0	0.24	0.08	0	0	0.26	0.24	0.17	--	--	--	--	--	--	--	--	--	--	--	--
c48188.graph_c0	0	0	0	0	0	0	0	0	0	0	0	0	0	0	0	0	0.31	0	0	0.1	0	0.4	0.13	0	0	0	0	0	--	--	--	--	--	--	--	--	--	--	--	--
c67330.graph_c0	0.65	0.11	0	0.25	0.52	0.12	0.68	0.44	0.27	0.1	0.51	0.29	0.44	1.23	1.81	1.16	0.45	0.24	0.38	0.36	0.34	0.32	0.52	0.9	0.52	0.7	0.44	0.55	--	--	--	--	--	--	--	--	--	--	--	--
c44219.graph_c0	2.81	4.39	7.51	4.9	6.85	6.62	6.16	6.54	2.79	3.54	7.13	4.49	6.49	3.74	6.34	5.52	2.93	2.74	2.86	2.84	2.66	6.76	4.08	2.81	2.12	3.75	4.69	3.52	--	--	--	--	--	--	Uncharacterized protein OS=Theobroma cacao OX=3641 GN=TCM_027325 PE=4 SV=1	--	Uncharacterized protein TCM_027325 [Theobroma cacao]	--	--	--
c30780.graph_c0	0	0	0	0	0	0	2.52	0.84	0	0	0	0	0	0	0	0	0	0	0	0	0	0	0	0	0	0	0	0	--	--	--	--	--	--	--	--	--	--	--	--
c64036.graph_c0	3.09	2.01	2.26	2.45	4.56	2.41	2.8	3.26	3.56	2.89	3.72	3.39	3	3.35	3.88	3.41	3.53	3.75	4.32	3.87	2.96	2.45	3.28	4.42	5.22	3.57	2.57	3.79	--	--	--	--	--	--	--	--	--	--	--	--
c34364.graph_c0	0	0	0	0	0	0	0	0	0	0	0	0	0	0	0	0	0	0	0	0	0	0	0	0	0	0	0	0	--	Molecular Function: RNA binding (GO:0003723);;	--	Cell cycle control, cell division, chromosome partitioning	--	--	Uncharacterized protein OS=Salvia splendens OX=180675 GN=Saspl_011410 PE=4 SV=1	RNA processing and modification	protein terminal ear1-like [Sesamum indicum]	molecular function: binding (GO:0005488)	--	--
c1775.graph_c0	0	0	0	0	0	0	0	0	0	1.9	1.41	1.1	0	0	0	0	0	0	0	0	0	0	0	0	0	0	0	0	--	--	--	--	--	--	--	--	--	--	--	--
c82743.graph_c0	2.02	1.52	1.95	1.83	1.06	1.18	1.49	1.24	2.16	1.15	2.1	1.8	1.83	1.25	1.33	1.47	2.38	2.45	2.7	2.51	1.65	1.87	1.96	2.35	1.99	2.64	2.27	2.3	Replication, recombination and repair	Molecular Function: single-stranded DNA binding (GO:0003697);; Molecular Function: ATP binding (GO:0005524);; Biological Process: DNA repair (GO:0006281);; Molecular Function: DNA-dependent ATPase activity (GO:0008094);;	K03553|2.3e-94|ghi:107897727|K03553 recombination protein RecA | (RefSeq) DNA repair protein recA homolog 3, mitochondrial-like	Replication, recombination and repair	recA bacterial DNA recombination protein;; Rad51;; KaiC;; ATPase family associated with various cellular activities (AAA);; Protein of unknown function (DUF4005)	DNA repair protein recA homolog 2, mitochondrial OS=Arabidopsis thaliana OX=3702 GN=At3g10140 PE=2 SV=1	Recombination protein RecA OS=Salvia splendens OX=180675 GN=recA PE=3 SV=1	Replication, recombination and repair	recombination protein RecA [Salvia splendens]	molecular function: binding (GO:0005488);; biological process: metabolic process (GO:0008152);; biological process: cellular process (GO:0009987);; biological process: response to stimulus (GO:0050896);; molecular function: catalytic activity (GO:0003824)	Homologous recombination (ko03440)	--
c112190.graph_c0	0	0	0	0	0	0	0	0	0	0	0	0	0	0	0	0	0	4.39	0	1.46	0	0	0	0	0	0	0	0	--	Biological Process: mRNA splicing, via spliceosome (GO:0000398);; Molecular Function: RNA binding (GO:0003723);; Cellular Component: spliceosomal complex (GO:0005681);; Cellular Component: U6 snRNP (GO:0005688);; Cellular Component: U4/U6 x U5 tri-snRNP complex (GO:0046540);;	K12627|7.6e-11|nnu:104603070|K12627 U6 snRNA-associated Sm-like protein LSm8 | (RefSeq) sm-like protein LSM8	RNA processing and modification	--	Sm-like protein LSM8 OS=Arabidopsis thaliana OX=3702 GN=LSM8 PE=1 SV=1	U6 snRNA-associated Sm-like protein LSm8 OS=Nelumbo nucifera OX=4432 GN=LOC104603070 PE=3 SV=1	RNA processing and modification	small nuclear ribonucleoprotein family protein [Striga asiatica]	biological process: metabolic process (GO:0008152);; biological process: cellular process (GO:0009987);; molecular function: binding (GO:0005488);; cellular component: cell (GO:0005623);; cellular component: macromolecular complex (GO:0032991);; cellular component: organelle (GO:0043226);; cellular component: organelle part (GO:0044422);; cellular component: cell part (GO:0044464)	RNA degradation (ko03018);; Spliceosome (ko03040)	--
c113552.graph_c0	0	0	0	0	0	0	0	0	0	0	0	0	0	0	0	0	0	0	0	0	0	0	0	0	0	0	0	0	--	Molecular Function: nucleic acid binding (GO:0003676);; Molecular Function: RNA-DNA hybrid ribonuclease activity (GO:0004523);;	--	--	--	--	Uncharacterized protein OS=Beta vulgaris subsp. vulgaris OX=3555 PE=4 SV=1	Amino acid transport and metabolism	PREDICTED: uncharacterized protein LOC104891964 [Beta vulgaris subsp. vulgaris]	molecular function: binding (GO:0005488);; molecular function: catalytic activity (GO:0003824);; biological process: metabolic process (GO:0008152);; biological process: cellular process (GO:0009987)	--	LOC104891964
c59656.graph_c0	0.62	0.58	0	0.4	0	0	0	0	0.26	0	1.18	0.48	0.28	0.29	0.27	0.28	0	0	0	0	0	0	0.1	0.3	0.82	0	0	0.27	--	--	--	--	--	--	--	--	--	--	--	--
c86211.graph_c0	7.93	8.84	10.16	8.98	9.27	8.99	9.65	9.3	9.35	8.07	8.36	8.59	8.71	9.26	10.26	9.41	9.16	8.26	8.85	8.76	8.82	9.08	9.11	9.43	8.95	9.01	8.44	8.8	--	Molecular Function: metal ion binding (GO:0046872);;	--	--	PHD-finger;; DDT domain;; WSTF, HB1, Itc1p, MBD9 motif 1	DDT domain-containing protein PTM OS=Arabidopsis thaliana OX=3702 GN=PTM PE=1 SV=1	Uncharacterized protein OS=Salvia splendens OX=180675 GN=Saspl_007060 PE=4 SV=1	--	hypothetical protein Saspl_007060 [Salvia splendens]	molecular function: binding (GO:0005488)	--	--
c75318.graph_c0	6.45	5.51	10.76	7.57	7	5.58	5.63	6.07	7.6	6.69	6.92	7.07	5.76	7.95	6.9	6.87	6.22	12.56	7.87	8.88	7.3	9.29	8.58	9.16	9.24	7.01	7.04	7.76	--	Molecular Function: translation initiation factor activity (GO:0003743);; Biological Process: regulation of transcription, DNA-templated (GO:0006355);; Biological Process: transcription initiation from RNA polymerase II promoter (GO:0006367);;	K03136|1.9e-55|sind:105162652|K03136 transcription initiation factor TFIIE subunit alpha | (RefSeq) transcription initiation factor IIE subunit alpha	Transcription	--	NADH-ubiquinone oxidoreductase chain 4 OS=Arabidopsis thaliana OX=3702 GN=ND4 PE=2 SV=2	Transcription initiation factor IIE subunit alpha OS=Salvia splendens OX=180675 GN=TFIIE1 PE=3 SV=1	Transcription	transcription initiation factor TFIIE subunit alpha [Salvia splendens]	molecular function: binding (GO:0005488);; biological process: metabolic process (GO:0008152);; biological process: cellular process (GO:0009987);; biological process: biological regulation (GO:0065007)	Basal transcription factors (ko03022)	--
c31079.graph_c0	0	0	0	0	0	0	0	0	0	0	0	0	0	0	0	0	0	0	0	0	0	0	0	0	0	0	0	0	--	--	--	--	--	--	--	--	--	--	--	--
c13726.graph_c0	0	0	0	0	0	0	0	0	0	0	0	0	0	0	0	0	0	0	0	0	0	0	0	0	0	0	0	0	--	--	--	--	--	--	--	--	--	--	--	--
c51585.graph_c1	0	0	1.44	0.48	0.34	0	0.71	0.35	0	0	0	0	0	0	0.65	0.22	0	0	0	0	0	0	0.12	0.36	0	0.75	0	0.25	--	--	--	--	--	--	--	--	--	--	--	--
c111394.graph_c0	0	0	0	0	0	0	0	0	0	0	0	0	0	0	0	0	0	0	3.86	1.29	0	0	0	0	0	0	0	0	--	--	--	--	--	--	--	--	--	--	--	--
c89586.graph_c0	0	0	0	0	0	0	0	0	0	0	0	0	0	0	0	0	0	0	0	0	0	0	0	0	0	0	0	0	--	--	--	--	--	--	--	--	--	--	--	--
c94362.graph_c0	0	0	0	0	0	0	0	0	0	0	0	0	0	0	0	0	0	0	0	0	0	0	0	0	1.14	0	0	0.38	--	--	--	--	--	--	--	--	--	--	--	--
c20457.graph_c0	0	0	0.46	0.15	0	0	0	0	0	0	0	0	0	0	0	0	0	0	0	0	0	0.44	0.46	0.93	0	0	0	0	--	--	--	--	--	--	--	--	--	--	--	--
c69384.graph_c0	3.43	2.79	5.2	3.81	4.26	4.18	4.62	4.35	3.27	3	3.97	3.41	3.89	3.48	2.72	3.36	2.31	3.27	2.82	2.8	4.1	5.1	4.04	2.93	2.8	3.51	2.87	3.06	--	Biological Process: reproduction (GO:0000003);; Cellular Component: ubiquitin ligase complex (GO:0000151);; Biological Process: response to acid chemical (GO:0001101);; Biological Process: activation of innate immune response (GO:0002218);; Biological Process: immune effector process (GO:0002252);; Biological Process: activation of immune response (GO:0002253);; Biological Process: immune system …	K14508|1.9e-125|sind:105159880|K14508 regulatory protein NPR1 | (RefSeq) regulatory protein NPR5-like	General function prediction only	Domain of unknown function (DUF3420);; Ankyrin repeats (3 copies);; Ankyrin repeat;; Ankyrin repeat;; Ankyrin repeats (many copies);; Ankyrin repeats (many copies)	BTB/POZ domain and ankyrin repeat-containing protein NOOT1 OS=Medicago truncatula OX=3880 GN=NOOT1 PE=2 SV=1	Regulatory protein NPR1 OS=Salvia splendens OX=180675 GN=NPR1 PE=4 SV=1	Function unknown	regulatory protein NPR1 [Salvia splendens]	biological process: reproduction (GO:0000003);; cellular component: cell (GO:0005623);; cellular component: macromolecular complex (GO:0032991);; cellular component: cell part (GO:0044464);; biological process: response to stimulus (GO:0050896);; biological process: immune system process (GO:0002376);; biological process: biological regulation (GO:0065007);; biological process: multicellular orga…	Plant hormone signal transduction (ko04075)	--
c82190.graph_c0	8.83	8.72	9.09	8.88	6.56	2.61	5.31	4.83	7.93	5.23	3.72	5.63	5.78	6.25	7.36	6.46	9.71	8.22	6.42	8.12	9.1	8.67	8.38	7.37	8.09	13.47	10.41	10.66	--	Molecular Function: molecular_function (GO:0003674);; Molecular Function: nucleic acid binding (GO:0003676);; Molecular Function: RNA binding (GO:0003723);; Molecular Function: catalytic activity (GO:0003824);; Molecular Function: nuclease activity (GO:0004518);; Molecular Function: endonuclease activity (GO:0004519);; Molecular Function: binding (GO:0005488);; Cellular Component: cellular_compon…	--	General function prediction only	PPR repeat;; PPR repeat family;; Pentatricopeptide repeat domain;; Pentacotripeptide-repeat region of PRORP;; PPR repeat	Pentatricopeptide repeat-containing protein At1g60770 OS=Arabidopsis thaliana OX=3702 GN=At1g60770 PE=1 SV=1	Uncharacterized protein OS=Salvia splendens OX=180675 GN=Saspl_032853 PE=4 SV=1	Function unknown	hypothetical protein Saspl_032853 [Salvia splendens]	molecular function: binding (GO:0005488);; molecular function: catalytic activity (GO:0003824);; biological process: metabolic process (GO:0008152);; biological process: cellular process (GO:0009987);; cellular component: cell (GO:0005623);; cellular component: cell part (GO:0044464);; cellular component: organelle (GO:0043226)	--	--
c86541.graph_c0	0.86	0.4	1.21	0.82	5.43	0.98	3.19	3.2	2.16	2.5	2.01	2.22	0.38	1.24	1.46	1.03	0	0.35	0	0.12	1.62	2.28	1.71	1.22	0.76	2.11	1.17	1.35	--	Biological Process: immune system process (GO:0002376);; Cellular Component: cellular_component (GO:0005575);; Cellular Component: intracellular (GO:0005622);; Cellular Component: obsolete cell (GO:0005623);; Cellular Component: cytoplasm (GO:0005737);; Cellular Component: plasma membrane (GO:0005886);; Biological Process: response to stress (GO:0006950);; Biological Process: defense response (GO…	--	--	--	--	NB-ARC domain-containing protein OS=Erythranthe guttata OX=4155 GN=MIMGU_mgv1a018432mg PE=4 SV=1	Signal transduction mechanisms	PREDICTED: putative late blight resistance protein homolog R1A-3 [Erythranthe guttata]	biological process: immune system process (GO:0002376);; cellular component: cell (GO:0005623);; cellular component: cell part (GO:0044464);; cellular component: membrane (GO:0016020);; biological process: response to stimulus (GO:0050896);; biological process: cellular process (GO:0009987);; biological process: signaling (GO:0023052);; biological process: single-organism process (GO:0044699);; b…	--	--
c34935.graph_c0	0	0	0	0	0	0	0	0	0	0	0	0	0	0	0	0	0	0	0	0	0	0	0	0	0	0	0	0	--	--	--	--	--	--	--	--	--	--	--	--
c80505.graph_c0	149.09	163.64	138.18	150.3	131.79	131.41	142.09	135.1	158.8	177.46	139.06	158.44	193	215.22	202.43	203.55	110.84	120.08	109.65	113.52	151.1	146.7	150.9	154.91	153.22	143.38	154.36	150.32	--	Molecular Function: ATPase activator activity (GO:0001671);; Molecular Function: chaperone binding (GO:0051087);; Molecular Function: Hsp90 protein binding (GO:0051879);;	--	Function unknown	Activator of Hsp90 ATPase, N-terminal	--	Aha1_N domain-containing protein OS=Salvia splendens OX=180675 GN=Saspl_016904 PE=3 SV=1	Posttranslational modification, protein turnover, chaperones	hypothetical protein Saspl_016904 [Salvia splendens]	molecular function: molecular function regulator (GO:0098772);; biological process: biological regulation (GO:0065007);; molecular function: binding (GO:0005488)	--	--
c65621.graph_c0	5.8	5.2	6.49	5.83	11.25	7.43	8.64	9.11	10.12	8.17	11.01	9.77	12.18	10.43	8.95	10.52	8.05	8.09	7.63	7.92	9.42	10.55	9.8	9.43	10.03	12.4	13.34	11.92	--	--	--	--	--	--	--	--	--	--	--	--
c107041.graph_c0	0	0	0	0	0	0	0	0	0	0	0	0	0	0	0	0	0	1.08	0	0.36	0	0	0	0	0	1.34	0	0.45	--	--	--	--	--	--	--	--	--	--	--	--
c67794.graph_c0	0.25	0	0.34	0.2	0.67	0.11	0.23	0.34	0.63	0.68	0.48	0.6	0.19	0.13	0.59	0.3	0	0.58	0.38	0.32	0.56	0.43	0.47	0.42	0.11	0.29	0.34	0.25	Nucleotide transport and metabolism	Cellular Component: integral component of membrane (GO:0016021);; Molecular Function: transmembrane transporter activity (GO:0022857);;	K14611|8.7e-79|nau:109231653|K14611 solute carrier family 23 (nucleobase transporter), member 1 | (RefSeq) nucleobase-ascorbate transporter 6	Nucleotide transport and metabolism	Permease family	Putative nucleobase-ascorbate transporter 10 OS=Arabidopsis thaliana OX=3702 GN=NAT10 PE=3 SV=2	Uncharacterized protein OS=Salvia splendens OX=180675 GN=Saspl_009743 PE=4 SV=1	Nucleotide transport and metabolism	hypothetical protein Saspl_009743 [Salvia splendens]	cellular component: membrane (GO:0016020);; cellular component: membrane part (GO:0044425);; molecular function: transporter activity (GO:0005215);; biological process: localization (GO:0051179)	--	--
c112410.graph_c0	0	0	0	0	0	0	0	0	0	0	0	0	0	0	0	0	0	0	0	0	0	0	0	0	0	0	0	0	--	--	--	--	--	--	--	--	--	--	--	--
c44336.graph_c0	2.09	0	0	0.7	0	0.62	0	0.21	0	0	0	0	0	0	0	0	1.07	0.42	0	0.5	0	1.85	2.42	5.4	5.09	0	0	1.7	--	Molecular Function: L-lactate dehydrogenase activity (GO:0004459);; Cellular Component: peroxisome (GO:0005777);; Molecular Function: glycolate oxidase activity (GO:0008891);; Molecular Function: FMN binding (GO:0010181);; Biological Process: lactate oxidation (GO:0019516);;	K11517|6.2e-55|sly:544106|K11517 (S)-2-hydroxy-acid oxidase [EC:1.1.3.15] | (RefSeq) peroxisomal (S)-2-hydroxy-acid oxidase GLO1	Energy production and conversion	FMN-dependent dehydrogenase	(S)-2-hydroxy-acid oxidase GLO2 OS=Arabidopsis thaliana OX=3702 GN=GLO2 PE=1 SV=1	(S)-2-hydroxy-acid oxidase OS=Erythranthe guttata OX=4155 GN=MIMGU_mgv1a008544mg PE=3 SV=1	Energy production and conversion	PREDICTED: peroxisomal (S)-2-hydroxy-acid oxidase GLO1-like [Erythranthe guttata]	molecular function: catalytic activity (GO:0003824);; biological process: metabolic process (GO:0008152);; biological process: single-organism process (GO:0044699);; cellular component: cell (GO:0005623);; cellular component: organelle (GO:0043226);; cellular component: cell part (GO:0044464);; molecular function: binding (GO:0005488);; biological process: cellular process (GO:0009987)	Glyoxylate and dicarboxylate metabolism (ko00630);; Carbon metabolism (ko01200);; Peroxisome (ko04146)	LOC105957108
c39540.graph_c0	0	0	0	0	0	0	0	0	0	0	0	0	0	0	0	0	0	0	0	0	0	0	0	0	0	0	0	0	--	--	--	--	--	--	--	--	--	--	--	--
c89203.graph_c0	0	0	0	0	0	0	0	0	0	0	0	0	0	0	0	0	0	0	0	0	0	0	0	0	2.48	0	0	0.83	Lipid transport and metabolism	Molecular Function: lanosterol synthase activity (GO:0000250);; Cellular Component: lipid droplet (GO:0005811);; Biological Process: triterpenoid biosynthetic process (GO:0016104);; Molecular Function: beta-amyrin synthase activity (GO:0042300);;	K20659|9.9e-40|lsv:111880217|K20659 lupeol synthase [EC:5.4.99.41] | (RefSeq) lupeol synthase-like	Lipid transport and metabolism	Squalene-hopene cyclase C-terminal domain;; Prenyltransferase and squalene oxidase repeat	Lupeol synthase OS=Glycyrrhiza glabra OX=49827 GN=LUS1 PE=1 SV=1	Terpene cyclase/mutase family member OS=Davidia involucrata OX=16924 GN=Din_036658 PE=3 SV=1	Lipid transport and metabolism	lupeol synthase [Taraxacum kok-saghyz]	molecular function: catalytic activity (GO:0003824);; cellular component: cell (GO:0005623);; cellular component: organelle (GO:0043226);; cellular component: cell part (GO:0044464);; biological process: metabolic process (GO:0008152);; biological process: cellular process (GO:0009987);; biological process: single-organism process (GO:0044699)	Sesquiterpenoid and triterpenoid biosynthesis (ko00909)	--
c1345.graph_c0	0	0.86	0	0.29	0	0	0.69	0.23	1.26	0	0	0.42	0	0	0	0	0.22	0	0	0.07	0	0	0	0	0	0.3	0	0.1	--	--	--	--	--	--	--	--	--	--	--	--
c51079.graph_c0	0	0	0	0	0	0	0	0	0	0	0	0	0	0	0	0	0	0	0	0	0	0	0	0	0	0	0	0	--	Biological Process: defense response (GO:0006952);; Molecular Function: ADP binding (GO:0043531);;	K13457|6.5e-06|mdm:103439672|K13457 disease resistance protein RPM1 | (RefSeq) disease resistance protein RPM1-like	Signal transduction mechanisms	NB-ARC domain	Probable disease resistance protein At1g59620 OS=Arabidopsis thaliana OX=3702 GN=At1g59620 PE=2 SV=3	Uncharacterized protein OS=Erythranthe guttata OX=4155 GN=MIMGU_mgv1a018451mg PE=4 SV=1	--	PREDICTED: putative late blight resistance protein homolog R1B-17 isoform X2 [Ipomoea nil]	biological process: response to stimulus (GO:0050896);; molecular function: binding (GO:0005488)	Plant-pathogen interaction (ko04626)	LOC109170759
c67916.graph_c0	3.77	1.43	2.97	2.72	1.76	2.15	1.87	1.93	1.8	1.95	4.89	2.88	3.13	5.68	8.02	5.61	5.09	4.01	3.13	4.08	3.65	3.71	3.84	4.17	8.28	6.84	12.69	9.27	--	--	--	--	--	--	Uncharacterized protein OS=Salvia splendens OX=180675 GN=Saspl_034417 PE=4 SV=1	--	hypothetical protein Saspl_034417 [Salvia splendens]	--	--	--
c3371.graph_c0	0	0	0	0	0	0	0	0	0	0	0	0	0	0	0	0	0	1.67	0	0.56	0	0	0	0	0	2.05	0	0.68	Energy production and conversion	Molecular Function: pyruvate carboxylase activity (GO:0004736);; Molecular Function: ATP binding (GO:0005524);; Biological Process: pyruvate metabolic process (GO:0006090);; Biological Process: gluconeogenesis (GO:0006094);; Molecular Function: biotin binding (GO:0009374);; Molecular Function: metal ion binding (GO:0046872);;	K01958|2.8e-39|ota:OT_ostta08g00980|K01958 pyruvate carboxylase [EC:6.4.1.1] | (RefSeq) Rudiment single hybrid motif	Energy production and conversion	Carbamoyl-phosphate synthase L chain, ATP binding domain;; D-ala D-ala ligase C-terminus;; ATP-grasp domain	Methylcrotonoyl-CoA carboxylase subunit alpha, mitochondrial OS=Glycine max OX=3847 GN=MCCA PE=1 SV=2	Pyruvate carboxylase OS=Ostreococcus tauri OX=70448 GN=BE221DRAFT_191341 PE=4 SV=1	Energy production and conversion	pyruvate carboxylase, mitochondrial-like [Rhodamnia argentea]	molecular function: catalytic activity (GO:0003824);; molecular function: binding (GO:0005488);; biological process: metabolic process (GO:0008152);; biological process: cellular process (GO:0009987);; biological process: single-organism process (GO:0044699)	Citrate cycle (TCA cycle) (ko00020);; Pyruvate metabolism (ko00620);; Carbon metabolism (ko01200);; Biosynthesis of amino acids (ko01230)	--
c51824.graph_c0	0	0	0	0	0	0	0	0	0	0	0	0	0	0	0	0	0	0	0	0	0	0	0	0	0.75	0	0	0.25	--	--	--	--	--	--	--	--	--	--	--	--
c106848.graph_c0	0	0	0	0	0	0	4.44	1.48	0	0	0	0	0	0	0	0	0	0	0	0	0	0	0	0	0	0	0	0	--	--	--	--	--	--	--	--	--	--	--	--
c52820.graph_c0	0	0.3	0.6	0.3	0	0	0.89	0.3	0	0	0.3	0.1	0	0	0	0	0.23	0	0	0.08	0	0.85	0.28	0	0	0	0.29	0.1	--	--	--	--	--	--	--	--	--	--	--	--
c109940.graph_c0	0	0	0	0	0	0	0	0	0	1.53	0	0.51	0	0	0	0	0	0	0	0	0	0	0	0	0	0	0	0	Inorganic ion transport and metabolism	Molecular Function: catalase activity (GO:0004096);; Molecular Function: heme binding (GO:0020037);; Biological Process: oxidation-reduction process (GO:0055114);;	K03781|8.6e-59|aof:109837240|K03781 catalase [EC:1.11.1.6] | (RefSeq) catalase isozyme 1-like	Inorganic ion transport and metabolism	Catalase	Catalase isozyme 1 OS=Gossypium hirsutum OX=3635 GN=CAT1 PE=2 SV=2	Catalase OS=Hibiscus syriacus OX=106335 GN=F3Y22_tig00110462pilonHSYRG00150 PE=3 SV=1	Inorganic ion transport and metabolism	PREDICTED: catalase-2-like [Raphanus sativus]	molecular function: catalytic activity (GO:0003824);; molecular function: antioxidant activity (GO:0016209);; biological process: metabolic process (GO:0008152);; biological process: cellular process (GO:0009987);; biological process: single-organism process (GO:0044699);; biological process: response to stimulus (GO:0050896);; biological process: detoxification (GO:0098754);; molecular function:…	Tryptophan metabolism (ko00380);; Glyoxylate and dicarboxylate metabolism (ko00630);; Carbon metabolism (ko01200);; MAPK signaling pathway - plant (ko04016);; Peroxisome (ko04146)	LOC108840848
c22674.graph_c0	0	0	0	0	0	0	0	0	0	0	0	0	0	0	0	0	0	1.54	0	0.51	0	0	0	0	0	0	0	0	--	--	--	Cytoskeleton	Actin	--	--	--	actin family [Absidia repens]	--	--	--
c103081.graph_c0	0	0	0	0	0.98	0	0	0.33	0	0	0	0	0	0	0	0	0	0	0	0	0	0.72	0.24	0	0	0	0	0	--	--	--	--	Eukaryotic translation initiation factor 3 subunit 8 N-terminus	--	--	--	--	--	--	--
c45661.graph_c1	0	0.57	0	0.19	0	0.42	0.19	0.2	0.51	0	0	0.17	0	0	0.18	0.06	0	0	0.32	0.11	0	0	0	0	0	0.39	0.37	0.25	--	Cellular Component: integral component of membrane (GO:0016021);;	--	--	C2 domain	FT-interacting protein 7 OS=Oryza sativa subsp. japonica OX=39947 GN=FTIP7 PE=1 SV=1	Uncharacterized protein OS=Handroanthus impetiginosus OX=429701 GN=CDL12_03735 PE=3 SV=1	Function unknown	FT-interacting protein 1-like [Sesamum indicum]	cellular component: membrane (GO:0016020);; cellular component: membrane part (GO:0044425)	--	LOC105163546
c103859.graph_c0	0	4.15	0	1.38	0	0	0	0	0	0	0	0	0	0	0	0	0	0	0	0	0	0	0	0	0	0	0	0	--	--	--	--	--	--	--	--	--	--	--	--
c47113.graph_c1	0	0	0.84	0.28	0	0	0	0	0	0	0	0	0	0.54	0	0.18	0	0	0.47	0.16	0	0	0.1	0.29	0.13	0	0.82	0.32	Lipid transport and metabolism	--	--	--	Alpha/beta hydrolase family	--	AB hydrolase-1 domain-containing protein OS=Carpinus fangiana OX=176857 GN=FH972_023044 PE=4 SV=1	--	hypothetical protein PaG_02388 [Moesziomyces aphidis DSM 70725]	--	--	--
c106010.graph_c0	0	0	0	0	0	0	0	0	0	0	0	0	0	0	0	0	0	0.98	0.62	0.53	0	0	0	0	0	0	0	0	--	--	--	Extracellular structures	Disintegrin;; Membrane-proximal domain, switch, for ADAM17	--	--	--	Zinc metalloprotease [Rhodotorula toruloides ATCC 204091]	--	--	--
c105717.graph_c0	0	0	0	0	0	0	0	0	0	0	0	0	0	0	0	0	0	3.4	0	1.13	0	0	0	0	0	0	0	0	--	--	--	--	--	--	Uncharacterized protein OS=Camellia sinensis var. sinensis OX=542762 GN=TEA_003868 PE=4 SV=1	--	uncharacterized protein LOC114259552 [Camellia sinensis]	--	--	LOC114259552
c84590.graph_c1	23.97	23.33	28.33	25.21	22.63	18.86	18.93	20.14	17.6	20.56	19.25	19.14	26.39	15.6	22.8	21.6	22.55	16.99	30.16	23.23	25.47	24.38	23.58	20.9	20.51	17.42	18.38	18.77	--	Molecular Function: protein binding (GO:0005515);;	K20241|1.9e-69|egu:105052050|K20241 WD repeat-containing protein 44 | (RefSeq) lissencephaly-1 homolog 1-like	Function unknown	WD domain, G-beta repeat	--	WD_REPEATS_REGION domain-containing protein OS=Salvia splendens OX=180675 GN=Saspl_011237 PE=4 SV=1	Function unknown	hypothetical protein Saspl_011237 [Salvia splendens]	molecular function: binding (GO:0005488)	--	--
c41071.graph_c0	0	0.18	0.18	0.12	0.52	0.39	0	0.3	0.48	0.49	0.19	0.39	0	0	0.17	0.06	0.14	0.48	0.61	0.41	0.37	0.51	0.29	0	0.51	1.12	0	0.54	--	--	--	--	--	--	--	--	--	--	--	--
c17323.graph_c1	0	0	0	0	0	0	0	0	0	0	0	0	0	0	0	0	0	0.93	0	0.31	0	0.68	0.23	0	0	0	0	0	--	Cellular Component: cellular_component (GO:0005575);; Cellular Component: intracellular (GO:0005622);; Cellular Component: obsolete cell (GO:0005623);; Cellular Component: cytoplasm (GO:0005737);; Cellular Component: obsolete intracellular part (GO:0044424);; Cellular Component: obsolete cell part (GO:0044464);;	K19042|5.4e-50|ini:109149387|K19042 E3 ubiquitin-protein ligase BOI and related proteins [EC:2.3.2.27] | (RefSeq) probable BOI-related E3 ubiquitin-protein ligase 2	Posttranslational modification, protein turnover, chaperones	--	--	Uncharacterized protein OS=Camellia sinensis var. sinensis OX=542762 GN=TEA_028316 PE=4 SV=1	Posttranslational modification, protein turnover, chaperones	hypothetical protein TEA_028316 [Camellia sinensis var. sinensis]	cellular component: cell (GO:0005623);; cellular component: cell part (GO:0044464)	--	--
c77581.graph_c0	10.3	13.57	14.29	12.72	10.84	7.83	12.86	10.51	10.07	14.72	14.21	13	15.84	8.48	17.84	14.05	9.92	9.92	16.96	12.27	11.09	11.88	11.28	10.86	13.39	9.89	8.48	10.59	--	--	--	--	--	--	--	--	--	--	--	--
c57702.graph_c0	0	0	0	0	0	0	0	0	0	0	0	0	0	0	0	0	0	0	0	0	2.53	0	0.84	0	0	0	0	0	--	Biological Process: reproduction (GO:0000003);; Biological Process: developmental process involved in reproduction (GO:0003006);; Molecular Function: molecular_function (GO:0003674);; Molecular Function: nucleic acid binding (GO:0003676);; Molecular Function: RNA binding (GO:0003723);; Molecular Function: catalytic activity (GO:0003824);; Molecular Function: nuclease activity (GO:0004518);; Molec…	--	General function prediction only	--	Pentatricopeptide repeat-containing protein At3g18110, chloroplastic OS=Arabidopsis thaliana OX=3702 GN=EMB1270 PE=2 SV=2	Pentatricopeptide repeat protein OS=Salvia miltiorrhiza OX=226208 PE=2 SV=1	Function unknown	pentatricopeptide repeat protein [Salvia miltiorrhiza]	biological process: reproduction (GO:0000003);; biological process: reproductive process (GO:0022414);; biological process: developmental process (GO:0032502);; molecular function: binding (GO:0005488);; molecular function: catalytic activity (GO:0003824);; biological process: metabolic process (GO:0008152);; biological process: cellular process (GO:0009987);; cellular component: cell (GO:0005623…	--	--
c103591.graph_c0	0	0	0	0	0	0	0	0	0	0	1.33	0.44	0	0	0	0	0	3.58	0	1.19	0	0	0	0	0	0	0	0	--	--	--	--	--	--	--	--	--	--	--	--
c65741.graph_c2	0	0	0	0	0	0	0	0	0	0	0	0	0	0	0	0	0	0	0	0	0	0	0	0	0	0	0	0	--	--	--	--	--	--	--	--	--	--	--	--
c108241.graph_c0	0	0	0	0	0	0	0	0	0	0	0	0	0	0	0	0	0	0	0	0	0	0	0	0	0	0	0	0	--	Molecular Function: RNA binding (GO:0003723);; Cellular Component: nucleus (GO:0005634);; Biological Process: RNA processing (GO:0006396);; Cellular Component: ribonucleoprotein complex (GO:1990904);;	K15191|1.8e-25|vvi:100259405|K15191 La-related protein 7 | (RefSeq) la-related protein 6B	General function prediction only	--	La-related protein 6B OS=Arabidopsis thaliana OX=3702 GN=LARP6B PE=1 SV=2	Putative la-related protein 6B (Fragment) OS=Davidia involucrata OX=16924 GN=Din_011413 PE=4 SV=1	--	la-related protein 6B [Camellia sinensis]	molecular function: binding (GO:0005488);; cellular component: cell (GO:0005623);; cellular component: organelle (GO:0043226);; cellular component: cell part (GO:0044464);; biological process: metabolic process (GO:0008152);; biological process: cellular process (GO:0009987);; cellular component: macromolecular complex (GO:0032991)	--	--
c71552.graph_c0	0.86	1.33	2.22	1.47	1.31	0.97	1.95	1.41	1.68	1.59	1	1.42	1.39	1.21	1.22	1.27	1.45	2.66	1.86	1.99	1.61	2.63	2.55	3.42	1.69	2.47	0.77	1.64	--	Cellular Component: integral component of membrane (GO:0016021);;	--	--	--	--	Uncharacterized protein OS=Salvia splendens OX=180675 GN=Saspl_038815 PE=4 SV=1	--	hypothetical protein Saspl_038815 [Salvia splendens]	cellular component: membrane (GO:0016020);; cellular component: membrane part (GO:0044425)	--	--
c93213.graph_c0	0	0	0	0	0	0	0	0	0	0	1.18	0.39	1.14	1.5	0	0.88	1.67	0	0	0.56	0	0	0	0	0	0	0	0	--	--	--	--	--	--	--	--	--	--	--	--
c58019.graph_c1	0	0	0	0	0.15	0	0	0.05	0.27	0.14	0	0.14	0.15	0	0.14	0.1	0.12	0	0.13	0.08	0	0.14	0.1	0.16	4.23	0.16	0.44	1.61	--	Molecular Function: protein kinase activity (GO:0004672);; Molecular Function: ATP binding (GO:0005524);; Molecular Function: metal ion binding (GO:0046872);;	--	General function prediction only	--	Probable plastid-lipid-associated protein 14, chloroplastic OS=Arabidopsis thaliana OX=3702 GN=PAP14 PE=1 SV=1	Uncharacterized protein OS=Salvia splendens OX=180675 GN=Saspl_026488 PE=4 SV=1	Carbohydrate transport and metabolism	hypothetical protein Saspl_026488 [Salvia splendens]	molecular function: catalytic activity (GO:0003824);; biological process: metabolic process (GO:0008152);; biological process: cellular process (GO:0009987);; molecular function: binding (GO:0005488)	--	--
c87177.graph_c0	0	0	0	0	0	0	1.26	0.42	0	0	0	0	0	0	0	0	0	0	0	0	0	1.23	0.41	0	0	0	0	0	--	--	--	--	--	--	--	--	--	--	--	--
c78223.graph_c0	29.84	31.49	40	33.78	31.29	30.97	42.82	35.03	42.54	37.43	33.92	37.96	42.63	39.45	38.96	40.35	44.45	49.29	63.35	52.36	56.12	68.66	59.32	53.19	60.09	53.72	49.63	54.48	--	Biological Process: defense response (GO:0006952);; Molecular Function: ADP binding (GO:0043531);;	K13457|4.4e-31|jre:108983762|K13457 disease resistance protein RPM1 | (RefSeq) disease resistance protein RPM1-like	Signal transduction mechanisms	--	Disease resistance RPP8-like protein 3 OS=Arabidopsis thaliana OX=3702 GN=RPP8L3 PE=2 SV=1	Uncharacterized protein OS=Salvia splendens OX=180675 GN=Saspl_016355 PE=4 SV=1	Signal transduction mechanisms	hypothetical protein Saspl_016355 [Salvia splendens]	biological process: response to stimulus (GO:0050896);; molecular function: binding (GO:0005488)	Plant-pathogen interaction (ko04626)	--
c67850.graph_c0	7.54	3.16	6.13	5.61	7.38	3.82	10.47	7.22	8.9	6.48	12.23	9.2	15.94	10.02	11.44	12.47	21.79	20.55	21.04	21.13	29.1	20.83	23.74	21.3	20.7	31.46	24.95	25.7	--	Molecular Function: enzyme inhibitor activity (GO:0004857);;	K01051|6.1e-16|ppp:112278953|K01051 pectinesterase [EC:3.1.1.11] | (RefSeq) pectinesterase-like	--	Plant invertase/pectin methylesterase inhibitor	Pectinesterase inhibitor 6 OS=Arabidopsis thaliana OX=3702 GN=PMEI6 PE=2 SV=1	PMEI domain-containing protein OS=Salvia splendens OX=180675 GN=Saspl_018963 PE=4 SV=1	Function unknown	hypothetical protein Saspl_018963 [Salvia splendens]	molecular function: molecular function regulator (GO:0098772);; biological process: biological regulation (GO:0065007)	Pentose and glucuronate interconversions (ko00040)	--
c105392.graph_c0	2.95	0	0	0.98	0	0	0	0	0	0	0	0	0	0	0	0	0	0.78	0	0.26	0	0	0	0	0	0	0	0	--	--	--	--	--	--	--	--	--	--	--	--
c68001.graph_c0	5.18	4.78	5.19	5.05	4.71	5.39	5.43	5.18	4.47	6.71	5.18	5.45	5.7	8.64	5.92	6.75	5.07	8.09	5.44	6.2	6.13	4.9	6.1	7.26	6.17	8.46	4.57	6.4	--	--	--	--	--	--	--	--	--	--	--	--
c33.graph_c0	0	0	0	0	0	0	0	0	0	2.59	0	0.86	0	0	0	0	0	0	0	0	0	0	0	0	0	0	0	0	--	--	--	--	--	--	--	--	--	--	--	--
c27519.graph_c0	0	0	0	0	0	0.32	0	0.11	0	0	0	0	0.15	0	0.42	0.19	0	0	0.13	0.04	0.15	0	0.05	0	0	0	0.59	0.2	--	--	--	--	--	--	--	--	--	--	--	--
c114167.graph_c0	0	0	0	0	0	0	0	0	0	0	0	0	0	0	0	0	0	0	0	0	0	1.01	0.34	0	0	1.16	0	0.39	--	--	K14839|3.0e-30|ini:109160236|K14839 nucleolar protein 16 | (RefSeq) nucleolar protein 16	Translation, ribosomal structure and biogenesis	Ribosome biogenesis protein Nop16	--	Nucleolar protein 16 OS=Carpinus fangiana OX=176857 GN=FH972_005931 PE=3 SV=1	Translation, ribosomal structure and biogenesis	hypothetical protein FH972_005931 [Carpinus fangiana]	--	--	--
c1261.graph_c0	0	0	0	0	0	0	0	0	0	0	0	0	0	0	0	0	0	0.62	0	0.21	0	0	0	0	0.34	0.37	0	0.24	Translation, ribosomal structure and biogenesis	Molecular Function: structural constituent of ribosome (GO:0003735);; Cellular Component: ribosome (GO:0005840);; Biological Process: translation (GO:0006412);;	K02866|1.3e-43|qsu:112037786|K02866 large subunit ribosomal protein L10e | (RefSeq) 60S ribosomal protein L10-A-like	Translation, ribosomal structure and biogenesis	Ribosomal protein L16p/L10e	60S ribosomal protein L10-1 OS=Oryza sativa subsp. indica OX=39946 GN=SC34 PE=2 SV=2	60S ribosomal protein L10 OS=Anthurium amnicola OX=1678845 GN=RpL10_3 PE=3 SV=1	Translation, ribosomal structure and biogenesis	hypothetical protein PaG_05924 [Moesziomyces aphidis DSM 70725]	molecular function: structural molecule activity (GO:0005198);; cellular component: cell (GO:0005623);; cellular component: macromolecular complex (GO:0032991);; cellular component: organelle (GO:0043226);; cellular component: cell part (GO:0044464);; biological process: metabolic process (GO:0008152);; biological process: cellular process (GO:0009987)	Ribosome (ko03010)	--
c55739.graph_c0	0.48	1.11	0.45	0.68	0	0.12	0.45	0.19	0	0.3	0.23	0.18	0.11	0.22	0.31	0.21	0.18	0.79	0.57	0.51	0.57	0.42	0.41	0.23	0	1.61	0.33	0.65	--	--	--	--	--	--	--	--	--	--	--	--
c54079.graph_c2	0	0	0	0	0	0	0	0	0	0	0	0	0	0	0	0	0	0	0	0	0	0	0	0	0	0	0	0	--	--	--	--	--	--	--	--	--	--	--	--
c28404.graph_c0	0.93	0.43	0	0.45	0	0	0	0	0	0	0.87	0.29	0	0	0	0	0.32	0.75	0	0.36	0.44	0	0.15	0	0.82	0.46	0	0.43	--	--	--	--	--	--	--	--	--	--	--	--
c93488.graph_c0	0.45	0	0	0.15	0	0	0	0	0	2.27	0	0.76	0	0	0	0	0	0.37	0	0.12	0	0	0	0	0	0	0	0	Amino acid transport and metabolism	Molecular Function: L-aspartate:2-oxoglutarate aminotransferase activity (GO:0004069);; Biological Process: cellular amino acid metabolic process (GO:0006520);; Biological Process: biosynthetic process (GO:0009058);; Molecular Function: pyridoxal phosphate binding (GO:0030170);;	K14454|2.2e-58|mus:103980913|K14454 aspartate aminotransferase, cytoplasmic [EC:2.6.1.1] | (RefSeq) aspartate aminotransferase, cytoplasmic	Amino acid transport and metabolism	Aminotransferase class I and II	Aspartate aminotransferase 3, chloroplastic OS=Arabidopsis thaliana OX=3702 GN=ASP3 PE=1 SV=1	Aspartate aminotransferase OS=Musa acuminata subsp. malaccensis OX=214687 GN=103980913 PE=3 SV=1	Amino acid transport and metabolism	PREDICTED: aspartate aminotransferase, cytoplasmic [Musa acuminata subsp. malaccensis]	molecular function: catalytic activity (GO:0003824);; biological process: metabolic process (GO:0008152);; biological process: cellular process (GO:0009987);; biological process: single-organism process (GO:0044699);; molecular function: binding (GO:0005488)	Arginine biosynthesis (ko00220);; Alanine, aspartate and glutamate metabolism (ko00250);; Cysteine and methionine metabolism (ko00270);; Arginine and proline metabolism (ko00330);; Tyrosine metabolism (ko00350);; Phenylalanine metabolism (ko00360);; Phenylalanine, tyrosine and tryptophan biosynthesis (ko00400);; Carbon fixation in photosynthetic organisms (ko00710);; Isoquinoline alkaloid biosynt…	LOC103980913
c17089.graph_c0	0	0	0	0	0	0	1.75	0.58	0	0	0	0	0	0	0	0	0	0	0	0	0	0	0	0	0	0	0	0	--	Molecular Function: chromatin binding (GO:0003682);;	--	Chromatin structure and dynamics	BAH domain	--	--	--	--	molecular function: binding (GO:0005488)	--	--
c25461.graph_c0	0	0	0	0	0	0	0	0	0	0	0	0	0	0	0	0	0	0	0	0	1.05	0	0.35	0	0	0	0	0	--	Molecular Function: monooxygenase activity (GO:0004497);; Molecular Function: iron ion binding (GO:0005506);; Molecular Function: oxidoreductase activity, acting on paired donors, with incorporation or reduction of molecular oxygen (GO:0016705);; Molecular Function: heme binding (GO:0020037);;	K23807|7.6e-18|vra:111241839|K23807 cytochrome P450 family 71 subfamily D polypeptide 353 | (RefSeq) cytochrome P450 71AV8-like	Secondary metabolites biosynthesis, transport and catabolism	Cytochrome P450	Tabersonine 16-hydroxylase 1 OS=Catharanthus roseus OX=4058 GN=CYP71D12 PE=1 SV=2	Cytochrome P450 OS=Salvia miltiorrhiza OX=226208 PE=2 SV=1	Secondary metabolites biosynthesis, transport and catabolism	cytochrome P450 [Salvia miltiorrhiza]	molecular function: catalytic activity (GO:0003824);; biological process: metabolic process (GO:0008152);; biological process: single-organism process (GO:0044699);; molecular function: binding (GO:0005488)	--	--
c92398.graph_c0	0	0	0	0	0	0	0	0	0	0	0	0	0	8.31	0	2.77	0	0	0	0	0	0	0	0	0	0	0	0	--	--	--	--	--	--	--	--	--	--	--	--
c34580.graph_c0	0	0	0	0	0	0	0	0	0	0	0	0	0	0	0	0	0	0	0	0	0	0.82	0.27	0	0	0	0	0	--	--	--	--	--	--	--	--	--	--	--	--
c106947.graph_c0	0	0	0	0	0	0	0	0	0	0	0	0	0	0	0	0	0	0	0	0	0	0	0	0	0	0	0	0	--	--	--	--	--	--	--	--	--	--	--	--
c34635.graph_c0	0	0	0	0	0	0	0	0	0	0	0	0	0	0	0	0	0	0	0	0	0	0	0.72	2.15	2.05	0	0	0.68	--	Molecular Function: structural constituent of ribosome (GO:0003735);; Cellular Component: ribosome (GO:0005840);; Biological Process: translation (GO:0006412);;	K02902|5.5e-28|sind:105171756|K02902 large subunit ribosomal protein L28 | (RefSeq) 50S ribosomal protein L28, chloroplastic	--	--	50S ribosomal protein L28, chloroplastic OS=Spinacia oleracea OX=3562 GN=RPL28 PE=1 SV=2	Uncharacterized protein OS=Erythranthe guttata OX=4155 GN=MIMGU_mgv1a015614mg PE=3 SV=1	Translation, ribosomal structure and biogenesis	50S ribosomal protein L28, chloroplastic [Sesamum indicum]	molecular function: structural molecule activity (GO:0005198);; cellular component: cell (GO:0005623);; cellular component: macromolecular complex (GO:0032991);; cellular component: organelle (GO:0043226);; cellular component: cell part (GO:0044464);; biological process: metabolic process (GO:0008152);; biological process: cellular process (GO:0009987)	Ribosome (ko03010)	--
c101671.graph_c0	0	0	0	0	0	0	0	0	0	3.14	0	1.05	0	0	0	0	0	0	0	0	0	0	0	0	0	0	0	0	--	Molecular Function: RNA binding (GO:0003723);; Molecular Function: polynucleotide adenylyltransferase activity (GO:0004652);; Molecular Function: ATP binding (GO:0005524);; Cellular Component: nucleus (GO:0005634);; Biological Process: mRNA processing (GO:0006397);; Biological Process: RNA 3'-end processing (GO:0031123);; Biological Process: RNA polyadenylation (GO:0043631);; Molecular Function: …	K14376|2.8e-26|cic:CICLE_v10004938mg|K14376 poly(A) polymerase [EC:2.7.7.19] | (RefSeq) hypothetical protein	RNA processing and modification	--	Nuclear poly(A) polymerase 3 OS=Arabidopsis thaliana OX=3702 GN=PAPS3 PE=1 SV=1	Poly(A) polymerase OS=Acer yangbiense OX=1000413 GN=EZV62_000135 PE=3 SV=1	RNA processing and modification	hypothetical protein EZV62_000135 [Acer yangbiense]	molecular function: binding (GO:0005488);; molecular function: catalytic activity (GO:0003824);; cellular component: cell (GO:0005623);; cellular component: organelle (GO:0043226);; cellular component: cell part (GO:0044464);; biological process: metabolic process (GO:0008152);; biological process: cellular process (GO:0009987)	mRNA surveillance pathway (ko03015)	--
c53034.graph_c0	0	0	0	0	0	0	0	0	0	0	0	0	0	0	0	0	0	0	0	0	0	0	0	0	0	0	0	0	--	--	--	--	--	--	--	--	--	--	--	--
c52327.graph_c0	0	0	0	0	0	0	0	0	0	0	0	0	0	0	0	0	0	0	0	0	0	2.36	0.79	0	0	0	0	0	--	--	--	--	--	--	--	--	--	--	--	--
c2992.graph_c0	0	0	0	0	4.89	0	0	1.63	0	0	0	0	0	0	0	0	0	0	0	0	0	0	0	0	0	0	0	0	--	--	--	--	--	--	--	--	--	--	--	--
c88131.graph_c0	0.62	0.58	0	0.4	0.19	0	0.39	0.19	0	0	0	0	0.19	0	0.18	0.12	0	0.51	0.16	0.22	0.2	0.18	0.26	0.4	0.18	0.2	0.57	0.32	--	--	--	--	--	--	--	--	--	--	--	--
c63409.graph_c0	0	0	0	0	0	0	0	0	0	0	0	0	0	0	0.41	0.14	0	0	0	0	0	0	0	0	0	0	0	0	--	--	--	--	--	--	--	--	--	--	--	--
c108432.graph_c0	0	0	0	0	0	0	0	0	0	0	0	0	0	0	0	0	0	2.61	0	0.87	0	0	0	0	0	0	0	0	--	--	K03255|1.3e-30|vra:106774006|K03255 protein TIF31 | (RefSeq) protein TSS isoform X1	General function prediction only	Translation initiation factor eIF3 subunit 135	Protein TSS OS=Arabidopsis thaliana OX=3702 GN=TSS PE=1 SV=1	Protein TSS like OS=Actinidia chinensis var. chinensis OX=1590841 GN=CEY00_Acc29530 PE=4 SV=1	Function unknown	protein TSS [Camellia sinensis]	--	--	LOC114286418
c74905.graph_c1	0.96	0	0	0.32	1.31	0	0.89	0.73	1.62	0.4	1.35	1.12	1.7	0.47	3.26	1.81	1.32	0.77	1.84	1.31	1.82	2.56	1.76	0.91	1.28	1.42	1.31	1.34	--	--	--	--	--	--	--	--	--	--	--	--
c17142.graph_c0	0	0	0	0	0	0	0	0	0	0	0	0	0	2.59	0	0.86	0	0	0	0	0	0	0	0	0	0	0	0	--	Biological Process: cholesterol metabolic process (GO:0008203);; Biological Process: lipid catabolic process (GO:0016042);; Molecular Function: lipase activity (GO:0016298);; Molecular Function: hydrolase activity (GO:0016787);; Molecular Function: hormone-sensitive lipase activity (GO:0033878);;	--	Lipid transport and metabolism	alpha/beta hydrolase fold	--	Hormone-sensitive lipase OS=Galdieria sulphuraria OX=130081 GN=Gasu_23200 PE=3 SV=1	--	hypothetical protein SARC_06179 [Sphaeroforma arctica JP610]	biological process: metabolic process (GO:0008152);; biological process: single-organism process (GO:0044699);; molecular function: catalytic activity (GO:0003824)	--	SARC_06179
c59397.graph_c0	0	0	0	0	0	0	0	0	0	0	0	0	0.83	1.37	0	0.73	0	0	0	0	0	0	0	0	0	0	0	0	--	--	--	--	--	--	--	--	--	--	--	--
c80598.graph_c0	5.04	4.23	5.94	5.07	4.43	3.85	3.1	3.79	4.15	4.43	3.72	4.1	4.59	3.54	4.85	4.33	4.57	4.9	6.3	5.26	5.15	5.48	5.13	4.77	3.82	3.28	3.75	3.62	--	Molecular Function: peptide-N4-(N-acetyl-beta-glucosaminyl)asparagine amidase activity (GO:0000224);;	K03549|1.9e-16|cann:107865483|K03549 KUP system potassium uptake protein | (RefSeq) potassium transporter 5-like	--	Peptide N-acetyl-beta-D-glucosaminyl asparaginase amidase A	Peptide-N4-(N-acetyl-beta-glucosaminyl)asparagine amidase A OS=Prunus dulcis OX=3755 PE=1 SV=2	Peptide-N(4)-(N-acetyl-beta-glucosaminyl)asparagine amidase OS=Handroanthus impetiginosus OX=429701 GN=CDL12_15276 PE=4 SV=1	Function unknown	Peptide-N(4)-(N-acetyl-beta-glucosaminyl)asparagine amidase [Handroanthus impetiginosus]	molecular function: catalytic activity (GO:0003824)	--	--
c72760.graph_c0	10.82	9.64	11.61	10.69	12.34	9.69	10.38	10.8	11.32	11.61	10.81	11.25	9.28	11.54	11.68	10.83	14.54	14.52	12.67	13.91	14.36	12.94	13.63	13.59	14.59	16.12	13.08	14.6	Translation, ribosomal structure and biogenesis	Cellular Component: integral component of membrane (GO:0016021);; Molecular Function: transmembrane transporter activity (GO:0022857);;	K08150|6.2e-75|sind:105175744|K08150 MFS transporter, SP family, solute carrier family 2 (myo-inositol transporter), member 13 | (RefSeq) probable inositol transporter 2 isoform X1	General function prediction only	Sugar (and other) transporter;; Sugar (and other) transporter;; Ribosomal protein L14p/L23e	Probable inositol transporter 2 OS=Arabidopsis thaliana OX=3702 GN=INT2 PE=1 SV=1	MFS transporter, SP family, solute carrier family 2 (Myo-inositol transporter), member 13 OS=Salvia splendens OX=180675 GN=SLC2A13 PE=3 SV=1	Intracellular trafficking, secretion, and vesicular transport	MFS transporter, SP family, solute carrier family 2 (myo-inositol transporter), member 13 [Salvia splendens]	cellular component: membrane (GO:0016020);; cellular component: membrane part (GO:0044425);; molecular function: transporter activity (GO:0005215);; biological process: localization (GO:0051179)	--	--
c40440.graph_c0	0	0	0	0	0	0	0	0	0	0	0	0	0	0	0	0	0	0	0	0	0	0	0	0	0	0	0	0	--	--	--	--	--	--	--	--	--	--	--	--
c110264.graph_c0	0	0	0	0	0	0	0	0	0	0	0	0	0	0	0	0	0	0	0	0	0	0	0	0	0	0	0	0	--	Cellular Component: integral component of membrane (GO:0016021);;	--	--	--	--	CRIB domain-containing protein (Fragment) OS=Aquilegia coerulea OX=218851 GN=AQUCO_05800120v1 PE=4 SV=1	Function unknown	hypothetical protein AQUCO_05800120v1, partial [Aquilegia coerulea]	cellular component: membrane (GO:0016020);; cellular component: membrane part (GO:0044425)	--	--
c97808.graph_c0	0	0	0	0	0	0	0	0	0	0	0	0	0	0	0	0	0	0	0	0	0	0	0	0	0	0	0	0	--	--	--	--	--	--	--	--	--	--	--	--
c90211.graph_c0	0	0	0	0	0	0	0	0	0	0	0	0	0	0	0	0	0	0	0	0	0	0	0	0	0	0	0	0	--	--	--	--	--	--	--	--	--	--	--	--
c60794.graph_c3	0	0	0.84	0.28	1.21	0	0.42	0.54	2.25	0.75	0	1	0	0	0.38	0.13	0.31	0.36	0	0.22	0	1.59	0.81	0.84	0	0	0	0	--	Molecular Function: nucleic acid binding (GO:0003676);; Molecular Function: zinc ion binding (GO:0008270);; Biological Process: DNA integration (GO:0015074);;	K01147|1.2e-38|vra:106774033|K01147 exoribonuclease II [EC:3.1.13.1] | (RefSeq) uncharacterized protein LOC106774033	General function prediction only	Reverse transcriptase (RNA-dependent DNA polymerase)	Retrovirus-related Pol polyprotein from transposon RE1 OS=Arabidopsis thaliana OX=3702 GN=RE1 PE=2 SV=1	Polyprotein, putative OS=Solanum demissum OX=50514 GN=SDM1_42t00018 PE=4 SV=2	Transcription	Polyprotein, putative [Solanum demissum]	molecular function: binding (GO:0005488);; biological process: metabolic process (GO:0008152);; biological process: cellular process (GO:0009987)	--	--
c59630.graph_c0	0	0.31	0	0.1	0	0.24	0.1	0.11	0	0	0.1	0.03	0	0.22	0.09	0.1	1.56	0.08	0.26	0.63	0	0.56	0.34	0.45	0.49	0.78	0.19	0.49	--	--	--	--	--	--	--	--	--	--	--	--
c54396.graph_c0	0	0	0	0	0	0	0	0	0	0	0	0	0	0	0	0	0	0	0	0	0	0	0	0	0	0	0	0	--	--	--	--	--	--	--	--	--	--	--	--
c85116.graph_c1	31.68	27.92	29.64	29.75	33.45	29.56	30.12	31.04	43.44	33.28	34.69	37.14	32.53	38.05	37.82	36.13	29.04	30.13	31.48	30.22	33.02	39.8	36.27	36	34.99	27.57	33.7	32.09	--	--	K02218|4.4e-48|sbi:8069780|K02218 casein kinase 1 [EC:2.7.11.1] | (RefSeq) uncharacterized protein LOC8069780	Replication, recombination and repair	DDE superfamily endonuclease;; Plant transposon protein;; Transposase DDE domain	--	uncharacterized protein LOC104247567 isoform X2 OS=Nicotiana sylvestris OX=4096 GN=LOC104247567 PE=3 SV=1	Replication, recombination and repair	PREDICTED: putative nuclease HARBI1 [Erythranthe guttata]	--	--	LOC105960215
c62233.graph_c0	0.42	0.77	0	0.4	0.75	0	1.16	0.64	1.05	1.39	0.78	1.07	0	0.4	1.06	0.49	0.87	0.34	0.32	0.51	0.79	0	0.53	0.79	0	0.41	0	0.14	--	--	--	--	--	--	--	--	--	--	--	--
c74649.graph_c1	3.86	3.21	6.83	4.63	3.73	4.48	4.97	4.39	6.03	2.5	5.82	4.78	4.19	0.7	5.97	3.62	6.7	4.54	3.22	4.82	5.52	4.27	3.99	2.19	3.14	2.68	4.92	3.58	--	--	--	--	--	--	--	--	--	--	--	--
c74505.graph_c0	5.68	1.19	2.44	3.1	1.08	3.1	10.54	4.91	5.84	8.65	6.61	7.03	5.17	9.75	8.28	7.73	12.97	13.09	20.67	15.58	27.39	30.51	24.84	16.63	27.21	31.9	19.85	26.32	--	Biological Process: defense response to oomycetes (GO:0002229);; Molecular Function: transmembrane receptor protein serine/threonine kinase activity (GO:0004675);; Molecular Function: ATP binding (GO:0005524);; Cellular Component: plasma membrane (GO:0005886);; Biological Process: defense response (GO:0006952);; Cellular Component: integral component of membrane (GO:0016021);; Molecular Function:…	K22133|3.1e-76|egr:104443802|K22133 oxalate---CoA ligase [EC:6.2.1.8] | (RefSeq) oxalate--CoA ligase	--	Protein kinase domain;; Protein tyrosine and serine/threonine kinase	L-type lectin-domain containing receptor kinase IX.1 OS=Arabidopsis thaliana OX=3702 GN=LECRK91 PE=1 SV=1	Protein kinase domain-containing protein OS=Erythranthe guttata OX=4155 GN=MIMGU_mgv1a022316mg PE=3 SV=1	Signal transduction mechanisms	PREDICTED: L-type lectin-domain containing receptor kinase IX.1-like [Erythranthe guttata]	biological process: response to stimulus (GO:0050896);; biological process: multi-organism process (GO:0051704);; molecular function: catalytic activity (GO:0003824);; molecular function: signal transducer activity (GO:0004871);; molecular function: molecular transducer activity (GO:0060089);; biological process: metabolic process (GO:0008152);; biological process: cellular process (GO:0009987);;…	Glyoxylate and dicarboxylate metabolism (ko00630)	LOC105949645
c59560.graph_c0	0	0	0.8	0.27	0	0	0	0	0	0	0	0	0	0	0.64	0.21	0	0	0	0	0.24	0	0.08	0	0	0	0	0	--	--	--	--	--	--	--	--	--	--	--	--
c53196.graph_c0	0	0	1.84	0.61	0	1.77	0	0.59	0	0	0	0	0.35	0	0	0.12	0	0.32	0	0.11	0	1.38	0.46	0	0.34	0.38	0.36	0.36	--	--	--	--	--	--	--	--	--	--	--	--
c44829.graph_c0	0.36	0	0.68	0.35	0	0.8	2.34	1.05	2.1	0	8.15	3.42	0	0.34	0.31	0.22	2.02	11.64	4.73	6.13	1.02	0.64	1.35	2.39	0	1.41	0	0.47	Translation, ribosomal structure and biogenesis	Molecular Function: translation elongation factor activity (GO:0003746);; Molecular Function: GTPase activity (GO:0003924);; Molecular Function: GTP binding (GO:0005525);;	K03231|3.2e-29|gsl:Gasu_19840|K03231 elongation factor 1-alpha | (RefSeq) elongation factor EF-1 alpha subunit	Translation, ribosomal structure and biogenesis	Elongation factor Tu GTP binding domain	Elongation factor 1-alpha OS=Euglena gracilis OX=3039 GN=TEF PE=2 SV=1	Elongation factor 1-alpha (Fragment) OS=Noccaea caerulescens OX=107243 GN=LC_TR12158_c0_g1_i1_g.42271 PE=3 SV=1	Translation, ribosomal structure and biogenesis	hypothetical protein CVT26_002085 [Gymnopilus dilepis]	molecular function: binding (GO:0005488);; biological process: metabolic process (GO:0008152);; biological process: cellular process (GO:0009987);; molecular function: catalytic activity (GO:0003824)	RNA transport (ko03013)	--
c100878.graph_c0	0	0	0	0	0	0	0	0	0	0	0	0	0	0	0	0	0	1.85	0	0.62	0	0	0	0	0	0	0	0	--	Biological Process: spliceosomal snRNP assembly (GO:0000387);; Cellular Component: nucleus (GO:0005634);;	K11087|1.1e-34|gab:108467990|K11087 small nuclear ribonucleoprotein D1 | (RefSeq) small nuclear ribonucleoprotein Sm D1-like	RNA processing and modification	LSM domain	Small nuclear ribonucleoprotein SmD1b OS=Arabidopsis thaliana OX=3702 GN=SMD1B PE=3 SV=1	Small nuclear ribonucleoprotein Sm D1 (Fragment) OS=Gossypium tomentosum OX=34277 GN=ES332_D08G083900v1 PE=3 SV=1	RNA processing and modification	hypothetical protein ES288_D08G085100v1, partial [Gossypium darwinii]	biological process: metabolic process (GO:0008152);; biological process: cellular process (GO:0009987);; biological process: cellular component organization or biogenesis (GO:0071840);; cellular component: cell (GO:0005623);; cellular component: organelle (GO:0043226);; cellular component: cell part (GO:0044464)	Spliceosome (ko03040)	--
c107903.graph_c0	0	0	2.16	0.72	0	0	0	0	0	0	0	0	0	0	0	0	0	0	0	0	0	0	0	0	0	0	0	0	--	--	--	--	--	--	--	--	--	--	--	--
c75284.graph_c0	6.98	9.9	13.06	9.98	10.69	6.16	9.95	8.93	9.93	9.72	8.03	9.23	9.96	11.72	11.23	10.97	12.67	8.37	12.82	11.29	11.75	12.71	13.12	14.9	14.08	11.92	11.07	12.36	--	Cellular Component: endoplasmic reticulum membrane (GO:0005789);; Cellular Component: integral component of membrane (GO:0016021);;	K20723|3.3e-76|oeu:111410146|K20723 reticulon-3 | (RefSeq) reticulon-like protein B11	Intracellular trafficking, secretion, and vesicular transport	Reticulon	Reticulon-like protein B11 OS=Arabidopsis thaliana OX=3702 GN=RTNLB11 PE=2 SV=1	Reticulon-like protein OS=Salvia splendens OX=180675 GN=Saspl_006861 PE=4 SV=1	Intracellular trafficking, secretion, and vesicular transport	hypothetical protein Saspl_006861 [Salvia splendens]	cellular component: cell (GO:0005623);; cellular component: membrane (GO:0016020);; cellular component: organelle (GO:0043226);; cellular component: organelle part (GO:0044422);; cellular component: membrane part (GO:0044425);; cellular component: cell part (GO:0044464)	--	--
c82389.graph_c0	13.18	13.67	11.85	12.9	12.78	10.19	13.01	11.99	12.63	10.35	10.97	11.32	13.1	12.46	13.49	13.02	13.26	12.89	11.09	12.41	15.21	11.34	13.04	12.58	13.74	15.37	10.52	13.21	Translation, ribosomal structure and biogenesis	Molecular Function: tRNA binding (GO:0000049);; Molecular Function: tRNA (guanine-N2-)-methyltransferase activity (GO:0004809);;	K00555|1.4e-185|sind:105160800|K00555 tRNA (guanine26-N2/guanine27-N2)-dimethyltransferase [EC:2.1.1.215 2.1.1.216] | (RefSeq) tRNA (guanine(26)-N(2))-dimethyltransferase	Translation, ribosomal structure and biogenesis	N2,N2-dimethylguanosine tRNA methyltransferase	--	tRNA (Guanine26-N2/guanine27-N2)-dimethyltransferase OS=Salvia splendens OX=180675 GN=TRMT1 PE=3 SV=1	Translation, ribosomal structure and biogenesis	tRNA (guanine26-N2/guanine27-N2)-dimethyltransferase [Salvia splendens]	molecular function: binding (GO:0005488);; molecular function: catalytic activity (GO:0003824);; biological process: metabolic process (GO:0008152);; biological process: cellular process (GO:0009987)	--	--
c75826.graph_c3	0	0	0	0	0.57	0.68	0.58	0.61	1.31	0.26	0	0.52	0	0	0.27	0.09	0	0.76	0	0.25	0	0	0.1	0.3	0	0	0	0	--	--	--	--	--	--	--	--	--	--	--	--
c43127.graph_c0	0.53	0	0	0.18	0	0	0	0	2.2	0	0	0.73	1.19	0	0.23	0.47	0	1.08	0	0.36	0.25	0	0.17	0.25	2.32	2.57	0.73	1.87	--	--	--	--	--	--	--	--	--	--	--	--
c45658.graph_c0	0.65	0.8	1.13	0.86	1.36	0.53	0	0.63	1.78	1.37	0.74	1.3	1.47	0.68	0.75	0.97	0.64	0.53	2.58	1.25	1.45	1.42	1.41	1.36	1.32	0.62	0.4	0.78	--	--	--	--	--	--	Uncharacterized protein OS=Salvia splendens OX=180675 GN=Saspl_004198 PE=4 SV=1	Function unknown	hypothetical protein Saspl_004198 [Salvia splendens]	--	--	--
c100534.graph_c0	0	0	0	0	0	0	0	0	0	0	0	0	0	0	0	0	0	3.66	0	1.22	0	0	0	0	0	0	0	0	--	--	--	Signal transduction mechanisms	--	--	--	--	glutamate-gated chloride channel-like [Rhodamnia argentea]	--	--	LOC115738422
c112312.graph_c0	0	0	0	0	0	0	0	0	0	0	0	0	1.76	0	0	0.59	0	0	0	0	0	0	0	0	0	0	0	0	--	--	--	--	--	--	--	--	--	--	--	--
c13737.graph_c0	0	0	0	0	0	0	0	0	0	0	0	0	0	0	0	0	0	0	0	0	0	0	0	0	0	0	0	0	--	--	--	--	--	--	--	--	--	--	--	--
c85221.graph_c0	23.52	22	28.21	24.58	23.61	25.01	28.73	25.78	28.16	23.47	25.22	25.62	31.1	31.5	26.49	29.7	25.22	27.74	31.57	28.18	29.83	32.93	31.28	31.08	32.16	30.41	28.84	30.47	Signal transduction mechanisms	Molecular Function: protein serine/threonine kinase activity (GO:0004674);; Molecular Function: ATP binding (GO:0005524);;	K12767|4.2e-84|cme:CYME_CML232C|K12767 serine/threonine-protein kinase RIM15 [EC:2.7.11.1] | (RefSeq) RIM15-like serine/threonine kinase	--	Protein kinase domain;; Protein tyrosine and serine/threonine kinase	Probable serine/threonine protein kinase IREH1 OS=Arabidopsis thaliana OX=3702 GN=IREH1 PE=1 SV=1	Uncharacterized protein OS=Salvia splendens OX=180675 GN=Saspl_021570 PE=4 SV=1	Signal transduction mechanisms	hypothetical protein Saspl_021570 [Salvia splendens]	molecular function: catalytic activity (GO:0003824);; biological process: metabolic process (GO:0008152);; biological process: cellular process (GO:0009987);; molecular function: binding (GO:0005488)	--	--
c63840.graph_c0	0.62	2.66	3.44	2.24	0.62	0	0	0.21	3.67	0.68	0.47	1.61	1.61	0.36	1.6	1.19	2.52	0.81	0.82	1.38	5.22	1.37	2.67	1.42	1.98	1.17	6.16	3.1	--	--	--	--	--	--	--	--	--	--	--	--
c99724.graph_c0	0	0	0	0	3.37	0	0	1.12	0	0	0	0	0	0	0	0	0	0	0	0	0	0	0	0	0	0	0	0	--	Molecular Function: glutathione transferase activity (GO:0004364);; Cellular Component: cytoplasm (GO:0005737);; Biological Process: glutathione metabolic process (GO:0006749);;	K00799|7.8e-12|sind:105176892|K00799 glutathione S-transferase [EC:2.5.1.18] | (RefSeq) LOW QUALITY PROTEIN: probable glutathione S-transferase	Posttranslational modification, protein turnover, chaperones	--	Glutathione S-transferase 3 OS=Glycine max OX=3847 GN=GST3 PE=1 SV=1	Uncharacterized protein OS=Erythranthe guttata OX=4155 GN=MIMGU_mgv1a013400mg PE=4 SV=1	Posttranslational modification, protein turnover, chaperones	hypothetical protein MIMGU_mgv1a013400mg [Erythranthe guttata]	molecular function: catalytic activity (GO:0003824);; cellular component: cell (GO:0005623);; cellular component: cell part (GO:0044464);; biological process: metabolic process (GO:0008152);; biological process: cellular process (GO:0009987)	Glutathione metabolism (ko00480)	LOC105970370
c65819.graph_c0	0.99	0.06	0.57	0.54	0.18	1.33	0.25	0.59	0.22	0.23	0.06	0.17	0.48	0.18	0.7	0.45	0.8	0.16	0.32	0.43	0.32	0.93	0.44	0.06	0.46	0.25	0.61	0.44	--	Molecular Function: protein binding (GO:0005515);;	K11649|4.4e-22|mtr:MTR_6g053260|K11649 SWI/SNF related-matrix-associated actin-dependent regulator of chromatin subfamily C | (RefSeq) F-box and associated interaction domain protein	--	F-box associated;; F-box domain;; F-box-like;; F-box associated domain	Putative F-box protein At3g52320 OS=Arabidopsis thaliana OX=3702 GN=At3g52320 PE=4 SV=1	F-box domain-containing protein OS=Erythranthe guttata OX=4155 GN=MIMGU_mgv1a002886mg PE=4 SV=1	Function unknown	F-box protein At3g07870-like [Sesamum indicum]	molecular function: binding (GO:0005488)	--	--
c58352.graph_c0	0.21	0.2	0.2	0.2	0.13	0.07	0	0.07	0.46	0.18	0	0.21	0	0.25	0.06	0.1	0.05	0.12	0.34	0.17	0.54	0.37	0.42	0.35	0.49	0.2	2.05	0.91	--	--	--	--	--	--	--	--	--	--	--	--
c90685.graph_c0	0	0	0	0	0.37	0	0	0.12	0	0	0	0	0	0	0	0	0	1	0.95	0.65	0	0.37	0.12	0	0.37	0	0	0.12	--	--	--	--	--	--	--	--	--	--	--	--
c101303.graph_c0	0	0	0	0	0	0	0	0	0	5.01	0	1.67	0	0	0	0	0	0	0	0	0	0	0	0	0	0	0	0	--	--	--	--	--	--	--	--	--	--	--	--
c90052.graph_c0	0	0	0	0	0	0	0	0	0	0	0	0	0	0	0	0	0	0	0	0	0	0	0	0	0	0	0	0	--	--	--	--	--	--	--	--	--	--	--	--
c469.graph_c0	0	1.15	0	0.38	0	0	0	0	0	0	0	0	0	0.46	0	0.15	0	0	0	0	0.47	0	0.16	0	0.22	0	0.46	0.23	Carbohydrate transport and metabolism	Biological Process: glucose metabolic process (GO:0006006);; Molecular Function: oxidoreductase activity, acting on the aldehyde or oxo group of donors, NAD or NADP as acceptor (GO:0016620);; Molecular Function: NADP binding (GO:0050661);; Molecular Function: NAD binding (GO:0051287);;	K00134|1.0e-69|adu:107494853|K00134 glyceraldehyde 3-phosphate dehydrogenase [EC:1.2.1.12] | (RefSeq) glyceraldehyde-3-phosphate dehydrogenase, cytosolic-like	Carbohydrate transport and metabolism	Glyceraldehyde 3-phosphate dehydrogenase, C-terminal domain	Glyceraldehyde-3-phosphate dehydrogenase GAPCP1, chloroplastic OS=Arabidopsis thaliana OX=3702 GN=GAPCP1 PE=1 SV=1	Glyceraldehyde-3-phosphate dehydrogenase OS=Mesostigma viride OX=41882 GN=GapC PE=2 SV=1	Carbohydrate transport and metabolism	glyceraldehyde 3-phosphate dehydrogenase [Melanopsichium pennsylvanicum 4]	biological process: metabolic process (GO:0008152);; biological process: single-organism process (GO:0044699);; molecular function: catalytic activity (GO:0003824);; molecular function: binding (GO:0005488)	Glycolysis / Gluconeogenesis (ko00010);; Carbon fixation in photosynthetic organisms (ko00710);; Carbon metabolism (ko01200);; Biosynthesis of amino acids (ko01230)	--
c33940.graph_c0	0	0	0	0	0	0	0	0	0	0	0	0	0	0	0	0	0	0	0	0	0	0	0	0	0	0	0	0	--	--	--	--	--	--	--	--	--	--	--	--
c79665.graph_c0	7.16	6.77	10.48	8.14	7.36	8.05	9.87	8.43	9.99	8.21	9.45	9.22	10.48	14.48	8.38	11.11	8.52	9.99	11.98	10.16	18.01	17.33	17.18	16.19	15	16.87	14.85	15.57	--	--	--	--	--	--	Uncharacterized protein OS=Salvia splendens OX=180675 GN=Saspl_051100 PE=4 SV=1	--	hypothetical protein Saspl_051100 [Salvia splendens]	--	--	--
c67998.graph_c0	18.89	11.06	21.96	17.3	17.46	10.62	14.13	14.07	17.86	19.32	8.55	15.24	16.1	16.94	18.32	17.12	19.26	17.24	13.07	16.52	21.53	11.2	18.06	21.46	18.7	29.77	21.79	23.42	--	Molecular Function: ribose-5-phosphate isomerase activity (GO:0004751);; Biological Process: pentose-phosphate shunt, non-oxidative branch (GO:0009052);;	K01807|2.0e-15|oeu:111395438|K01807 ribose 5-phosphate isomerase A [EC:5.3.1.6] | (RefSeq) probable ribose-5-phosphate isomerase 1	Carbohydrate transport and metabolism	--	Probable ribose-5-phosphate isomerase 1 OS=Arabidopsis thaliana OX=3702 GN=RPI1 PE=1 SV=1	Ribose-5-phosphate isomerase OS=Handroanthus impetiginosus OX=429701 GN=CDL12_17243 PE=3 SV=1	Carbohydrate transport and metabolism	Ribose 5-phosphate isomerase [Handroanthus impetiginosus]	molecular function: catalytic activity (GO:0003824);; biological process: metabolic process (GO:0008152);; biological process: cellular process (GO:0009987);; biological process: single-organism process (GO:0044699)	Pentose phosphate pathway (ko00030);; Carbon fixation in photosynthetic organisms (ko00710);; Carbon metabolism (ko01200);; Biosynthesis of amino acids (ko01230)	--
c35854.graph_c2	0	0	0	0	0	0	0	0	0	0	0	0	0	0	0	0	0	0	0	0	0	0	0	0	0.58	0	0	0.19	Carbohydrate transport and metabolism	Molecular Function: fructose-bisphosphate aldolase activity (GO:0004332);; Biological Process: glycolytic process (GO:0006096);;	K01623|1.7e-51|han:110908353|K01623 fructose-bisphosphate aldolase, class I [EC:4.1.2.13] | (RefSeq) fructose-bisphosphate aldolase 6, cytosolic-like	Carbohydrate transport and metabolism	Fructose-bisphosphate aldolase class-I	Fructose-bisphosphate aldolase, cytoplasmic isozyme OS=Spinacia oleracea OX=3562 PE=2 SV=1	Fructose-bisphosphate aldolase OS=Camellia fraterna OX=542725 PE=2 SV=1	Carbohydrate transport and metabolism	fructose-bisphosphate aldolase [Camellia fraterna]	molecular function: catalytic activity (GO:0003824);; biological process: metabolic process (GO:0008152);; biological process: cellular process (GO:0009987);; biological process: single-organism process (GO:0044699)	Glycolysis / Gluconeogenesis (ko00010);; Pentose phosphate pathway (ko00030);; Fructose and mannose metabolism (ko00051);; Carbon fixation in photosynthetic organisms (ko00710);; Carbon metabolism (ko01200);; Biosynthesis of amino acids (ko01230)	--
c27129.graph_c0	0	0	0	0	0	0	0	0	1.01	0	0	0.34	0	0	0	0	0	0	0	0	0	0	0	0	0	0	0	0	--	--	--	--	--	--	--	--	--	--	--	--
c81794.graph_c0	3.26	3.22	2.89	3.12	3.27	2.96	3.48	3.24	3.85	4	4.03	3.96	4.37	3.98	4.69	4.35	1.8	1.94	2.93	2.22	2.58	2.18	2.5	2.73	2.99	2.96	2.68	2.88	--	Molecular Function: nucleic acid binding (GO:0003676);; Molecular Function: DNA-directed DNA polymerase activity (GO:0003887);; Biological Process: DNA integration (GO:0015074);;	K01303|3.4e-34|fve:101311565|K01303 acylaminoacyl-peptidase [EC:3.4.19.1] | (RefSeq) uncharacterized LOC101311565	General function prediction only	Retrotransposon gag protein	--	DNA-directed DNA polymerase OS=Handroanthus impetiginosus OX=429701 GN=CDL12_26122 PE=4 SV=1	Replication, recombination and repair	uncharacterized protein LOC116205261 [Punica granatum]	molecular function: binding (GO:0005488);; molecular function: catalytic activity (GO:0003824);; biological process: metabolic process (GO:0008152);; biological process: cellular process (GO:0009987)	--	LOC116205261
c89174.graph_c0	0.71	0	0	0.24	1.61	0	0	0.54	0	0	0	0	0	0.34	0	0.11	0.5	0.29	0	0.26	0.34	0.95	0.77	1.02	0	1.39	0	0.46	--	--	--	--	--	--	--	--	--	--	--	--
c70194.graph_c0	0.2	0	0.98	0.39	0.54	1.5	1.07	1.04	0.7	0	1.06	0.59	0.18	0.4	0.79	0.46	0.91	0.24	0.99	0.71	0.53	1.4	0.99	1.05	1.19	0.34	0.77	0.77	--	--	--	--	--	--	--	--	--	--	--	--
c81202.graph_c0	40.82	46.99	38.21	42.01	40.58	43.07	53.12	45.59	33.95	36.14	46.65	38.91	46.23	41.36	40.09	42.56	47.07	61.2	40.39	49.55	46.72	46.62	46.1	44.95	43.16	44.41	45.96	44.51	--	Cellular Component: integral component of membrane (GO:0016021);;	K23877|3.3e-51|lja:Lj0g3v0355939.2|K23877 xyloglucan O-acetyltransferase | (RefSeq) Lj0g3v0355939.2; -	--	GDSL/SGNH-like Acyl-Esterase family found in Pmr5 and Cas1p;; PMR5 N terminal Domain	Protein trichome birefringence-like 11 OS=Arabidopsis thaliana OX=3702 GN=TBL11 PE=2 SV=1	PMR5N domain-containing protein OS=Salvia splendens OX=180675 GN=Saspl_026945 PE=3 SV=1	Function unknown	hypothetical protein Saspl_026945 [Salvia splendens]	cellular component: membrane (GO:0016020);; cellular component: membrane part (GO:0044425)	--	--
c33556.graph_c0	0	0	0	0	0	0	0	0	0.62	0	0	0.21	0	0	0	0	0	2.32	0	0.77	0	0	0	0	0	0	0	0	--	--	--	--	--	--	--	--	--	--	--	--
c283.graph_c1	0	0	0	0	0	0	0	0	0	0	0	0	0	0	0	0	0	0.76	0	0.25	0	0	0	0	0	0	0	0	--	--	--	--	--	--	--	--	--	--	--	--
c138.graph_c1	0	0	0	0	0	0	0	0	0	0	0	0	0	0	0	0	0	1.28	0	0.43	0	0	0	0	0.19	0.21	0	0.13	Carbohydrate transport and metabolism	Molecular Function: hydrolase activity, hydrolyzing O-glycosyl compounds (GO:0004553);; Biological Process: carbohydrate metabolic process (GO:0005975);;	K05349|8.3e-155|sind:105170099|K05349 beta-glucosidase [EC:3.2.1.21] | (RefSeq) uncharacterized protein LOC105170099	--	Glycosyl hydrolase family 3 N terminal domain	Beta-xylosidase/alpha-L-arabinofuranosidase 2 OS=Medicago sativa subsp. varia OX=36902 GN=Xyl2 PE=2 SV=1	Beta-glucosidase 2 OS=Camellia sinensis OX=4442 PE=2 SV=1	Carbohydrate transport and metabolism	beta-glucosidase 2 [Camellia sinensis]	molecular function: catalytic activity (GO:0003824);; biological process: metabolic process (GO:0008152)	Cyanoamino acid metabolism (ko00460);; Starch and sucrose metabolism (ko00500);; Phenylpropanoid biosynthesis (ko00940)	LOC114271165
c87517.graph_c0	0	4.15	1.4	1.85	0	0	2.69	0.9	2.53	2.37	1.3	2.07	0	0	1.21	0.4	0	0	4.29	1.43	2.69	0	0.9	0	2.62	0	0	0.87	--	--	--	--	--	--	--	--	--	--	--	--
c72147.graph_c0	2.49	2.43	2.19	2.37	2.13	1.6	1.59	1.77	2.22	1.43	2.04	1.9	1.72	1.57	1.28	1.52	2.49	1.29	3.11	2.3	1.63	3.29	2.48	2.53	2.96	2.5	0.81	2.09	--	--	--	--	--	--	--	--	--	--	--	--
c82577.graph_c0	0	0	0	0	0	0	0	0	0	0	0	0	0	0	0	0	0	0	0	0	0	0	0	0	2.23	0	0	0.74	--	--	--	--	--	--	--	--	--	--	--	--
c79402.graph_c0	34.95	40.53	42.34	39.27	39.62	37.24	35.97	37.61	44.92	36.85	35.88	39.22	38.38	34.86	47.8	40.35	37.83	42.36	54.81	45	55.83	48.88	51.45	49.64	47.49	45.15	44.63	45.76	--	Cellular Component: integral component of membrane (GO:0016021);;	K20890|2.2e-41|oeu:111370894|K20890 xylan alpha-glucuronosyltransferase [EC:2.4.1.-] | (RefSeq) UDP-glucuronate:xylan alpha-glucuronosyltransferase 1-like	General function prediction only	Ankyrin repeats (3 copies);; Ankyrin repeat;; Domain of unknown function	--	ANK_REP_REGION domain-containing protein OS=Salvia splendens OX=180675 GN=Saspl_018839 PE=4 SV=1	Replication, recombination and repair	hypothetical protein Saspl_018839 [Salvia splendens]	cellular component: membrane (GO:0016020);; cellular component: membrane part (GO:0044425)	--	--
c83590.graph_c2	240.88	260.24	225.08	242.07	247.86	217.74	230.91	232.17	247.62	290.39	252.44	263.48	253.52	257.34	277	262.62	206.76	197.71	199.16	201.21	250.21	217.79	222.68	200.03	256.29	223.39	220.14	233.27	--	Molecular Function: oxidoreductase activity (GO:0016491);;	K19825|3.9e-27|sind:105167157|K19825 2-alkenal reductase (NADP+) [EC:1.3.1.102] | (RefSeq) 2-alkenal reductase (NADP(+)-dependent)	General function prediction only	N-terminal domain of oxidoreductase	2-alkenal reductase (NADP(+)-dependent) OS=Nicotiana tabacum OX=4097 GN=DBR PE=1 SV=1	Alcohol dehydrogenase superfamily OS=Macleaya cordata OX=56857 GN=BVC80_59g34 PE=4 SV=1	Function unknown	Alcohol dehydrogenase superfamily [Macleaya cordata]	molecular function: catalytic activity (GO:0003824);; biological process: metabolic process (GO:0008152);; biological process: single-organism process (GO:0044699)	--	--
c61497.graph_c0	0.26	0	0.5	0.25	0	0.28	0.49	0.26	0	0.44	0	0.15	3.06	0	0.23	1.1	0	0.64	0	0.21	0.25	0	0.08	0	0.23	0.25	0.48	0.32	--	--	--	--	--	--	--	--	--	--	--	--
c8245.graph_c0	0	0	0	0	0	0	0	0	0	0	0	0	0	0	0	0	0	0	2.43	0.81	0	0	0	0	0	0	0	0	--	--	--	--	--	--	--	--	--	--	--	--
c17295.graph_c0	0	0	0	0	0	0	0	0	0	0	0	0	0	0	0	0	0	0	0	0	0	0	0	0	0	0	0	0	--	--	--	--	--	--	--	--	--	--	--	--
c74921.graph_c0	3.05	4.26	2.56	3.29	3.75	2.45	1.88	2.69	3.61	4.39	3.1	3.7	2.59	2.37	2.84	2.6	2	2.48	2.56	2.35	2.98	2.9	3.34	4.15	2.88	3.41	3.09	3.13	--	Cellular Component: nucleus (GO:0005634);; Biological Process: regulation of transcription, DNA-templated (GO:0006355);; Molecular Function: zinc ion binding (GO:0008270);;	K17604|5.3e-78|dcr:108207429|K17604 zinc finger SWIM domain-containing protein 3 | (RefSeq) protein FAR1-RELATED SEQUENCE 5-like	--	MULE transposase domain;; FAR1 DNA-binding domain;; SWIM zinc finger	Protein FAR1-RELATED SEQUENCE 5 OS=Arabidopsis thaliana OX=3702 GN=FRS5 PE=1 SV=1	Protein FAR1-RELATED SEQUENCE OS=Cuscuta campestris OX=132261 GN=CCAM_LOCUS19702 PE=3 SV=1	Function unknown	protein FAR1-RELATED SEQUENCE 5-like [Ipomoea triloba]	cellular component: cell (GO:0005623);; cellular component: organelle (GO:0043226);; cellular component: cell part (GO:0044464);; biological process: biological regulation (GO:0065007);; molecular function: binding (GO:0005488)	--	LOC116019571
c49628.graph_c2	0	0	0	0	0	0	0	0	0	0	0	0	0	0	0	0	0	0	0	0	0	0	0	0	0	0	0	0	--	--	--	--	--	--	--	--	--	--	--	--
c33690.graph_c0	0.18	0.08	0.27	0.18	0	0.09	0	0.03	0	0.77	0.18	0.32	0.09	0.09	0	0.06	0	0	0.71	0.24	0.16	0.15	0.29	0.57	0.08	0.35	0.18	0.2	--	--	--	--	--	--	--	--	--	--	--	--
c89624.graph_c0	0.49	0	0	0.16	0.11	0	0	0.04	0	1.96	0	0.65	0	0	0	0	0	0	0	0	0	0	0	0	0.11	0	0	0.04	--	Cellular Component: peroxisome (GO:0005777);; Cellular Component: integral component of membrane (GO:0016021);; Biological Process: protein import into peroxisome matrix, docking (GO:0016560);;	K13344|1.6e-88|gra:105803368|K13344 peroxin-13 | (RefSeq) peroxisomal membrane protein 13	--	--	Peroxisomal membrane protein 13 OS=Arabidopsis thaliana OX=3702 GN=PEX13 PE=1 SV=1	Peroxin-13 OS=Gossypium raimondii OX=29730 GN=B456_007G162100 PE=3 SV=1	Function unknown	hypothetical protein F0562_002186 [Nyssa sinensis]	cellular component: cell (GO:0005623);; cellular component: organelle (GO:0043226);; cellular component: cell part (GO:0044464);; cellular component: membrane (GO:0016020);; cellular component: membrane part (GO:0044425);; biological process: cellular process (GO:0009987);; biological process: single-organism process (GO:0044699);; biological process: localization (GO:0051179);; biological proces…	Peroxisome (ko04146)	--
c1648.graph_c0	0	0	0	0	0	0	0	0	0	0	0	0	0	0	0	0	0	0	0	0	0	0.48	0.83	2.01	0	0	0	0	--	--	--	--	--	--	--	--	hypothetical protein K431DRAFT_296516 [Polychaeton citri CBS 116435]	--	--	--
c64381.graph_c1	0.17	0	0	0.06	0	0.34	0	0.11	0.14	0	0	0.05	0.46	0	0	0.15	0	0	0.13	0.04	0	0.15	0.05	0	0.3	0.16	0.31	0.26	--	Biological Process: immune system process (GO:0002376);; Cellular Component: cellular_component (GO:0005575);; Cellular Component: intracellular (GO:0005622);; Cellular Component: obsolete cell (GO:0005623);; Cellular Component: cytoplasm (GO:0005737);; Cellular Component: plasma membrane (GO:0005886);; Biological Process: response to stress (GO:0006950);; Biological Process: defense response (GO…	--	--	--	--	Uncharacterized protein OS=Salvia splendens OX=180675 GN=Saspl_010785 PE=4 SV=1	Signal transduction mechanisms	hypothetical protein Saspl_010785 [Salvia splendens]	biological process: immune system process (GO:0002376);; cellular component: cell (GO:0005623);; cellular component: cell part (GO:0044464);; cellular component: membrane (GO:0016020);; biological process: response to stimulus (GO:0050896);; biological process: cellular process (GO:0009987);; biological process: signaling (GO:0023052);; biological process: single-organism process (GO:0044699);; b…	--	--
c52833.graph_c0	0.47	0	0	0.16	0	0.24	0.44	0.23	0.97	0	0.22	0.4	0	0	0	0	0	0	0	0	0	0.21	0.07	0	0	0	0.21	0.07	--	--	--	--	--	--	--	--	--	--	--	--
c100549.graph_c0	0	0	0	0	0	0	0	0	0	1.62	0	0.54	0	0	0	0	0	0	0	0	0	0	0	0	0	0	0	0	Energy production and conversion	Biological Process: carbohydrate metabolic process (GO:0005975);; Biological Process: tricarboxylic acid cycle (GO:0006099);; Biological Process: malate metabolic process (GO:0006108);; Molecular Function: L-malate dehydrogenase activity (GO:0030060);;	K00026|1.5e-47|cpap:110823592|K00026 malate dehydrogenase [EC:1.1.1.37] | (RefSeq) malate dehydrogenase, chloroplastic	Energy production and conversion	lactate/malate dehydrogenase, alpha/beta C-terminal domain	Malate dehydrogenase, chloroplastic OS=Arabidopsis thaliana OX=3702 GN=At3g47520 PE=1 SV=1	Malate dehydrogenase OS=Handroanthus impetiginosus OX=429701 GN=CDL12_04774 PE=3 SV=1	Energy production and conversion	NAD-dependent malate dehydrogenase [Handroanthus impetiginosus]	biological process: metabolic process (GO:0008152);; biological process: cellular process (GO:0009987);; biological process: single-organism process (GO:0044699);; molecular function: catalytic activity (GO:0003824)	Citrate cycle (TCA cycle) (ko00020);; Cysteine and methionine metabolism (ko00270);; Pyruvate metabolism (ko00620);; Glyoxylate and dicarboxylate metabolism (ko00630);; Carbon fixation in photosynthetic organisms (ko00710);; Carbon metabolism (ko01200)	--
c78071.graph_c0	15.7	10.82	18.67	15.06	13.45	12.52	15.38	13.78	14.57	16.99	13.82	15.13	16.08	14.32	14.67	15.02	19.59	18.73	25.84	21.39	15.37	19.65	16.84	15.51	16.04	16.32	17.1	16.49	--	Biological Process: lipid metabolic process (GO:0006629);; Biological Process: isoprenoid metabolic process (GO:0006720);; Biological Process: terpenoid metabolic process (GO:0006721);; Biological Process: biological_process (GO:0008150);; Biological Process: metabolic process (GO:0008152);; Biological Process: isoprenoid biosynthetic process (GO:0008299);; Biological Process: lipid biosynthetic …	--	--	--	Protein NEOXANTHIN-DEFICIENT 1 OS=Solanum lycopersicum OX=4081 GN=NXD1 PE=4 SV=1	Uncharacterized protein OS=Erythranthe guttata OX=4155 GN=MIMGU_mgv1a011238mg PE=4 SV=1	Function unknown	protein NEOXANTHIN-DEFICIENT 1 [Sesamum indicum]	biological process: metabolic process (GO:0008152);; biological process: single-organism process (GO:0044699);; biological process: cellular process (GO:0009987)	--	LOC105168474
c42573.graph_c0	0	0	0	0	0	0	0	0	0	0	0	0	0	0	0	0	0	0	0	0	0	0	0	0	0	0	0	0	--	--	--	--	--	--	--	--	--	--	--	--
c115250.graph_c0	0	0	0	0	0	0	0	0	0	0	0	0	0	0	0	0	0	0	0	0	0	0	0	0	0	0	0	0	--	--	--	--	--	--	--	--	--	--	--	--
c66757.graph_c0	0	0.72	0.98	0.57	0.7	1.33	0.23	0.75	0.69	0.22	0.99	0.63	0.46	1.45	1.24	1.05	0.93	1.27	0.2	0.8	0.32	0.92	0.81	1.2	1.42	0.24	1.71	1.12	--	--	--	--	--	--	--	--	--	--	--	--
c103681.graph_c0	0	0	0	0	0	0	0	0	0	0	0	0	0	0	0	0	0.31	0.36	0	0.22	0	0	0	0	0.4	0	0	0.13	--	--	--	--	--	--	--	--	--	--	--	--
c112719.graph_c0	0	0	0	0	0	0	0	0	0	0	0	0	0	0	0	0	0	0	0	0	0	0	0	0	0	0	0	0	--	--	--	--	--	--	--	--	--	--	--	--
c92026.graph_c0	0.58	0	0	0.19	0	0	0.81	0.27	0	0	0	0	0	0	0	0	0	0	0	0	0.83	0	0.28	0	0.26	0	0	0.09	--	--	--	--	--	--	--	--	--	--	--	--
c46191.graph_c0	0	0	0	0	0	0	0	0	0	0	0	0	0	0	0	0	0	0	0.53	0.18	0	0	0	0	0	0	0	0	--	--	--	--	--	--	--	--	--	--	--	--
c61192.graph_c0	0	0.41	1.04	0.48	0.13	0	0.27	0.13	0.12	0.62	0.42	0.39	0.53	0	0.26	0.26	0.11	0.36	0	0.16	0.14	0.26	0.32	0.57	0.26	0.14	0.41	0.27	--	--	--	--	--	--	--	--	--	--	--	--
c70045.graph_c1	19.81	22.38	20.96	21.05	17.6	17.76	22.51	19.29	20.49	17.96	16.9	18.45	20.31	17.75	18.8	18.95	16.43	22.85	22.11	20.46	24.08	22.62	23.31	23.22	20.8	21.87	22.02	21.56	Signal transduction mechanisms	Molecular Function: calcium ion binding (GO:0005509);; Biological Process: calcium-mediated signaling (GO:0019722);;	K02183|2.1e-48|cpap:110816934|K02183 calmodulin | (RefSeq) calmodulin-7-like isoform X1	Signal transduction mechanisms	EF hand;; EF-hand domain pair;; EF-hand domain pair;; EF hand;; EF-hand domain;; EF-hand domain;; Cytoskeletal-regulatory complex EF hand;; EF-hand domain;; Secreted protein acidic and rich in cysteine Ca binding region;; Ca2+ insensitive EF hand	Calmodulin-1/11/16 OS=Daucus carota OX=4039 GN=CAM-1 PE=2 SV=2	Calmodulin OS=Solanum chacoense OX=4108 PE=3 SV=1	--	calmodulin 2 [Arabidopsis thaliana]	molecular function: binding (GO:0005488);; biological process: cellular process (GO:0009987);; biological process: signaling (GO:0023052);; biological process: single-organism process (GO:0044699);; biological process: response to stimulus (GO:0050896);; biological process: biological regulation (GO:0065007)	MAPK signaling pathway - plant (ko04016);; Phosphatidylinositol signaling system (ko04070);; Plant-pathogen interaction (ko04626)	CAM2
c86146.graph_c2	0.84	0.85	0.29	0.66	0.68	0.61	1.28	0.86	1.13	1.03	1.32	1.16	1.92	0.41	1.5	1.28	0.67	1.87	1.32	1.29	0.73	1.2	1.33	2.06	0.53	0.15	1.26	0.65	--	--	--	--	--	--	--	--	--	--	--	--
c90521.graph_c0	0	0	0	0	0	0	0	0	0	0	0	0	0	0	0	0	0	0	0	0	1.21	0	0.4	0	0	0	0	0	--	--	--	--	--	--	--	--	--	--	--	--
c47715.graph_c0	0.24	0.9	0.92	0.69	0	1.01	0.68	0.56	0.81	0.6	0	0.47	0.15	0.22	0.63	0.33	0	0.4	0	0.13	0.47	0.84	0.44	0	0.43	0.69	0.9	0.67	--	--	--	--	--	--	--	--	--	--	--	--
c79236.graph_c0	12.85	14.81	12.77	13.48	11.53	15.71	15.59	14.28	17.7	14.48	15.43	15.87	15.73	17.39	14.22	15.78	12.13	16.95	14.95	14.68	17.19	17.09	16.04	13.85	16.46	15.79	14.98	15.74	--	--	--	--	--	--	Uncharacterized protein OS=Salvia splendens OX=180675 GN=Saspl_012081 PE=4 SV=1	--	hypothetical protein Saspl_046597 [Salvia splendens]	--	--	--
c46342.graph_c0	1.14	0.66	0.54	0.78	1.16	0.28	0.53	0.66	0.71	0.72	1.24	0.89	0.65	0.13	1.12	0.63	0.11	0.7	0.11	0.31	0.27	0.5	0.26	0	0.5	1.1	1.05	0.88	--	--	--	--	--	--	--	--	--	--	--	--
c95098.graph_c0	0	0	0	0	0	0	0	0	0	3.8	0	1.27	0	0	0	0	0	0	0	0	0	0	0	0	0	0	0	0	--	--	--	--	--	--	--	--	--	--	--	--
c6491.graph_c0	0	0	0	0	0	0	0	0	0	0	0.41	0.14	0	0	1.13	0.38	0	0	0	0	0.84	0	0.28	0	0	0	0	0	--	--	--	--	--	--	--	--	--	--	--	--
c52301.graph_c0	0	0	0	0	0	0	0	0	0	0	2.2	0.73	0	0	0	0	0	0	0	0	0	0	0	0	0	1.62	0	0.54	--	--	--	--	--	--	--	--	--	--	--	--
c66411.graph_c0	0.1	0.38	0	0.16	0.09	0	0.36	0.15	0.17	0.26	0	0.14	0.19	0.09	0.27	0.18	0.15	0.17	0.16	0.16	0.1	1.07	0.49	0.3	0.66	0.36	0.19	0.4	--	--	K15271|1.1e-88|nto:104120869|K15271 ATP-dependent DNA helicase HFM1/MER3 [EC:3.6.4.12] | (RefSeq) LOW QUALITY PROTEIN: uncharacterized protein LOC104120869	General function prediction only	PPR repeat family;; PPR repeat;; PPR repeat;; Pentatricopeptide repeat domain;; Pentacotripeptide-repeat region of PRORP	Pentatricopeptide repeat-containing protein At2g13600 OS=Arabidopsis thaliana OX=3702 GN=PCMP-E76 PE=3 SV=1	Pentatricopeptide repeat protein (Fragment) OS=Salvia miltiorrhiza OX=226208 PE=2 SV=1	Function unknown	pentatricopeptide repeat protein, partial [Salvia miltiorrhiza]	--	--	--
c81516.graph_c0	0.79	0.6	0.75	0.71	0.71	0.75	0.53	0.66	0.71	0.37	0.81	0.63	0.71	0.5	1.09	0.77	0.59	0.58	0.96	0.71	0.42	1.03	0.71	0.68	0.61	0.52	1.2	0.78	--	--	--	--	--	--	--	--	--	--	--	--
c107687.graph_c0	0	0	0	0	1.25	0	0	0.42	0	0	0	0	0	0	0	0	0	0	0	0	0	0	0	0	0	0	0	0	Translation, ribosomal structure and biogenesis	Biological Process: box C/D snoRNA 3'-end processing (GO:0000494);; Molecular Function: RNA binding (GO:0003723);; Molecular Function: rRNA methyltransferase activity (GO:0008649);; Cellular Component: Cajal body (GO:0015030);; Biological Process: rRNA methylation (GO:0031167);; Cellular Component: box C/D snoRNP complex (GO:0031428);; Cellular Component: small-subunit processome (GO:0032040);; B…	K14563|1.1e-30|ppp:112284043|K14563 rRNA 2'-O-methyltransferase fibrillarin [EC:2.1.1.-] | (RefSeq) mediator of RNA polymerase II transcription subunit 36a	RNA processing and modification	Fibrillarin	rRNA 2'-O-methyltransferase fibrillarin 2 OS=Arabidopsis thaliana OX=3702 GN=FIB2 PE=1 SV=2	Predicted protein OS=Physcomitrella patens subsp. patens OX=3218 GN=PHYPA_008977 PE=3 SV=1	Translation, ribosomal structure and biogenesis	Fibrillarin-domain-containing protein [Thamnocephalis sphaerospora]	biological process: metabolic process (GO:0008152);; biological process: cellular process (GO:0009987);; molecular function: binding (GO:0005488);; molecular function: catalytic activity (GO:0003824);; biological process: cellular component organization or biogenesis (GO:0071840);; cellular component: cell (GO:0005623);; cellular component: membrane-enclosed lumen (GO:0031974);; cellular componen…	Ribosome biogenesis in eukaryotes (ko03008)	--
c55280.graph_c0	0	0	0	0	0	0	0	0	0	0	0	0	0	0	0	0	0	0	0	0	0	0	0	0	0.94	0	0	0.31	--	--	--	--	--	--	--	--	--	--	--	--
c36815.graph_c1	0	0	0	0	0	0	0	0	0	0	0	0	0	0	0	0	0	0	0	0	0	0	0	0	0	0	0	0	--	Molecular Function: protein binding (GO:0005515);;	--	--	PB1 domain	--	uncharacterized protein LOC104595565 OS=Nelumbo nucifera OX=4432 GN=LOC104595565 PE=4 SV=1	Function unknown	uncharacterized protein LOC111299671 [Durio zibethinus]	molecular function: binding (GO:0005488)	--	LOC111299671
c52932.graph_c0	0	0	0	0	0	0	0	0	0	0	0	0	0	0	0	0	0	0	0	0	0	0	0	0	0	0	0	0	--	--	--	--	--	--	--	--	--	--	--	--
c93895.graph_c0	0	0	0	0	0	0	0	0	0	0	0	0	0	0	0	0	0	0	0	0	0	0	0	0	2.58	0	0	0.86	--	--	--	--	--	--	--	--	--	--	--	--
c71495.graph_c1	2.72	3.01	1.88	2.54	0.7	1.53	7.02	3.08	2.16	3	5.78	3.65	3.85	4.11	2.31	3.42	9.75	8.05	13.7	10.5	10.13	12.07	11.49	12.27	5.04	7.82	8.59	7.15	Signal transduction mechanisms	Molecular Function: calcium ion binding (GO:0005509);;	K13448|8.9e-51|egr:104456341|K13448 calcium-binding protein CML | (RefSeq) calmodulin-like protein 11	Signal transduction mechanisms	EF hand;; EF-hand domain pair;; EF-hand domain;; EF hand;; EF-hand domain pair;; EF-hand domain;; Cytoskeletal-regulatory complex EF hand;; Secreted protein acidic and rich in cysteine Ca binding region;; Ca2+ insensitive EF hand;; EF-hand domain;; Caleosin related protein	Calmodulin-3 OS=Oryza sativa subsp. japonica OX=39947 GN=CAM3 PE=2 SV=1	Calmodulin OS=Salvia splendens OX=180675 GN=CALM PE=4 SV=1	Signal transduction mechanisms	calmodulin [Salvia splendens]	molecular function: binding (GO:0005488)	Plant-pathogen interaction (ko04626)	--
c48133.graph_c0	0	0	0	0	0	0	0	0	0	0	0	0	0	0.15	0	0.05	0	1.91	0	0.64	0	0	0	0	0.15	0	0	0.05	--	Cellular Component: integral component of membrane (GO:0016021);;	--	--	--	Squamosa promoter-binding-like protein 1 OS=Arabidopsis thaliana OX=3702 GN=SPL1 PE=1 SV=2	Putative squamosa promoter-binding-like protein 12 (Fragment) OS=Davidia involucrata OX=16924 GN=Din_040984 PE=4 SV=1	Function unknown	LOW QUALITY PROTEIN: squamosa promoter-binding-like protein 12 [Camellia sinensis]	cellular component: membrane (GO:0016020);; cellular component: membrane part (GO:0044425)	--	--
c95931.graph_c0	0	0	2.31	0.77	0	0	0	0	0	0	0	0	0	0	0	0	0.54	0	0	0.18	0.76	0	0.25	0	0	0	0	0	--	--	--	--	--	--	--	--	--	--	--	--
c108926.graph_c0	0	0	0	0	0	0	1.99	0.66	0	0	0	0	0	0	0	0	0	0	0	0	0	0	0	0	0	0	0	0	--	--	--	--	--	--	--	--	--	--	--	--
c68440.graph_c0	31.44	29.67	32.72	31.28	35.69	27.55	32.68	31.97	38.72	39.05	40.44	39.4	37.69	32.89	37.11	35.9	45.79	44.59	42.56	44.31	37.38	36.58	39.02	43.09	44.78	49.45	47.31	47.18	--	Biological Process: mRNA export from nucleus (GO:0006406);; Cellular Component: proteasome regulatory particle, lid subcomplex (GO:0008541);; Biological Process: proteasome assembly (GO:0043248);;	K10881|5.3e-26|nau:109213232|K10881 26 proteasome complex subunit DSS1 | (RefSeq) protein DELETION OF SUV3 SUPPRESSOR 1(I)-like isoform X1	Function unknown	DSS1/SEM1 family	Protein DELETION OF SUV3 SUPPRESSOR 1(I) OS=Arabidopsis thaliana OX=3702 GN=DSS1(I) PE=1 SV=1	26 proteasome complex subunit DSS1 OS=Salvia splendens OX=180675 GN=SHFM1 PE=4 SV=1	Function unknown	26 proteasome complex subunit DSS1 [Salvia splendens]	biological process: metabolic process (GO:0008152);; biological process: localization (GO:0051179);; cellular component: cell (GO:0005623);; cellular component: macromolecular complex (GO:0032991);; cellular component: cell part (GO:0044464);; biological process: cellular process (GO:0009987);; biological process: cellular component organization or biogenesis (GO:0071840)	Proteasome (ko03050);; Homologous recombination (ko03440)	--
c65733.graph_c0	5.59	3.25	4.95	4.6	1.9	6.97	15.05	7.97	10.29	13.14	11.64	11.69	13.76	21.28	15.26	16.77	10.09	16.49	18.21	14.93	26.35	25.62	27.43	30.32	40.02	37.42	23.69	33.71	--	--	--	--	--	--	--	--	--	--	--	--
c72148.graph_c0	34.17	16.53	57.58	36.09	44.9	44.61	29.57	39.69	29.86	14.08	21.32	21.75	35.41	24.42	14.99	24.94	17	15.61	34.63	22.41	25.25	24.11	23.49	21.12	18.58	10.71	20.5	16.6	--	--	K12761|1.0e-46|ini:109164801|K12761 carbon catabolite-derepressing protein kinase [EC:2.7.11.1] | (RefSeq) CBL-interacting serine/threonine-protein kinase 7-like	--	Domain of unknown function (DUF4228)	--	Uncharacterized protein OS=Erythranthe guttata OX=4155 GN=MIMGU_mgv1a026434mg PE=4 SV=1	Function unknown	PREDICTED: uncharacterized protein LOC105951427 [Erythranthe guttata]	--	--	LOC105951427
c90913.graph_c0	0	0	0	0	0	0	0	0	0	0	0	0	0	0	0	0	0	0	0	0	0	0	0	0	0	0	0	0	--	--	--	--	--	--	--	--	--	--	--	--
c78834.graph_c1	24.25	38.19	22	28.15	32.34	31.26	30.06	31.22	27.27	28.38	39.03	31.56	36.29	25.71	32.58	31.53	27.38	26.58	27.9	27.29	32.9	33.63	34.77	37.79	32.79	37.15	29.36	33.1	--	--	--	--	--	--	--	--	--	--	--	--
c66269.graph_c0	0	0	0	0	0	0	0	0	0	0	0	0	0	0	0	0	0	0	0	0	0	0	0	0	0	0	0	0	--	--	--	--	--	--	--	--	--	--	--	--
c93820.graph_c0	0	0	0	0	0	0	0	0	0	3.14	0	1.05	0	0	0	0	0	0	1.42	0.47	0	0	0	0	0	0	0	0	--	--	--	--	--	--	--	--	--	--	--	--
c66908.graph_c2	0.52	1.46	1.23	1.07	1.33	0.57	2.31	1.4	4.28	1.19	2.32	2.6	1.23	0.8	0.34	0.79	1.63	0.49	0.82	0.98	6.61	1.42	3.64	2.88	1.55	0.79	2.4	1.58	--	--	--	--	--	--	--	--	--	--	--	--
c25783.graph_c0	0	0	0	0	0	0	0	0	0	0	0	0	0	0	0	0	0	0	0	0	0	0	0	0	0	0	0	0	--	--	--	--	--	--	--	--	--	--	--	--
c100772.graph_c0	0	0	0	0	0	0	0	0	0	0	0	0	0	7.14	0	2.38	0	0	0	0	0	0	0	0	0	0	0	0	--	--	--	--	--	--	--	--	--	--	--	--
c83014.graph_c0	2.16	2.36	2.55	2.36	3.02	2.4	2.34	2.59	3.48	2.39	2.75	2.87	3.28	1.55	2.17	2.33	2.62	2.3	3.9	2.94	2.87	2.91	2.91	2.96	3.02	3.36	1.67	2.68	--	Biological Process: mitochondrial RNA metabolic process (GO:0000959);; Biological Process: mitochondrial RNA processing (GO:0000963);; Molecular Function: molecular_function (GO:0003674);; Molecular Function: nucleic acid binding (GO:0003676);; Molecular Function: RNA binding (GO:0003723);; Molecular Function: catalytic activity (GO:0003824);; Molecular Function: nuclease activity (GO:0004518);; …	--	General function prediction only	PPR repeat family;; PPR repeat;; PPR repeat;; Pentatricopeptide repeat domain;; Pentacotripeptide-repeat region of PRORP;; Mitochondrial 28S ribosomal protein S27	Pentatricopeptide repeat-containing protein At4g26680, mitochondrial OS=Arabidopsis thaliana OX=3702 GN=At4g26680 PE=3 SV=1	Pentatricopeptide repeat protein OS=Salvia miltiorrhiza OX=226208 PE=2 SV=1	Function unknown	pentatricopeptide repeat protein [Salvia miltiorrhiza]	biological process: metabolic process (GO:0008152);; biological process: cellular process (GO:0009987);; molecular function: binding (GO:0005488);; molecular function: catalytic activity (GO:0003824);; cellular component: cell (GO:0005623);; cellular component: cell part (GO:0044464);; cellular component: organelle (GO:0043226)	--	--
c55674.graph_c0	0.25	0.15	0.62	0.34	0.36	0.2	0	0.19	0.13	0.36	0.16	0.22	0.15	0.44	0.79	0.46	0	0	0	0	0	0	0	0	0.14	0.08	0.18	0.13	--	--	--	--	--	--	--	--	--	--	--	--
c70763.graph_c0	9.07	6.36	9.39	8.27	6.71	8.6	8.74	8.02	10.25	8.79	9.46	9.5	11.57	6.69	6.96	8.41	11.7	11.57	10.91	11.39	13.11	10.14	12.53	14.35	14.65	14.79	10.77	13.4	--	Molecular Function: nucleic acid binding (GO:0003676);; Molecular Function: helicase activity (GO:0004386);; Molecular Function: protein kinase activity (GO:0004672);; Molecular Function: ATP binding (GO:0005524);; Cellular Component: integral component of membrane (GO:0016021);; Molecular Function: carbohydrate binding (GO:0030246);;	K12812|1.8e-13|han:110891513|K12812 ATP-dependent RNA helicase UAP56/SUB2 [EC:3.6.4.13] | (RefSeq) DEAD-box ATP-dependent RNA helicase 56-like isoform X1	RNA processing and modification	--	DEAD-box ATP-dependent RNA helicase 15 OS=Arabidopsis thaliana OX=3702 GN=RH15 PE=1 SV=3	ATP-dependent RNA helicase UAP56/SUB2 OS=Salvia splendens OX=180675 GN=UAP56 PE=3 SV=1	RNA processing and modification	ATP-dependent RNA helicase UAP56/SUB2 [Salvia splendens]	molecular function: binding (GO:0005488);; molecular function: catalytic activity (GO:0003824);; biological process: metabolic process (GO:0008152);; biological process: cellular process (GO:0009987);; cellular component: membrane (GO:0016020);; cellular component: membrane part (GO:0044425)	RNA transport (ko03013);; mRNA surveillance pathway (ko03015);; Spliceosome (ko03040)	--
c87639.graph_c0	0	0	0	0	0	0	0	0	0	0	5.46	1.82	0	0	0	0	0	0	0	0	0	0	0.47	1.41	0	0	0	0	--	--	--	--	--	--	--	--	--	--	--	--
c97633.graph_c0	0	0	0	0	0	0	0	0	0	0	0	0	0	0	0	0	0	0.62	0	0.21	0	0	0	0	0.67	0.75	0	0.47	--	Molecular Function: enzyme inhibitor activity (GO:0004857);; Cellular Component: integral component of membrane (GO:0016021);; Molecular Function: pectinesterase activity (GO:0030599);; Biological Process: cell wall modification (GO:0042545);; Molecular Function: aspartyl esterase activity (GO:0045330);; Biological Process: pectin catabolic process (GO:0045490);;	K01051|3.8e-11|atr:18431458|K01051 pectinesterase [EC:3.1.1.11] | (RefSeq) pectinesterase	--	Plant invertase/pectin methylesterase inhibitor	Probable pectinesterase/pectinesterase inhibitor 34 OS=Arabidopsis thaliana OX=3702 GN=PME34 PE=2 SV=1	Pectinesterase OS=Camellia sinensis var. sinensis OX=542762 GN=TEA_009798 PE=3 SV=1	Carbohydrate transport and metabolism	probable pectinesterase/pectinesterase inhibitor 61 [Camellia sinensis]	molecular function: molecular function regulator (GO:0098772);; biological process: biological regulation (GO:0065007);; cellular component: membrane (GO:0016020);; cellular component: membrane part (GO:0044425);; molecular function: catalytic activity (GO:0003824);; biological process: cellular process (GO:0009987);; biological process: cellular component organization or biogenesis (GO:0071840);…	Pentose and glucuronate interconversions (ko00040)	LOC114262555
c22277.graph_c0	0	0	0	0	0	0	0	0	0	0	0	0	0	0	0	0	0	0	0	0	0	0	0	0	0	0	0	0	--	--	--	--	--	--	--	--	--	--	--	--
c104520.graph_c0	0	0	0	0	0	0	0	0	0	0	0	0	0	0	0	0	2.12	0	0	0.71	0	0	0	0	0	0	0	0	--	--	--	--	--	--	--	--	--	--	--	--
c104103.graph_c0	0	0	0	0	0	0	0	0	0	0	0	0	0	0	0	0	0	3.44	0	1.15	0	0	0	0	0	0	0	0	--	--	--	--	--	--	--	--	leucine-rich PPR motif-containing protein, mitochondrial-like [Rhodamnia argentea]	--	--	--
c102499.graph_c0	0	0	0	0	0	0	0	0	0	0	0	0	0	0	0	0	0	0.3	0.29	0.2	0	0	0.23	0.7	0	0	0	0	--	Molecular Function: actin binding (GO:0003779);; Molecular Function: structural molecule activity (GO:0005198);; Cellular Component: cytoskeleton (GO:0005856);;	--	--	--	--	--	--	protein 4.1-like, partial [Rhodamnia argentea]	molecular function: binding (GO:0005488);; molecular function: structural molecule activity (GO:0005198);; cellular component: cell (GO:0005623);; cellular component: organelle (GO:0043226);; cellular component: cell part (GO:0044464)	--	--
c39470.graph_c0	0	0	0	0	0	0	0	0	0	0	0.52	0.17	0	0	0	0	0	0	0	0	0	0	0	0	0	0	0	0	--	--	--	--	--	--	--	--	--	--	--	--
c81139.graph_c0	2.98	4.62	3.4	3.67	4.55	3.38	1.76	3.23	2.95	3.94	1.84	2.91	2.52	1.66	5.12	3.1	5.04	3.75	6.97	5.25	8.09	5.31	5.46	2.98	6.07	2.44	3.94	4.15	Signal transduction mechanisms	Molecular Function: protein kinase activity (GO:0004672);; Molecular Function: ATP binding (GO:0005524);; Cellular Component: integral component of membrane (GO:0016021);;	K13416|2.4e-44|jcu:105640356|K13416 brassinosteroid insensitive 1-associated receptor kinase 1 [EC:2.7.10.1 2.7.11.1] | (RefSeq) BRASSINOSTEROID INSENSITIVE 1-associated receptor kinase 1	--	Protein tyrosine and serine/threonine kinase;; Protein kinase domain;; Leucine rich repeat;; Leucine rich repeat N-terminal domain;; Leucine Rich repeats (2 copies);; Leucine Rich Repeat	LRR receptor kinase SERK2 OS=Oryza sativa subsp. japonica OX=39947 GN=SERK4 PE=3 SV=1	Protein kinase domain-containing protein OS=Salvia splendens OX=180675 GN=Saspl_015518 PE=4 SV=1	Signal transduction mechanisms	hypothetical protein Saspl_015518 [Salvia splendens]	molecular function: catalytic activity (GO:0003824);; biological process: metabolic process (GO:0008152);; biological process: cellular process (GO:0009987);; molecular function: binding (GO:0005488);; cellular component: membrane (GO:0016020);; cellular component: membrane part (GO:0044425)	MAPK signaling pathway - plant (ko04016);; Plant hormone signal transduction (ko04075);; Plant-pathogen interaction (ko04626)	--
c74076.graph_c0	0	0	0	0	0	0	0	0	0	0	0	0	0	0	0	0	0	0	0	0	0	0	0	0	0	0	0	0	--	--	--	--	--	--	--	--	--	--	--	--
c94273.graph_c0	0	0	0	0	0	1.99	0	0.66	0	0	0	0	0	0	0	0	0	0	0	0	0	0	0	0	0	0	0	0	--	--	--	--	--	--	--	--	--	--	--	--
c77916.graph_c1	4.8	4.74	6.15	5.23	7.31	4.4	7.95	6.55	7.08	7.65	9.81	8.18	7.32	9.77	5.59	7.56	4.97	5.29	5.52	5.26	8.19	4	5.28	3.66	9.06	8.31	6.35	7.91	--	--	--	--	Retrotransposon gag protein	--	Retrotrans_gag domain-containing protein OS=Salvia splendens OX=180675 GN=Saspl_047568 PE=4 SV=1	Replication, recombination and repair	hypothetical protein Saspl_047568 [Salvia splendens]	--	--	--
c68976.graph_c0	5.15	2.18	3.55	3.63	4.24	1.96	3.94	3.38	3.09	1.97	3.15	2.74	2.32	2.61	2.43	2.45	3.21	3.64	4.41	3.75	6.7	5.8	6.58	7.25	4.94	6.21	3.87	5.01	--	Cellular Component: integral component of membrane (GO:0016021);;	--	--	--	--	Uncharacterized protein OS=Salvia splendens OX=180675 GN=Saspl_032431 PE=4 SV=1	--	hypothetical protein Saspl_032431 [Salvia splendens]	cellular component: membrane (GO:0016020);; cellular component: membrane part (GO:0044425)	--	--
c67898.graph_c0	0.42	0.43	0.13	0.33	0.24	0	0.31	0.18	0.28	0	0.25	0.18	0.08	0.24	0.29	0.2	0.25	0.45	0.67	0.46	0.48	0.35	0.33	0.16	0.17	0.19	0.18	0.18	--	Molecular Function: methyltransferase activity (GO:0008168);;	K22546|1.3e-34|ath:AT3G44860|K22546 juvenile hormone-III synthase [EC:2.1.1.325] | (RefSeq) FAMT; farnesoic acid carboxyl-O-methyltransferase	--	SAM dependent carboxyl methyltransferase;; SAM dependent carboxyl methyltransferase	Loganic acid O-methyltransferase OS=Catharanthus roseus OX=4058 GN=LAMT PE=1 SV=1	Uncharacterized protein OS=Salvia splendens OX=180675 GN=Saspl_051227 PE=3 SV=1	Function unknown	hypothetical protein Saspl_051227 [Salvia splendens]	molecular function: catalytic activity (GO:0003824);; biological process: metabolic process (GO:0008152)	--	--
c68411.graph_c1	0.29	0	0	0.1	0	1.26	0	0.42	0.73	0	1.68	0.8	0.26	0.83	1.01	0.7	0.21	0.72	0.69	0.54	0	1.3	0.53	0.28	0	0.29	0	0.1	--	--	--	--	--	--	--	--	--	--	--	--
c71835.graph_c0	1.18	2.17	2.75	2.03	2.53	0.94	0.73	1.4	1.2	1.4	1.22	1.27	0.88	0.91	1.19	0.99	1.24	0.88	3.85	1.99	3.33	1.91	2.15	1.21	2	1.12	1.35	1.49	--	Molecular Function: actin binding (GO:0003779);;	--	--	KIP1-like protein	Protein NETWORKED 3A OS=Arabidopsis thaliana OX=3702 GN=NET3A PE=2 SV=1	NAB domain-containing protein OS=Handroanthus impetiginosus OX=429701 GN=CDL12_20681 PE=4 SV=1	Function unknown	protein NETWORKED 3C [Sesamum indicum]	molecular function: binding (GO:0005488)	--	--
c65427.graph_c0	0.5	0.47	0.24	0.4	0.57	0.37	0	0.31	0	0.11	0	0.04	0	0.11	0.22	0.11	0.74	0	0	0.25	0.96	0.11	0.44	0.24	0	0	0	0	--	--	--	--	--	--	--	--	--	--	--	--
c109772.graph_c0	0	0	0	0	0	0	0	0	0	0	0	0	0	0	0	0	0	0	2.31	0.77	0	0	0	0	0	0	0	0	--	--	--	--	--	--	--	--	--	--	--	--
c15525.graph_c0	0	0	0	0	0	0	0	0	0	0	0	0	0	0	2.1	0.7	0	0	0	0	0	0	0	0	0	0	0	0	General function prediction only	Molecular Function: glycerol dehydrogenase [NADP+] activity (GO:0047956);;	--	Energy production and conversion	Aldo/keto reductase family	--	Voltage-gated shaker-like K+ channel, subunit beta/KCNAB OS=Handroanthus impetiginosus OX=429701 GN=CDL12_01845 PE=4 SV=1	Energy production and conversion	hypothetical protein G4B88_008531 [Cannabis sativa]	molecular function: catalytic activity (GO:0003824);; biological process: metabolic process (GO:0008152);; biological process: single-organism process (GO:0044699)	--	--
c32033.graph_c0	0	0	0	0	0	0	0.42	0.14	0	0.34	0.42	0.25	0.4	0	0	0.13	0	0	0	0	0.39	0	0.13	0	0	0	0	0	--	--	--	--	--	--	--	--	--	--	--	--
c40343.graph_c0	0	0.24	0	0.08	0	0.13	0	0.04	0	0	0	0	0.12	0.12	1.03	0.42	0.48	0	0.21	0.23	0.38	0.23	0.2	0	0	0	0.12	0.04	--	--	--	--	--	--	--	--	--	--	--	--
c109731.graph_c0	0	0	0	0	0	0	0	0	0	0	0	0	0	0	0	0	0	0	0	0	0	0	0	0	0	0	0	0	--	--	--	--	--	--	--	--	--	--	--	--
c77978.graph_c0	0	0	0	0	0	1.03	0	0.34	0	0	0	0	0	0	0	0	0	0	0	0	0	0.72	0.24	0	0	0.82	0	0.27	--	--	--	--	--	--	--	--	--	--	--	--
c62161.graph_c0	0	0.21	0.44	0.22	0	0	0.22	0.07	0.19	0.19	0.44	0.27	0.21	1.28	0	0.5	0.83	0.38	0.54	0.58	1.1	1.63	1.13	0.67	0	0.67	0.64	0.44	--	Molecular Function: calcium ion binding (GO:0005509);;	K13448|1.9e-18|zju:107427870|K13448 calcium-binding protein CML | (RefSeq) putative calcium-binding protein CML23	Signal transduction mechanisms	EF hand;; EF-hand domain pair;; EF-hand domain pair;; EF-hand domain;; EF hand	Calcium-binding protein CML38 OS=Arabidopsis thaliana OX=3702 GN=CML38 PE=1 SV=1	Calcium-binding protein CML OS=Salvia splendens OX=180675 GN=CML PE=4 SV=1	Signal transduction mechanisms	calcium-binding protein CML [Salvia splendens]	molecular function: binding (GO:0005488)	Plant-pathogen interaction (ko04626)	--
c76136.graph_c2	0	0	0	0	0	0	0	0	0	0	0	0	0	0	0	0	0.13	0.15	0	0.09	0	0.41	0.14	0	0	0	1.35	0.45	--	--	--	--	--	--	--	--	--	--	--	--
c105866.graph_c0	0	0	0	0	0	0	0	0	0	0	0	0	0	1.87	0	0.62	0	0	0	0	0	0	0	0	0	0	0	0	--	--	--	--	--	--	--	--	--	--	--	--
c73647.graph_c1	0.63	0.59	0	0.41	0	0.77	0.32	0.36	0	0.58	0.91	0.5	0.62	0.65	0	0.42	1.09	0.84	0.27	0.73	0.65	0	0.22	0	1.82	0.67	0.63	1.04	--	--	--	--	--	--	--	--	--	--	--	--
c51066.graph_c0	0	3.38	0	1.13	0	0	0	0	1.54	0	0	0.51	0	0.96	0	0.32	0	0	0	0	0	0	0	0	0	0	0	0	--	--	--	--	--	--	--	--	--	--	--	--
c45077.graph_c0	0	0	0	0	0	0	0	0	0	0	0	0	0	0	0	0	0	0	0	0	0	0	0	0	0	0	0	0	--	--	--	--	--	--	--	--	--	--	--	--
c31646.graph_c0	0	0	1.45	0.48	0	1.05	0	0.35	0	0	0	0	0	0	0	0	0.35	0	0	0.12	0	0	0	0	0	0.51	0	0.17	--	--	--	--	--	--	--	--	--	--	--	--
c114625.graph_c0	0	0	0	0	0	0	0	0	0	0	0	0	0	0	0	0	0	0	0	0	0	0	0	0	0	0	0	0	Mobilome: prophages, transposons	--	--	--	Transposase IS66 family	--	--	--	--	--	--	--
c36746.graph_c1	0	0	0	0	0	0	0	0	0	0	0	0	0	0	0	0	0	0	0	0	0	0	0	0	0	0	0	0	--	Cellular Component: mitochondrial inner membrane (GO:0005743);; Molecular Function: NADH dehydrogenase (ubiquinone) activity (GO:0008137);; Cellular Component: integral component of membrane (GO:0016021);; Biological Process: ATP synthesis coupled electron transport (GO:0042773);; Cellular Component: respirasome (GO:0070469);;	K03883|4.7e-12|bpg:BathyMg00080|K03883 NADH-ubiquinone oxidoreductase chain 5 [EC:7.1.1.2] | (RefSeq) nad5; NADH dehydrogenase subunit 5	Energy production and conversion	--	NADH-ubiquinone oxidoreductase chain 5 OS=Chondrus crispus OX=2769 GN=ND5 PE=3 SV=1	NADH-ubiquinone oxidoreductase chain 5 OS=Triticum urartu OX=4572 PE=4 SV=1	Energy production and conversion	NADH dehydrogenase subunit 5 [Cladosporium cladosporioides]	cellular component: cell (GO:0005623);; cellular component: membrane (GO:0016020);; cellular component: organelle (GO:0043226);; cellular component: organelle part (GO:0044422);; cellular component: cell part (GO:0044464);; molecular function: catalytic activity (GO:0003824);; biological process: metabolic process (GO:0008152);; biological process: single-organism process (GO:0044699);; cellular …	Oxidative phosphorylation (ko00190)	--
c73510.graph_c0	6.35	3.84	12.48	7.56	6.69	2.69	1.54	3.64	5.89	1.1	1.86	2.95	4.38	2.62	2.28	3.09	5.04	3.71	9.45	6.07	8.56	3.82	6.4	6.81	4.73	1.73	2.96	3.14	--	Molecular Function: DNA binding (GO:0003677);; Cellular Component: nucleus (GO:0005634);;	K09422|2.5e-136|sind:105169011|K09422 transcription factor MYB, plant | (RefSeq) transcription factor MYB86	Transcription	Myb-like DNA-binding domain;; Myb-like DNA-binding domain	Transcription factor MYB61 OS=Arabidopsis thaliana OX=3702 GN=MYB61 PE=2 SV=1	MYB-related transcription factor OS=Salvia miltiorrhiza OX=226208 GN=MYB4 PE=2 SV=1	Transcription	MYB-related transcription factor [Salvia miltiorrhiza]	molecular function: binding (GO:0005488);; cellular component: cell (GO:0005623);; cellular component: organelle (GO:0043226);; cellular component: cell part (GO:0044464)	--	--
c42381.graph_c0	0.93	0	0	0.31	0	0	0	0	0	0	0	0	0	0	0.79	0.26	0	0	0	0	0	0	0	0	0	0	0	0	--	--	--	--	--	--	--	--	--	--	--	--
c81176.graph_c0	2.58	3.04	2.64	2.75	2.98	3.39	2.04	2.8	3.7	2.56	2.21	2.82	2.16	3.42	4.29	3.29	2.3	2.71	2.63	2.55	3.46	4.52	4.26	4.8	4.3	3.37	3.9	3.86	Translation, ribosomal structure and biogenesis	Biological Process: pseudouridine synthesis (GO:0001522);; Molecular Function: RNA binding (GO:0003723);; Molecular Function: rRNA pseudouridine synthase activity (GO:0120159);;	K22538|1.7e-06|mpp:MICPUCDRAFT_59888|K22538 mitochondrial RNA pseudouridine synthase RPUSD4 [EC:5.4.99.-] | (RefSeq) hypothetical protein	RNA processing and modification	RNA pseudouridylate synthase	RNA pseudouridine synthase 3, mitochondrial OS=Arabidopsis thaliana OX=3702 GN=At1g78910 PE=2 SV=1	RNA pseudouridylate synthase OS=Handroanthus impetiginosus OX=429701 GN=CDL12_26368 PE=4 SV=1	RNA processing and modification	RNA pseudouridylate synthase [Handroanthus impetiginosus]	biological process: metabolic process (GO:0008152);; biological process: cellular process (GO:0009987);; molecular function: binding (GO:0005488)	--	--
c38850.graph_c0	0	0	0	0	0	0	0	0	0	0	0	0	0	0	0	0	0	1.39	0	0.46	0	0	0	0	0	0	0	0	--	Molecular Function: calcium ion binding (GO:0005509);;	--	--	--	--	Uncharacterized protein OS=Camellia sinensis var. sinensis OX=542762 GN=TEA_011599 PE=4 SV=1	Posttranslational modification, protein turnover, chaperones	hypothetical protein TEA_011599 [Camellia sinensis var. sinensis]	molecular function: binding (GO:0005488)	--	--
c97964.graph_c0	0	0	0	0	0	0	0	0	0	0	0	0	0	0	0	0	0	0	0	0	0	0	0	0	0	0	0	0	--	--	--	--	--	--	--	--	--	--	--	--
c83040.graph_c1	25.25	22.56	23.83	23.88	22.29	18.89	21.53	20.9	24.04	19.29	21.39	21.57	21.48	20.71	26.94	23.04	21.55	20.66	19.64	20.62	22.76	16.76	21.28	24.32	24.2	22.26	21.28	22.58	--	Molecular Function: molecular_function (GO:0003674);; Molecular Function: nucleic acid binding (GO:0003676);; Molecular Function: RNA binding (GO:0003723);; Molecular Function: catalytic activity (GO:0003824);; Molecular Function: nuclease activity (GO:0004518);; Molecular Function: endonuclease activity (GO:0004519);; Molecular Function: binding (GO:0005488);; Cellular Component: cellular_compon…	--	General function prediction only	PPR repeat family;; PPR repeat;; Pentatricopeptide repeat domain;; PPR repeat;; Pentacotripeptide-repeat region of PRORP;; Tetratricopeptide repeat	Pentatricopeptide repeat-containing protein At3g29290 OS=Arabidopsis thaliana OX=3702 GN=EMB2076 PE=2 SV=1	Pentatricopeptide repeat protein (Fragment) OS=Salvia miltiorrhiza OX=226208 PE=2 SV=1	Function unknown	pentatricopeptide repeat protein, partial [Salvia miltiorrhiza]	molecular function: binding (GO:0005488);; molecular function: catalytic activity (GO:0003824);; biological process: metabolic process (GO:0008152);; biological process: cellular process (GO:0009987);; cellular component: cell (GO:0005623);; cellular component: cell part (GO:0044464);; cellular component: organelle (GO:0043226)	--	--
c84570.graph_c0	1.4	0.95	1.3	1.22	1.34	0.63	1.88	1.28	1.61	1.51	1.6	1.57	1.93	7.01	1.57	3.5	2.36	2.45	1.61	2.14	3.14	7.65	4.79	3.57	2.64	2.75	2.51	2.63	Signal transduction mechanisms	Molecular Function: protein serine/threonine kinase activity (GO:0004674);; Molecular Function: ATP binding (GO:0005524);;	K13436|1.5e-67|gab:108488231|K13436 pto-interacting protein 1 [EC:2.7.11.1] | (RefSeq) PTI1-like tyrosine-protein kinase 1	Signal transduction mechanisms	Protein kinase domain;; Protein tyrosine and serine/threonine kinase	Receptor like protein kinase S.2 OS=Arabidopsis thaliana OX=3702 GN=LECRKS2 PE=2 SV=2	Uncharacterized protein OS=Salvia splendens OX=180675 GN=Saspl_022012 PE=4 SV=1	Signal transduction mechanisms	hypothetical protein Saspl_022012 [Salvia splendens]	molecular function: catalytic activity (GO:0003824);; biological process: metabolic process (GO:0008152);; biological process: cellular process (GO:0009987);; molecular function: binding (GO:0005488)	Plant-pathogen interaction (ko04626)	--
c60866.graph_c0	0	0	0	0	0	0	0	0	1.79	0	0	0.6	0	0	0	0	0	0	0	0	0	0	0	0	0	0	0	0	--	--	--	--	--	--	--	--	--	--	--	--
c90297.graph_c0	1.17	0	1.1	0.76	0	0.31	0	0.1	0	0	0	0	0.52	0	0.5	0.34	0	0.95	0.23	0.39	0	0	0.19	0.56	0.26	0	0	0.09	--	--	--	--	--	--	--	--	--	--	--	--
c80813.graph_c2	28.32	32.22	31.19	30.58	30.86	27.08	38.19	32.04	46.31	33.46	38.96	39.58	42.72	30.64	45.06	39.47	28.48	36.48	37.77	34.24	37.5	40.1	36.27	31.21	35.76	36.62	33	35.13	--	--	--	--	--	--	--	--	--	--	--	--
c47507.graph_c0	0	0	0.5	0.17	0	0	0	0	0	0	0	0	0	0	0	0	0	0	0	0	0	0	0	0	0	0	0	0	--	--	--	--	--	--	--	--	--	--	--	--
c32508.graph_c0	0.28	0.26	0	0.18	0	0	0	0	0	0	0	0	0	0	0.73	0.24	0	0	0.44	0.15	0	0	0	0	0	0.83	0	0.28	--	--	--	--	--	--	--	--	--	--	--	--
c73153.graph_c2	22.13	27.91	25.15	25.06	21.67	27.59	29.02	26.09	28.3	27.07	30.88	28.75	29.4	36.75	29.03	31.73	24.09	23.82	26.4	24.77	27.67	22.18	26.28	28.98	25.46	27.44	29.27	27.39	--	Cellular Component: integral component of membrane (GO:0016021);;	--	--	--	Putative ion channel POLLUX-like 2 OS=Arabidopsis thaliana OX=3702 GN=At5g43745 PE=2 SV=1	Uncharacterized protein OS=Handroanthus impetiginosus OX=429701 GN=CDL12_05989 PE=4 SV=1	Inorganic ion transport and metabolism	hypothetical protein CDL12_05989 [Handroanthus impetiginosus]	cellular component: membrane (GO:0016020);; cellular component: membrane part (GO:0044425)	--	--
c110052.graph_c0	0	0	0	0	0	0	0	0	0	0	0.89	0.3	0	0	0	0	0	0	0	0	0	0	0.3	0.91	0	0	0	0	--	--	--	--	--	--	--	--	--	--	--	--
c60752.graph_c0	0	0	0	0	0	0	0	0	0	0	0	0	1.1	0	0	0.37	0	0	0.95	0.32	0	0	0	0	0.73	0	0	0.24	--	--	--	--	--	--	--	--	--	--	--	--
c54178.graph_c0	0	0	0	0	0	0	0	0	0	0	0	0	0	0	0	0	0	0	0	0	0	0	0	0	0	0	0	0	--	--	--	--	--	--	--	--	--	--	--	--
c46598.graph_c0	0	0.27	0	0.09	0	0	0	0	0.48	0	0	0.16	0.26	0	0	0.09	0.32	0.72	0	0.35	0.56	0.38	0.74	1.27	0.25	0	0	0.08	--	--	K12447|4.2e-40|thj:104808371|K12447 UDP-sugar pyrophosphorylase [EC:2.7.7.64] | (RefSeq) uncharacterized protein LOC104808371	General function prediction only	gag-polypeptide of LTR copia-type	--	Uncharacterized protein (Fragment) OS=Dorcoceras hygrometricum OX=472368 GN=F511_39676 PE=4 SV=1	Replication, recombination and repair	hypothetical protein F511_39676, partial [Dorcoceras hygrometricum]	--	Pentose and glucuronate interconversions (ko00040);; Galactose metabolism (ko00052);; Ascorbate and aldarate metabolism (ko00053);; Amino sugar and nucleotide sugar metabolism (ko00520)	--
c113176.graph_c0	0	0	3.63	1.21	0	0	0	0	0	0	0	0	0	0	0	0	0	0	0	0	0	0	0	0	0	0	0	0	--	Molecular Function: transferase activity (GO:0016740);;	K12670|3.7e-26|sind:105169612|K12670 oligosaccharyltransferase complex subunit beta | (RefSeq) dolichyl-diphosphooligosaccharide--protein glycosyltransferase 48 kDa subunit	Posttranslational modification, protein turnover, chaperones	--	Dolichyl-diphosphooligosaccharide--protein glycosyltransferase 48 kDa subunit OS=Oryza sativa subsp. japonica OX=39947 GN=OST48 PE=2 SV=1	Dolichyl-diphosphooligosaccharide--protein glycosyltransferase 48 kDa subunit OS=Hibiscus syriacus OX=106335 GN=F3Y22_tig00110890pilonHSYRG01645 PE=3 SV=1	Posttranslational modification, protein turnover, chaperones	dolichyl-diphosphooligosaccharide--protein glycosyltransferase 48 kDa subunit [Sesamum indicum]	molecular function: catalytic activity (GO:0003824)	N-Glycan biosynthesis (ko00510);; Various types of N-glycan biosynthesis (ko00513);; Protein processing in endoplasmic reticulum (ko04141)	LOC105169612
c13009.graph_c0	0	0.17	1.04	0.4	0.33	0	0.34	0.22	0	0	0	0	0	0	0	0	0.27	0	0.14	0.14	0.35	0.16	0.23	0.18	0.16	0.18	0	0.11	--	--	--	--	--	--	--	--	--	--	--	--
c96958.graph_c0	0	0	2.95	0.98	0	0	0	0	0	0	0	0	0	0	0	0	0	0	0	0	0	0	0	0	0	0	0	0	--	Molecular Function: ADP binding (GO:0043531);;	--	--	--	--	NB-ARC domain-containing protein OS=Salvia splendens OX=180675 GN=Saspl_039745 PE=4 SV=1	--	hypothetical protein Saspl_039745 [Salvia splendens]	molecular function: binding (GO:0005488)	--	--
c7910.graph_c0	0.13	0	0.48	0.2	0.57	0.12	0	0.23	0.21	0	0	0.07	0	0.11	0	0.04	0	0	0.1	0.03	0.24	0.11	0.12	0	0.11	0.37	0.47	0.32	--	Molecular Function: actin binding (GO:0003779);; Cellular Component: cellular_component (GO:0005575);; Cellular Component: intracellular (GO:0005622);; Cellular Component: obsolete cell (GO:0005623);; Cellular Component: nucleus (GO:0005634);; Cellular Component: nuclear envelope (GO:0005635);; Cellular Component: cytoplasm (GO:0005737);; Cellular Component: vacuole (GO:0005773);; Cellular Compon…	--	--	KIP1-like protein	Protein NETWORKED 3C OS=Arabidopsis thaliana OX=3702 GN=NET3C PE=1 SV=1	NAB domain-containing protein OS=Erythranthe guttata OX=4155 GN=MIMGU_mgv1a011980mg PE=4 SV=1	Function unknown	protein NETWORKED 3C [Sesamum indicum]	molecular function: binding (GO:0005488);; cellular component: cell (GO:0005623);; cellular component: cell part (GO:0044464);; cellular component: organelle (GO:0043226);; cellular component: organelle part (GO:0044422);; cellular component: membrane (GO:0016020)	--	LOC105163186
c68699.graph_c0	0.81	0.9	2.65	1.45	1.33	1.67	0.68	1.23	1.24	1.46	0.87	1.19	0.7	1.35	1.68	1.24	1.2	1.76	2.58	1.85	2.55	2.04	2.18	1.94	1.98	1.33	1.57	1.63	--	--	--	--	Protein of unknown function (DUF674)	--	Uncharacterized protein OS=Salvia splendens OX=180675 GN=Saspl_028270 PE=4 SV=1	--	hypothetical protein Saspl_028270 [Salvia splendens]	--	--	--
c79983.graph_c0	0	0	0	0	0	0	0	0	0	0	0	0	0	0	0	0	0	0	0	0	0	0	0	0	0	0	0	0	--	--	--	--	--	--	--	--	--	--	--	--
c75854.graph_c0	17.56	17.39	21.5	18.82	19.9	15.18	16.79	17.29	17.1	19.06	18.11	18.09	19.36	19.9	16.96	18.74	19.99	20.85	18.36	19.73	20.89	24.32	22.74	23.02	22.18	23.01	24.74	23.31	--	Molecular Function: nucleic acid binding (GO:0003676);; Molecular Function: DNA-directed 5'-3' RNA polymerase activity (GO:0003899);; Biological Process: transcription, DNA-templated (GO:0006351);;	K03015|7.9e-73|sind:105170649|K03015 DNA-directed RNA polymerase II subunit RPB7 | (RefSeq) DNA-directed RNA polymerase II subunit RPB7	Transcription	S1 RNA binding domain	DNA-directed RNA polymerase II subunit RPB7 OS=Glycine max OX=3847 PE=2 SV=1	DNA-directed RNA polymerase II subunit RPB7 OS=Salvia splendens OX=180675 GN=RPB7 PE=3 SV=1	Transcription	DNA-directed RNA polymerase II subunit RPB7 [Salvia splendens]	molecular function: binding (GO:0005488);; molecular function: catalytic activity (GO:0003824);; biological process: metabolic process (GO:0008152);; biological process: cellular process (GO:0009987)	RNA polymerase (ko03020)	--
c63334.graph_c0	0	0.28	1.66	0.65	0.27	0.65	0.84	0.59	0.25	0	0.53	0.26	1.06	0.26	0.52	0.61	0	0.24	0.47	0.24	0	0.51	0.26	0.27	1	0.29	0.83	0.71	--	--	--	--	--	--	--	--	--	--	--	--
c107780.graph_c0	0	0	0	0	0	0	0	0	0	0	0	0	0	0	0	0	0	0	0	0	0	0	0.28	0.85	0	0	0	0	--	--	--	--	--	--	--	--	--	--	--	--
c62016.graph_c0	24.62	22.88	32.21	26.57	34.64	24.12	20.79	26.52	25.45	23.42	14.49	21.12	23.24	18.8	21.8	21.28	37.95	32.8	45.8	38.85	37.07	38.32	38.2	39.22	38.39	25.73	29.41	31.18	Defense mechanisms	Molecular Function: antiporter activity (GO:0015297);; Cellular Component: integral component of membrane (GO:0016021);; Molecular Function: xenobiotic transmembrane transporter activity (GO:0042910);;	K03327|1.1e-163|sind:105155766|K03327 multidrug resistance protein, MATE family | (RefSeq) protein DETOXIFICATION 21-like isoform X1	General function prediction only	MatE	Protein DETOXIFICATION 21 OS=Arabidopsis thaliana OX=3702 GN=DTX21 PE=1 SV=1	Protein DETOXIFICATION OS=Rehmannia glutinosa OX=99300 PE=2 SV=1	Defense mechanisms	MATE32 [Rehmannia glutinosa]	molecular function: transporter activity (GO:0005215);; biological process: localization (GO:0051179);; cellular component: membrane (GO:0016020);; cellular component: membrane part (GO:0044425);; biological process: single-organism process (GO:0044699)	--	--
c77320.graph_c0	33.16	29.36	34.19	32.24	29.87	33.26	23.08	28.74	27.75	23.2	26.61	25.85	26.91	23.71	22.34	24.32	24.26	25.45	25	24.9	26.26	23.9	26.22	28.49	22.44	27.93	25.68	25.35	--	Cellular Component: extracellular region (GO:0005576);; Cellular Component: cell wall (GO:0005618);; Molecular Function: hydrolase activity (GO:0016787);; Biological Process: cell wall organization (GO:0071555);;	K01280|3.4e-116|spen:107013676|K01280 tripeptidyl-peptidase II [EC:3.4.14.10] | (RefSeq) tripeptidyl-peptidase 2-like isoform X1	Cell wall/membrane/envelope biogenesis	Pectinacetylesterase	Pectin acetylesterase 8 OS=Arabidopsis thaliana OX=3702 GN=PAE8 PE=2 SV=1	Pectin acetylesterase OS=Handroanthus impetiginosus OX=429701 GN=CDL12_30027 PE=3 SV=1	Cell wall/membrane/envelope biogenesis	pectin acetylesterase 8 isoform X1 [Sesamum indicum]	cellular component: extracellular region (GO:0005576);; cellular component: cell (GO:0005623);; cellular component: cell part (GO:0044464);; molecular function: catalytic activity (GO:0003824);; biological process: cellular process (GO:0009987);; biological process: cellular component organization or biogenesis (GO:0071840)	--	LOC105164984
c82923.graph_c0	5.33	6.93	8.2	6.82	5.64	5.95	6.4	6	8.35	18.46	11.19	12.67	13.85	37.92	17.44	23.07	8.94	9.04	16.16	11.38	19.4	21.79	21.02	21.87	13.4	13.38	15.51	14.1	Carbohydrate transport and metabolism	Molecular Function: phosphoglycerate mutase activity (GO:0004619);; Biological Process: glycolytic process (GO:0006096);;	K01834|3.8e-161|sind:105158938|K01834 2,3-bisphosphoglycerate-dependent phosphoglycerate mutase [EC:5.4.2.11] | (RefSeq) uncharacterized protein LOC105158938	Carbohydrate transport and metabolism	Histidine phosphatase superfamily (branch 1)	2,3-bisphosphoglycerate-dependent phosphoglycerate mutase 1 OS=Arabidopsis thaliana OX=3702 GN=gpmA1 PE=2 SV=1	Phosphoglycerate mutase (2,3-diphosphoglycerate-dependent) OS=Salvia splendens OX=180675 GN=PGAM PE=3 SV=1	Carbohydrate transport and metabolism	2,3-bisphosphoglycerate-dependent phosphoglycerate mutase [Salvia splendens]	molecular function: catalytic activity (GO:0003824);; biological process: metabolic process (GO:0008152);; biological process: cellular process (GO:0009987);; biological process: single-organism process (GO:0044699)	Glycolysis / Gluconeogenesis (ko00010);; Glycine, serine and threonine metabolism (ko00260);; Carbon metabolism (ko01200);; Biosynthesis of amino acids (ko01230)	--
c90226.graph_c0	0	0	0	0	0	0	0	0	0	0	0	0	0	0	0	0	0	0	0	0	0	0	0	0	0	0	0	0	--	--	--	--	--	--	--	--	--	--	--	--
c23105.graph_c0	0	0	0	0	0	0	0	0	0	0	0	0	0.87	1.09	0	0.65	0	0	0	0	0	0	0	0	0	0	0	0	--	--	--	--	--	--	--	--	--	--	--	--
c1137.graph_c0	0	0	0	0	0	0	0	0	0	0	0	0	0	0	0	0	0	0	0	0	0	0	0	0	0	0	0	0	--	--	--	--	--	--	--	--	--	--	--	--
c1200.graph_c0	0	0	0.28	0.09	0.27	0	0.28	0.18	0	0	0	0	0	0	0	0	0.21	0.24	0	0.15	0.28	0.26	0.18	0	0.53	0	0	0.18	--	--	--	--	--	--	--	--	--	--	--	--
c54474.graph_c0	0	0	0	0	0	0	0	0	0	0	0	0	3.11	0	0	1.04	0	0	0	0	0	0	0	0	0	0	0	0	--	Molecular Function: hydrolase activity (GO:0016787);;	--	--	--	--	DLH domain-containing protein OS=Carpinus fangiana OX=176857 GN=FH972_021078 PE=4 SV=1	--	hypothetical protein PaG_02699 [Moesziomyces aphidis DSM 70725]	molecular function: catalytic activity (GO:0003824)	--	--
[truncated: 96,470 more rows]
